# Supplementary material
Source: publisher figshare collection journal article supplement (https://gsapubs.figshare.com/ndownloader/files/25374344)
Supplement: Supplementary file 1 [file 25374344]

## Sheet: G48171
Magee, C., and Jackson, C.A.-L., 2020, Can we relate the surface expression of dike-induced normal faults to subsurface dike geometry?: Geology, v. 49, https://doi.org/10.1130/G48171.1

## Sheet: EF1 fault displacement data
Table S3: EF1 fault displacement data
Horizon	Distance*	Footwall				Hanging wall				Footwall and Hanging wall mid-point depth	Fault throw	Fault heave	Fault dip	Fault dip	Fault displacement
		X†	Y†	Cut-off depth	Cut-off depth	X	Y	Cut-off depth	Cut-off depth
				[TWT]				[TWT]
	(m)			(ms)	(m)			(ms)	(m)	(m)	(m)	(m)	(°)	(radians)	(m)
HK	0	183310	7.81609e+06	-2958.81	2674.26	183318	7.81609e+06	-2964.8	2682.49	2678.38	8.22813	8.2596	44.8906	0.78349	11.6586
	125	183334	7.81621e+06	-2961.95	2678.57	183350	7.81621e+06	-2970.81	2690.76	2684.67	12.1891	15.6112	37.9824	0.662918	19.8062
	250	183403	7.81633e+06	-2966.45	2684.76	183420	7.81633e+06	-2977.03	2699.34	2692.05	14.5815	17.5487	39.7236	0.693308	22.8162
	375	183447	7.81645e+06	-2970.56	2690.42	183465	7.81645e+06	-2980.63	2704.32	2697.37	13.8964	18.1329	37.4653	0.653893	22.8454
	500	183548	7.81656e+06	-2972.47	2693.05	183569	7.81656e+06	-2984.1	2709.12	2701.08	16.0636	20.9361	37.4978	0.654461	26.3887
	625	183588	7.81668e+06	-2982.04	2706.27	183599	7.81668e+06	-2988.78	2715.6	2710.93	9.33151	10.8024	40.8216	0.712472	14.2748
	750	183636	7.8168e+06	-2983	2707.59	183644	7.8168e+06	-2988.12	2714.68	2711.14	7.08898	7.97808	41.6229	0.726457	10.6725
	875	183682	7.81692e+06	-2981.68	2705.77	183693	7.81692e+06	-2988.58	2715.32	2710.54	9.55214	11.265	40.2962	0.703301	14.7697
	1000	183776	7.81704e+06	-2980.36	2703.94	183784	7.81704e+06	-2985.77	2711.43	2707.69	7.4843	8.18889	42.426	0.740473	11.0938
	1125	183854	7.81715e+06	-2976.54	2698.67	183862	7.81715e+06	-2983.19	2707.86	2703.26	9.18995	8.42084	47.5007	0.829043	12.4646
	1250	183885	7.81727e+06	-2980.02	2703.47	183897	7817273	-2988.1	2714.65	2709.06	11.1817	11.5168	44.1543	0.770637	16.052
	1375	183775	7.81742e+06	-2975.45	2697.16	183787	7.81741e+06	-2982.08	2706.32	2701.74	9.15896	12.5166	36.1946	0.631716	15.5097
	1500	183902	7.81752e+06	-2980.64	2704.33	183911	7.81752e+06	-2986.83	2712.9	2708.61	8.56527	8.56225	45.0101	0.785574	12.111
	1625	183850	7.81766e+06	-2978.99	2702.05	183864	7.81766e+06	-2987.28	2713.52	2707.78	11.4688	13.8574	39.6122	0.691363	17.9878
	1750	183843	7.81778e+06	-2977.6	2700.13	183853	7.81778e+06	-2982.77	2707.28	2703.7	7.14543	9.26931	37.6275	0.656724	11.7037
	1875	183802	7.81792e+06	-2971.31	2691.45	183812	7.81791e+06	-2975.86	2697.73	2694.59	6.27473	9.71208	32.8655	0.573611	11.5627
	2000	183786	7.81804e+06	-2966.56	2684.91	183796	7.81804e+06	-2972.36	2692.9	2688.91	7.98755	9.54954	39.9102	0.696565	12.4497
	2125	183722	7.81818e+06	-2970.86	2690.83	183722	7.81818e+06	-2970.86	2690.83	2690.83	0	0	0	0	0
	2250	183801	7.81842e+06	-2974.22	2695.47	183801	7.81842e+06	-2974.22	2695.47	2695.47	0	0	0	0	0
	2375	183816	7.81854e+06	-2981.32	2705.27	183821	7.81854e+06	-2985.17	2710.6	2707.93	5.32648	4.70967	48.5169	0.84678	7.11002
	2500	183833	7.81867e+06	-2988.03	2714.56	183859	7.81866e+06	-2997.42	2727.59	2721.07	13.032	26.0502	26.5772	0.46386	29.1281
	2625	183966	7.81878e+06	-2988.34	2714.99	183982	7.81877e+06	-2997.31	2727.44	2721.21	12.4495	16.2476	37.4607	0.653813	20.4689
	2750	184012	7.8189e+06	-2989.88	2717.12	184034	7.81889e+06	-3003.79	2736.45	2726.79	19.3314	22.1976	41.0519	0.716491	29.4353
	2875	184074	7.81901e+06	-2994.09	2722.96	184077	7.81901e+06	-2995.95	2725.55	2724.26	2.58338	2.98558	40.8692	0.713302	3.94811
	3000	184003	7.81915e+06	-2994.25	2723.19	184014	7.81915e+06	-3001.74	2733.6	2728.39	10.4132	10.8209	43.9	0.766199	15.0176
	3125	183958	7.81928e+06	-2998.21	2728.69	183971	7.81928e+06	-3005.09	2738.26	2733.48	9.57671	13.9678	34.4357	0.601016	16.9355
	3250	183987	7.8194e+06	-2996.49	2726.3	184013	7.8194e+06	-3006.95	2740.86	2733.58	14.5603	26.6456	28.654	0.500107	30.3643
	3375	183966	7.81953e+06	-2997.96	2728.34	183979	7.81953e+06	-3003.02	2735.38	2731.86	7.04064	13.5138	27.5194	0.480303	15.2379
	3500	184014	7.81965e+06	-2995.84	2725.39	184034	7.81965e+06	-3003.7	2736.33	2730.86	10.934	20.0282	28.6316	0.499715	22.8184
	3625	184029	7.81978e+06	-2996.72	2726.62	184037	7819776	-3003.82	2736.5	2731.56	9.87844	8.44197	49.4833	0.863646	12.9942
	3750	184061	7.8199e+06	-3000.64	2732.07	184072	7.8199e+06	-3005.73	2739.16	2735.61	7.08869	10.3782	34.3345	0.599251	12.5681
	3875	183967	7.82004e+06	-2993.86	2722.64	183981	7.82004e+06	-3000.48	2731.85	2727.24	9.20116	14.1191	33.0916	0.577557	16.8526
	4000	183939	7.82017e+06	-2986.45	2712.37	183956	7.82016e+06	-2994.92	2724.12	2718.24	11.7472	17.2163	34.3069	0.598768	20.8423
	4125	183919	7.8203e+06	-2984.18	2709.23	183933	7.82029e+06	-2991.86	2719.87	2714.55	10.6422	14.2407	36.771	0.641775	17.7779
	4250	184012	7.82041e+06	-2985.88	2711.58	184012	7.82041e+06	-2985.88	2711.58	2711.58	0	0	0	0	0
	4375	184227	7.82114e+06	-2983.56	2708.37	184227	7.82114e+06	-2983.56	2708.37	2708.37	0	0	0	0	0
	4500	184235	7.82126e+06	-2987.08	2713.24	184242	7.82126e+06	-2992.26	2720.42	2716.83	7.18184	7.04037	45.5699	0.795345	10.0571
	4625	184238	7.82139e+06	-2983.89	2708.82	184250	7.82139e+06	-2990.95	2718.61	2713.72	9.78107	11.1943	41.1455	0.718124	14.8655
	4750	184269	7.82151e+06	-2983.61	2708.44	184280	7.82151e+06	-2989.59	2716.72	2712.58	8.28256	11.7401	35.2027	0.614402	14.3677
	4875	184281	7.82164e+06	-2979.9	2703.31	184306	7.82163e+06	-2988.91	2715.78	2709.54	12.4702	25.0927	26.4257	0.461216	28.0205
	5000	184414	7.82174e+06	-2984.74	2710	184414	7.82174e+06	-2984.74	2710	2710	0	0	0	0	0
	5125	184386	7.82187e+06	-2984.82	2710.11	184386	7.82187e+06	-2984.82	2710.11	2710.11	0	0	0	0	0
	5250	184349	7.822e+06	-2975.35	2697.02	184359	7.822e+06	-2987	2713.13	2705.08	16.1067	9.57067	59.2811	1.03465	18.7356
	5375	184391	7.82213e+06	-2975.35	2697.02	184410	7.82212e+06	-2985.71	2711.34	2704.18	14.3201	19.3931	36.4427	0.636045	24.1073
	5500	184348	7.82226e+06	-2967.38	2686.04	184373	7.82225e+06	-2980.92	2704.72	2695.38	18.676	25.6868	36.0197	0.628662	31.7585
	5625	184322	7.82239e+06	-2963.1	2680.16	184332	7.82238e+06	-2966.91	2685.39	2682.77	5.23919	10.7304	26.0242	0.454209	11.9411
	5750	184407	7.8225e+06	-2959.69	2675.47	184407	7.8225e+06	-2959.69	2675.47	2675.47	0	0	0	0	0
	5875	184428	7.82288e+06	-2949.48	2661.48	184428	7.82288e+06	-2949.48	2661.48	2661.48	0	0	0	0	0
	6000	184422	7.823e+06	-2945.32	2655.79	184430	7.823e+06	-2950.39	2662.73	2659.26	6.93186	8.21994	40.1409	0.700591	10.7526
	6125	184421	7.82313e+06	-2940.06	2648.61	184441	7.82313e+06	-2951.25	2663.9	2656.26	15.288	19.8372	37.6205	0.656602	25.0447
	6250	184491	7.82325e+06	-2936.79	2644.16	184521	7.82324e+06	-2951.89	2664.78	2654.47	20.6208	30.3257	34.2148	0.597161	36.6724
	6375	184527	7823368	-2931.38	2636.8	184544	7.82337e+06	-2942.89	2652.48	2644.64	15.6801	17.3578	42.093	0.734662	23.3914
	6500	184540	7.82349e+06	-2929.69	2634.5	184555	7.82349e+06	-2941.51	2650.59	2642.55	16.0941	14.4627	48.056	0.838735	21.6377
	6625	184562	7.82362e+06	-2929.94	2634.84	184578	7.82361e+06	-2940.72	2649.51	2642.18	14.6767	16.4597	41.7225	0.728195	22.0528
	6750	184458	7.82376e+06	-2927.69	2631.78	184475	7.82375e+06	-2936.38	2643.6	2637.69	11.818	16.539	35.5479	0.620427	20.3275
	6875	184552	7.82387e+06	-2923.47	2626.05	184586	7.82386e+06	-2941.6	2650.72	2638.39	24.6602	34.481	35.5717	0.620843	42.3918
	7000	184607	7.82399e+06	-2930	2634.92	184626	7.82399e+06	-2941.86	2651.07	2642.99	16.1503	19.4242	39.742	0.693629	25.2613
	7125	184538	7.82412e+06	-2926.55	2630.23	184549	7.82412e+06	-2933.87	2640.18	2635.21	9.94875	11.2551	41.4745	0.723867	15.0218
	7250	184565	7.82425e+06	-2928.55	2632.95	184580	7.82424e+06	-2938.82	2646.92	2639.94	13.9746	14.7046	43.5419	0.759949	20.2858
	7375	184440	7.82439e+06	-2921.7	2623.66	184456	7.82439e+06	-2927.84	2631.99	2627.82	8.32963	15.3099	28.5492	0.498278	17.4292
	7500	184469	7.82451e+06	-2913.73	2612.87	184488	7.82451e+06	-2925.44	2628.73	2620.8	15.8581	18.9702	39.8939	0.696279	24.7254
	7625	184545	7.82463e+06	-2918.17	2618.87	184554	7.82463e+06	-2923.71	2626.38	2622.63	7.50591	8.86491	40.2545	0.702574	11.6157
	7750	184533	7.82475e+06	-2916.93	2617.2	184543	7.82475e+06	-2920.54	2622.08	2619.64	4.88737	9.84228	26.4076	0.460899	10.9889
	7875	184559	7.82488e+06	-2911.15	2609.38	184578	7.82487e+06	-2919.22	2620.3	2614.84	10.9123	18.7283	30.2279	0.527576	21.6755
	8000	184640	7.82499e+06	-2909.45	2607.09	184665	7.82499e+06	-2920.74	2622.35	2614.72	15.266	25.4548	30.9523	0.54022	29.6816
	8125	184735	7.82511e+06	-2914.58	2614.02	184761	7.8251e+06	-2928.81	2633.3	2623.66	19.2846	25.9187	36.6507	0.639676	32.3059
	8250	184733	7.82523e+06	-2914.5	2613.91	184745	7.82523e+06	-2919.5	2620.68	2617.29	6.76523	11.3754	30.741	0.536532	13.2351
	8375	184758	7.82535e+06	-2917.75	2618.31	184767	7.82535e+06	-2925.6	2628.94	2623.63	10.6383	8.73341	50.616	0.883415	13.7639
	8500	184797	7.82548e+06	-2915.72	2615.56	184810	7.82547e+06	-2922.53	2624.78	2620.17	9.22089	13.5039	34.3266	0.599111	16.3517
	8625	184881	7.82559e+06	-2916.57	2616.71	184887	7.82559e+06	-2921.95	2623.99	2620.35	7.28497	6.55534	48.0177	0.838067	9.80017
	8750	184881	7.82572e+06	-2920	2621.35	184881	7.82572e+06	-2920	2621.35	2621.35	0	0	0	0	0
	8875	184903	7.82584e+06	-2917.99	2618.63	184917	7.82584e+06	-2924.42	2627.34	2622.99	8.71251	13.6255	32.596	0.568908	16.1728
	9000	184970	7.82596e+06	-2914.58	2614.02	184982	7.82596e+06	-2919.35	2620.47	2617.25	6.45395	11.941	28.3906	0.495509	13.5736
	9125	185018	7.82608e+06	-2917.14	2617.48	185027	7.82608e+06	-2921.92	2623.95	2620.72	6.47312	9.69095	33.7411	0.588894	11.654
	9250	185025	7.8262e+06	-2914.3	2613.64	185033	7.8262e+06	-2918.27	2619.01	2616.32	5.37028	7.91728	34.149	0.596012	9.56678
	9375	185061	7.82632e+06	-2914.21	2613.52	185067	7.82632e+06	-2916.59	2616.74	2615.13	3.2185	6.13241	27.692	0.483317	6.92569
	9500	185044	7.82645e+06	-2906.69	2603.37	185062	7.82645e+06	-2916.7	2616.89	2610.13	13.5196	18.0721	36.7998	0.642277	22.5695
	9625	185100	7.82657e+06	-2907.18	2604.03	185124	7.82657e+06	-2921.36	2623.19	2613.61	19.1684	24.7391	37.7692	0.659198	31.2962
	9750	185147	7.82669e+06	-2909.17	2606.71	185162	7.82669e+06	-2916.57	2616.71	2611.71	9.99848	15.1784	33.3742	0.582489	18.1756
	9875	185181	7.82681e+06	-2911.46	2609.8	185187	7.82681e+06	-2916	2615.94	2612.87	6.136	5.31498	49.101	0.856974	8.11785
	10000	185192	7.82694e+06	-2912.03	2610.57	185200	7.82694e+06	-2917.63	2618.14	2614.36	7.57147	8.0574	43.2191	0.754316	11.0566
	10125	185201	7.82706e+06	-2914.3	2613.64	185209	7.82706e+06	-2918.27	2619.01	2616.32	5.37028	7.86641	34.3208	0.599011	9.52472
	10250	185216	7.82719e+06	-2916	2615.94	185228	7.82718e+06	-2919.48	2620.65	2618.29	4.70978	12.0018	21.4262	0.373957	12.8929
	10375	185237	7.82731e+06	-2918	2618.64	185237	7.82731e+06	-2918	2618.64	2618.64	0	0	0	0	0
	10500	185288	7.82781e+06	-2924.8	2627.86	185288	7.82781e+06	-2924.8	2627.86	2627.86	0	0	0	0	0
	10625	185303	7.82793e+06	-2912.59	2611.33	185338	7.82793e+06	-2928.2	2632.47	2621.9	21.1454	34.9349	31.1857	0.544292	40.836
	10750	185352	7.82805e+06	-2914.32	2613.67	185378	7.82805e+06	-2929.95	2634.85	2624.26	21.185	27.019	38.0992	0.664957	34.3341
	10875	185358	7.82818e+06	-2914.82	2614.34	185372	7.82817e+06	-2923.55	2626.16	2620.25	11.8209	15.0878	38.0776	0.664579	19.1671
	11000	185391	7.8283e+06	-2914.29	2613.63	185405	7.8283e+06	-2921.21	2622.99	2618.31	9.36546	13.5237	34.7034	0.605689	16.45
	11125	185434	7.82842e+06	-2916.77	2616.98	185438	7.82842e+06	-2918.61	2619.47	2618.23	2.49019	3.25719	37.3986	0.652729	4.10004
	11250	185451	7.82854e+06	-2915.05	2614.65	185462	7.82854e+06	-2917.45	2617.9	2616.28	3.24648	10.5903	17.043	0.297457	11.0767
	11375	185535	7.82866e+06	-2912.24	2610.86	185545	7.82866e+06	-2917.16	2617.51	2614.18	6.65178	10.0841	33.4099	0.583114	12.0804
	11500	185573	7.82878e+06	-2910.94	2609.1	185582	7.82878e+06	-2915.84	2615.72	2612.41	6.62179	9.15765	35.8703	0.626054	11.3009
	11625	185621	7.8289e+06	-2912.88	2611.72	185633	7.8289e+06	-2918.95	2619.93	2615.83	8.20996	12.2126	33.911	0.591859	14.7157
	11750	185716	7.82901e+06	-2915.15	2614.79	185728	7.82901e+06	-2920.31	2621.77	2618.28	6.98345	12.1518	29.8852	0.521595	14.0156
	11875	185690	7.82914e+06	-2916.95	2617.22	185690	7.82914e+06	-2916.95	2617.22	2617.22	0	0	0	0	0
	12000	185888	7.83e+06	-2914.28	2613.61	185888	7.83e+06	-2914.28	2613.61	2613.61	0	0	0	0	0
	12125	185967	7.83011e+06	-2913.45	2612.49	185975	7.83011e+06	-2917.73	2618.28	2615.38	5.78826	8.69375	33.6555	0.587399	10.4444
	12250	186087	7.83022e+06	-2914.89	2614.44	186091	7.83022e+06	-2918.32	2619.08	2616.76	4.64032	3.65038	51.8091	0.904239	5.90406
	12375	186092	7.83035e+06	-2913.1	2612.02	186103	7.83035e+06	-2920.26	2621.7	2616.86	9.68675	11.528	40.0397	0.698824	15.0575
	12500	186103	7.83047e+06	-2912.87	2611.71	186124	7.83047e+06	-2926.24	2629.81	2620.76	18.1059	21.5117	40.0866	0.699643	28.1172
	12625	186054	7.83061e+06	-2910.89	2609.03	186069	7.8306e+06	-2919.22	2620.3	2614.66	11.2634	15.2689	36.4151	0.635563	18.9738
	12750	185950	7.83075e+06	-2914.04	2613.29	185967	7.83074e+06	-2921.04	2622.76	2618.02	9.47306	17.1655	28.8929	0.504275	19.6059
	12875	186172	7.83084e+06	-2915.43	2615.17	186172	7.83084e+06	-2915.43	2615.17	2615.17	0	0	0	0	0
	13000	186267	7.83121e+06	-2909.06	2606.56	186267	7.83121e+06	-2909.06	2606.56	2606.56	0	0	0	0	0
	13125	186326	7.83133e+06	-2909.79	2607.55	186340	7.83133e+06	-2919.76	2621.03	2614.29	13.4797	14.1898	43.5298	0.759739	19.5717
	13250	186314	7.83145e+06	-2905.47	2601.72	186332	7.83145e+06	-2916.15	2616.14	2608.93	14.4201	18.2334	38.3392	0.669146	23.2464
	13375	186394	7.83157e+06	-2906.74	2603.43	186415	7.83157e+06	-2918.52	2619.35	2611.39	15.9152	21.2302	36.8571	0.643277	26.5333
	13500	186420	7.83169e+06	-2910.18	2608.07	186424	7.83169e+06	-2912.73	2611.52	2609.8	3.44376	4.64888	36.53	0.637569	5.78547
	13625	186427	7.83182e+06	-2908.17	2605.36	186432	7.83182e+06	-2912.4	2611.07	2608.22	5.71032	5.63877	45.3612	0.791703	8.02518
	13750	186391	7.83195e+06	-2904.05	2599.81	186396	7.83195e+06	-2907.25	2604.12	2601.96	4.31305	4.80151	41.9324	0.731858	6.45421
	13875	186343	7.83208e+06	-2906.07	2602.53	186350	7.83208e+06	-2910.06	2607.91	2605.22	5.38226	7.83537	34.4859	0.601892	9.50588
	14000	186412	7.8322e+06	-2906.21	2602.72	186422	7.8322e+06	-2911.22	2609.48	2606.1	6.75967	9.83366	34.5047	0.60222	11.9329
	14125	186473	7.83232e+06	-2901.21	2595.98	186482	7.83232e+06	-2906.3	2602.84	2599.41	6.85601	8.50276	38.8802	0.678587	10.9225
	14250	186577	7.83243e+06	-2901.25	2596.04	186580	7.83243e+06	-2904.51	2600.43	2598.23	4.38976	3.20762	53.8443	0.93976	5.4368
	14375	186596	7.83255e+06	-2899.25	2593.35	186601	7.83255e+06	-2902.93	2598.3	2595.82	4.95229	4.58939	47.1781	0.823413	6.75186
	14500	186657	7.83267e+06	-2897.59	2591.12	186661	7.83267e+06	-2900.45	2594.96	2593.04	3.84607	3.56115	47.2028	0.823844	5.24157
	14625	186681	7.83279e+06	-2896.65	2589.85	186686	7.83279e+06	-2900.24	2594.68	2592.27	4.82681	5.5258	41.1373	0.717982	7.33707
	14750	186675	7.83292e+06	-2891.88	2583.45	186679	7.83292e+06	-2895.56	2588.39	2585.92	4.93982	3.58098	54.0609	0.94354	6.10125
	14875	186705	7.83304e+06	-2889.57	2580.35	186714	7.83304e+06	-2895.64	2588.49	2584.42	8.14491	9.08694	41.8709	0.730784	12.203
	15000	186751	7.83316e+06	-2892.06	2583.69	186751	7.83316e+06	-2892.06	2583.69	2583.69	0	0	0	0	0
HJ	0	183323	7.81609e+06	-2968.5	2687.58	183331	7.81609e+06	-2974.69	2696.11	2691.85	8.53072	8.54242	44.9607	0.784713	12.0725
	125	183353	7.81621e+06	-2972.88	2693.62	183369	7.81621e+06	-2981.63	2705.7	2699.66	12.0815	15.4302	38.0603	0.664278	19.5973
	250	183422	7.81633e+06	-2978.28	2701.07	183440	7.81632e+06	-2988.67	2715.44	2708.26	14.3757	17.8402	38.862	0.67827	22.9114
	375	183473	7.81645e+06	-2984.73	2709.99	183486	7.81644e+06	-2992.38	2720.59	2715.29	10.6025	13.7867	37.5616	0.655573	17.3921
	500	183571	7.81656e+06	-2984.99	2710.35	183592	7.81656e+06	-2996.95	2726.94	2718.64	16.5892	21.5414	37.6	0.656244	27.1889
	625	183602	7.81668e+06	-2991.04	2718.73	183617	7.81668e+06	-3000.93	2732.47	2725.6	13.7408	15.4103	41.7221	0.728188	20.6467
	750	183648	7.8168e+06	-2990.71	2718.27	183661	7.8168e+06	-2998.85	2729.58	2723.93	11.3049	12.6567	41.771	0.729041	16.9703
	875	183699	7.81692e+06	-2992.05	2720.13	183716	7.81692e+06	-3002.34	2734.43	2727.28	14.3022	16.8119	40.3884	0.704911	22.0725
	1000	183790	7.81703e+06	-2990.84	2718.45	183811	7.81703e+06	-3003.9	2736.61	2727.53	18.1533	21.1892	40.5875	0.708386	27.9021
	1125	183868	7.81715e+06	-2987.49	2713.81	183881	7.81715e+06	-2997.58	2727.81	2720.81	14.0026	12.7882	47.5954	0.830697	18.9634
	1250	183901	7.81727e+06	-2990.74	2718.31	183921	7.81727e+06	-3004.85	2737.93	2728.12	19.6156	20.1101	44.2868	0.772951	28.0925
	1375	183791	7.81741e+06	-2984.6	2709.81	183804	7.81741e+06	-2992.19	2720.33	2715.07	10.5187	12.849	39.3053	0.686006	16.6054
	1500	183922	7.81752e+06	-2993.06	2721.53	183933	7.81752e+06	-3000.16	2731.4	2726.47	9.86649	11.75	40.0201	0.698483	15.3431
	1625	183869	7.81765e+06	-2990.4	2717.84	183883	7.81765e+06	-2998.52	2729.12	2723.48	11.2759	13.5845	39.6946	0.692801	17.6546
	1750	183873	7.81778e+06	-2994.31	2723.27	183886	7.81778e+06	-3001.36	2733.07	2728.17	9.80098	13.1417	36.7152	0.640802	16.394
	1875	183825	7.81791e+06	-2984	2708.98	183842	7.81791e+06	-2993.59	2722.27	2715.62	13.2923	17.1952	37.7048	0.658072	21.7338
	2000	183806	7.81804e+06	-2978.81	2701.8	183816	7.81804e+06	-2984.16	2709.2	2705.5	7.39741	9.71208	37.2955	0.650929	12.2084
	2125	183736	7.81818e+06	-2982.44	2706.82	183736	7.81818e+06	-2982.44	2706.82	2706.82	0	0	0	0	0
	2250	183786	7.8183e+06	-2980.96	2704.77	183790	7.8183e+06	-2982.27	2706.58	2705.68	1.81141	3.3279	28.5599	0.498464	3.78894
	2375	183816	7.81842e+06	-2987.18	2713.38	183819	7.81842e+06	-2990.54	2718.04	2715.71	4.65724	3.10717	56.29	0.982446	5.59861
	2500	183827	7.81854e+06	-2993.32	2721.89	183833	7.81854e+06	-2998.96	2729.73	2725.81	7.83639	5.1947	56.4598	0.98541	9.4018
	2625	183865	7.81866e+06	-2999.67	2730.72	183885	7.81866e+06	-3006.78	2740.62	2735.67	9.90201	19.6151	26.7853	0.467492	21.9728
	2750	183993	7.81877e+06	-3003.27	2735.73	183998	7.81877e+06	-3005.57	2738.93	2737.33	3.20445	4.81012	33.6711	0.587671	5.77977
	2875	184031	7.81889e+06	-3001.82	2733.71	184053	7.81889e+06	-3016.32	2753.94	2743.83	20.2329	22.4904	41.9754	0.732609	30.2521
	3000	184088	7.81901e+06	-3003.09	2735.48	184095	7.81901e+06	-3007.33	2741.39	2738.43	5.90887	7.06882	39.8924	0.696254	9.21319
	3125	184020	7819148	-3005.6	2738.98	184027	7.81915e+06	-3010.33	2745.57	2742.27	6.59772	7.28223	42.1767	0.736122	9.82654
	3250	183982	7.81928e+06	-3010.35	2745.6	183992	7.81928e+06	-3015.68	2753.05	2749.32	7.44702	10.2355	36.0385	0.62899	12.6579
	3375	184020	7.8194e+06	-3009.37	2744.23	184045	7.8194e+06	-3019.35	2758.18	2751.21	13.9501	25.4052	28.7714	0.502155	28.9833
	3500	183999	7.81953e+06	-3010.5	2745.81	184009	7.81953e+06	-3014.29	2751.1	2748.46	5.29426	10.1251	27.6044	0.481788	11.4257
	3625	184058	7.81965e+06	-3013.32	2749.75	184068	7.81965e+06	-3017.26	2755.26	2752.5	5.50904	10.0557	28.7163	0.501193	11.4659
	3750	184056	7.81977e+06	-3012.79	2749.01	184073	7.81977e+06	-3021.63	2761.38	2755.19	12.3682	18.0126	34.475	0.601703	21.8501
	3875	184090	7.8199e+06	-3014.59	2751.52	184097	7.81989e+06	-3017.86	2756.1	2753.81	4.57363	7.7957	30.3996	0.530573	9.03831
	4000	183991	7.82003e+06	-3005.11	2738.29	184005	7.82003e+06	-3011.85	2747.7	2742.99	9.403	14.2605	33.3998	0.582936	17.0815
	4125	183966	7.82016e+06	-2999.6	2730.62	183985	7.82016e+06	-3009.04	2743.77	2737.2	13.1517	19.4142	34.1148	0.595415	23.4495
	4250	183938	7.82029e+06	-2995.78	2725.31	183956	7.82029e+06	-3005.8	2739.25	2732.28	13.9435	18.84	36.5052	0.637136	23.4386
	4375	184032	7.82041e+06	-2996.98	2726.98	184032	7.82041e+06	-2996.98	2726.98	2726.98	0	0	0	0	0
	4500	184179	7.82089e+06	-2992.41	2720.63	184179	7.82089e+06	-2992.41	2720.63	2720.63	0	0	0	0	0
	4625	184220	7.82101e+06	-2991.41	2719.24	184225	7.82101e+06	-2996.66	2726.53	2722.89	7.28943	5.23436	54.3188	0.948042	8.97409
	4750	184241	7.82114e+06	-2995.78	2725.31	184250	7.82114e+06	-2999.48	2730.45	2727.88	5.14343	8.62304	30.815	0.537823	10.0405
	4875	184250	7.82126e+06	-2997.7	2727.98	184256	7.82126e+06	-3001.79	2733.67	2730.82	5.68955	6.60492	40.742	0.711081	8.71757
	5000	184252	7.82139e+06	-2996.66	2726.53	184259	7.82139e+06	-3001.47	2733.22	2729.88	6.68963	6.54543	45.6242	0.796293	9.35915
	5125	184283	7.82151e+06	-2993.89	2722.69	184289	7.82151e+06	-2997.28	2727.4	2725.04	4.7093	6.16215	37.3882	0.652547	7.75562
	5250	184320	7.82163e+06	-2991.7	2719.65	184330	7.82163e+06	-2996.75	2726.66	2723.15	7.01218	9.65129	36.0004	0.628326	11.9297
	5375	184420	7.82174e+06	-2995.12	2724.39	184420	7.82174e+06	-2995.12	2724.39	2724.39	0	0	0	0	0
	5500	184391	7.82187e+06	-2991.99	2720.05	184394	7.82187e+06	-2995.85	2725.41	2722.73	5.35926	3.37877	57.7704	1.00828	6.33544
	5625	184357	7.822e+06	-2985.43	2710.96	184368	7822002	-2994.29	2723.24	2717.1	12.2848	10.8309	48.599	0.848213	16.3775
	5750	184408	7.82212e+06	-2984.99	2710.35	184420	7.82212e+06	-2994.39	2723.38	2716.86	13.0328	12.4261	46.3652	0.809225	18.0072
	5875	184363	7.82225e+06	-2978.51	2701.39	184386	7.82225e+06	-2990.38	2717.82	2709.6	16.4287	24.1239	34.2554	0.597869	29.1867
	6000	184334	7.82238e+06	-2972.89	2693.63	184344	7.82238e+06	-2977.18	2699.55	2696.59	5.91903	10.7416	28.8564	0.503639	12.2645
	6125	184422	7.8225e+06	-2972.27	2692.78	184422	7.8225e+06	-2972.27	2692.78	2692.78	0	0	0	0	0
	6250	184438	7.82288e+06	-2959.54	2675.27	184438	7.82288e+06	-2959.54	2675.27	2675.27	0	0	0	0	0
	6375	184434	7.823e+06	-2955.32	2669.48	184441	7.823e+06	-2960.48	2676.56	2673.02	7.07874	7.41243	43.6809	0.762375	10.2495
	6500	184435	7.82313e+06	-2948.72	2660.44	184456	7.82313e+06	-2961.12	2677.43	2668.94	16.9939	20.3916	39.8071	0.694765	26.5445
	6625	184513	7.82324e+06	-2946.72	2657.71	184533	7.82324e+06	-2959.28	2674.91	2666.31	17.2021	19.9687	40.7434	0.711107	26.3564
	6750	184543	7.82337e+06	-2940.99	2649.88	184565	7.82336e+06	-2957.6	2672.6	2661.24	22.7207	22.0351	45.8777	0.800716	31.6508
	6875	184555	7.82349e+06	-2941.51	2650.59	184569	7.82349e+06	-2953.32	2666.74	2658.66	16.1446	14.2096	48.6475	0.849058	21.5073
	7000	184577	7.82361e+06	-2939.89	2648.38	184598	7.82361e+06	-2953.49	2666.97	2657.68	18.5871	21.7238	40.5505	0.707741	28.5903
	7125	184473	7.82375e+06	-2935.36	2642.21	184497	7.82375e+06	-2947.98	2659.43	2650.82	17.2186	24.0023	35.6545	0.622289	29.5397
	7250	184581	7.82387e+06	-2938.7	2646.76	184608	7.82386e+06	-2953.32	2666.74	2656.75	19.9765	27.7941	35.706	0.623187	34.2283
	7375	184626	7.82399e+06	-2941.86	2651.07	184643	7.82398e+06	-2952.63	2665.79	2658.43	14.7221	16.9223	41.0226	0.715979	22.43
	7500	184549	7.82412e+06	-2933.87	2640.18	184566	7.82412e+06	-2944.78	2655.06	2647.62	14.8737	16.7412	41.6194	0.726396	22.3941
	7625	184581	7.82424e+06	-2939.88	2648.37	184600	7.82424e+06	-2950.99	2663.55	2655.96	15.1776	18.3649	39.5719	0.69066	23.8249
	7750	184453	7.82439e+06	-2931.41	2636.84	184471	7.82438e+06	-2939.18	2647.41	2642.13	10.5785	17.488	31.1699	0.544017	20.4385
	7875	184488	7.82451e+06	-2925.44	2628.73	184505	7.82451e+06	-2936.29	2643.48	2636.1	14.7497	17.3664	40.3421	0.704102	22.7847
	8000	184559	7.82462e+06	-2927	2630.84	184570	7.82462e+06	-2932.88	2638.84	2634.84	7.99089	11.0443	35.8869	0.626345	13.632
	8125	184552	7.82475e+06	-2926.64	2630.36	184561	7.82475e+06	-2931.36	2636.77	2633.56	6.41241	9.09686	35.1802	0.61401	11.1298
	8250	184587	7.82487e+06	-2924.37	2627.28	184600	7.82487e+06	-2929.59	2634.36	2630.82	7.08685	12.6058	29.3442	0.512153	14.4613
	8375	184667	7.82499e+06	-2922.64	2624.93	184683	7.82499e+06	-2931.34	2636.74	2630.84	11.8115	15.7216	36.9171	0.644325	19.6642
	8500	184752	7.8251e+06	-2923.44	2626.01	184778	7.8251e+06	-2938.76	2646.84	2636.43	20.828	25.5354	39.2024	0.684211	32.9524
	8625	184748	7.82523e+06	-2924.47	2627.41	184762	7.82523e+06	-2933.83	2640.13	2633.77	12.7168	14.0484	42.1518	0.735688	18.9492
	8750	184771	7.82535e+06	-2928.3	2632.61	184783	7.82535e+06	-2936.36	2643.57	2638.09	10.9624	11.9001	42.6513	0.744406	16.1798
	8875	184818	7.82547e+06	-2927.83	2631.97	184825	7.82547e+06	-2932.34	2638.1	2635.04	6.12937	6.69546	42.4726	0.741286	9.07735
	9000	184897	7.82559e+06	-2928.53	2632.92	184905	7.82559e+06	-2934.12	2640.52	2636.72	7.60034	8.3911	42.1691	0.73599	11.3215
	9125	184893	7.82572e+06	-2929.67	2634.47	184898	7.82571e+06	-2933.19	2639.26	2636.86	4.78607	5.28394	42.1696	0.735998	7.12927
	9250	184916	7.82584e+06	-2927.86	2632.01	184932	7.82584e+06	-2937.84	2645.59	2638.8	13.5761	15.8742	40.5381	0.707523	20.8878
	9375	184979	7.82596e+06	-2923.92	2626.67	184993	7.82595e+06	-2932.95	2638.93	2632.8	12.2655	14.2208	40.7778	0.711706	18.7796
	9500	185027	7.82608e+06	-2925.97	2629.45	185038	7.82607e+06	-2931.18	2636.52	2632.98	7.07709	10.7701	33.3092	0.581355	12.8872
	9625	185041	7.8262e+06	-2924.95	2628.06	185051	7.8262e+06	-2930.4	2635.46	2631.76	7.40085	9.34864	38.3669	0.669629	11.9235
	9750	185081	7.82632e+06	-2925.95	2629.42	185088	7.82632e+06	-2930.18	2635.16	2632.29	5.7449	7.18048	38.6623	0.674785	9.19582
	9875	185070	7.82645e+06	-2921.34	2623.17	185087	7.82645e+06	-2930.77	2635.97	2629.57	12.7985	17.0042	36.9675	0.645204	21.2825
	10000	185124	7.82657e+06	-2921.36	2623.19	185144	7.82657e+06	-2932.63	2638.5	2630.85	15.3006	20.3407	36.951	0.644917	25.453
	10125	185170	7.82669e+06	-2921.72	2623.68	185183	7.82669e+06	-2929.76	2634.59	2629.14	10.9108	12.8986	40.2276	0.702104	16.8943
	10250	185199	7.82681e+06	-2924.02	2626.8	185212	7.82681e+06	-2932.71	2638.6	2632.7	11.8034	13.5237	41.1142	0.717578	17.9502
	10375	185211	7.82693e+06	-2924.57	2627.55	185218	7.82693e+06	-2929.31	2633.98	2630.76	6.4351	7.51288	40.5814	0.70828	9.89211
	10500	185213	7.82706e+06	-2924.51	2627.47	185220	7.82706e+06	-2929.15	2633.76	2630.61	6.2991	7.69525	39.3027	0.685962	9.94462
	10625	185239	7827183	-2930.05	2634.99	185250	7.82718e+06	-2933.88	2640.2	2637.59	5.20851	10.8222	25.7005	0.448559	12.0104
	10750	185259	7.82731e+06	-2931.65	2637.16	185265	7.82731e+06	-2934.99	2641.71	2639.43	4.54423	6.34322	35.6175	0.621642	7.80298
	10875	185266	7.82743e+06	-2930.63	2635.78	185275	7.82743e+06	-2935.13	2641.9	2638.84	6.12156	8.63167	35.3442	0.616872	10.582
	11000	185307	7.82755e+06	-2933.61	2639.83	185307	7.82755e+06	-2933.61	2639.83	2639.83	0	0	0	0	0
	11125	185324	7.82768e+06	-2935.95	2643.01	185324	7.82768e+06	-2935.95	2643.01	2643.01	0	0	0	0	0
	11250	185302	7.82781e+06	-2932.48	2638.29	185315	7.8278e+06	-2939.37	2647.67	2642.98	9.38243	13.6453	34.5122	0.602352	16.5597
	11375	185335	7.82793e+06	-2926.59	2630.29	185369	7.82792e+06	-2942.73	2652.26	2641.27	21.9692	34.4909	32.4954	0.567151	40.8934
	11500	185381	7.82805e+06	-2931.18	2636.52	185400	7.82804e+06	-2942.52	2651.97	2644.25	15.447	19.6052	38.2347	0.667321	24.9595
	11625	185387	7.82817e+06	-2931.94	2637.56	185400	7.82817e+06	-2939.4	2647.71	2642.64	10.1578	12.8986	38.2208	0.667079	16.4181
	11750	185414	7.82829e+06	-2927.73	2631.84	185428	7.82829e+06	-2937.34	2644.91	2638.37	13.0714	14.1389	42.7533	0.746186	19.2554
	11875	185454	7.82842e+06	-2927.63	2631.7	185463	7.82841e+06	-2933.16	2639.22	2635.46	7.5164	9.87332	37.2814	0.650683	12.4088
	12000	185478	7.82854e+06	-2925.66	2629.03	185487	7.82854e+06	-2929.99	2634.91	2631.97	5.88024	8.86362	33.5608	0.585746	10.6368
	12125	185558	7.82865e+06	-2923.89	2626.62	185569	7.82865e+06	-2929.35	2634.04	2630.33	7.41178	11.1844	33.532	0.585244	13.4173
	12250	185594	7.82878e+06	-2922.29	2624.46	185605	7.82877e+06	-2928.63	2633.06	2628.76	8.60297	11.8294	36.0267	0.628785	14.6269
	12375	185638	7.8289e+06	-2924.02	2626.8	185649	7.82889e+06	-2929.53	2634.28	2630.54	7.48004	10.4489	35.5977	0.621298	12.8503
	12500	185738	7.82901e+06	-2928.11	2632.35	185741	7.82901e+06	-2930.19	2635.18	2633.76	2.82595	2.1285	53.0131	0.925253	3.53787
	12625	185724	7.82914e+06	-2929.99	2634.91	185724	7.82914e+06	-2929.99	2634.91	2634.91	0	0	0	0	0
	12750	185829	7.82975e+06	-2930.58	2635.71	185829	7.82975e+06	-2930.58	2635.71	2635.71	0	0	0	0	0
	12875	185872	7.82987e+06	-2926.78	2630.55	185881	7.82987e+06	-2930.81	2636.02	2633.28	5.47463	9.60042	29.6939	0.518256	11.0517
	13000	185908	7.83e+06	-2925.04	2628.18	185916	7.82999e+06	-2928.9	2633.42	2630.8	5.24045	8.17898	32.6486	0.569825	9.7138
	13125	185982	7.83011e+06	-2924.32	2627.21	185990	7.83011e+06	-2928.65	2633.09	2630.15	5.87757	7.9272	36.5548	0.638002	9.86845
	13250	186102	7.83022e+06	-2925.72	2629.11	186109	7.83022e+06	-2929.69	2634.5	2631.8	5.39113	6.15224	41.2277	0.719559	8.18011
	13375	186108	7.83035e+06	-2923.54	2626.15	186122	7.83035e+06	-2931.8	2637.37	2631.76	11.2167	13.2818	40.1815	0.701299	17.3845
	13500	186124	7.83047e+06	-2926.24	2629.81	186145	7.83047e+06	-2939.2	2647.44	2638.63	17.6291	20.8456	40.2212	0.701993	27.3006
	13625	186073	7.8306e+06	-2921.41	2623.26	186090	7.8306e+06	-2930.54	2635.65	2629.46	12.391	17.7496	34.9188	0.609448	21.6469
	13750	185974	7.83074e+06	-2923.84	2626.56	185993	7.83074e+06	-2931.71	2637.24	2631.9	10.6875	19.2927	28.9849	0.505882	22.0551
	13875	186189	7.83084e+06	-2926.65	2630.37	186189	7.83084e+06	-2926.65	2630.37	2630.37	0	0	0	0	0
	14000	186220	7.83109e+06	-2924.41	2627.33	186220	7.83109e+06	-2924.41	2627.33	2627.33	0	0	0	0	0
	14125	186285	7.83121e+06	-2919.79	2621.07	186306	7.8312e+06	-2931.71	2637.24	2629.16	16.1763	21.3716	37.1223	0.647906	26.8033
	14250	186344	7.83132e+06	-2922.17	2624.29	186357	7.83132e+06	-2931.4	2636.82	2630.56	12.5301	13.1404	43.6381	0.761628	18.157
	14375	186332	7.83145e+06	-2916.15	2616.14	186354	7.83145e+06	-2930.3	2635.33	2625.73	19.1861	22.4507	40.5168	0.707151	29.532
	14500	186416	7.83157e+06	-2918.26	2619	186431	7.83157e+06	-2929.04	2633.62	2626.31	14.6188	15.4711	43.3775	0.757079	21.2853
	14625	186434	7.83169e+06	-2920.25	2621.69	186437	7.83169e+06	-2921.53	2623.43	2622.56	1.73419	3.08603	29.3337	0.511969	3.53992
	14750	186441	7.83182e+06	-2918.6	2619.46	186450	7.83182e+06	-2925.61	2628.96	2624.21	9.5013	9.33872	45.4944	0.794027	13.3224
	14875	186423	7.83194e+06	-2918.59	2619.44	186427	7.83194e+06	-2921.23	2623.02	2621.23	3.57557	4.68984	37.3222	0.651395	5.8974
	15000	186365	7.83208e+06	-2917.49	2617.95	186374	7.83208e+06	-2922.42	2624.63	2621.29	6.67721	9.68233	34.5912	0.603731	11.7615
	15125	186433	7.8322e+06	-2916.94	2617.21	186442	7.83219e+06	-2921.76	2623.74	2620.47	6.52689	9.45901	34.6064	0.603995	11.4923
	15250	186495	7.83231e+06	-2914.55	2613.98	186505	7.83231e+06	-2918.65	2619.52	2616.75	5.54673	9.19731	31.0934	0.542683	10.7404
	15375	186587	7.83243e+06	-2910.88	2609.02	186591	7.83243e+06	-2915.04	2614.64	2611.83	5.62094	4.1949	53.2661	0.929668	7.01371
	15500	186609	7.83255e+06	-2911.71	2610.14	186611	7.83255e+06	-2913.64	2612.75	2611.44	2.60754	1.67451	57.2922	0.999937	3.09891
	15625	186674	7.83267e+06	-2912.17	2610.76	186683	7.83267e+06	-2918.77	2619.69	2615.22	8.92546	9.30897	43.7951	0.764369	12.8965
	15750	186699	7.83279e+06	-2908.72	2606.1	186706	7.83279e+06	-2912.48	2611.18	2608.64	5.07639	6.90887	36.3071	0.633678	8.57334
	15875	186876	7.83289e+06	-2909.79	2607.55	186879	7.83289e+06	-2911.71	2610.14	2608.84	2.59233	2.56265	45.3298	0.791155	3.64519
	16000	186726	7.83304e+06	-2903.65	2599.27	186734	7.83304e+06	-2907.72	2604.75	2602.01	5.48572	8.28073	33.5232	0.58509	9.93296
	16125	186760	7.83316e+06	-2900.68	2595.27	186768	7.83316e+06	-2903.97	2599.7	2597.49	4.42932	7.29215	31.2749	0.54585	8.53196
	16250	186773	7.83329e+06	-2901.87	2596.87	186773	7.83329e+06	-2901.87	2596.87	2596.87	0	0	0	0	0
HI	0	183380	7.81608e+06	-3003.66	2736.27	183401	7.81608e+06	-3015.65	2753.01	2744.64	16.7338	21.1383	38.3662	0.669617	26.9601
	125	183416	7.8162e+06	-3008.9	2743.58	183433	7.8162e+06	-3018.3	2756.71	2750.15	13.1361	16.5701	38.406	0.670311	21.1453
	250	183483	7.81632e+06	-3014.01	2750.71	183502	7.81632e+06	-3024.89	2765.95	2758.33	15.2336	18.6973	39.1714	0.68367	24.1174
	375	183537	7.81644e+06	-3020.52	2759.82	183555	7.81644e+06	-3030.68	2774.08	2766.95	14.2542	18.314	37.8945	0.661383	23.2074
	500	183649	7.81655e+06	-3029.02	2771.74	183664	7.81655e+06	-3037.25	2783.32	2777.53	11.575	15.1374	37.4037	0.652818	19.0558
	625	183665	7816673	-3031.86	2775.73	183691	7.81667e+06	-3048.56	2799.28	2787.51	23.5419	26.0092	42.1493	0.735644	35.0813
	750	183711	7.81679e+06	-3031.27	2774.91	183740	7.81679e+06	-3050.2	2801.6	2788.25	26.69	29.4885	42.1483	0.735626	39.7735
	875	183760	7.81691e+06	-3029.73	2772.74	183783	7.81691e+06	-3044.09	2792.96	2782.85	20.2214	23.4578	40.7624	0.711438	30.9705
	1000	183856	7.81703e+06	-3033.67	2778.28	183875	7.81702e+06	-3046.7	2796.65	2787.46	18.3681	19.6971	43.0005	0.7505	26.9326
	1125	183921	7.81714e+06	-3030.14	2773.32	183938	7.81714e+06	-3042.96	2791.37	2782.34	18.0507	16.2575	47.9919	0.837617	24.2927
	1250	183958	7.81726e+06	-3031.64	2775.43	183981	7817262	-3047.53	2797.82	2786.62	22.3954	22.6615	44.6616	0.779493	31.8606
	1375	183868	7.8174e+06	-3030.01	2773.13	183880	7.8174e+06	-3037.6	2783.81	2778.47	10.6772	12.849	39.7258	0.693346	16.7063
	1500	183991	7.81751e+06	-3034.81	2779.88	184006	7.81751e+06	-3043.28	2791.82	2785.85	11.9356	14.3411	39.7693	0.694105	18.6581
	1625	183940	7.81765e+06	-3033.43	2777.94	183958	7.81764e+06	-3044.09	2792.96	2785.45	15.0202	17.8303	40.1108	0.700065	23.3136
	1750	183946	7.81777e+06	-3035.14	2780.35	183966	7.81777e+06	-3046.66	2796.59	2788.47	16.2433	20.6447	38.1958	0.666642	26.2688
	1875	183912	7.8179e+06	-3033	2777.34	183931	7.8179e+06	-3043.91	2792.71	2785.02	15.3709	19.5048	38.2402	0.667418	24.8335
	2000	183890	7.81803e+06	-3030.37	2773.64	183902	7.81803e+06	-3037.62	2783.84	2778.74	10.1995	11.9113	40.5732	0.708136	15.6815
	2125	183802	7.81817e+06	-3026.01	2767.52	183811	7.81817e+06	-3031.82	2775.68	2771.6	8.16014	9.03607	42.084	0.734505	12.1753
	2250	183838	7.81829e+06	-3019.93	2759	183851	7.81829e+06	-3028.62	2771.18	2765.09	12.1866	12.354	44.609	0.778573	17.3532
	2375	183854	7.81841e+06	-3029.36	2772.22	183854	7.81841e+06	-3029.36	2772.22	2772.22	0	0	0	0	0
	2500	183870	7.81854e+06	-3039.23	2786.11	183870	7.81854e+06	-3039.23	2786.11	2786.11	0	0	0	0	0
	2625	183952	7.81865e+06	-3044.89	2794.09	183971	7.81865e+06	-3054.62	2807.85	2800.97	13.759	18.6279	36.4505	0.636181	23.1583
	2750	184066	7.81876e+06	-3044.22	2793.15	184089	7.81876e+06	-3056.89	2811.07	2802.11	17.9211	22.9741	37.9562	0.662461	29.1371
	2875	184095	7.81889e+06	-3043.64	2792.33	184128	7.81888e+06	-3065.25	2822.93	2807.63	30.6049	33.5023	42.4122	0.740232	45.3769
	3000	184159	7.819e+06	-3049.21	2800.2	184183	7.819e+06	-3066.7	2824.99	2812.59	24.7982	23.7618	46.2227	0.806738	34.3449
	3125	184090	7.81914e+06	-3056.25	2810.16	184114	7.81914e+06	-3071.29	2831.52	2820.84	21.3647	23.5893	42.1669	0.735951	31.8262
	3250	184060	7.81927e+06	-3058.13	2812.83	184082	7.81927e+06	-3072.36	2833.05	2822.94	20.2237	21.9855	42.6099	0.743683	29.8724
	3375	184114	7.81939e+06	-3060.37	2816	184128	7.81939e+06	-3068.58	2827.67	2821.83	11.6652	13.7259	40.36	0.704415	18.0132
	3500	184082	7.81952e+06	-3061.79	2818.02	184102	7.81952e+06	-3075.7	2837.81	2827.91	19.7913	20.6136	43.834	0.765048	28.5765
	3625	184146	7.81964e+06	-3060.36	2815.99	184170	7.81963e+06	-3077.87	2840.9	2828.45	24.9164	24.0433	46.0217	0.803229	34.6252
	3750	184138	7.81976e+06	-3061.09	2817.02	184144	7.81976e+06	-3065.61	2823.44	2820.23	6.41989	6.60622	44.1805	0.771095	9.21179
	3875	184160	7.81989e+06	-3061.62	2817.78	184165	7.81989e+06	-3065.92	2823.88	2820.83	6.10825	5.51718	47.9106	0.836197	8.23104
	4000	184077	7.82002e+06	-3056.37	2810.33	184085	7.82002e+06	-3062.55	2819.1	2814.71	8.76659	7.90737	47.9499	0.836883	11.8059
	4125	184051	7.82015e+06	-3049.29	2800.31	184061	7.82015e+06	-3057.71	2812.23	2806.27	11.9211	10.0954	49.7404	0.868133	15.6214
	4250	184031	7.82028e+06	-3046.37	2796.18	184041	7.82028e+06	-3054.62	2807.85	2802.02	11.669	9.83366	49.8785	0.870544	15.2599
	4375	184139	7.82039e+06	-3044.89	2794.09	184152	7.82039e+06	-3054.15	2807.19	2800.64	13.0934	12.436	46.4751	0.811144	18.058
	4500	184167	7.82052e+06	-3040.45	2787.83	184185	7.82051e+06	-3053.04	2805.61	2796.72	17.7858	18.386	44.0494	0.768808	25.5809
	4625	184298	7.82062e+06	-3044.46	2793.48	184313	7.82062e+06	-3051.97	2804.1	2798.79	10.6144	14.8757	35.5094	0.619755	18.2744
	4750	184280	7.82075e+06	-3039.38	2786.32	184287	7.82075e+06	-3045.88	2795.49	2790.9	9.17023	7.62455	50.2583	0.877173	11.9259
	4875	184228	7.82089e+06	-3034.3	2779.17	184240	7.82088e+06	-3044.85	2794.04	2786.6	14.8692	12.3752	50.2304	0.876685	19.3452
	5000	184277	7.82101e+06	-3035.59	2780.98	184288	7.821e+06	-3044.2	2793.12	2787.05	12.1362	11.0939	47.5692	0.830239	16.4427
	5125	184294	7.82113e+06	-3034.37	2779.26	184309	7.82113e+06	-3045.69	2795.22	2787.24	15.9568	14.8956	46.97	0.819781	21.8288
	5250	184303	7.82125e+06	-3037.27	2783.35	184321	7.82125e+06	-3050.38	2801.85	2792.6	18.5028	17.8402	46.0446	0.80363	25.7027
	5375	184303	7.82138e+06	-3033.96	2778.69	184325	7.82138e+06	-3050.23	2801.64	2790.16	22.9498	22.1368	46.033	0.803427	31.8862
	5500	184339	7.8215e+06	-3033.79	2778.45	184358	7.8215e+06	-3047.03	2797.11	2787.78	18.6655	18.6887	44.9645	0.784779	26.4134
	5625	184377	7.82162e+06	-3030.3	2773.54	184400	7.82162e+06	-3047.04	2797.13	2785.34	23.5864	23.6204	44.9588	0.784679	33.3802
	5750	184448	7.82174e+06	-3033.02	2777.37	184459	7.82174e+06	-3044.84	2794.02	2785.69	16.6556	10.8731	56.8627	0.992441	19.8905
	5875	184424	7.82187e+06	-3032.67	2776.87	184436	7.82187e+06	-3039.65	2786.7	2781.79	9.82665	12.4347	38.318	0.668775	15.8488
	6000	184414	7.822e+06	-3029.79	2772.83	184424	7.82199e+06	-3037.62	2783.84	2778.33	11.0145	10.2169	47.1512	0.822944	15.0235
	6125	184468	7.82211e+06	-3032.33	2776.4	184473	7.82211e+06	-3035.76	2781.22	2778.81	4.82552	4.42685	47.4673	0.82846	6.54848
	6250	184436	7.82225e+06	-3023.47	2763.96	184447	7.82224e+06	-3030.56	2773.91	2768.93	9.9517	11.5875	40.657	0.709599	15.2744
	6375	184407	7.82238e+06	-3019.2	2757.97	184424	7.82237e+06	-3030.13	2773.3	2765.64	15.3298	16.8318	42.3262	0.738732	22.7665
	6500	184487	7.82249e+06	-3012.61	2748.76	184504	7.82249e+06	-3023.3	2763.72	2756.24	14.9602	17.1344	41.1245	0.717758	22.7464
	6625	184537	7.82261e+06	-3011.93	2747.81	184548	7.82261e+06	-3019.83	2758.86	2753.33	11.0482	11.5776	43.6597	0.762005	16.0032
	6750	184551	7.82273e+06	-3010.56	2745.89	184565	7.82273e+06	-3019.97	2759.05	2752.47	13.1573	14.4515	42.3161	0.738555	19.5438
	6875	184510	7.82287e+06	-3005.06	2738.22	184530	7.82286e+06	-3018.26	2756.66	2747.44	18.4347	20.4425	42.0436	0.733799	27.5269
	7000	184507	7.82299e+06	-3002.55	2734.73	184517	7.82299e+06	-3008.97	2743.68	2739.2	8.94854	10.1661	41.3554	0.721788	13.5435
	7125	184513	7.82312e+06	-2997.63	2727.88	184530	7.82312e+06	-3008.18	2742.57	2735.23	14.6913	16.7511	41.2518	0.71998	22.2808
	7250	184602	7.82323e+06	-3003.73	2736.37	184617	7.82323e+06	-3012.46	2748.55	2742.46	12.1777	15.0878	38.9077	0.679068	19.3892
	7375	184617	7.82336e+06	-2994.61	2723.69	184637	7.82335e+06	-3008.63	2743.2	2733.44	19.5151	19.9178	44.4149	0.775187	27.8848
	7500	184625	7.82348e+06	-2993.29	2721.85	184643	7.82348e+06	-3005.66	2739.06	2730.46	17.2062	17.5587	44.4192	0.775261	24.5837
	7625	184663	7.8236e+06	-2996.73	2726.63	184676	7.8236e+06	-3005.72	2739.14	2732.89	12.512	13.7358	42.3305	0.738806	18.5802
	7750	184581	7.82374e+06	-2992.9	2721.31	184590	7.82374e+06	-2997.59	2727.83	2724.57	6.5145	8.91578	36.1545	0.631015	11.0422
	7875	184686	7.82385e+06	-2994.54	2723.59	184698	7.82385e+06	-2999.96	2731.12	2727.36	7.53348	11.5776	33.0519	0.576864	13.8128
	8000	184711	7.82397e+06	-2996.37	2726.13	184719	7.82397e+06	-3000.01	2731.19	2728.66	5.06096	7.87633	32.7229	0.571122	9.36215
	8125	184637	7.82411e+06	-2991.24	2719.01	184643	7.82411e+06	-2994.96	2724.17	2721.59	5.16348	6.30356	39.3222	0.686301	8.1484
	8250	184659	7.82423e+06	-2987.83	2714.28	184678	7.82423e+06	-2999.61	2730.63	2722.46	16.3544	19.2418	40.3626	0.70446	25.253
	8375	184557	7.82437e+06	-2985.54	2711.11	184567	7.82437e+06	-2991.07	2718.77	2714.94	7.66363	10.3372	36.5519	0.63795	12.8682
	8500	184579	7.8245e+06	-2982.71	2707.19	184588	7.82449e+06	-2988.08	2714.63	2710.91	7.43471	8.37989	41.5797	0.725703	11.2026
	8625	184641	7.82461e+06	-2978.7	2701.65	184652	7.82461e+06	-2985.32	2710.8	2706.23	9.15502	11.043	39.6599	0.692197	14.3444
	8750	184651	7.82474e+06	-2977.95	2700.61	184663	7.82474e+06	-2984.69	2709.93	2705.27	9.31884	12.999	35.6363	0.62197	15.9942
	8875	184687	7.82486e+06	-2976.83	2699.07	184697	7.82486e+06	-2981.97	2706.17	2702.62	7.10211	10.1661	34.9385	0.609793	12.4012
	9000	184759	7.82498e+06	-2975.43	2697.13	184772	7.82497e+06	-2982.89	2707.44	2702.29	10.3069	13.1404	38.1094	0.665135	16.7004
	9125	184841	7.82509e+06	-2977.38	2699.83	184853	7.82509e+06	-2984.1	2709.12	2704.47	9.28939	11.9919	37.7628	0.659084	15.169
	9250	184825	7.82522e+06	-2976.44	2698.53	184842	7.82522e+06	-2987.87	2714.34	2706.43	15.8077	17.1556	42.6585	0.744531	23.328
	9375	184841	7.82534e+06	-2975.59	2697.36	184856	7.82534e+06	-2985.2	2710.64	2704	13.2829	14.9464	41.6274	0.726535	19.9958
	9500	184889	7.82546e+06	-2975.95	2697.85	184904	7.82546e+06	-2986.15	2711.95	2704.9	14.1014	15.2193	42.8165	0.747289	20.748
	9625	184970	7.82558e+06	-2977.76	2700.35	184983	7.82558e+06	-2986.53	2712.48	2706.42	12.1289	13.1503	42.6861	0.745013	17.8897
	9750	184962	7.82571e+06	-2976.08	2698.03	184970	7.82571e+06	-2981.87	2706.03	2702.03	7.99911	8.68254	42.654	0.744452	11.8056
	9875	184999	7.82583e+06	-2976.99	2699.29	185008	7.82583e+06	-2982.21	2706.5	2702.89	7.21313	9.00632	38.6911	0.675287	11.5388
	10000	185062	7.82595e+06	-2973.22	2694.09	185077	7.82594e+06	-2983.51	2708.3	2701.19	14.2131	15.0072	43.4433	0.758229	20.6696
	10125	185095	7.82607e+06	-2971.57	2691.81	185107	7.82607e+06	-2979.27	2702.44	2697.12	10.6253	11.2254	43.4269	0.757942	15.4565
	10250	185120	7.82619e+06	-2971.32	2691.47	185131	7.82619e+06	-2977.99	2700.67	2696.07	9.20162	11.3767	38.9664	0.680092	14.6321
	10375	185160	7.82631e+06	-2973.22	2694.09	185169	7.82631e+06	-2978.24	2701.01	2697.55	6.92783	8.51268	39.1396	0.683114	10.9755
	10500	185164	7.82644e+06	-2973.52	2694.5	185180	7.82643e+06	-2982.58	2707.01	2700.76	12.5129	15.9859	38.0519	0.664131	20.3008
	10625	185214	7.82656e+06	-2971.88	2692.24	185228	7.82655e+06	-2979.37	2702.57	2697.41	10.3362	13.525	37.3881	0.652545	17.0224
	10750	185249	7.82668e+06	-2971.09	2691.15	185266	7.82668e+06	-2982.17	2706.45	2698.8	15.2955	17.8104	40.6558	0.709578	23.4769
	10875	185273	7.8268e+06	-2972.23	2692.72	185291	7.8268e+06	-2983.4	2708.15	2700.43	15.4258	17.3763	41.5971	0.726007	23.2356
	11000	185288	7.82692e+06	-2973.89	2695.01	185302	7.82692e+06	-2982.61	2707.05	2701.03	12.0441	13.8376	41.036	0.716214	18.345
	11125	185286	7.82705e+06	-2971.28	2691.41	185302	7.82705e+06	-2981	2704.83	2698.12	13.4159	15.409	41.0445	0.716361	20.431
	11250	185317	7.82717e+06	-2977.62	2700.16	185322	7.82717e+06	-2980.92	2704.72	2702.44	4.55953	5.17357	41.3901	0.722394	6.89602
	11375	185340	7.8273e+06	-2977.01	2699.32	185352	7.82729e+06	-2983.62	2708.45	2703.88	9.13604	11.9509	37.3965	0.652693	15.043
	11500	185362	7.82742e+06	-2978.14	2700.88	185374	7.82742e+06	-2984.15	2709.18	2705.03	8.30904	12.2226	34.2084	0.597048	14.7794
	11625	185389	7.82754e+06	-2975.59	2697.36	185403	7.82754e+06	-2982.84	2707.37	2702.36	10.017	13.757	36.0598	0.629362	17.0174
	11750	185405	7.82767e+06	-2979.9	2703.31	185410	7.82766e+06	-2982.33	2706.67	2704.99	3.35953	4.60922	36.0873	0.629841	5.70363
	11875	185394	7.82779e+06	-2979.55	2702.82	185406	7.82779e+06	-2985.36	2710.86	2706.84	8.03604	11.5168	34.9061	0.609226	14.0433
	12000	185452	7.82791e+06	-2980.95	2704.76	185468	7.82791e+06	-2988.63	2715.39	2710.07	10.6307	16.7412	32.4157	0.565761	19.8313
	12125	185470	7.82804e+06	-2983.34	2708.06	185480	7.82803e+06	-2989.34	2716.37	2712.22	8.30955	10.3571	38.7404	0.676147	13.2784
	12250	185468	7.82816e+06	-2980.29	2703.85	185484	7.82816e+06	-2988.67	2715.44	2709.65	11.5985	15.4004	36.9845	0.645501	19.2795
	12375	185487	7.82829e+06	-2977.24	2699.63	185503	7.82828e+06	-2987.26	2713.49	2706.56	13.8581	16.2476	40.462	0.706194	21.3549
	12500	185542	7.8284e+06	-2977.74	2700.32	185550	7.8284e+06	-2982.02	2706.24	2703.28	5.91477	7.64438	37.7306	0.658523	9.66545
	12625	185579	7.82853e+06	-2975.22	2696.84	185594	7.82852e+06	-2982.92	2707.48	2702.16	10.6382	15.7824	33.9821	0.593099	19.033
	12750	185658	7.82864e+06	-2972.89	2693.63	185674	7.82864e+06	-2980.96	2704.77	2699.2	11.1414	16.5304	33.9798	0.593059	19.9345
	12875	185690	7.82876e+06	-2974.24	2695.49	185699	7.82876e+06	-2979.27	2702.44	2698.96	6.94401	9.3883	36.4883	0.636841	11.6773
	13000	185717	7.82889e+06	-2973.22	2694.09	185727	7.82888e+06	-2979.05	2702.13	2698.11	8.04676	10.0147	38.7816	0.676867	12.847
	13125	185822	7.829e+06	-2974.09	2695.29	185831	7.829e+06	-2978.48	2701.35	2698.32	6.05953	8.35014	35.9676	0.627754	10.3171
	13250	185797	7.82913e+06	-2974.36	2695.66	185803	7.82913e+06	-2976.58	2698.72	2697.19	3.06344	5.91037	27.3984	0.478193	6.65711
	13375	185802	7.82925e+06	-2976.64	2698.8	185809	7.82925e+06	-2979.89	2703.29	2701.05	4.48894	7.37277	31.3353	0.546904	8.63182
	13500	185815	7.82938e+06	-2975.12	2696.71	185826	7.82938e+06	-2979.86	2703.25	2699.98	6.54526	10.7515	31.332	0.546846	12.5871
	13625	185841	7.8295e+06	-2975.01	2696.55	185851	7.8295e+06	-2980.03	2703.49	2700.02	6.93197	10.5692	33.2595	0.580488	12.6396
	13750	185845	7.82963e+06	-2976.24	2698.25	185848	7.82962e+06	-2977.71	2700.28	2699.27	2.02951	2.41133	40.0859	0.69963	3.15173
	13875	185918	7.82974e+06	-2972.75	2693.44	185924	7.82974e+06	-2974.6	2695.99	2694.71	2.55134	6.29235	22.0709	0.38521	6.78992
	14000	185956	7.82986e+06	-2970.41	2690.21	185964	7.82986e+06	-2973.68	2694.72	2692.47	4.50721	8.26952	28.5921	0.499027	9.41806
	14125	185996	7.82998e+06	-2971.76	2692.07	186002	7.82998e+06	-2974.15	2695.37	2693.72	3.29526	5.92029	29.1005	0.5079	6.77559
	14250	186074	7.8301e+06	-2974.53	2695.89	186076	7.8301e+06	-2975.67	2697.47	2696.68	1.57292	1.88534	39.838	0.695304	2.45532
	14375	186177	7.83021e+06	-2973.87	2694.98	186181	7.83021e+06	-2976.88	2699.14	2697.06	4.15345	4.68984	41.529	0.724817	6.26464
	14500	186185	7.83034e+06	-2971.7	2691.99	186194	7.83034e+06	-2977.13	2699.48	2695.74	7.49037	8.73341	40.6186	0.708929	11.5056
	14625	186197	7.83046e+06	-2972.1	2692.54	186207	7.83046e+06	-2978.41	2701.25	2696.9	8.70672	10.1462	40.6337	0.709191	13.3699
	14750	186164	7.83059e+06	-2971.6	2691.85	186175	7.83059e+06	-2977.78	2700.38	2696.12	8.52573	11.3357	36.9473	0.644852	14.184
	14875	186089	7.83073e+06	-2971.4	2691.58	186101	7.83073e+06	-2976.14	2698.11	2694.85	6.53715	11.6272	29.346	0.512185	13.3389
	15000	186289	7.83083e+06	-2968.48	2687.56	186301	7.83083e+06	-2972.89	2693.63	2690.59	6.07578	12.4446	26.0229	0.454185	13.8486
	15125	186295	7.83095e+06	-2966.66	2685.05	186304	7.83095e+06	-2971.19	2691.29	2688.17	6.23744	8.97528	34.7977	0.607334	10.9298
	15250	186289	7.83108e+06	-2965.81	2683.88	186297	7.83108e+06	-2970.4	2690.2	2687.04	6.31832	8.0574	38.1023	0.66501	10.2393
	15375	186363	7.8312e+06	-2966.45	2684.76	186368	7.8312e+06	-2969.63	2689.14	2686.95	4.37731	5.22444	39.958	0.697399	6.81583
	15500	186403	7.83132e+06	-2964.59	2682.2	186407	7.83132e+06	-2967.82	2686.65	2684.42	4.44341	4.04358	47.6973	0.832474	6.00786
	15625	186407	7.83144e+06	-2964.03	2681.43	186414	7.83144e+06	-2968.23	2687.21	2684.32	5.77766	6.67692	40.8702	0.71332	8.82965
	15750	186486	7.83156e+06	-2964.1	2681.53	186490	7.83156e+06	-2966.85	2685.31	2683.42	3.78216	4.30656	41.2906	0.720658	5.7316
	15875	186492	7.83168e+06	-2962.87	2679.84	186494	7.83168e+06	-2965.14	2682.96	2681.4	3.12047	1.65469	62.0643	1.08323	3.53204
	16000	186506	7.83181e+06	-2961.6	2678.09	186506	7.83181e+06	-2961.6	2678.09	2678.09	0	0	0	0	0
	16125	186484	7.83194e+06	-2955.76	2670.08	186490	7.83194e+06	-2959.68	2675.46	2672.77	5.37732	6.48464	39.6669	0.692318	8.42414
	16250	186443	7.83207e+06	-2957.21	2672.07	186443	7.83207e+06	-2957.21	2672.07	2672.07	0	0	0	0	0
	16375	186507	7.83219e+06	-2955.29	2669.44	186507	7.83219e+06	-2955.29	2669.44	2669.44	0	0	0	0	0
	16500	186560	7.83231e+06	-2953.31	2666.72	186560	7.83231e+06	-2953.31	2666.72	2666.72	0	0	0	0	0
	16625	186624	7.83242e+06	-2949.06	2660.91	186629	7.83242e+06	-2954.54	2668.41	2664.66	7.50237	5.40552	54.2269	0.946439	9.2469
	16750	186663	7.83254e+06	-2947.37	2658.6	186674	7.83254e+06	-2954.02	2667.7	2663.15	9.10077	10.5593	40.7573	0.711349	13.9399
	16875	186716	7.83266e+06	-2945.63	2656.22	186723	7.83266e+06	-2950.7	2663.15	2659.68	6.93258	6.31348	47.676	0.832103	9.37661
	17000	186756	7.83278e+06	-2945.95	2656.65	186762	7.83278e+06	-2950.1	2662.33	2659.49	5.67433	6.3941	41.5869	0.725828	8.54883
	17125	186925	7.83289e+06	-2942.99	2652.61	186929	7.83289e+06	-2945.69	2656.3	2654.46	3.68716	4.03366	42.4304	0.74055	5.46494
	17250	186783	7.83303e+06	-2941.43	2650.48	186783	7.83303e+06	-2941.43	2650.48	2650.48	0	0	0	0	0
	17375	186830	7.83315e+06	-2937.11	2644.59	186830	7.83315e+06	-2937.11	2644.59	2644.59	0	0	0	0	0
	17500	186816	7.83328e+06	-2932.73	2638.63	186819	7.83328e+06	-2934.29	2640.75	2639.69	2.12259	2.864	36.5432	0.637799	3.56481
	17625	186833	7.8334e+06	-2929.25	2633.9	186838	7.8334e+06	-2931.83	2637.41	2635.65	3.50692	4.47772	38.0678	0.664408	5.68757
	17750	186832	7.83353e+06	-2930.66	2635.82	186836	7.83353e+06	-2932.17	2637.87	2636.84	2.05311	3.6603	29.2886	0.511182	4.19679
	17875	186934	7.83364e+06	-2927.66	2631.74	186940	7.83364e+06	-2930.68	2635.84	2633.79	4.10309	6.13241	33.7858	0.589674	7.37847
	18000	186923	7.83377e+06	-2927.01	2630.86	186928	7.83377e+06	-2929.46	2634.19	2632.52	3.32762	4.49755	36.4967	0.636988	5.59473
	18125	186850	7.83391e+06	-2927.35	2631.32	186854	7.83391e+06	-2929.96	2634.87	2633.09	3.54543	4.23586	39.9295	0.696901	5.52382
	18250	186925	7.83402e+06	-2924.71	2627.74	186934	7.83402e+06	-2929.6	2634.38	2631.06	6.63922	8.58339	37.7218	0.65837	10.8514
	18375	187017	7.83414e+06	-2921.24	2623.03	187024	7.83414e+06	-2928.7	2633.15	2628.09	10.1211	6.47472	57.3918	1.00168	12.0149
	18500	187055	7.83426e+06	-2921.41	2623.26	187060	7.83426e+06	-2926.8	2630.57	2626.92	7.31052	4.67993	57.3741	1.00137	8.68017
	18625	186986	7.83439e+06	-2923.25	2625.76	186989	7.83439e+06	-2926.15	2629.69	2627.72	3.9341	3.07612	51.9777	0.907182	4.99396
	18750	187143	7.8345e+06	-2923.14	2625.61	187143	7.8345e+06	-2923.14	2625.61	2625.61	0	0	0	0	0
	18875	187210	7.83462e+06	-2921.58	2623.49	187213	7.83461e+06	-2924.12	2626.94	2625.21	3.44357	3.41974	45.1989	0.78887	4.85312
	19000	187309	7.83473e+06	-2922.01	2624.08	187309	7.83473e+06	-2922.01	2624.08	2624.08	0	0	0	0	0
HH	0	183428	7.81607e+06	-3031.14	2774.72	183445	7.81607e+06	-3040.91	2788.48	2781.6	13.7539	17.225	38.6069	0.673817	22.0424
	125	183462	7.8162e+06	-3034.66	2779.67	183481	7.81619e+06	-3045.92	2795.55	2787.61	15.8735	19.8682	38.6228	0.674095	25.4306
	250	183527	7.81631e+06	-3039.61	2786.64	183550	7.81631e+06	-3049.49	2800.59	2793.62	13.9475	23.438	30.756	0.536794	27.274
	375	183584	7.81643e+06	-3047.01	2797.09	183606	7.81643e+06	-3056.83	2810.98	2804.03	13.896	21.9545	32.3317	0.564295	25.9827
	500	183700	7.81654e+06	-3057.16	2811.45	183717	7.81654e+06	-3066.23	2824.33	2817.89	12.8755	17.3664	36.5534	0.637977	21.6187
	625	183705	7.81667e+06	-3057.61	2812.09	183734	7.81666e+06	-3076.57	2839.05	2825.57	26.9621	29.5294	42.3979	0.739983	39.9868
	750	183752	7.81679e+06	-3058.11	2812.8	183778	7.81678e+06	-3074.77	2836.48	2824.64	23.6864	26.302	42.0048	0.733121	35.3955
	875	183803	7.81691e+06	-3056.08	2809.92	183833	7.8169e+06	-3074.97	2836.77	2823.34	26.8489	30.3158	41.5294	0.724825	40.4958
	1000	183890	7.81702e+06	-3056.67	2810.76	183907	7.81702e+06	-3068.33	2827.31	2819.03	16.5565	16.6817	44.7841	0.78163	23.5032
	1125	183960	7.81714e+06	-3061.19	2817.17	183970	7.81714e+06	-3068.6	2827.7	2822.43	10.5299	9.3896	48.2764	0.842582	14.1083
	1250	184006	7.81726e+06	-3065.34	2823.06	184023	7.81726e+06	-3077.34	2840.15	2831.6	17.088	17.1146	44.9555	0.784622	24.1849
	1375	183911	7.8174e+06	-3055.94	2809.72	183929	7.81739e+06	-3066.64	2824.91	2817.31	15.1874	18.1131	39.979	0.697766	23.6377
	1500	184035	7.81751e+06	-3062.89	2819.58	184043	7.81751e+06	-3068.46	2827.5	2823.54	7.91719	7.55384	46.3454	0.80888	10.9427
	1625	183992	7.81764e+06	-3064.57	2821.97	184001	7.81764e+06	-3069.91	2829.56	2825.76	7.59412	8.63296	41.337	0.721466	11.4978
	1750	184006	7.81776e+06	-3068.98	2828.24	184017	7.81776e+06	-3075.21	2837.11	2832.67	8.87371	11.1745	38.4533	0.671136	14.2693
	1875	183970	7.81789e+06	-3067.62	2826.3	183975	7.81789e+06	-3069	2828.27	2827.28	1.9632	5.56676	19.426	0.339047	5.90279
	2000	183943	7.81802e+06	-3063.35	2820.23	183948	7.81802e+06	-3066.19	2824.27	2822.25	4.03559	4.70967	40.5924	0.708471	6.20218
	2125	183844	7.81816e+06	-3052.95	2805.49	183855	7.81816e+06	-3059.07	2814.16	2809.82	8.67177	11.4573	37.1213	0.647888	14.369
	2250	183882	7.81828e+06	-3051.04	2802.78	183896	7.81828e+06	-3060.74	2816.53	2809.66	13.7439	13.7854	44.9137	0.783892	19.4662
	2375	183879	7.81841e+06	-3056.21	2810.1	183879	7.81841e+06	-3056.21	2810.1	2810.1	0	0	0	0	0
	2500	183914	7.81853e+06	-3066.77	2825.09	183914	7.81853e+06	-3066.77	2825.09	2825.09	0	0	0	0	0
	2625	184001	7.81865e+06	-3070.57	2830.5	184021	7.81864e+06	-3082.21	2847.1	2838.8	16.6024	19.929	39.7969	0.694588	25.9385
	2750	184112	7.81876e+06	-3069.33	2828.73	184130	7.81876e+06	-3081.63	2846.27	2837.5	17.5387	18.536	43.4163	0.757758	25.5184
	2875	184141	7.81888e+06	-3073.66	2834.9	184166	7.81888e+06	-3089.88	2858.08	2846.49	23.1751	25.6273	42.1235	0.735194	34.552
	3000	184196	7.819e+06	-3077.79	2840.79	184213	7.819e+06	-3091.3	2860.11	2850.45	19.3203	16.8727	48.8688	0.852921	25.6508
	3125	184134	7.81913e+06	-3085.3	2851.52	184152	7.81913e+06	-3098.45	2870.37	2860.94	18.8498	18.3847	45.7156	0.797889	26.3308
	3250	184105	7.81926e+06	-3086.77	2853.62	184133	7.81926e+06	-3103.8	2878.06	2865.84	24.4383	27.5423	41.5826	0.725753	36.8213
	3375	184163	7.81938e+06	-3089.66	2857.76	184179	7.81938e+06	-3099.6	2872.02	2864.89	14.261	16.5998	40.6661	0.709758	21.8845
	3500	184127	7.81951e+06	-3092.91	2862.42	184142	7.81951e+06	-3103.06	2877	2869.71	14.578	15.0271	44.1309	0.77023	20.9363
	3625	184187	7.81963e+06	-3090.31	2858.69	184202	7.81963e+06	-3101.69	2875.03	2866.86	16.3342	15.6212	46.2782	0.807708	22.6015
	3750	184181	7.81976e+06	-3090.88	2859.51	184193	7.81976e+06	-3099.16	2871.39	2865.45	11.8809	12.0824	44.5181	0.776988	16.9452
	3875	184197	7.81988e+06	-3091.24	2860.02	184207	7.81988e+06	-3098.82	2870.9	2865.46	10.8765	9.722	48.208	0.841388	14.5882
	4000	184117	7.82002e+06	-3088.12	2855.56	184122	7.82002e+06	-3092.22	2861.43	2858.49	5.87391	5.24427	48.2413	0.841969	7.87434
	4125	184089	7.82015e+06	-3081.37	2845.9	184100	7.82015e+06	-3090.52	2858.99	2852.45	13.0911	10.9637	50.0541	0.873609	17.0757
	4250	184067	7.82028e+06	-3077.01	2839.68	184077	7.82028e+06	-3085.04	2851.15	2845.41	11.4705	9.57067	50.1593	0.875445	14.9389
	4375	184187	7.82039e+06	-3081.01	2845.39	184196	7.82039e+06	-3084.44	2850.29	2847.84	4.90229	8.9257	28.777	0.502254	10.1833
	4500	184216	7.82051e+06	-3074.31	2835.83	184232	7.82051e+06	-3080.28	2844.34	2840.09	8.51765	16.358	27.5062	0.480073	18.4427
	4625	184338	7.82062e+06	-3072.64	2833.45	184349	7.82062e+06	-3081.05	2845.44	2839.45	11.9972	11.2353	46.8783	0.818181	16.4366
	4750	184314	7.82075e+06	-3068.82	2828.01	184322	7.82075e+06	-3075.62	2837.69	2832.85	9.68598	7.97678	50.5272	0.881866	12.5478
	4875	184258	7.82088e+06	-3060.38	2816.02	184272	7.82088e+06	-3070.63	2830.59	2823.3	14.5685	14.1601	45.8146	0.799616	20.3162
	5000	184305	7.821e+06	-3058.03	2812.68	184326	7.821e+06	-3073.15	2834.17	2823.43	21.491	20.6844	46.0957	0.804521	29.8279
	5125	184331	7.82112e+06	-3062.39	2818.87	184356	7.82112e+06	-3081.25	2845.73	2832.3	26.8609	25.2837	46.7325	0.815636	36.8886
	5250	184341	7.82125e+06	-3065.06	2822.66	184363	7.82125e+06	-3081.79	2846.5	2834.58	23.8396	22.7633	46.3231	0.80849	32.962
	5375	184349	7.82137e+06	-3068.18	2827.1	184367	7.82137e+06	-3081.75	2846.44	2836.77	19.3463	18.4765	46.3174	0.808391	26.7519
	5500	184383	7.8215e+06	-3064.61	2822.02	184406	7.82149e+06	-3081.66	2846.32	2834.17	24.2933	24.0532	45.2846	0.790365	34.1866
	5625	184422	7.82162e+06	-3062.67	2819.27	184446	7.82161e+06	-3077.44	2840.29	2829.78	21.0238	24.0023	41.2153	0.719343	31.9079
	5750	184468	7.82174e+06	-3060.42	2816.07	184481	7.82174e+06	-3077.8	2840.8	2828.44	24.7314	13.0102	62.2529	1.08652	27.9447
	5875	184465	7.82186e+06	-3064.93	2822.48	184476	7.82186e+06	-3072.85	2833.75	2828.11	11.2692	10.3273	47.4973	0.828983	15.2855
	6000	184458	7.82199e+06	-3063.51	2820.46	184465	7.82199e+06	-3068.83	2828.02	2824.24	7.56306	6.94853	47.4249	0.82772	10.2704
	6125	184508	7.82211e+06	-3063.46	2820.39	184514	7.82211e+06	-3068.01	2826.86	2823.62	6.46749	5.8595	47.8237	0.834681	8.72709
	6250	184478	7.82224e+06	-3051.46	2803.38	184499	7.82224e+06	-3065.4	2823.15	2813.26	19.7679	21.0181	43.2443	0.754756	28.8536
	6375	184448	7.82237e+06	-3045.71	2795.25	184472	7.82237e+06	-3061.82	2818.06	2806.66	22.8105	24.7999	42.6073	0.743638	33.6951
	6500	184524	7.82249e+06	-3036.89	2782.81	184559	7.82248e+06	-3060.08	2815.59	2799.2	32.779	35.7114	42.5484	0.742609	48.4744
	6625	184569	7.82261e+06	-3038.23	2784.7	184588	7.8226e+06	-3051.88	2803.97	2794.34	19.2727	18.8796	45.5903	0.7957	26.9792
	6750	184594	7.82273e+06	-3041.69	2789.58	184610	7.82273e+06	-3052.87	2805.37	2797.47	15.7967	15.7216	45.1365	0.78778	22.2869
	6875	184551	7.82286e+06	-3032.23	2776.25	184580	7.82286e+06	-3051.12	2802.9	2789.58	26.6418	29.2565	42.3219	0.738656	39.5693
	7000	184553	7.82299e+06	-3031.98	2775.9	184569	7.82298e+06	-3041.71	2789.6	2782.75	13.7012	15.4202	41.6218	0.726438	20.6279
	7125	184557	7.82311e+06	-3025.75	2767.15	184575	7.82311e+06	-3034.93	2780.05	2773.6	12.8993	17.6393	36.1774	0.631415	21.8526
	7250	184637	7.82323e+06	-3024.91	2765.98	184652	7.82323e+06	-3035.13	2780.33	2773.15	14.3592	15.5716	42.6804	0.744913	21.1816
	7375	184659	7.82335e+06	-3024.72	2765.71	184678	7.82335e+06	-3035.18	2780.4	2773.06	14.696	18.9305	37.8227	0.660131	23.9653
	7500	184670	7.82348e+06	-3025.25	2766.45	184677	7.82347e+06	-3030.14	2773.32	2769.88	6.86526	6.94853	44.6546	0.77937	9.768
	7625	184713	7.8236e+06	-3030.18	2773.37	184719	7.8236e+06	-3033.72	2778.35	2775.86	4.97687	5.40552	42.6358	0.744135	7.34771
	7750	184643	7.82373e+06	-3025.76	2767.17	184659	7.82373e+06	-3034.01	2778.76	2772.96	11.5908	15.7031	36.4319	0.635856	19.5175
	7875	184741	7.82384e+06	-3023.58	2764.11	184758	7.82384e+06	-3032.14	2776.13	2770.12	12.0184	16.8516	35.496	0.619522	20.6982
	8000	184761	7.82397e+06	-3028.14	2770.51	184769	7.82397e+06	-3033.33	2777.8	2774.15	7.29369	8.15915	41.7944	0.72945	10.9439
	8125	184687	7.8241e+06	-3024.68	2765.65	184696	7.8241e+06	-3030.38	2773.65	2769.65	8.00201	8.75325	42.4328	0.740593	11.8597
	8250	184719	7.82423e+06	-3024.55	2765.47	184728	7.82422e+06	-3030.37	2773.64	2769.56	8.17029	9.50988	40.6671	0.709775	12.5376
	8375	184610	7.82437e+06	-3014.45	2751.33	184624	7.82436e+06	-3021.62	2761.36	2756.35	10.0344	13.4133	36.7998	0.642278	16.7513
	8500	184625	7.82449e+06	-3011.42	2747.1	184638	7.82449e+06	-3019.83	2758.86	2752.98	11.7604	13.4431	41.1805	0.718735	17.8613
	8625	184688	7.82461e+06	-3007.91	2742.2	184706	7.82461e+06	-3019.74	2758.73	2750.46	16.5331	18.9292	41.1346	0.717934	25.1329
	8750	184713	7.82473e+06	-3010.78	2746.2	184724	7.82473e+06	-3016.5	2754.19	2750.2	7.99356	11.0231	35.9482	0.627414	13.6164
	8875	184745	7.82485e+06	-3007.05	2741	184765	7.82485e+06	-3017.06	2754.98	2747.99	13.9814	19.3039	35.9151	0.626837	23.8353
	9000	184811	7.82497e+06	-3004.91	2738.01	184829	7.82497e+06	-3015.58	2752.91	2745.46	14.8944	18.8189	38.3603	0.669513	23.9999
	9125	184888	7.82509e+06	-3005.38	2738.67	184905	7.82508e+06	-3013.52	2750.03	2744.35	11.3598	17.669	32.7378	0.571382	21.0057
	9250	184870	7.82521e+06	-3006.4	2740.09	184886	7.82521e+06	-3017.33	2755.36	2747.72	15.2655	16.4287	42.8982	0.748715	22.4262
	9375	184887	7.82534e+06	-3005.15	2738.35	184898	7.82534e+06	-3013.25	2749.65	2744	11.303	11.2154	45.2229	0.789288	15.9231
	9500	184933	7.82546e+06	-3006.85	2740.72	184946	7.82546e+06	-3014.32	2751.15	2745.93	10.4287	12.8589	39.0423	0.681416	16.5562
	9625	185008	7.82557e+06	-3003.33	2735.81	185026	7.82557e+06	-3015.56	2752.88	2744.35	17.0675	18.3351	42.9494	0.749609	25.0495
	9750	185006	7.8257e+06	-3005.65	2739.05	185016	7.8257e+06	-3012.52	2748.63	2743.84	9.58627	10.2963	42.9549	0.749704	14.068
	9875	185048	7.82582e+06	-3005.54	2738.89	185064	7.82582e+06	-3015.04	2752.15	2745.52	13.2614	16.3989	38.9616	0.680008	21.09
	10000	185103	7.82594e+06	-3001.58	2733.38	185119	7.82594e+06	-3012.41	2748.48	2740.93	15.1016	15.8035	43.6989	0.762689	21.8588
	10125	185139	7.82606e+06	-3000.33	2731.64	185151	7.82606e+06	-3007.76	2741.99	2736.81	10.3505	12.395	39.8636	0.695751	16.1483
	10250	185168	7.82618e+06	-2999.81	2730.91	185182	7.82618e+06	-3004.47	2737.4	2734.16	6.4876	13.7867	25.2002	0.439827	15.2369
	10375	185208	7.8263e+06	-3001.28	2732.96	185220	7.8263e+06	-3008.63	2743.2	2738.08	10.2421	12.4545	39.4326	0.688228	16.125
	10500	185213	7.82643e+06	-3001.13	2732.75	185223	7.82643e+06	-3006.75	2740.58	2736.66	7.82875	10.1363	37.6806	0.65765	12.8076
	10625	185266	7.82655e+06	-3000.53	2731.91	185279	7.82655e+06	-3007.91	2742.2	2737.06	10.2814	13.3327	37.6373	0.656895	16.8365
	10750	185294	7.82667e+06	-2999.7	2730.76	185310	7.82667e+06	-3009.88	2744.95	2737.85	14.1849	16.358	40.9304	0.71437	21.6516
	10875	185320	7.82679e+06	-3002.23	2734.28	185333	7.82679e+06	-3011.06	2746.59	2740.44	12.3113	13.747	41.8464	0.730357	18.454
	11000	185332	7.82692e+06	-3001.43	2733.17	185348	7.82692e+06	-3011.74	2747.54	2740.35	14.3745	16.3593	41.3051	0.72091	21.7773
	11125	185333	7.82704e+06	-3000.8	2732.29	185347	7.82704e+06	-3009.92	2745	2738.65	12.7103	14.4614	41.3125	0.72104	19.2531
	11250	185357	7.82717e+06	-3003.15	2735.56	185365	7.82717e+06	-3008.49	2743.01	2739.28	7.44332	8.40101	41.541	0.725028	11.2241
	11375	185389	7.82729e+06	-3003.97	2736.7	185403	7.82729e+06	-3009.75	2744.76	2740.73	8.05939	14.4726	29.1122	0.508104	16.5653
	11500	185413	7.82741e+06	-3003.83	2736.51	185428	7.82741e+06	-3009.57	2744.51	2740.51	8.0032	14.6127	28.7089	0.501065	16.6608
	11625	185441	7.82753e+06	-3003.12	2735.52	185451	7.82753e+06	-3007.53	2741.67	2738.59	6.14601	10.1251	31.2581	0.545556	11.8445
	11750	185450	7.82766e+06	-3003.33	2735.81	185461	7.82766e+06	-3009.51	2744.43	2740.12	8.61589	11.7487	36.2543	0.632757	14.5694
	11875	185445	7.82779e+06	-3005.4	2738.7	185454	7.82779e+06	-3009.97	2745.07	2741.88	6.37395	9.06581	35.1101	0.612787	11.0823
	12000	185504	7.8279e+06	-3005.27	2738.52	185529	7.8279e+06	-3016.84	2754.67	2746.59	16.155	25.2341	32.6277	0.56946	29.9624
	12125	185515	7.82803e+06	-3009.69	2744.68	185529	7.82803e+06	-3017.91	2756.17	2750.42	11.4879	14.2096	38.954	0.679876	18.2725
	12250	185511	7.82816e+06	-3009.5	2744.41	185520	7.82815e+06	-3015.84	2753.27	2748.84	8.85717	9.67112	42.4846	0.741496	13.1141
	12375	185532	7.82828e+06	-3003.92	2736.63	185556	7.82828e+06	-3017.51	2755.61	2746.12	18.9734	24.2752	38.011	0.663418	30.8104
	12500	185593	7.8284e+06	-3003.81	2736.48	185609	7.8284e+06	-3011.94	2747.82	2742.15	11.3399	16.2873	34.8474	0.608202	19.8461
	12625	185634	7.82852e+06	-3002.45	2734.59	185654	7.82852e+06	-3012.3	2748.32	2741.46	13.7368	20.1709	34.2556	0.597874	24.4042
	12750	185713	7.82863e+06	-2999.94	2731.09	185733	7.82863e+06	-3009.86	2744.92	2738.01	13.8231	20.3209	34.2251	0.597341	24.5768
	12875	185738	7.82876e+06	-3000.21	2731.47	185750	7.82876e+06	-3006.52	2740.26	2735.86	8.78827	11.7699	36.7478	0.64137	14.6889
	13000	185762	7.82888e+06	-2999.47	2730.44	185772	7.82888e+06	-3005.86	2739.34	2734.89	8.89763	10.9736	39.0359	0.681306	14.1275
	13125	185867	7.82899e+06	-3000.29	2731.58	185875	7.82899e+06	-3005.35	2738.63	2735.1	7.04606	8.68384	39.0558	0.681653	11.1828
	13250	185846	7.82912e+06	-2998.04	2728.45	185859	7.82912e+06	-3004.58	2737.55	2733	9.10242	13.4629	34.063	0.594512	16.2513
	13375	185856	7.82925e+06	-3000.64	2732.07	185867	7.82924e+06	-3005.75	2739.18	2735.63	7.11656	11.5875	31.5565	0.550765	13.5984
	13500	185874	7.82937e+06	-3001.27	2732.94	185886	7.82937e+06	-3006.41	2740.1	2736.52	7.15987	11.6483	31.5778	0.551137	13.6728
	13625	185893	7.82949e+06	-2999.93	2731.08	185904	7.82949e+06	-3003.61	2736.2	2733.64	5.12263	11.1844	24.6085	0.4295	12.3017
	13750	185895	7.82962e+06	-3000.49	2731.86	185904	7.82962e+06	-3004.56	2737.53	2734.69	5.66693	8.56225	33.4986	0.584661	10.2677
	13875	185974	7.82973e+06	-2998.2	2728.67	185983	7.82973e+06	-3002.32	2734.41	2731.54	5.73226	9.15765	32.0446	0.559284	10.8038
	14000	186005	7.82986e+06	-2996.06	2725.7	186012	7.82986e+06	-2999.99	2731.16	2728.43	5.46387	7.61463	35.6613	0.622407	9.37211
	14125	186039	7.82998e+06	-2994.72	2723.84	186047	7.82998e+06	-2998.24	2728.73	2726.28	4.89135	7.3926	33.4908	0.584525	8.8643
	14250	186119	7.83009e+06	-2998.61	2729.24	186128	7.83009e+06	-3003.04	2735.41	2732.33	6.16472	8.55234	35.7849	0.624565	10.5426
	14375	186210	7.83021e+06	-2995.24	2724.56	186223	7.83021e+06	-3001.96	2733.91	2729.23	9.34457	13.2025	35.2904	0.615933	16.1749
	14500	186226	7.83033e+06	-2996.97	2726.96	186235	7.83033e+06	-3000.16	2731.4	2729.18	4.43584	9.28785	25.529	0.445564	10.2928
	14625	186235	7.83046e+06	-2995.82	2725.37	186252	7.83045e+06	-3006.49	2740.22	2732.79	14.8498	16.8628	41.368	0.722007	22.4694
	14750	186207	7.83059e+06	-2994.95	2724.16	186218	7.83058e+06	-3001.25	2732.92	2728.54	8.75909	11.5478	37.1805	0.648922	14.4939
	14875	186143	7.83072e+06	-2993.66	2722.37	186157	7.83072e+06	-2999.37	2730.3	2726.33	7.93463	14.0087	29.5275	0.515352	16.0998
	15000	186346	7.83082e+06	-2991.77	2719.74	186360	7.83082e+06	-2995.82	2725.37	2722.55	5.62283	14.846	20.7439	0.362049	15.8751
	15125	186335	7.83095e+06	-2990.56	2718.07	186344	7.83095e+06	-2994.29	2723.24	2720.65	5.1762	9.29776	29.1053	0.507984	10.6415
	15250	186329	7.83107e+06	-2990.31	2717.72	186335	7.83107e+06	-2993.21	2721.74	2719.73	4.02351	5.55684	35.9069	0.626694	6.86055
	15375	186400	7.83119e+06	-2989.42	2716.48	186408	7.83119e+06	-2994.34	2723.31	2719.9	6.82636	8.09836	40.1286	0.700376	10.5916
	15500	186439	7.83131e+06	-2989.94	2717.21	186443	7.83131e+06	-2992.54	2720.81	2719.01	3.60666	3.8625	43.0382	0.751159	5.28459
	15625	186444	7.83144e+06	-2988.57	2715.31	186449	7.83144e+06	-2990.58	2718.09	2716.7	2.78669	5.01232	29.0726	0.507413	5.7349
	15750	186515	7.83155e+06	-2982.81	2707.33	186530	7.83155e+06	-2989.63	2716.78	2712.05	9.44481	15.2193	31.8229	0.555414	17.9118
	15875	186514	7.83168e+06	-2980.36	2703.94	186530	7.83168e+06	-2992.63	2720.94	2712.44	16.9939	16.3692	46.0727	0.804121	23.5954
	16000	186539	7.8318e+06	-2981.74	2705.85	186546	7.8318e+06	-2985.65	2711.26	2708.56	5.4103	6.47472	39.8823	0.696077	8.43762
	16125	186525	7.83193e+06	-2980.31	2703.87	186529	7.83193e+06	-2983.21	2707.88	2705.88	4.01018	3.87242	46.0012	0.802873	5.57468
	16250	186483	7.83206e+06	-2978.04	2700.74	186489	7.83206e+06	-2981.38	2705.35	2703.05	4.61547	5.88924	38.0862	0.66473	7.48236
	16375	186542	7.83218e+06	-2973.35	2694.27	186547	7.83218e+06	-2975.6	2697.37	2695.82	3.10381	4.60922	33.956	0.592644	5.55684
	16500	186594	7.8323e+06	-2972.9	2693.64	186595	7.8323e+06	-2974.88	2696.38	2695.01	2.73082	1.80602	56.5215	0.986486	3.274
	16625	186646	7.83242e+06	-2971.62	2691.88	186650	7.83242e+06	-2976.23	2698.24	2695.06	6.35819	4.5286	54.5398	0.951898	7.80607
	16750	186692	7.83254e+06	-2965.9	2684	186711	7.83254e+06	-2978.03	2700.72	2692.36	16.719	19.2629	40.9559	0.714815	25.5065
	16875	186743	7.83266e+06	-2967.35	2686	186751	7.83266e+06	-2973.88	2695	2690.5	8.99635	8.33031	47.2014	0.82382	12.2608
	17000	186784	7.83278e+06	-2964.7	2682.35	186790	7.83278e+06	-2968.19	2687.16	2684.76	4.80146	5.37577	41.7702	0.729028	7.20784
	17125	186955	7.83288e+06	-2963.18	2680.26	186960	7.83288e+06	-2966.12	2684.31	2682.29	4.04236	4.3971	42.5931	0.743389	5.97287
	17250	186810	7.83303e+06	-2959.55	2675.28	186816	7.83303e+06	-2962.66	2679.55	2677.41	4.27103	5.71809	36.7573	0.641536	7.1371
	17375	186863	7.83315e+06	-2957.37	2672.29	186869	7.83315e+06	-2959.49	2675.2	2673.74	2.90884	5.24427	29.0158	0.506421	5.99698
	17500	186849	7.83328e+06	-2952.57	2665.71	186855	7.83328e+06	-2956.39	2670.94	2668.33	5.23446	5.74913	42.3172	0.738574	7.77509
	17625	186868	7.8334e+06	-2949.66	2661.73	186877	7.8334e+06	-2955.22	2669.34	2665.53	7.61353	9.49135	38.735	0.676053	12.1676
	17750	186864	7.83353e+06	-2946.73	2657.72	186873	7.83352e+06	-2951.08	2663.67	2660.7	5.94956	8.50146	34.9854	0.61061	10.3765
	17875	186966	7.83364e+06	-2944.51	2654.69	186980	7.83364e+06	-2951.36	2664.05	2659.37	9.36578	13.4034	34.9443	0.609894	16.3514
	18000	186943	7.83377e+06	-2941.04	2649.95	186957	7.83377e+06	-2951.41	2664.12	2657.04	14.1704	14.6537	44.0394	0.768633	20.3846
	18125	186876	7.8339e+06	-2941.57	2650.67	186885	7.8339e+06	-2946.55	2657.47	2654.07	6.80012	9.0572	36.8991	0.644011	11.3258
	18250	186949	7.83402e+06	-2939.29	2647.56	186960	7.83402e+06	-2946.57	2657.5	2652.53	9.93696	11.3767	41.1356	0.717951	15.1054
	18375	187031	7.83413e+06	-2937.4	2644.99	187036	7.83413e+06	-2943.73	2653.62	2649.31	8.63336	5.50727	57.466	1.00297	10.2404
	18500	187069	7.83426e+06	-2936.83	2644.21	187074	7.83426e+06	-2940.69	2649.47	2646.84	5.26137	5.13391	45.7025	0.797659	7.35112
	18625	187003	7.83439e+06	-2936.78	2644.14	187009	7.83439e+06	-2940.94	2649.81	2646.98	5.67048	6.71658	40.1727	0.701147	8.79015
	18750	187162	7.8345e+06	-2937.24	2644.77	187164	7.8345e+06	-2937.28	2644.83	2644.8	0.0544944	1.56285	1.99701	0.0348545	1.5638
	18875	187233	7.83461e+06	-2937.88	2645.64	187234	7.83461e+06	-2937.88	2645.64	2645.64	0	0.867006	0	0	0.867006
	19000	187325	7.83473e+06	-2936.53	2643.8	187325	7.83473e+06	-2936.53	2643.8	2643.8	0	0	0	0	0
HG	0	183468	7.81607e+06	-3054.3	2807.4	183481	7.81607e+06	-3061.77	2817.99	2812.69	10.5916	13.1702	38.8067	0.677304	16.9008
	125	183501	7.81619e+06	-3057.56	2812.02	183512	7.81619e+06	-3064.07	2821.26	2816.64	9.23876	10.7304	40.7281	0.710839	14.1597
	250	183569	7.81631e+06	-3064.14	2821.36	183577	7.81631e+06	-3069.09	2828.39	2824.87	7.03807	8.51138	39.5874	0.69093	11.0444
	375	183625	7.81643e+06	-3070.01	2829.7	183640	7.81642e+06	-3078.49	2841.79	2835.75	12.0869	15.2689	38.3652	0.669599	19.4739
	500	183732	7.81654e+06	-3076.9	2839.52	183748	7.81654e+06	-3086.4	2853.09	2846.31	13.5731	16.1161	40.1043	0.699952	21.0703
	625	183739	7.81666e+06	-3079.81	2843.67	183764	7.81666e+06	-3095.85	2866.64	2855.16	22.9626	24.9909	42.578	0.743126	33.9386
	750	183789	7.81678e+06	-3081.33	2845.84	183814	7.81678e+06	-3096.46	2867.51	2856.68	21.6673	24.6982	41.2599	0.720122	32.8553
	875	183838	7.8169e+06	-3078.86	2842.32	183862	7.8169e+06	-3094.57	2864.8	2853.56	22.4822	23.7704	43.4046	0.757553	32.7182
	1000	183922	7.81702e+06	-3080.32	2844.4	183930	7.81702e+06	-3086.54	2853.29	2848.85	8.89188	7.95825	48.1714	0.840749	11.9331
	1125	183982	7.81714e+06	-3078.62	2841.97	183994	7.81713e+06	-3087.66	2854.9	2848.44	12.922	11.4573	48.4383	0.845407	17.2699
	1250	184034	7.81726e+06	-3084.94	2851	184044	7.81725e+06	-3092.51	2861.85	2856.43	10.8402	10.7912	45.1298	0.787664	15.2958
	1375	183956	7.81739e+06	-3082.12	2846.97	183971	7.81739e+06	-3091.47	2860.35	2853.66	13.3809	14.4218	42.856	0.747978	19.6732
	1500	184064	7.8175e+06	-3086	2852.52	184070	7.8175e+06	-3091.22	2860	2856.26	7.47475	6.49455	49.0137	0.855451	9.90207
	1625	184028	7.81763e+06	-3086.49	2853.22	184040	7.81763e+06	-3093.37	2863.08	2858.15	9.85595	11.497	40.6054	0.708697	15.1433
	1750	184043	7.81776e+06	-3089.88	2858.08	184051	7.81776e+06	-3093.83	2863.74	2860.91	5.66207	8.04748	35.1296	0.613126	9.83977
	1875	184000	7.81789e+06	-3086.19	2852.79	184012	7.81789e+06	-3093.5	2863.26	2858.03	10.4717	12.0204	41.0611	0.716651	15.9419
	2000	183974	7.81802e+06	-3083.12	2848.4	183985	7.81802e+06	-3090.63	2859.15	2853.78	10.7479	11.688	42.6008	0.743524	15.8785
	2125	183874	7.81816e+06	-3072.75	2833.6	183892	7.81816e+06	-3084.34	2850.15	2841.88	16.5426	18.0325	42.5326	0.742334	24.471
	2250	183911	7.81828e+06	-3071.45	2831.75	183929	7.81828e+06	-3084.05	2849.73	2840.74	17.9796	17.9208	45.0938	0.787035	25.3854
	2375	183895	7.81841e+06	-3074.1	2835.53	183898	7.81841e+06	-3077.07	2839.76	2837.65	4.23509	3.22741	52.6902	0.919618	5.32468
	2500	183965	7.81852e+06	-3084.95	2851.02	183965	7.81852e+06	-3084.95	2851.02	2851.02	0	0	0	0	0
	2625	184039	7.81864e+06	-3091.29	2860.1	184039	7.81864e+06	-3091.29	2860.1	2860.1	0	0	0	0	0
	2750	184143	7.81875e+06	-3090.79	2859.38	184162	7.81875e+06	-3103.45	2877.56	2868.47	18.1779	19.6164	42.8203	0.747355	26.744
	2875	184176	7.81888e+06	-3096.51	2867.58	184200	7.81887e+06	-3111.9	2889.73	2878.66	22.148	23.8622	42.8662	0.748157	32.5567
	3000	184221	7.819e+06	-3097.97	2869.68	184260	7.81899e+06	-3129.33	2914.95	2892.31	45.2668	39.1919	49.114	0.857201	59.8756
	3125	184162	7.81913e+06	-3104.97	2879.75	184202	7.81912e+06	-3132.75	2919.91	2899.83	40.1658	40.1085	45.0409	0.786111	56.7625
	3250	184138	7.81926e+06	-3107.27	2883.06	184162	7.81926e+06	-3122.14	2904.53	2893.79	21.4714	24.0631	41.7424	0.728542	32.2499
	3375	184201	7.81938e+06	-3112.93	2891.22	184214	7.81937e+06	-3120.88	2902.71	2896.96	11.4874	13.2719	40.8775	0.713447	17.5529
	3500	184162	7.81951e+06	-3116.58	2896.49	184177	7.81951e+06	-3126.44	2910.76	2903.62	14.2681	14.6127	44.3163	0.773466	20.4233
	3625	184220	7.81963e+06	-3114.61	2893.64	184237	7.81962e+06	-3126.89	2911.41	2902.53	17.7657	16.8628	46.4936	0.811466	24.4944
	3750	184213	7.81975e+06	-3112.98	2891.29	184227	7.81975e+06	-3122.56	2905.14	2898.21	13.8465	13.9876	44.7095	0.780327	19.6819
	3875	184227	7.81988e+06	-3114.68	2893.74	184236	7.81988e+06	-3121.26	2903.26	2898.5	9.51101	8.43076	48.4455	0.845534	12.7097
	4000	184147	7.82001e+06	-3111.41	2889.02	184154	7.82001e+06	-3117.39	2897.66	2893.34	8.63393	7.64568	48.4739	0.846029	11.5326
	4125	184121	7.82014e+06	-3107.74	2883.73	184128	7.82014e+06	-3113.75	2892.4	2888.07	8.66714	7.20161	50.2765	0.87749	11.2687
	4250	184095	7.82027e+06	-3100.4	2873.17	184102	7.82027e+06	-3106.55	2882.02	2877.6	8.84849	7.33181	50.355	0.878861	11.4913
	4375	184212	7.82038e+06	-3099.58	2871.99	184226	7.82038e+06	-3109.99	2886.98	2879.49	14.984	13.9777	46.9899	0.820129	20.4913
	4500	184240	7.82051e+06	-3091.05	2859.75	184261	7.8205e+06	-3105.1	2879.93	2869.84	20.18	20.5231	44.517	0.776968	28.7824
	4625	184358	7.82062e+06	-3091.1	2859.82	184374	7.82061e+06	-3104.93	2879.69	2869.76	19.8636	15.5505	51.944	0.906593	25.2265
	4750	184341	7.82074e+06	-3091.79	2860.81	184348	7.82074e+06	-3096.29	2867.27	2864.04	6.45498	7.7957	39.6254	0.691593	10.1213
	4875	184289	7.82088e+06	-3086.79	2853.65	184301	7.82088e+06	-3094.28	2864.38	2859.02	10.7319	12.6356	40.3425	0.70411	16.578
	5000	184343	7.821e+06	-3087.22	2854.27	184357	7.82099e+06	-3096.46	2867.51	2860.89	13.2449	14.1997	43.0074	0.750621	19.418
	5125	184368	7.82112e+06	-3090.35	2858.75	184381	7.82112e+06	-3099.57	2871.98	2865.36	13.2294	12.364	46.9368	0.819202	18.1076
	5250	184380	7.82124e+06	-3093.61	2863.42	184402	7.82124e+06	-3110.52	2887.74	2875.58	24.3188	21.7139	48.2388	0.841926	32.6021
	5375	184382	7.82137e+06	-3092.97	2862.5	184403	7.82137e+06	-3107.96	2884.05	2873.28	21.5465	20.8456	45.9473	0.801931	29.9799
	5500	184422	7.82149e+06	-3092.85	2862.33	184445	7.82149e+06	-3109.3	2885.98	2874.16	23.6497	23.216	45.5303	0.794654	33.1405
	5625	184459	7.82161e+06	-3089.54	2857.59	184482	7.82161e+06	-3107.12	2882.84	2870.22	25.2521	22.8723	47.831	0.834809	34.0707
	5750	184490	7.82173e+06	-3089.8	2857.96	184500	7.82173e+06	-3103.08	2877.03	2867.49	19.064	9.94403	62.4529	1.09001	21.5016
	5875	184492	7.82186e+06	-3085.1	2851.23	184509	7.82186e+06	-3098.21	2870.02	2860.63	18.7911	17.1047	47.6899	0.832346	25.4102
	6000	184488	7.82199e+06	-3087.27	2854.34	184495	7.82199e+06	-3092.54	2861.89	2858.11	7.54948	7.16065	46.5141	0.811825	10.4053
	6125	184535	7.82211e+06	-3084.27	2850.05	184546	7.8221e+06	-3092.91	2862.42	2856.23	12.3719	11.1348	48.0126	0.837977	16.6448
	6250	184517	7.82223e+06	-3077.67	2840.62	184536	7.82223e+06	-3090.36	2858.76	2849.69	18.1446	19.1413	43.4687	0.758671	26.3745
	6375	184488	7.82236e+06	-3072.26	2832.91	184506	7.82236e+06	-3084.1	2849.8	2841.36	16.8974	18.2334	42.8222	0.747389	24.8592
	6500	184572	7.82248e+06	-3069.23	2828.59	184584	7.82248e+06	-3078.64	2842	2835.3	13.4111	11.6582	48.9997	0.855207	17.77
	6625	184598	7.8226e+06	-3061.74	2817.95	184616	7.8226e+06	-3076	2838.24	2828.09	20.2901	18.2446	48.0385	0.838431	27.2865
	6750	184630	7.82272e+06	-3067.64	2826.33	184646	7.82272e+06	-3077.73	2840.7	2833.52	14.3744	15.3297	43.158	0.75325	21.0149
	6875	184591	7.82286e+06	-3057.82	2812.39	184616	7.82285e+06	-3074.37	2835.91	2824.15	23.5274	25.6359	42.5442	0.742536	34.7956
	7000	184588	7.82298e+06	-3054.34	2807.45	184617	7.82298e+06	-3072.77	2833.63	2820.54	26.1784	29.2169	41.8605	0.730603	39.2293
	7125	184602	7.82311e+06	-3053.92	2806.86	184617	7.8231e+06	-3063.4	2820.3	2813.58	13.4443	15.0581	41.7594	0.728838	20.1865
	7250	184681	7.82322e+06	-3053.99	2806.96	184695	7.82322e+06	-3063.33	2820.2	2813.58	13.2457	13.9988	43.4167	0.757764	19.2722
	7375	184692	7.82335e+06	-3048.2	2798.77	184715	7.82334e+06	-3064.13	2821.34	2810.05	22.5732	22.6007	44.9651	0.78479	31.9428
	7500	184710	7.82347e+06	-3052.14	2804.34	184720	7.82347e+06	-3058.52	2813.38	2808.86	9.03818	9.94403	42.2679	0.737714	13.4377
	7625	184751	7.82359e+06	-3055.08	2808.5	184762	7.82359e+06	-3060.6	2816.33	2812.42	7.82624	10.9214	35.6253	0.621778	13.436
	7750	184690	7.82372e+06	-3050.54	2802.08	184703	7.82372e+06	-3057.5	2811.93	2807	9.85565	13.2223	36.7	0.640536	16.4913
	7875	184795	7.82384e+06	-3056.73	2810.84	184802	7.82384e+06	-3059.13	2814.24	2812.54	3.40281	7.3926	24.7166	0.431386	8.13816
	8000	184803	7.82396e+06	-3055.75	2809.45	184810	7.82396e+06	-3059.13	2814.24	2811.85	4.79153	6.90758	34.7476	0.606461	8.40675
	8125	184725	7.8241e+06	-3048.57	2799.29	184738	7.8241e+06	-3055.37	2808.91	2804.1	9.62267	12.6369	37.2884	0.650805	15.8835
	8250	184761	7.82422e+06	-3050.6	2802.16	184770	7.82422e+06	-3056.05	2809.88	2806.02	7.71568	8.90587	40.9043	0.713915	11.7833
	8375	184662	7.82436e+06	-3042.12	2790.18	184671	7.82436e+06	-3047.48	2797.75	2793.97	7.56726	10.0246	37.0479	0.646608	12.5601
	8500	184670	7.82448e+06	-3039.79	2786.9	184680	7.82448e+06	-3046.57	2796.46	2791.68	9.56697	10.8619	41.373	0.722095	14.4744
	8625	184734	7.8246e+06	-3036.78	2782.66	184751	7.8246e+06	-3047.57	2797.88	2790.27	15.2203	17.8415	40.467	0.706283	23.4516
	8750	184764	7.82472e+06	-3037.13	2783.15	184777	7.82472e+06	-3043.9	2792.69	2787.92	9.54456	13.04	36.2021	0.631846	16.1598
	8875	184799	7.82485e+06	-3035.72	2781.16	184812	7.82484e+06	-3043.22	2791.73	2786.45	10.5701	13.231	38.6211	0.674066	16.9348
	9000	184863	7.82496e+06	-3034.92	2780.04	184876	7.82496e+06	-3043	2791.42	2785.73	11.3857	13.4741	40.1979	0.701585	17.6405
	9125	184935	7.82508e+06	-3034.13	2778.93	184946	7.82508e+06	-3040.98	2788.58	2783.75	9.64803	11.3655	40.3276	0.703849	14.9083
	9250	184912	7.82521e+06	-3034.85	2779.94	184920	7.82521e+06	-3039.78	2786.88	2783.41	6.94322	7.4633	42.9325	0.749313	10.1936
	9375	184926	7.82533e+06	-3032.19	2776.2	184941	7.82533e+06	-3041.65	2789.52	2782.86	13.3214	14.5731	42.4307	0.740555	19.7442
	9500	184971	7.82545e+06	-3031.43	2775.13	184986	7.82545e+06	-3041.66	2789.53	2782.33	14.4039	15.2081	43.4443	0.758246	20.9466
	9625	185052	7.82557e+06	-3032.69	2776.9	185066	7.82557e+06	-3042.43	2790.62	2783.76	13.7185	14.614	43.1897	0.753802	20.0442
	9750	185049	7.8257e+06	-3034.46	2779.39	185062	7.82569e+06	-3043.4	2791.99	2785.69	12.5974	13.3935	43.2455	0.754777	18.387
	9875	185094	7.82582e+06	-3032.38	2776.47	185108	7.82581e+06	-3040.57	2788	2782.23	11.5313	14.129	39.2194	0.684508	18.2373
	10000	185141	7.82594e+06	-3028.12	2770.48	185157	7.82593e+06	-3039.15	2786	2778.24	15.5156	16.0863	43.9652	0.767338	22.3496
	10125	185183	7.82606e+06	-3027.38	2769.44	185194	7.82605e+06	-3033.02	2777.37	2773.4	7.92471	10.6287	36.7081	0.640678	13.2578
	10250	185214	7.82618e+06	-3027.01	2768.92	185223	7.82618e+06	-3032.15	2776.14	2772.53	7.2207	8.76316	39.4879	0.689195	11.3548
	10375	185255	7.8263e+06	-3029.39	2772.26	185265	7.8263e+06	-3035.72	2781.16	2776.71	8.90107	10.7304	39.6763	0.692483	13.9417
	10500	185260	7.82642e+06	-3027.32	2769.36	185283	7.82642e+06	-3037.51	2783.69	2776.52	14.3282	23.1961	31.7036	0.553332	27.2646
	10625	185312	7.82654e+06	-3027.85	2770.1	185323	7.82654e+06	-3034.68	2779.7	2774.9	9.60011	10.9723	41.1841	0.718797	14.5792
	10750	185340	7.82667e+06	-3031.58	2775.34	185352	7.82666e+06	-3036.87	2782.78	2779.06	7.44271	11.719	32.4196	0.565828	13.8827
	10875	185360	7.82679e+06	-3028.25	2770.66	185374	7.82679e+06	-3037.33	2783.43	2777.05	12.769	14.1389	42.0855	0.734531	19.0514
	11000	185375	7.82691e+06	-3029.14	2771.91	185387	7.82691e+06	-3036.85	2782.76	2777.33	10.8431	12.2338	41.5515	0.725211	16.3474
	11125	185377	7.82704e+06	-3028.96	2771.66	185390	7.82704e+06	-3035.84	2781.33	2776.5	9.67398	13.231	36.1728	0.631335	16.3904
	11250	185397	7.82716e+06	-3028.89	2771.56	185410	7.82716e+06	-3037.78	2784.07	2777.81	12.5041	13.9678	41.8352	0.730161	18.747
	11375	185439	7.82728e+06	-3032.14	2776.13	185445	7.82728e+06	-3034.77	2779.83	2777.98	3.69932	6.41393	29.9748	0.523159	7.40429
	11500	185471	7.8274e+06	-3032.69	2776.9	185478	7.8274e+06	-3034.43	2779.35	2778.13	2.44754	6.44497	20.7948	0.362937	6.89407
	11625	185490	7.82753e+06	-3029	2771.72	185502	7.82753e+06	-3034.76	2779.81	2775.76	8.09777	12.6058	32.716	0.571002	14.9827
	11750	185502	7.82765e+06	-3031.41	2775.1	185508	7.82765e+06	-3034.64	2779.64	2777.37	4.54263	6.75754	33.9102	0.591845	8.14248
	11875	185498	7.82778e+06	-3032.18	2776.18	185505	7.82778e+06	-3035.76	2781.22	2778.7	5.03643	7.08003	35.4264	0.618307	8.68864
	12000	185573	7.8279e+06	-3037.02	2782.99	185583	7.82789e+06	-3040.34	2787.67	2785.33	4.67784	9.63146	25.9051	0.452129	10.7073
	12125	185562	7.82802e+06	-3037.29	2783.38	185576	7.82802e+06	-3045.39	2794.8	2789.09	11.4227	14.0074	39.1964	0.684106	18.0745
	12250	185556	7.82815e+06	-3040.29	2787.6	185560	7.82815e+06	-3043.45	2792.06	2789.83	4.45704	4.6588	43.7321	0.763269	6.44745
	12375	185591	7.82827e+06	-3037.17	2783.21	185605	7.82827e+06	-3045.26	2794.61	2788.91	11.4081	14.4429	38.3045	0.66854	18.405
	12500	185658	7.82839e+06	-3036.41	2782.14	185665	7.82839e+06	-3039.83	2786.95	2784.54	4.81786	6.858	35.0887	0.612413	8.38116
	12625	185694	7.82851e+06	-3031.9	2775.79	185711	7.82851e+06	-3040.1	2787.33	2781.56	11.5436	16.7822	34.5221	0.602524	20.369
	12750	185776	7.82863e+06	-3033.07	2777.44	185784	7.82862e+06	-3037.12	2783.14	2780.29	5.69973	7.55514	37.0315	0.646322	9.46399
	12875	185793	7.82875e+06	-3030.21	2773.42	185802	7.82875e+06	-3035.18	2780.4	2776.91	6.989	9.16627	37.3244	0.651434	11.5268
	13000	185812	7.82887e+06	-3029.2	2772	185818	7.82887e+06	-3031.9	2775.79	2773.89	3.79418	6.07161	32.0014	0.55853	7.15963
	13125	185915	7.82899e+06	-3028.1	2770.45	185923	7.82898e+06	-3032.46	2776.58	2773.52	6.12635	7.98799	37.4862	0.654258	10.0668
	13250	185908	7.82911e+06	-3028.5	2771.01	185920	7.82911e+06	-3034.16	2778.97	2774.99	7.95575	11.6496	34.33	0.599171	14.107
	13375	185924	7.82924e+06	-3030.72	2774.13	185932	7.82924e+06	-3034.46	2779.39	2776.76	5.25914	8.47172	31.8315	0.555565	9.97139
	13500	185934	7.82936e+06	-3027.92	2770.2	185947	7.82936e+06	-3033.12	2777.51	2773.85	7.30723	13.231	28.9111	0.504594	15.1147
	13625	185949	7.82949e+06	-3026.69	2768.47	185961	7.82948e+06	-3031.69	2775.5	2771.98	7.02313	12.9594	28.4548	0.49663	14.7401
	13750	185953	7.82961e+06	-3026.86	2768.71	185961	7829610	-3030.28	2773.51	2771.11	4.80284	7.61334	32.2456	0.562792	9.00168
	13875	186029	7.82973e+06	-3023.01	2763.31	186039	7.82973e+06	-3027.64	2769.81	2766.56	6.49519	10.1859	32.5242	0.567655	12.0806
	14000	186056	7.82985e+06	-3022.52	2762.62	186061	7.82985e+06	-3024.35	2765.19	2763.91	2.56562	4.95284	27.3846	0.477952	5.5779
	14125	186090	7.82997e+06	-3021.52	2761.22	186094	7.82997e+06	-3023.44	2763.91	2762.57	2.69096	4.01383	33.8388	0.590598	4.8324
	14250	186162	7.83009e+06	-3021.51	2761.21	186172	7.83009e+06	-3026.45	2768.14	2764.67	6.92702	9.41934	36.3309	0.634094	11.6922
	14375	186251	7.8302e+06	-3021.93	2761.8	186259	7.8302e+06	-3027.16	2769.13	2765.46	7.33502	8.7942	39.8306	0.695176	11.4517
	14500	186265	7.83033e+06	-3021.54	2761.25	186276	7.83033e+06	-3028.6	2771.15	2766.2	9.90328	11.3456	41.1168	0.717623	15.0598
	14625	186276	7.83045e+06	-3022.47	2762.55	186283	7.83045e+06	-3025.76	2767.17	2764.86	4.61354	7.21153	32.6089	0.569133	8.56101
	14750	186253	7.83058e+06	-3020.56	2759.88	186261	7.83058e+06	-3025.02	2766.13	2763	6.25151	8.17898	37.3921	0.652615	10.2945
	14875	186205	7.83071e+06	-3019.56	2758.48	186215	7.83071e+06	-3023.05	2763.37	2760.92	4.88949	10.1971	25.6176	0.447112	11.3088
	15000	186410	7.83081e+06	-3018.73	2757.32	186416	7.83081e+06	-3022.8	2763.02	2760.17	5.70106	6.11258	43.005	0.750578	8.35857
	15125	186373	7.83094e+06	-3013.34	2749.78	186383	7.83094e+06	-3017.66	2755.82	2752.8	6.04079	10.0246	31.0729	0.542324	11.704
	15250	186365	7.83107e+06	-3011.73	2747.53	186375	7.83107e+06	-3017.64	2755.79	2751.66	8.26192	9.86341	39.9507	0.697271	12.8665
	15375	186434	7.83119e+06	-3009.72	2744.72	186449	7.83118e+06	-3019.8	2758.81	2751.77	14.0917	15.935	41.4872	0.724087	21.2721
	15500	186468	7.83131e+06	-3010.43	2745.71	186477	7.83131e+06	-3016.76	2754.56	2750.14	8.84589	9.00632	44.4851	0.776412	12.6239
	15625	186479	7.83143e+06	-3009.48	2744.39	186520	7831425	-3015.35	2752.59	2748.49	8.19988	41.9767	11.0532	0.192914	42.7701
	15750	186557	7.83155e+06	-3009.74	2744.75	186563	7.83155e+06	-3013.93	2750.6	2747.68	5.85195	6.57647	41.6637	0.727168	8.80314
	15875	186548	7.83168e+06	-3005.99	2739.52	186557	7.83168e+06	-3013.38	2749.83	2744.68	10.3139	9.87332	46.2503	0.80722	14.2779
	16000	186575	7.8318e+06	-3003.57	2736.15	186584	7.8318e+06	-3009.07	2743.81	2739.98	7.66761	9.10677	40.0963	0.699812	11.9049
	16125	186562	7.83193e+06	-3003.05	2735.42	186567	7.83193e+06	-3006.07	2739.63	2737.53	4.20777	4.91058	40.5926	0.708474	6.46677
	16250	186526	7.83206e+06	-3000.68	2732.12	186535	7.83206e+06	-3004.84	2737.92	2735.02	5.79269	8.58209	34.0184	0.593732	10.3541
	16375	186583	7.83218e+06	-2994.13	2723.02	186589	7.83218e+06	-2996.97	2726.96	2724.99	3.94521	5.62755	35.0325	0.611433	6.8727
	16500	186627	7.8323e+06	-2994.71	2723.82	186637	7.83229e+06	-3000.24	2731.51	2727.67	7.68694	10.6696	35.7709	0.62432	13.1503
	16625	186668	7.83242e+06	-2994.01	2722.85	186671	7.83242e+06	-2997.6	2727.84	2725.35	4.9875	3.5301	54.7096	0.954862	6.11038
	16750	186731	7.83253e+06	-2990.3	2717.7	186743	7.83253e+06	-2998.39	2728.94	2723.32	11.2338	12.8378	41.1878	0.718864	17.0589
	16875	186770	7.83266e+06	-2989.2	2716.18	186781	7.83265e+06	-2998.19	2728.66	2722.42	12.4809	11.1844	48.1358	0.840128	16.759
	17000	186821	7.83278e+06	-2988.8	2715.62	186828	7.83277e+06	-2992.91	2721.33	2718.48	5.70057	6.41523	41.6243	0.726481	8.58206
	17125	186988	7.83288e+06	-2985.07	2710.46	186994	7.83288e+06	-2989.03	2715.94	2713.2	5.48559	5.92029	42.8174	0.747305	8.07103
	17250	186850	7.83302e+06	-2981.09	2704.95	186852	7.83302e+06	-2982.37	2706.72	2705.84	1.76999	2.5204	35.0791	0.612246	3.07982
	17375	186900	7.83314e+06	-2976.81	2699.04	186904	7.83314e+06	-2979.06	2702.15	2700.59	3.10739	4.15524	36.79	0.642107	5.18863
	17500	186877	7.83327e+06	-2970.35	2690.13	186890	7.83327e+06	-2978.6	2701.51	2695.82	11.3806	13.3625	40.4206	0.705472	17.552
	17625	186903	7.83339e+06	-2970.17	2689.88	186911	7.83339e+06	-2975.1	2696.68	2693.28	6.79662	8.41093	38.9406	0.679642	10.8138
	17750	186902	7.83352e+06	-2966.31	2684.57	186915	7.83352e+06	-2972.71	2693.38	2688.98	8.814	12.5364	35.11	0.612784	15.3248
	17875	187010	7.83363e+06	-2966.93	2685.42	187019	7.83363e+06	-2970.84	2690.81	2688.11	5.38368	9.47022	29.6176	0.516924	10.8935
	18000	186978	7.83376e+06	-2965.72	2683.76	186982	7.83376e+06	-2969.25	2688.62	2686.19	4.85818	4.98258	44.2758	0.772758	6.95903
	18125	186918	7.8339e+06	-2964.76	2682.44	186926	7.8339e+06	-2969.42	2688.85	2685.64	6.41251	8.54113	36.8985	0.644	10.6804
	18250	186984	7.83401e+06	-2961.94	2678.56	186987	7.83401e+06	-2964.31	2681.82	2680.19	3.25698	3.72109	41.1949	0.718986	4.94514
	18375	187052	7.83413e+06	-2962.29	2679.04	187055	7.83413e+06	-2964.67	2682.31	2680.68	3.27111	2.27853	55.1404	0.962381	3.98646
	18500	187090	7.83425e+06	-2959.27	2674.9	187095	7.83425e+06	-2964.13	2681.57	2678.23	6.67568	5.16365	52.278	0.912423	8.43967
	18625	187037	7.83439e+06	-2958.43	2673.74	187046	7.83438e+06	-2963.76	2681.06	2677.4	7.31979	8.60192	40.3961	0.705044	11.2948
	18750	187191	7.83449e+06	-2959.79	2675.61	187192	7.83449e+06	-2961.06	2677.35	2676.48	1.74372	0.948947	61.4446	1.07241	1.98521
	18875	187262	7.83461e+06	-2960.21	2676.19	187265	7.83461e+06	-2961.57	2678.05	2677.12	1.86758	3.22744	30.0561	0.524579	3.72884
	19000	187361	7.83472e+06	-2960.55	2676.65	187361	7.83472e+06	-2960.55	2676.65	2676.65	0	0	0	0	0
HF	0	183525	7.81606e+06	-3086.44	2853.15	183544	7.81606e+06	-3097.57	2869.11	2861.13	15.9549	19.6264	39.1088	0.682577	25.2933
	125	183558	7.81618e+06	-3092.05	2861.19	183566	7.81618e+06	-3097.28	2868.69	2864.94	7.50363	8.60192	41.0988	0.71731	11.4148
	250	183625	7.8163e+06	-3097	2868.29	183637	7.8163e+06	-3103.35	2877.41	2872.85	9.12661	12.4756	36.1875	0.631591	15.4576
	375	183686	7.81642e+06	-3104.2	2878.64	183702	7.81642e+06	-3113.04	2891.38	2885.01	12.7397	15.904	38.6961	0.675374	20.3774
	500	183782	7.81653e+06	-3109.29	2885.97	183796	7.81653e+06	-3118.28	2898.95	2892.46	12.9772	13.9579	42.915	0.749007	19.0586
	625	183794	7.81666e+06	-3115.54	2894.99	183812	7.81665e+06	-3127.25	2911.93	2903.46	16.9446	18.2347	42.8998	0.748742	24.8922
	750	183845	7.81678e+06	-3115.87	2895.46	183868	7.81677e+06	-3129.9	2915.77	2905.62	20.3113	22.9133	41.5551	0.725273	30.6197
	875	183897	7.81689e+06	-3118.19	2898.82	183913	7.81689e+06	-3128.78	2914.15	2906.48	15.3341	16.0057	43.7723	0.763971	22.1657
	1000	183966	7.81701e+06	-3114.41	2893.35	183974	7.81701e+06	-3121.07	2902.98	2898.17	9.62594	8.50146	48.5496	0.847351	12.8426
	1125	184027	7.81713e+06	-3113.86	2892.56	184035	7.81713e+06	-3120.25	2901.79	2897.18	9.23369	8.09836	48.7478	0.850809	12.2819
	1250	184077	7.81725e+06	-3115.62	2895.1	184096	7.81725e+06	-3129.02	2914.5	2904.8	19.3957	19.1116	45.4228	0.792777	27.2295
	1375	184014	7.81738e+06	-3117.2	2897.38	184049	7.81738e+06	-3138.14	2927.75	2912.56	30.3609	35.6916	40.3861	0.70487	46.858
	1500	184104	7.8175e+06	-3118.21	2898.84	184115	7.8175e+06	-3127.72	2912.61	2905.73	13.768	11.8095	49.3786	0.861819	18.139
	1625	184090	7.81763e+06	-3123.82	2906.96	184100	7.81762e+06	-3129.45	2915.12	2911.04	8.16027	9.40943	40.9333	0.71442	12.455
	1750	184111	7.81775e+06	-3128.24	2913.37	184119	7.81775e+06	-3132.43	2919.45	2916.41	6.08022	7.51288	38.9835	0.68039	9.66501
	1875	184052	7.81788e+06	-3117.88	2898.37	184071	7.81788e+06	-3128.59	2913.87	2906.12	15.5066	19.1625	38.9804	0.680336	24.6507
	2000	184027	7.81801e+06	-3117.59	2897.95	184035	7.81801e+06	-3123.03	2905.82	2901.88	7.86906	8.45189	42.9548	0.749703	11.548
	2125	183928	7.81815e+06	-3108.62	2885	183939	7.81815e+06	-3115.57	2895.03	2890.02	10.0271	10.8011	42.8716	0.748251	14.7379
	2250	183959	7.81827e+06	-3105.81	2880.95	183976	7.81827e+06	-3117.52	2897.85	2889.4	16.8922	16.6606	45.3954	0.7923	23.726
	2375	183939	7.8184e+06	-3109.93	2886.89	183939	7.8184e+06	-3109.93	2886.89	2886.89	0	0	0	0	0
	2500	184048	7.81851e+06	-3115.89	2895.49	184057	7.81851e+06	-3118.95	2899.91	2897.7	4.42228	9.14644	25.8037	0.450359	10.1594
	2625	184094	7.81863e+06	-3123.21	2906.08	184112	7.81863e+06	-3133.31	2920.72	2913.4	14.6467	18.1032	38.9753	0.680247	23.2863
	2750	184192	7.81875e+06	-3123.65	2906.71	184206	7.81875e+06	-3133.62	2921.17	2913.94	14.4599	14.805	44.3244	0.773607	20.6949
	2875	184230	7.81887e+06	-3131.59	2918.23	184245	7.81887e+06	-3140.97	2931.86	2925.05	13.6372	14.5532	43.1389	0.752915	19.9442
	3000	184269	7.81899e+06	-3136.74	2925.71	184278	7.81899e+06	-3143.23	2935.16	2930.43	9.44661	8.10827	49.3596	0.861488	12.4492
	3125	184214	7.81912e+06	-3142.14	2933.57	184223	7.81912e+06	-3149.12	2943.75	2938.66	10.178	8.71358	49.4324	0.862758	13.3984
	3250	184198	7.81925e+06	-3144.39	2936.85	184213	7.81925e+06	-3153.77	2950.54	2943.69	13.6924	15.1685	42.0722	0.734299	20.4344
	3375	184267	7.81937e+06	-3152.57	2948.78	184273	7.81937e+06	-3156.08	2953.92	2951.35	5.13217	5.8595	41.2142	0.719324	7.78928
	3500	184216	7.8195e+06	-3153.56	2950.23	184227	7.8195e+06	-3160.47	2960.34	2955.29	10.112	10.2467	44.6211	0.778785	14.3961
	3625	184272	7.81962e+06	-3152.46	2948.62	184283	7.81962e+06	-3159.28	2958.6	2953.61	9.97675	11.3555	41.3019	0.720854	15.1157
	3750	184270	7.81975e+06	-3152.64	2948.89	184287	7.81974e+06	-3164.32	2965.99	2957.44	17.1003	17.0439	45.0947	0.78705	24.1436
	3875	184273	7.81987e+06	-3150.77	2946.15	184282	7.81987e+06	-3156.83	2955.01	2950.58	8.85921	8.86491	44.9816	0.785076	12.5328
	4000	184194	7.82001e+06	-3148.57	2942.94	184198	7.82001e+06	-3151.58	2947.34	2945.14	4.39521	4.17637	46.4625	0.810923	6.063
	4125	184166	7.82014e+06	-3145.9	2939.05	184171	7.82014e+06	-3148.97	2943.53	2941.29	4.4791	4.80021	43.0181	0.750807	6.56539
	4250	184144	7.82027e+06	-3141.42	2932.52	184147	7.82027e+06	-3144.29	2936.7	2934.61	4.18126	4.00391	46.2412	0.807061	5.78914
	4375	184268	7.82038e+06	-3141.91	2933.23	184274	7.82038e+06	-3145.63	2938.65	2935.94	5.42117	5.5258	44.4524	0.77584	7.74103
	4500	184309	7.8205e+06	-3138.88	2928.82	184314	7.8205e+06	-3141.62	2932.81	2930.82	3.98858	4.84117	39.4847	0.689138	6.27261
	4625	184408	7.82061e+06	-3135.55	2923.98	184421	7.82061e+06	-3145.13	2937.92	2930.95	13.9459	12.8787	47.2781	0.825159	18.9829
	4750	184386	7.82074e+06	-3131.2	2917.66	184394	7.82074e+06	-3137.19	2926.36	2922.01	8.70288	7.86641	47.89	0.835839	11.7312
	4875	184341	7.82087e+06	-3128.75	2914.11	184349	7.82087e+06	-3134.48	2922.42	2918.26	8.31833	7.74483	47.0448	0.821086	11.3656
	5000	184393	7.82099e+06	-3128.66	2913.98	184403	7.82099e+06	-3136.76	2925.74	2919.86	11.763	9.78279	50.2511	0.877047	15.2994
	5125	184424	7.82111e+06	-3131.94	2918.73	184435	7.82111e+06	-3140.57	2931.28	2925.01	12.5467	11.5776	47.3005	0.825549	17.0722
	5250	184433	7.82124e+06	-3133.53	2921.04	184454	7.82123e+06	-3148.89	2943.41	2932.23	22.3661	20.8866	46.9592	0.819592	30.6021
	5375	184440	7.82136e+06	-3134.47	2922.41	184464	7.82136e+06	-3152.24	2948.3	2935.36	25.8929	24.8098	46.2237	0.806756	35.8604
	5500	184478	7.82148e+06	-3132.57	2919.65	184502	7.82148e+06	-3150.22	2945.35	2932.5	25.7021	24.9202	45.8849	0.800843	35.7997
	5625	184514	7.8216e+06	-3132.23	2919.16	184534	7.8216e+06	-3147.84	2941.88	2930.52	22.7217	20.3011	48.2203	0.841603	30.4698
	5750	184521	7.82173e+06	-3131.44	2918.01	184535	7.82173e+06	-3144.81	2937.46	2927.73	19.4495	14.0794	54.0993	0.94421	24.0107
	5875	184549	7.82185e+06	-3129.22	2914.79	184563	7.82185e+06	-3140.07	2930.55	2922.67	15.7662	14.1501	48.0921	0.839366	21.1849
	6000	184541	7.82198e+06	-3126.43	2910.74	184552	7.82198e+06	-3134.53	2922.5	2916.62	11.7547	11.0119	46.8685	0.81801	16.107
	6125	184588	7.8221e+06	-3125.92	2910	184597	7.8221e+06	-3132.67	2919.79	2914.9	9.79188	8.69375	48.3996	0.844733	13.0944
	6250	184583	7.82223e+06	-3121.69	2903.88	184592	7.82222e+06	-3128.02	2913.05	2908.46	9.16969	9.53963	43.8672	0.765628	13.2321
	6375	184554	7.82236e+06	-3115.53	2894.97	184564	7.82235e+06	-3121.81	2904.05	2899.51	9.0794	9.68104	43.1632	0.75334	13.2725
	6500	184629	7.82247e+06	-3115.33	2894.68	184634	7.82247e+06	-3119.96	2901.37	2898.03	6.69171	5.728	49.437	0.862838	8.80846
	6625	184654	7.82259e+06	-3108.08	2884.22	184669	7.82259e+06	-3120.05	2901.5	2892.86	17.2805	14.7343	49.5472	0.864761	22.7093
	6750	184692	7.82272e+06	-3112.16	2890.11	184698	7.82272e+06	-3116.09	2895.78	2892.94	5.67364	5.5258	45.7563	0.798598	7.91989
	6875	184658	7.82285e+06	-3101.66	2874.98	184676	7.82284e+06	-3113.76	2892.42	2883.7	17.4328	18.7481	42.9179	0.749059	25.6007
	7000	184659	7.82297e+06	-3099.05	2871.23	184675	7.82297e+06	-3109.61	2886.43	2878.83	15.1976	16.7313	42.25	0.737401	22.6032
	7125	184664	7.8231e+06	-3093.74	2863.61	184674	7.8231e+06	-3099.14	2871.36	2867.49	7.75194	9.89315	38.081	0.664639	12.5685
	7250	184750	7.82321e+06	-3100.51	2873.33	184754	7.82321e+06	-3102.74	2876.54	2874.93	3.20658	3.33781	43.8512	0.765348	4.62851
	7375	184755	7.82334e+06	-3092.39	2861.67	184773	7.82334e+06	-3104.05	2878.42	2870.05	16.748	18.314	42.4426	0.740764	24.8173
	7500	184779	7.82346e+06	-3096.78	2867.97	184785	7.82346e+06	-3100.06	2872.68	2870.33	4.71157	6.64588	35.3346	0.616705	8.14657
	7625	184819	7.82358e+06	-3099.8	2872.31	184824	7.82358e+06	-3103.19	2877.18	2874.75	4.87437	5.58789	41.0985	0.717305	7.41512
	7750	184775	7.82371e+06	-3095.35	2865.92	184787	7.82371e+06	-3101.73	2875.08	2870.5	9.16493	12.8986	35.3953	0.617764	15.8231
	7875	184860	7.82383e+06	-3098.66	2870.67	184869	7.82383e+06	-3103.44	2877.54	2874.11	6.87203	8.37127	39.3828	0.68736	10.8306
	8000	184873	7.82395e+06	-3101.82	2875.21	184878	7.82395e+06	-3105.06	2879.87	2877.54	4.66159	5.11408	42.3498	0.739144	6.91984
	8125	184801	7.82409e+06	-3094.88	2865.24	184808	7.82409e+06	-3099.18	2871.42	2868.33	6.174	7.29215	40.2534	0.702555	9.55478
	8250	184835	7.82421e+06	-3096.13	2867.04	184841	7.82421e+06	-3099.38	2871.71	2869.37	4.66748	6.24277	36.7841	0.642003	7.79472
	8375	184746	7.82435e+06	-3087.42	2854.55	184755	7.82435e+06	-3092.45	2861.76	2858.16	7.20574	9.88324	36.0953	0.629982	12.2312
	8500	184742	7.82447e+06	-3085.34	2851.58	184747	7.82447e+06	-3088.36	2855.9	2853.74	4.32203	5.45639	38.3829	0.669907	6.96076
	8625	184811	7.82459e+06	-3084.26	2850.03	184819	7.82459e+06	-3089.09	2856.94	2853.49	6.91199	7.9867	40.8742	0.713389	10.5623
	8750	184846	7.82471e+06	-3080.35	2844.44	184861	7.82471e+06	-3087.87	2855.2	2849.82	10.7527	14.5024	36.5548	0.638001	18.0538
	8875	184878	7.82483e+06	-3081.13	2845.56	184889	7.82483e+06	-3087.36	2854.47	2850.01	8.90851	10.9835	39.0449	0.681462	14.1421
	9000	184937	7.82495e+06	-3079.69	2843.5	184947	7.82495e+06	-3084.97	2851.05	2847.28	7.54542	9.88324	37.3601	0.652058	12.4343
	9125	185002	7.82507e+06	-3078.5	2841.8	185009	7.82507e+06	-3083.34	2848.72	2845.26	6.9135	7.75604	41.7128	0.728026	10.39
	9250	184975	7.8252e+06	-3076.24	2838.58	184982	7.8252e+06	-3081.25	2845.73	2842.15	7.15132	7.61463	43.2028	0.754031	10.4462
	9375	184992	7.82532e+06	-3076.07	2838.34	185003	7.82532e+06	-3083.78	2849.35	2843.84	11.0095	11.4659	43.8366	0.765094	15.8958
	9500	185033	7.82544e+06	-3075.55	2837.6	185046	7.82544e+06	-3085.04	2851.15	2844.37	13.5529	13.2111	45.7315	0.798166	18.9266
	9625	185119	7.82556e+06	-3077.83	2840.85	185131	7.82556e+06	-3085.66	2852.03	2846.44	11.1874	11.7388	43.6222	0.761351	16.216
	9750	185112	7.82569e+06	-3076.64	2839.15	185125	7.82569e+06	-3084.91	2850.96	2845.06	11.8124	12.8179	42.6621	0.744595	17.4308
	9875	185169	7.82581e+06	-3076.37	2838.76	185180	7.8258e+06	-3083.01	2848.25	2843.5	9.48088	11.4659	39.5865	0.690914	14.878
	10000	185207	7.82593e+06	-3073.32	2834.42	185218	7.82593e+06	-3080.9	2845.23	2839.82	10.8141	11.0641	44.3452	0.773969	15.4712
	10125	185252	7.82605e+06	-3068.52	2827.58	185265	7.82604e+06	-3076.73	2839.28	2833.43	11.6959	13.6962	40.4959	0.706786	18.0105
	10250	185286	7.82617e+06	-3069.69	2829.25	185299	7.82617e+06	-3076.96	2839.61	2834.43	10.3591	12.4148	39.8422	0.695377	16.1691
	10375	185323	7.82629e+06	-3069.93	2829.59	185338	7.82629e+06	-3078.88	2842.35	2835.97	12.7574	15.1473	40.1049	0.699962	19.8039
	10500	185339	7.82641e+06	-3071.24	2831.45	185357	7.82641e+06	-3081.79	2846.5	2838.98	15.0483	18.8896	38.5425	0.672694	24.1509
	10625	185378	7.82653e+06	-3069	2828.27	185394	7.82653e+06	-3078.75	2842.16	2835.21	13.8954	15.6522	41.5974	0.726012	20.9302
	10750	185402	7.82666e+06	-3071.44	2831.74	185410	7.82666e+06	-3076.92	2839.55	2835.64	7.8107	8.08844	43.9992	0.767931	11.2441
	10875	185428	7.82678e+06	-3072.63	2833.43	185444	7.82678e+06	-3082.78	2847.92	2840.68	14.4833	15.8035	42.5041	0.741836	21.4364
	11000	185440	7.8269e+06	-3070.14	2829.89	185450	7.8269e+06	-3076.99	2839.65	2834.77	9.76143	10.8705	41.923	0.731694	14.6101
	11125	185446	7.82703e+06	-3073.09	2834.09	185459	7.82703e+06	-3081.29	2845.79	2839.94	11.6989	12.8887	42.2297	0.737047	17.4064
	11250	185467	7.82715e+06	-3074.41	2835.97	185474	7.82715e+06	-3078.75	2842.16	2839.07	6.19063	6.80712	42.2845	0.738003	9.20113
	11375	185514	7.82727e+06	-3074.23	2835.71	185522	7.82727e+06	-3077.03	2839.71	2837.71	3.99273	7.28223	28.7353	0.501525	8.30499
	11500	185555	7.82739e+06	-3074.27	2835.77	185563	7.82739e+06	-3077.74	2840.72	2838.24	4.94874	8.37127	30.5898	0.533892	9.72461
	11625	185574	7.82752e+06	-3073.57	2834.77	185581	7.82752e+06	-3077.31	2840.11	2837.44	5.33282	7.11969	36.8341	0.642877	8.89545
	11750	185577	7.82764e+06	-3073.02	2833.99	185583	7.82764e+06	-3075.14	2837.01	2835.5	3.02156	6.81704	23.9047	0.417215	7.45666
	11875	185581	7.82777e+06	-3074.32	2835.84	185588	7.82777e+06	-3077.88	2840.92	2838.38	5.07724	7.04899	35.7645	0.624208	8.68715
	12000	185663	7.82788e+06	-3078.43	2841.7	185671	7.82788e+06	-3081.41	2845.96	2843.83	4.25529	8.48163	26.6432	0.465012	9.48923
	12125	185644	7.82801e+06	-3084.7	2850.66	185651	7.82801e+06	-3088.8	2856.53	2853.6	5.86746	7.08994	39.6103	0.691331	9.20296
	12250	185622	7.82814e+06	-3085.62	2851.98	185626	7.82814e+06	-3088.33	2855.86	2853.92	3.87853	4.56826	40.3318	0.703923	5.99266
	12375	185675	7.82826e+06	-3084.68	2850.63	185680	7.82826e+06	-3087.34	2854.44	2852.54	3.80579	4.74072	38.7571	0.676439	6.07935
	12500	185745	7.82838e+06	-3080.3	2844.37	185754	7.82838e+06	-3084.35	2850.16	2847.27	5.78767	9.4603	31.4577	0.54904	11.0903
	12625	185787	7.8285e+06	-3077.68	2840.63	185797	7.8285e+06	-3082.9	2848.09	2844.36	7.45478	10.3782	35.6902	0.622911	12.7781
	12750	185856	7.82862e+06	-3075.9	2838.09	185867	7.82861e+06	-3081.05	2845.44	2841.77	7.35051	10.9934	33.7679	0.58936	13.2244
	12875	185876	7.82874e+06	-3075.25	2837.17	185882	7.82874e+06	-3078.05	2841.16	2839.16	3.99405	6.61613	31.1187	0.543123	7.72823
	13000	185890	7.82886e+06	-3074.25	2835.74	185890	7.82886e+06	-3075.19	2837.08	2836.41	1.34002	0.111803	85.2306	1.48756	1.34468
	13125	185996	7.82898e+06	-3074.53	2836.14	185997	7.82897e+06	-3075.98	2838.21	2837.17	2.06742	1.5331	53.441	0.932722	2.57383
	13250	186001	7.8291e+06	-3073.98	2835.36	186007	7.8291e+06	-3076.55	2839.02	2837.19	3.66433	6.17207	30.6974	0.535771	7.17786
	13375	186021	7.82922e+06	-3073.96	2835.33	186025	7.82922e+06	-3075.77	2837.91	2836.62	2.58038	4.16515	31.7789	0.554646	4.89968
	13500	186035	7.82935e+06	-3074.4	2835.96	186042	7.82935e+06	-3077.42	2840.26	2838.11	4.30684	7.4633	29.9879	0.523387	8.61683
	13625	186043	7.82947e+06	-3071.75	2832.18	186052	7.82947e+06	-3076.38	2838.78	2835.48	6.59894	9.62154	34.4443	0.601166	11.6671
	13750	186049	7.8296e+06	-3070.41	2830.27	186059	7.8296e+06	-3074.71	2836.4	2833.33	6.12563	9.5905	32.5671	0.568403	11.3799
	13875	186119	7.82972e+06	-3068.22	2827.16	186128	7.82971e+06	-3072.95	2833.89	2830.52	6.7339	9.30897	35.8811	0.626243	11.4892
	14000	186140	7.82984e+06	-3066.18	2824.25	186145	7.82984e+06	-3069.16	2828.49	2826.37	4.2385	5.77888	36.2581	0.632823	7.16661
	14125	186172	7.82996e+06	-3064.87	2822.39	186175	7.82996e+06	-3066.75	2825.06	2823.73	2.67235	3.56976	36.8188	0.642609	4.45922
	14250	186234	7.83008e+06	-3062.55	2819.1	186243	7.83008e+06	-3068.23	2827.17	2823.13	8.0728	9.49996	40.357	0.704362	12.4667
	14375	186316	7.83019e+06	-3064.27	2821.54	186325	7.83019e+06	-3069.32	2828.72	2825.13	7.18067	8.70367	39.5232	0.68981	11.2834
	14500	186332	7.83032e+06	-3063.9	2821.01	186341	7.83032e+06	-3069.06	2828.35	2824.68	7.33633	8.74463	39.9951	0.698046	11.4145
	14625	186338	7.83044e+06	-3063.06	2819.82	186349	7.83044e+06	-3069.72	2829.29	2824.56	9.46871	10.2665	42.6851	0.744995	13.9663
	14750	186327	7.83057e+06	-3061.34	2817.38	186340	7.83057e+06	-3068.5	2827.55	2822.47	10.1747	13.1206	37.7928	0.659609	16.6035
	14875	186305	7.8307e+06	-3061.27	2817.28	186315	7.8307e+06	-3064.35	2821.65	2819.47	4.37385	9.9242	23.7843	0.415115	10.8453
	15000	186467	7.8308e+06	-3057.51	2811.95	186476	7.8308e+06	-3062.24	2818.66	2815.3	6.71061	8.70237	37.6367	0.656884	10.9892
	15125	186444	7.83093e+06	-3056	2809.81	186449	7.83093e+06	-3059.26	2814.43	2812.12	4.6217	5.46631	40.2142	0.70187	7.15826
	15250	186436	7.83106e+06	-3055.07	2808.49	186441	7.83106e+06	-3058.04	2812.7	2810.59	4.2091	4.88083	40.7736	0.711634	6.44508
	15375	186497	7.83118e+06	-3051.23	2803.05	186514	7.83118e+06	-3062.72	2819.34	2811.2	16.2859	17.4172	43.0775	0.751843	23.8452
	15500	186529	7.8313e+06	-3053.81	2806.7	186533	7.8313e+06	-3056.57	2810.61	2808.66	3.90976	3.92329	44.901	0.783671	5.53881
	15625	186545	7.83142e+06	-3053.38	2806.1	186551	7.83142e+06	-3055.59	2809.22	2807.66	3.12992	6.29365	26.4418	0.461497	7.02897
	15750	186620	7.83154e+06	-3050.27	2801.69	186623	7.83154e+06	-3052.89	2805.4	2803.55	3.70709	3.29815	48.3409	0.843708	4.96189
	15875	186607	7.83167e+06	-3047.6	2797.92	186615	7.83167e+06	-3053.11	2805.71	2801.82	7.7931	8.64288	42.0403	0.733742	11.6375
	16000	186642	7.83179e+06	-3044.16	2793.06	186649	7.83179e+06	-3048.39	2799.04	2796.05	5.97479	6.99941	40.4845	0.706588	9.20271
	16125	186627	7.83192e+06	-3040.93	2788.5	186639	7.83192e+06	-3047.5	2797.78	2793.14	9.27377	11.4672	38.9632	0.680036	14.7479
	16250	186603	7.83205e+06	-3039.87	2787.01	186616	7.83205e+06	-3046.42	2796.25	2791.63	9.24232	12.8688	35.6857	0.622833	15.8438
	16375	186656	7.83217e+06	-3035.95	2781.49	186666	7.83217e+06	-3042.26	2790.38	2785.93	8.89195	10.9524	39.0721	0.681936	14.1075
	16500	186692	7.83229e+06	-3033.39	2777.89	186703	7.83229e+06	-3039.79	2786.9	2782.39	9.01138	10.7007	40.1018	0.699909	13.9896
	16625	186732	7.83241e+06	-3034.51	2779.46	186734	7.83241e+06	-3037.01	2782.98	2781.22	3.51911	2.65189	52.9996	0.925017	4.40643
	16750	186793	7.83253e+06	-3029.72	2772.73	186814	7.83252e+06	-3043.08	2791.54	2782.13	18.8101	21.2103	41.5677	0.725494	28.3496
	16875	186819	7.83265e+06	-3028.48	2770.99	186832	7.83265e+06	-3039.22	2786.09	2778.54	15.1087	13.3625	48.5097	0.846654	20.17
	17000	186877	7.83277e+06	-3025.33	2766.56	186889	7.83277e+06	-3033.12	2777.51	2772.04	10.9422	12.0005	42.3588	0.7393	16.2402
	17125	187048	7.83287e+06	-3025.5	2766.8	187053	7.83287e+06	-3029.02	2771.74	2769.27	4.94116	5.2641	43.1875	0.753764	7.21982
	17250	186921	7.83301e+06	-3020.29	2759.5	186927	7.83301e+06	-3023.35	2763.79	2761.64	4.28778	5.62755	37.3048	0.651091	7.07491
	17375	186962	7.83313e+06	-3013.83	2750.46	186971	7.83313e+06	-3019.11	2757.85	2754.15	7.38554	8.56225	40.7801	0.711746	11.3075
	17500	186945	7.83326e+06	-3011.99	2747.89	186951	7.83326e+06	-3016.02	2753.52	2750.71	5.6325	6.87783	39.3153	0.686182	8.88986
	17625	186968	7.83339e+06	-3008.7	2743.3	186979	7.83338e+06	-3015.17	2752.33	2747.82	9.0366	10.811	39.8912	0.696232	14.0904
	17750	186979	7.83351e+06	-3005.97	2739.49	186991	7.83351e+06	-3011.92	2747.79	2743.64	8.30214	11.6384	35.5019	0.619624	14.2961
	17875	187082	7.83362e+06	-3005.54	2738.89	187090	7.83362e+06	-3010.07	2745.21	2742.05	6.31841	8.52259	36.5522	0.637956	10.6093
	18000	187039	7.83376e+06	-3002.96	2735.3	187050	7.83375e+06	-3008.85	2743.51	2739.4	8.21019	11.0939	36.5039	0.637113	13.8015
	18125	186988	7.83389e+06	-3002.87	2735.17	186992	7.83389e+06	-3005.65	2739.05	2737.11	3.87299	3.94312	44.486	0.776426	5.52705
	18250	187043	7.83401e+06	-3000.08	2731.29	187056	7.83401e+06	-3008.64	2743.21	2737.25	11.9259	13.3823	41.7064	0.727914	17.9252
	18375	187085	7.83413e+06	-2999.58	2730.59	187092	7.83413e+06	-3007.84	2742.1	2736.35	11.5054	7.17056	58.0675	1.01347	13.557
	18500	187129	7.83425e+06	-2995.76	2725.28	187141	7.83425e+06	-3007.04	2740.98	2733.13	15.7001	11.9919	52.6269	0.918513	19.7559
	18625	187098	7.83438e+06	-2996.69	2726.58	187109	7.83438e+06	-3003.18	2735.6	2731.09	9.02873	10.4786	40.7492	0.711209	13.8318
	18750	187240	7.83449e+06	-2996.24	2725.95	187242	7.83449e+06	-2998.33	2728.85	2727.4	2.90501	2.11858	53.8972	0.940684	3.59548
	18875	187312	7834602	-2996.19	2725.88	187314	7.8346e+06	-2997.92	2728.28	2727.08	2.40444	1.37186	60.293	1.05231	2.76827
	19000	187418	7.83471e+06	-2996.57	2726.41	187418	7.83471e+06	-2996.57	2726.41	2726.41	0	0	0	0	0
HE	0	183609	7.81605e+06	-3134.43	2922.35	183639	7.81605e+06	-3151.79	2947.64	2935	25.2935	30.6086	39.5688	0.690606	39.707
	125	183638	7.81617e+06	-3141.34	2932.4	183650	7.81617e+06	-3148.61	2943	2937.7	10.5986	11.982	41.4943	0.724212	15.9968
	250	183711	7.81629e+06	-3147.68	2941.64	183723	7.81629e+06	-3154.59	2951.74	2946.69	10.0934	11.8604	40.3982	0.705082	15.5739
	375	183779	7.81641e+06	-3156.41	2954.4	183788	7.8164e+06	-3162	2962.59	2958.49	8.186	8.36135	44.3929	0.774801	11.7014
	500	183861	7.81652e+06	-3160.65	2960.61	183871	7.81652e+06	-3166.94	2969.83	2965.22	9.22435	9.76166	43.3789	0.757105	13.4305
	625	183870	7.81665e+06	-3164.39	2966.09	183889	7.81664e+06	-3172.78	2978.41	2972.25	12.3225	19.9277	31.731	0.55381	23.4299
	750	183920	7.81677e+06	-3162.27	2962.98	183952	7.81676e+06	-3181.91	2991.86	2977.42	28.8772	32.061	42.0092	0.733198	43.1486
	875	183966	7.81689e+06	-3164.23	2965.86	183993	7.81688e+06	-3181.84	2991.76	2978.81	25.9001	26.6344	44.1992	0.771421	37.1511
	1000	184024	7.817e+06	-3160.88	2960.94	184039	7.817e+06	-3169.14	2973.06	2967	12.118	15.1077	38.7334	0.676025	19.3672
	1125	184091	7.81712e+06	-3164.85	2966.76	184099	7.81712e+06	-3167.64	2970.86	2968.81	4.09471	7.95695	27.2307	0.475265	8.94872
	1250	184157	7.81724e+06	-3171.84	2977.03	184157	7.81724e+06	-3171.84	2977.03	2977.03	0	0	0	0	0
	1375	184109	7.81737e+06	-3172.66	2978.24	184115	7.81737e+06	-3177.17	2984.87	2981.55	6.63702	6.00953	47.8405	0.834975	8.95346
	1500	184170	7.81749e+06	-3172.54	2978.06	184187	7.81749e+06	-3183.57	2994.31	2986.18	16.2479	16.4399	44.6635	0.779526	23.1142
	1625	184182	7.81761e+06	-3179.33	2988.05	184199	7.81761e+06	-3188.58	3001.71	2994.88	13.651	16.348	39.8626	0.695733	21.2981
	1750	184212	7.81774e+06	-3183.83	2994.69	184236	7.81773e+06	-3198.74	3016.75	3005.72	22.0541	24.1933	42.3516	0.739175	32.7368
	1875	184150	7.81787e+06	-3178.03	2986.14	184180	7.81787e+06	-3196.78	3013.84	2999.99	27.7006	30.8306	41.939	0.731974	41.4469
	2000	184109	7.818e+06	-3170.65	2975.28	184122	7.818e+06	-3179.33	2988.05	2981.67	12.774	13.484	43.451	0.758363	18.574
	2125	184000	7.81814e+06	-3156.59	2954.66	184021	7.81814e+06	-3167.78	2971.06	2962.86	16.402	21.4509	37.4026	0.652798	27.0031
	2250	184022	7.81827e+06	-3150.49	2945.75	184052	7.81826e+06	-3171.83	2977.02	2961.38	31.2695	30.3356	45.8684	0.800555	43.5664
	2375	183999	7.81839e+06	-3153	2949.41	184018	7.81839e+06	-3166.6	2969.33	2959.37	19.9196	19.3336	45.8552	0.800324	27.7593
	2500	184136	7.8185e+06	-3153.23	2949.75	184149	7.8185e+06	-3161.97	2962.54	2956.15	12.7924	12.4049	45.881	0.800775	17.8193
	2625	184162	7.81863e+06	-3160.85	2960.9	184170	7.81862e+06	-3165.59	2967.85	2964.38	6.95001	8.61183	38.9046	0.679013	11.0664
	2750	184242	7.81874e+06	-3158.07	2956.83	184263	7.81874e+06	-3172.36	2977.79	2967.31	20.9658	21.219	44.6561	0.779396	29.8296
	2875	184270	7.81886e+06	-3157.3	2955.7	184298	7.81886e+06	-3175.43	2982.31	2969.01	26.6093	28.1179	43.4209	0.757838	38.7127
	3000	184323	7.81898e+06	-3179.53	2988.35	184323	7.81898e+06	-3179.53	2988.35	2988.35	0	0	0	0	0
	3125	184273	7.81911e+06	-3187.71	3000.42	184273	7.81911e+06	-3187.71	3000.42	3000.42	0	0	0	0	0
	3250	184279	7.81924e+06	-3193.67	3009.23	184279	7.81924e+06	-3193.67	3009.23	3009.23	0	0	0	0	0
	3375	184332	7.81936e+06	-3193.13	3008.44	184332	7.81936e+06	-3193.13	3008.44	3008.44	0	0	0	0	0
	3500	184294	7.81949e+06	-3206.87	3028.81	184294	7.81949e+06	-3206.87	3028.81	3028.81	0	0	0	0	0
	3625	184330	7.81961e+06	-3196.04	3012.74	184330	7.81961e+06	-3196.04	3012.74	3012.74	0	0	0	0	0
	3750	184344	7.81974e+06	-3204.6	3025.44	184344	7.81974e+06	-3204.6	3025.44	3025.44	0	0	0	0	0
	3875	184350	7.81986e+06	-3209.76	3033.11	184350	7.81986e+06	-3209.76	3033.11	3033.11	0	0	0	0	0
	4000	184271	7.82e+06	-3209.39	3032.56	184284	7.82e+06	-3215.5	3041.66	3037.11	9.09704	13.0003	34.9826	0.610562	15.8671
	4125	184247	7.82013e+06	-3213.93	3039.32	184259	7.82013e+06	-3220.53	3049.16	3044.24	9.84111	12.3553	38.5375	0.672607	15.7956
	4250	184216	7.82026e+06	-3203.16	3023.3	184233	7.82025e+06	-3216.96	3043.83	3033.57	20.5314	16.4485	51.3004	0.895361	26.3076
	4375	184341	7.82037e+06	-3196.86	3013.96	184360	7.82036e+06	-3210.32	3033.94	3023.95	19.9855	18.5671	47.1071	0.822173	27.2792
	4500	184393	7.82049e+06	-3196.65	3013.65	184415	7.82048e+06	-3211.01	3034.97	3024.31	21.3234	22.4097	43.5771	0.760563	30.9335
	4625	184479	7.8206e+06	-3199.12	3017.31	184488	7.8206e+06	-3203.58	3023.93	3020.62	6.61764	8.78429	36.9925	0.645642	10.998
	4750	184454	7.82073e+06	-3187.93	3000.75	184454	7.82073e+06	-3187.93	3000.75	3000.75	0	0	0	0	0
	4875	184432	7.82086e+06	-3198.57	3016.49	184432	7.82086e+06	-3200.03	3018.66	3017.58	2.16494	0.343657	80.9803	1.41337	2.19204
	5000	184470	7.82098e+06	-3193.16	3008.48	184484	7.82098e+06	-3198.08	3015.77	3012.12	7.28722	14.1191	27.2994	0.476464	15.8888
	5125	184504	7.8211e+06	-3192.44	3007.41	184511	7.8211e+06	-3197.7	3015.2	3011.31	7.78948	7.05028	47.8516	0.835169	10.5063
	5250	184508	7.82123e+06	-3189.46	3003.01	184525	7.82123e+06	-3201.66	3021.08	3012.04	18.0696	16.5899	47.4446	0.828065	24.5303
	5375	184513	7.82135e+06	-3187.42	2999.99	184544	7.82135e+06	-3209.98	3033.44	3016.72	33.4465	31.4954	46.7209	0.815433	45.9416
	5500	184558	7.82147e+06	-3190.02	3003.83	184581	7.82147e+06	-3206.33	3028.01	3015.92	24.1766	23.0237	46.3992	0.809819	33.3856
	5625	184585	7.8216e+06	-3187	2999.37	184600	7.82159e+06	-3198.96	3017.07	3008.22	17.6999	15.5617	48.6783	0.849597	23.5681
	5750	184586	7.82172e+06	-3184.68	2995.95	184597	7.82172e+06	-3192.96	3008.18	3002.06	12.238	10.7714	48.6471	0.849051	16.3031
	5875	184618	7.82184e+06	-3182.89	2993.3	184633	7.82184e+06	-3192.34	3007.27	3000.29	13.962	15.2392	42.4957	0.741689	20.6681
	6000	184614	7.82197e+06	-3180.75	2990.15	184626	7.82197e+06	-3188.63	3001.78	2995.96	11.6318	11.6681	44.9107	0.78384	16.4756
	6125	184658	7.82209e+06	-3180.6	2989.93	184667	7.82209e+06	-3186.32	2998.37	2994.15	8.44016	9.23827	42.4151	0.740283	12.5133
	6250	184673	7.82221e+06	-3182.08	2992.11	184685	7.82221e+06	-3190.37	3004.35	2998.23	12.2429	12.4955	44.415	0.775188	17.4935
	6375	184645	7.82234e+06	-3174.52	2980.97	184656	7.82234e+06	-3182.52	2992.76	2986.87	11.7862	11.528	45.6346	0.796474	16.4867
	6500	184690	7.82246e+06	-3165.41	2967.59	184716	7.82246e+06	-3183.36	2994	2980.79	26.4113	25.7786	45.6945	0.79752	36.9065
	6625	184725	7.82259e+06	-3166.3	2968.89	184739	7.82258e+06	-3175.49	2982.4	2975.65	13.5072	13.4543	45.1125	0.787361	19.0647
	6750	184766	7.82271e+06	-3165.26	2967.37	184774	7.82271e+06	-3170.91	2975.66	2971.51	8.29693	7.94703	46.234	0.806935	11.4889
	6875	184749	7.82283e+06	-3160.83	2960.87	184761	7.82283e+06	-3168.47	2972.08	2966.47	11.2071	11.8294	43.4528	0.758395	16.2952
	7000	184751	7.82296e+06	-3160.57	2960.49	184760	7.82296e+06	-3163.26	2964.43	2962.46	3.94259	9.00503	23.6448	0.41268	9.83028
	7125	184761	7.82309e+06	-3155.04	2952.4	184775	7.82308e+06	-3161.83	2962.34	2957.37	9.94087	13.8871	35.5963	0.621273	17.0785
	7250	184833	7.8232e+06	-3158	2956.73	184844	7.8232e+06	-3163.84	2965.28	2961	8.5567	11.4263	36.8282	0.642773	14.275
	7375	184843	7.82333e+06	-3157.4	2955.85	184865	7.82332e+06	-3171.07	2975.9	2965.87	20.05	21.9855	42.3637	0.739385	29.7551
	7500	184862	7.82345e+06	-3150.83	2946.24	184888	7.82345e+06	-3165.74	2968.07	2957.16	21.8279	25.889	40.1354	0.700495	33.8629
	7625	184905	7.82357e+06	-3157.02	2955.29	184918	7.82357e+06	-3165.21	2967.29	2961.29	12.0006	12.5054	43.8201	0.764804	17.332
	7750	184888	7.8237e+06	-3155.41	2952.94	184899	7.8237e+06	-3159.83	2959.41	2956.17	6.46943	11.497	29.3668	0.512547	13.1922
	7875	184949	7.82382e+06	-3155.85	2953.58	184966	7.82381e+06	-3166.33	2968.94	2961.26	15.356	16.4584	43.0154	0.750761	22.5097
	8000	184957	7.82394e+06	-3156.88	2955.09	184971	7.82394e+06	-3166.19	2968.73	2961.91	13.6435	14.3002	43.6539	0.761904	19.7646
	8125	184896	7.82408e+06	-3153.23	2949.75	184904	7.82408e+06	-3157.79	2956.42	2953.08	6.66992	7.51288	41.5986	0.726032	10.0465
	8250	184931	7.8242e+06	-3156.66	2954.77	184931	7.8242e+06	-3156.66	2954.77	2954.77	0	0	0	0	0
	8375	184866	7.82433e+06	-3153.11	2949.57	184866	7.82433e+06	-3153.11	2949.57	2949.57	0	0	0	0	0
	8500	184836	7.82446e+06	-3146.64	2940.13	184842	7.82446e+06	-3148.4	2942.69	2941.41	2.56789	6.00091	23.1669	0.404339	6.52725
	8625	184909	7.82458e+06	-3144.81	2937.46	184914	7.82458e+06	-3146.93	2940.55	2939	3.09153	5.46631	29.4908	0.514712	6.27997
	8750	184959	7.8247e+06	-3139.14	2929.2	184968	7.8247e+06	-3143.32	2935.29	2932.24	6.08665	9.60042	32.3746	0.565044	11.3673
	8875	184979	7.82482e+06	-3138.69	2928.55	184983	7.82482e+06	-3141.55	2932.71	2930.63	4.16309	4.53722	42.5377	0.742422	6.15774
	9000	185030	7.82494e+06	-3135.84	2924.4	185043	7.82494e+06	-3143.98	2936.25	2930.32	11.848	13.5647	41.1355	0.717949	18.0104
	9125	185087	7.82506e+06	-3135.67	2924.15	185109	7.82506e+06	-3150.78	2946.17	2935.16	22.0161	22.6913	44.1348	0.770297	31.6165
	9250	185058	7.82519e+06	-3131.95	2918.75	185071	7.82519e+06	-3140.56	2931.27	2925.01	12.5176	13.0499	43.8074	0.764584	18.0829
	9375	185071	7.82531e+06	-3129.95	2915.85	185084	7.82531e+06	-3138.78	2928.68	2922.26	12.8298	13.1206	44.358	0.774193	18.3509
	9500	185100	7.82544e+06	-3123.86	2907.02	185135	7.82543e+06	-3147.52	2941.41	2924.21	34.3919	35.0565	44.4517	0.775829	49.1097
	9625	185179	7.82555e+06	-3118.26	2898.92	185220	7.82555e+06	-3143.99	2936.26	2917.59	37.3468	40.8044	42.4668	0.741186	55.3153
	9750	185192	7.82568e+06	-3128.19	2913.29	185210	7.82567e+06	-3140.39	2931.02	2922.16	17.7259	18.9193	43.1348	0.752844	25.9258
	9875	185249	7.82579e+06	-3125.52	2909.42	185288	7.82579e+06	-3150.75	2946.13	2927.77	36.7024	39.11	43.1811	0.753652	53.6345
	10000	185278	7.82592e+06	-3122.41	2904.92	185312	7.82591e+06	-3145.85	2938.97	2921.95	34.0553	34.2094	44.8707	0.783142	48.2705
	10125	185341	7.82603e+06	-3122.9	2905.63	185371	7.82603e+06	-3140.68	2931.44	2918.54	25.8129	29.6708	41.0225	0.715978	39.3277
	10250	185374	7.82616e+06	-3121.43	2903.5	185405	7.82615e+06	-3139.68	2929.99	2916.74	26.4849	31.163	40.3607	0.704427	40.8972
	10375	185408	7.82628e+06	-3120.96	2902.82	185438	7.82627e+06	-3138.29	2927.96	2915.39	25.1424	29.3583	40.5767	0.708197	38.6529
	10500	185429	7.8264e+06	-3121.72	2903.92	185459	7.8264e+06	-3136.22	2924.95	2914.44	21.0322	30.0951	34.9482	0.60996	36.7161
	10625	185460	7.82652e+06	-3120.19	2901.71	185484	7.82652e+06	-3135.64	2924.11	2912.91	22.4027	24.8098	42.0813	0.734458	33.4277
	10750	185472	7.82665e+06	-3119.09	2900.12	185500	7.82664e+06	-3138.11	2927.7	2913.91	27.5853	28.1377	44.432	0.775484	39.4041
	10875	185506	7.82677e+06	-3123.22	2906.09	185531	7.82677e+06	-3139.03	2929.04	2917.57	22.9481	24.6176	42.9898	0.750314	33.6547
	11000	185517	7.82689e+06	-3119.31	2900.43	185546	7.82689e+06	-3136.44	2925.27	2912.85	24.8384	29.4686	40.1268	0.700344	38.5402
	11125	185524	7.82702e+06	-3122.96	2905.72	185533	7.82702e+06	-3129.17	2914.71	2910.22	8.99931	9.19861	44.3725	0.774447	12.8686
	11250	185550	7.82714e+06	-3127.28	2911.97	185569	7.82714e+06	-3139.65	2929.94	2920.96	17.9682	19.3931	42.8159	0.747279	26.4377
	11375	185602	7.82726e+06	-3123.05	2905.85	185624	7.82726e+06	-3135.35	2923.69	2914.77	17.8424	22.2175	38.7673	0.676618	28.4951
	11500	185651	7.82738e+06	-3121.85	2904.11	185672	7.82738e+06	-3132.08	2918.94	2911.52	14.8292	20.765	35.5323	0.620156	25.5164
	11625	185656	7.82751e+06	-3116.99	2897.08	185670	7.8275e+06	-3123.16	2906.01	2901.54	8.92435	14.4218	31.7497	0.554137	16.9597
	11750	185653	7.82763e+06	-3115.7	2895.22	185672	7.82763e+06	-3124.23	2907.55	2901.39	12.3374	18.8301	33.2328	0.580022	22.5119
	11875	185679	7.82776e+06	-3124.63	2908.13	185688	7.82775e+06	-3129.06	2914.56	2911.34	6.42139	9.18869	34.9472	0.609944	11.2101
	12000	185770	7.82787e+06	-3128.1	2913.16	185796	7.82787e+06	-3140.02	2930.48	2921.82	17.3178	25.9795	33.6873	0.587954	31.2225
	12125	185725	7.828e+06	-3132.82	2920.01	185735	7.828e+06	-3138.09	2927.67	2923.84	7.65985	9.84358	37.8885	0.661279	12.4727
	12250	185697	7.82813e+06	-3135.26	2923.56	185702	7.82813e+06	-3140.36	2930.98	2927.27	7.41828	5.49605	53.466	0.933158	9.23241
	12375	185760	7.82825e+06	-3132.59	2919.68	185783	7.82825e+06	-3141.46	2932.58	2926.13	12.8988	22.8836	29.4087	0.513278	26.2685
	12500	185846	7.82836e+06	-3131.22	2917.69	185860	7.82836e+06	-3138.36	2928.07	2922.88	10.3757	14.3213	35.923	0.626975	17.6849
	12625	185901	7.82848e+06	-3133.92	2921.61	185909	7.82848e+06	-3137.71	2927.12	2924.37	5.50932	7.76466	35.3571	0.617098	9.52064
	12750	185957	7.8286e+06	-3130.54	2916.7	185964	7.8286e+06	-3134.2	2922.02	2919.36	5.31455	7.42234	35.6034	0.621397	9.12884
	12875	185977	7.82873e+06	-3130.78	2917.05	185985	7.82872e+06	-3132.94	2920.19	2918.62	3.13595	7.55384	22.5456	0.393495	8.17892
	13000	185979	7.82885e+06	-3126.86	2911.37	185986	7.82885e+06	-3131.04	2917.43	2914.4	6.06305	7.71508	38.1627	0.666065	9.81239
	13125	186085	7.82896e+06	-3126.42	2910.73	186094	7.82896e+06	-3130.12	2916.09	2913.41	5.36566	8.88474	31.1286	0.543296	10.3793
	13250	186113	7.82909e+06	-3129.04	2914.53	186122	7.82908e+06	-3132.16	2919.05	2916.79	4.5279	8.65279	27.6225	0.482104	9.76589
	13375	186143	7.82921e+06	-3128.47	2913.7	186158	7.82921e+06	-3133.68	2921.26	2917.48	7.56215	14.996	26.7608	0.467063	16.7948
	13500	186154	7.82933e+06	-3129.52	2915.22	186168	7.82933e+06	-3134.04	2921.78	2918.5	6.5621	13.7867	25.4532	0.444242	15.2687
	13625	186166	7829457	-3131.11	2917.53	186173	7.82946e+06	-3133.57	2921.1	2919.32	3.57204	6.90758	27.3444	0.477249	7.77651
	13750	186182	7.82958e+06	-3130.72	2916.96	186190	7.82958e+06	-3133.58	2921.12	2919.04	4.15261	7.77587	28.1039	0.490506	8.81524
	13875	186239	7.8297e+06	-3129.66	2915.43	186246	7.8297e+06	-3133.59	2921.13	2918.28	5.70526	6.80842	39.962	0.697469	8.88283
	14000	186257	7.82982e+06	-3127.33	2912.05	186264	7.82982e+06	-3130.79	2917.07	2914.56	5.01887	6.70667	36.809	0.642438	8.37666
	14125	186283	7.82995e+06	-3124.11	2907.38	186296	7.82994e+06	-3130.39	2916.48	2911.93	9.10417	12.2126	36.7035	0.640596	15.2327
	14250	186320	7.83007e+06	-3114.92	2894.09	186333	7.83007e+06	-3122.32	2904.79	2899.44	10.6985	13.6255	38.1384	0.665641	17.3237
	14375	186388	7.83018e+06	-3110.77	2888.1	186400	7.83018e+06	-3118.57	2899.36	2893.73	11.2626	12.1135	42.9154	0.749015	16.5403
	14500	186414	7.83031e+06	-3115.44	2894.84	186425	7.83031e+06	-3120.09	2901.56	2898.2	6.72087	11.0939	31.2083	0.544687	12.9709
	14625	186417	7.83043e+06	-3114.49	2893.47	186426	7.83043e+06	-3119.81	2901.16	2897.31	7.68775	9.58058	38.7446	0.676221	12.2837
	14750	186416	7.83056e+06	-3110.28	2887.4	186435	7.83056e+06	-3120.93	2902.78	2895.09	15.3824	19.5246	38.2327	0.667286	24.8561
	14875	186431	7.83068e+06	-3112.18	2890.14	186450	7.83068e+06	-3117.09	2897.23	2893.68	7.08959	18.7581	20.704	0.361354	20.0531
	15000	186545	7.83079e+06	-3109.36	2886.07	186555	7.83079e+06	-3116.4	2896.23	2891.15	10.1594	10.5493	43.9214	0.766573	14.6459
	15125	186528	7.83092e+06	-3106.87	2882.48	186539	7.83092e+06	-3113.17	2891.56	2887.02	9.08326	10.5705	40.6726	0.709872	13.937
	15250	186515	7.83105e+06	-3103.38	2877.46	186532	7.83105e+06	-3114.04	2892.82	2885.14	15.363	17.5276	41.2347	0.719681	23.3075
	15375	186573	7.83117e+06	-3102.3	2875.9	186587	7.83117e+06	-3109.51	2886.29	2881.09	10.3816	14.0781	36.4062	0.635408	17.4921
	15500	186599	7.83129e+06	-3103.46	2877.57	186608	7.83129e+06	-3109.67	2886.52	2882.04	8.94363	8.83516	45.3496	0.791499	12.5717
	15625	186623	7.83141e+06	-3101.01	2874.05	186639	7.83141e+06	-3106.7	2882.24	2878.14	8.18764	16.167	26.8596	0.468788	18.122
	15750	186699	7.83153e+06	-3101.26	2874.41	186707	7.83153e+06	-3106.31	2881.67	2878.04	7.26655	7.91728	42.546	0.742567	10.7464
	15875	186687	7.83166e+06	-3099.28	2871.56	186697	7.83166e+06	-3105.7	2880.8	2876.18	9.23405	10.0656	42.5328	0.742338	13.6596
	16000	186725	7.83178e+06	-3095.27	2865.8	186737	7.83178e+06	-3102.43	2876.09	2870.95	10.2864	12.0117	40.5756	0.708178	15.8143
	16125	186716	7.83191e+06	-3092.08	2861.23	186722	7.83191e+06	-3095.9	2866.71	2863.97	5.47947	6.65579	39.4634	0.688766	8.62115
	16250	186701	7.83203e+06	-3089.96	2858.19	186711	7.83203e+06	-3095.33	2865.89	2862.04	7.6995	10.5394	36.1497	0.630932	13.0523
	16375	186741	7.83216e+06	-3085.32	2851.55	186750	7.83215e+06	-3089.22	2857.13	2854.34	5.58218	9.13782	31.4202	0.548387	10.708
	16500	186769	7.83228e+06	-3079.61	2843.39	186777	7.83228e+06	-3082.36	2847.32	2845.35	3.92821	7.74483	26.8943	0.469394	8.68408
	16625	186810	7.8324e+06	-3084.21	2849.96	186810	7.8324e+06	-3084.21	2849.96	2849.96	0	0	0	0	0
	16750	186876	7.83252e+06	-3082.88	2848.06	186891	7.83251e+06	-3092.11	2861.27	2854.67	13.2121	14.6537	42.0385	0.733711	19.7305
	16875	186883	7.83264e+06	-3080.39	2844.5	186893	7.83264e+06	-3088.68	2856.36	2850.43	11.8553	10.3174	48.9677	0.854647	15.7161
	17000	186963	7.83276e+06	-3081.78	2846.49	186974	7.83276e+06	-3088.9	2856.67	2851.58	10.1847	10.9723	42.8682	0.748192	14.9706
	17125	187125	7.83286e+06	-3075.75	2837.88	187125	7.83286e+06	-3075.75	2837.88	2837.88	0	0	0	0	0
	17250	187014	7.833e+06	-3071.35	2831.61	187027	7.833e+06	-3078.45	2841.73	2836.67	10.122	13.0697	37.7565	0.658976	16.531
	17375	187048	7.83312e+06	-3067.26	2825.79	187064	7.83312e+06	-3077.06	2839.75	2832.77	13.9589	15.8954	41.2888	0.720626	21.1545
	17500	187036	7.83325e+06	-3065.86	2823.8	187048	7.83325e+06	-3073.29	2834.37	2829.09	10.5743	12.6666	39.8557	0.695614	16.5003
	17625	187060	7.83337e+06	-3064.87	2822.39	187070	7.83337e+06	-3070.66	2830.63	2826.51	8.23547	9.61163	40.5907	0.708442	12.6573
	17750	187084	7.8335e+06	-3059.92	2815.36	187093	7.8335e+06	-3063.74	2820.79	2818.08	5.42299	8.70367	31.9258	0.55721	10.2549
	17875	187185	7.83361e+06	-3060.76	2816.56	187194	7.83361e+06	-3064.09	2821.28	2818.92	4.72828	8.75454	28.3733	0.495207	9.94981
	18000	187139	7.83374e+06	-3056.51	2810.53	187152	7.83374e+06	-3063.57	2820.55	2815.54	10.0168	13.0003	37.6144	0.656495	16.4117
	18125	187088	7.83387e+06	-3058.49	2813.34	187097	7.83387e+06	-3063.53	2820.49	2816.91	7.15304	9.37968	37.3295	0.651523	11.7959
	18250	187130	7.834e+06	-3057.47	2811.89	187143	7.83399e+06	-3064.67	2822.11	2817	10.2188	13.071	38.018	0.66354	16.5914
	18375	187130	7.83412e+06	-3052.29	2804.55	187142	7.83412e+06	-3060.41	2816.06	2810.31	11.507	12.5166	42.5934	0.743396	17.0022
	18500	187182	7.83424e+06	-3046.34	2796.14	187188	7.83424e+06	-3052.09	2804.27	2800.2	8.12953	6.11128	53.0664	0.926184	10.1704
	18625	187182	7.83437e+06	-3048.2	2798.77	187182	7.83437e+06	-3048.2	2798.77	2798.77	0	0	0	0	0
	18750	187299	7.83448e+06	-3041.5	2789.31	187311	7.83448e+06	-3048.21	2798.78	2794.05	9.47336	11.3866	39.7596	0.693936	14.8121
	18875	187374	7.83459e+06	-3043.13	2791.61	187374	7.83459e+06	-3043.13	2791.61	2791.61	0	0	0	0	0
HD	0	183731	7.81603e+06	-3204.49	3025.28	183746	7.81603e+06	-3212.09	3036.58	3030.93	11.301	14.7343	37.4875	0.654281	18.5691
	125	183740	7.81616e+06	-3203.67	3024.06	183750	7.81616e+06	-3210.26	3033.85	3028.96	9.7951	10.8421	42.0957	0.734709	14.6115
	250	183820	7.81627e+06	-3211.94	3036.36	183839	7.81627e+06	-3223.08	3052.97	3044.66	16.612	19.1413	40.9535	0.714773	25.3446
	375	183885	7.81639e+06	-3215.59	3041.79	183904	7.81639e+06	-3226.01	3057.35	3049.57	15.5541	18.7481	39.6803	0.692552	24.3603
	500	183954	7.81651e+06	-3220.58	3049.23	183969	7.81651e+06	-3230.58	3064.18	3056.71	14.9492	15.5319	43.9047	0.766282	21.5573
	625	183964	7.81663e+06	-3225.43	3056.48	183979	7.81663e+06	-3235.11	3070.97	3063.72	14.4917	15.0878	43.8453	0.765246	20.9201
	750	184030	7.81675e+06	-3229.97	3063.27	184045	7.81675e+06	-3239.49	3077.54	3070.41	14.2717	15.5405	42.5628	0.742861	21.0995
	875	184063	7.81687e+06	-3228.8	3061.52	184085	7.81687e+06	-3243.26	3083.21	3072.36	21.686	21.8553	44.7772	0.781509	30.7886
	1000	184104	7.81699e+06	-3223.23	3053.19	184124	7.81699e+06	-3239.67	3077.81	3065.5	24.6208	21.0068	49.5287	0.864439	32.3647
	1125	184166	7.81711e+06	-3224.48	3055.06	184180	7.81711e+06	-3235.86	3072.1	3063.58	17.0362	14.4317	49.7314	0.867977	22.3272
	1250	184234	7.81723e+06	-3226.64	3058.29	184262	7.81723e+06	-3242.67	3082.32	3070.3	24.0304	28.2283	40.4074	0.705241	37.0715
	1375	184205	7.81736e+06	-3226.26	3057.72	184233	7.81736e+06	-3247.91	3090.2	3073.96	32.4795	28.5111	48.7227	0.850372	43.218
	1500	184251	7.81748e+06	-3237.59	3074.69	184263	7.81748e+06	-3248.06	3090.43	3082.56	15.7348	13.0089	50.4173	0.879948	20.4161
	1625	184284	7.8176e+06	-3240.89	3079.64	184302	7.8176e+06	-3251.4	3095.46	3087.55	15.8109	17.5884	41.9537	0.73223	23.6503
	1750	184323	7.81772e+06	-3247.67	3089.84	184341	7.81772e+06	-3256.3	3102.84	3096.34	13.0059	17.9208	35.97	0.627795	22.1429
	1875	184260	7.81786e+06	-3246	3087.33	184273	7.81785e+06	-3250.41	3093.96	3090.64	6.63845	12.3144	28.3283	0.494422	13.9898
	2000	184227	7.81799e+06	-3245.04	3085.88	184228	7.81799e+06	-3247.66	3089.82	3087.85	3.9417	0.978673	76.0562	1.32743	4.06138
	2125	184098	7.81813e+06	-3222.69	3052.38	184116	7.81813e+06	-3231.13	3065.01	3058.7	12.6223	18.2446	34.6769	0.605225	22.1853
	2250	184113	7.81825e+06	-3214.57	3040.27	184138	7.81825e+06	-3232.51	3067.07	3053.67	26.802	25.5057	46.4196	0.810175	36.9985
	2375	184082	7.81838e+06	-3208.57	3031.34	184112	7.81838e+06	-3230.91	3064.68	3048.01	33.3365	30.0231	47.9935	0.837645	44.8632
	2500	184221	7.81849e+06	-3213.4	3038.53	184247	7.81849e+06	-3231.66	3065.8	3052.16	27.2716	25.9088	46.4679	0.811018	37.6165
	2625	184287	7.81861e+06	-3230.43	3063.96	184301	7.81861e+06	-3238.91	3076.67	3070.32	12.7123	14.3213	41.5939	0.725951	19.1495
	2750	184358	7.81873e+06	-3236.74	3073.42	184363	7.81872e+06	-3238.88	3076.63	3075.02	3.21115	5.24427	31.4798	0.549426	6.1493
	2875	184395	7.81885e+06	-3239.1	3076.96	184401	7.81885e+06	-3242.99	3082.8	3079.88	5.84288	5.67713	45.8243	0.799786	8.14672
	3000	184403	7.81897e+06	-3244.86	3085.61	184413	7.81897e+06	-3252.51	3097.13	3091.37	11.5174	9.56075	50.3034	0.87796	14.9686
	3125	184330	7.81911e+06	-3230.96	3064.75	184384	7.8191e+06	-3259.83	3108.17	3086.46	43.4212	54.7734	38.4054	0.6703	69.8966
	3250	184334	7.81923e+06	-3229.68	3062.84	184390	7.81923e+06	-3263.77	3114.13	3088.48	51.2931	55.7805	42.6002	0.743513	75.779
	3375	184388	7.81935e+06	-3229.46	3062.51	184432	7.81935e+06	-3257.69	3104.94	3083.72	42.435	44.5069	43.6349	0.761572	61.4947
	3500	184346	7.81948e+06	-3244.24	3084.68	184346	7.81948e+06	-3244.24	3084.68	3084.68	0	0	0	0	0
	3625	184389	7.8196e+06	-3241.53	3080.61	184389	7.8196e+06	-3241.53	3080.61	3080.61	0	0	0	0	0
	3750	184389	7.81973e+06	-3239.05	3076.88	184389	7.81973e+06	-3239.05	3076.88	3076.88	0	0	0	0	0
	3875	184390	7.81986e+06	-3239.01	3076.82	184390	7.81986e+06	-3239.01	3076.82	3076.82	0	0	0	0	0
	4000	184331	7.81999e+06	-3256.65	3103.37	184331	7.81999e+06	-3256.65	3103.37	3103.37	0	0	0	0	0
	4125	184309	7.82012e+06	-3264.75	3115.61	184309	7.82012e+06	-3264.75	3115.61	3115.61	0	0	0	0	0
	4250	184290	7.82025e+06	-3261.06	3110.03	184290	7.82025e+06	-3261.06	3110.03	3110.03	0	0	0	0	0
	4375	184402	7.82036e+06	-3239.77	3077.96	184402	7.82036e+06	-3239.77	3077.96	3077.96	0	0	0	0	0
	4500	184443	7.82048e+06	-3235.53	3071.6	184443	7.82048e+06	-3235.53	3071.6	3071.6	0	0	0	0	0
	4625	184526	7.82059e+06	-3241.49	3080.55	184535	7.82059e+06	-3245.45	3086.5	3083.52	5.95244	8.63296	34.5863	0.603645	10.4862
	4750	184513	7.82072e+06	-3240.34	3078.82	184519	7.82072e+06	-3244.8	3085.52	3082.17	6.70217	5.23436	52.0103	0.907752	8.50397
	4875	184488	7.82085e+06	-3243.48	3083.54	184497	7.82085e+06	-3250.85	3094.63	3089.08	11.0907	9.47022	49.5063	0.864048	14.5838
	5000	184546	7.82097e+06	-3256.88	3103.72	184549	7.82097e+06	-3259.07	3107.03	3105.37	3.30648	2.89375	48.8084	0.851867	4.39393
	5125	184591	7.82109e+06	-3257.33	3104.4	184595	7.82109e+06	-3260.53	3109.23	3106.81	4.8328	3.56976	53.5485	0.934597	6.00826
	5250	184607	7.82121e+06	-3262.43	3112.1	184615	7.82121e+06	-3265.25	3116.37	3114.24	4.26527	7.88624	28.4067	0.495791	8.96579
	5375	184618	7.82134e+06	-3262.96	3112.9	184625	7.82134e+06	-3268.06	3120.62	3116.76	7.7177	7.67413	45.1622	0.788229	10.8837
	5500	184664	7.82146e+06	-3265.59	3116.88	184677	7.82146e+06	-3275.38	3131.72	3124.3	14.8374	12.8887	49.0204	0.855567	19.6536
	5625	184683	7.82158e+06	-3263.3	3113.42	184694	7.82158e+06	-3269.67	3123.06	3118.24	9.64241	11.0939	40.9961	0.715517	14.6986
	5750	184685	7.82171e+06	-3262.54	3112.27	184702	7.82171e+06	-3276.84	3133.94	3123.1	21.6673	17.4979	51.0767	0.891457	27.8505
	5875	184714	7.82183e+06	-3257.24	3104.26	184744	7.82183e+06	-3280.46	3139.44	3121.85	35.1739	30.2861	49.2703	0.859929	46.416
	6000	184709	7.82196e+06	-3251.2	3095.15	184738	7.82195e+06	-3272.59	3127.49	3111.32	32.3334	29.0755	48.0369	0.838402	43.4837
	6125	184746	7.82208e+06	-3249.39	3092.43	184761	7.82208e+06	-3261.56	3110.79	3101.61	18.3604	14.8956	50.948	0.889211	23.6428
	6250	184766	7.8222e+06	-3244.12	3084.5	184785	7.8222e+06	-3257.01	3103.92	3094.21	19.4175	19.4341	44.9756	0.784973	27.4722
	6375	184739	7.82233e+06	-3236.41	3072.92	184776	7.82233e+06	-3261.09	3110.08	3091.5	37.1574	37.7282	44.5633	0.777776	52.9537
	6500	184770	7.82245e+06	-3230.47	3064.02	184802	7.82245e+06	-3256.34	3102.9	3083.46	38.8855	32.0399	50.513	0.881618	50.3849
	6625	184814	7.82257e+06	-3238.96	3076.75	184833	7.82257e+06	-3254.91	3100.75	3088.75	24.0005	19.0508	51.5586	0.899868	30.6424
	6750	184860	7.82269e+06	-3232.08	3066.43	184884	7.82269e+06	-3248.06	3090.43	3078.43	23.9952	24.8198	44.0323	0.768509	34.5223
	6875	184852	7.82282e+06	-3227.77	3059.98	184870	7.82282e+06	-3237.83	3075.05	3067.51	15.0723	18.8585	38.6328	0.67427	24.1416
	7000	184852	7.82295e+06	-3221.99	3051.34	184870	7.82294e+06	-3233.33	3068.3	3059.82	16.9632	17.9717	43.3465	0.756539	24.713
	7125	184862	7.82307e+06	-3216.59	3043.28	184862	7.82307e+06	-3216.59	3043.28	3043.28	0	0	0	0	0
	7250	184925	7.82319e+06	-3218.15	3045.61	184934	7.82319e+06	-3222.25	3051.73	3048.67	6.11902	8.60192	35.4263	0.618306	10.5563
	7375	184919	7.82332e+06	-3209.11	3032.14	184941	7.82331e+06	-3223.19	3053.13	3042.64	20.9874	22.1679	43.4331	0.75805	30.5268
	7500	184955	7.82344e+06	-3210.95	3034.88	184973	7.82344e+06	-3219.68	3047.89	3041.39	13.0094	17.8911	36.0226	0.628714	22.1209
	7625	184989	7.82356e+06	-3212.46	3037.13	185008	7.82356e+06	-3224.74	3055.45	3046.29	18.3182	18.7594	44.3183	0.7735	26.2196
	7750	185002	7.82368e+06	-3215.74	3042.02	185012	7.82368e+06	-3220.17	3048.62	3045.32	6.60695	10.2863	32.7128	0.570945	12.2254
	7875	185039	7.82381e+06	-3213.56	3038.77	185057	7.8238e+06	-3221.06	3049.95	3044.36	11.1834	17.5276	32.5396	0.567923	20.7915
	8000	185040	7.82393e+06	-3213.93	3039.32	185080	7.82393e+06	-3237.62	3074.74	3057.03	35.4167	40.4422	41.2098	0.719247	53.7579
	8125	184987	7.82406e+06	-3208.59	3031.37	185016	7.82406e+06	-3226.3	3057.78	3044.58	26.4087	29.2268	42.1003	0.73479	39.3907
	8250	185013	7.82419e+06	-3206.48	3028.23	185046	7.82418e+06	-3226.59	3058.21	3043.22	29.9791	33.1005	42.1672	0.735956	44.6586
	8375	184960	7.82432e+06	-3203.08	3023.18	185002	7.82431e+06	-3225.74	3056.94	3040.06	33.7584	42.4181	38.5145	0.672205	54.2119
	8500	184958	7.82445e+06	-3221.9	3051.2	184958	7.82445e+06	-3221.9	3051.2	3051.2	0	0	0	0	0
	8625	185038	7.82456e+06	-3223.53	3053.64	185038	7.82456e+06	-3223.53	3053.64	3053.64	0	0	0	0	0
	8750	185106	7.82468e+06	-3216.16	3042.64	185133	7.82468e+06	-3230.11	3063.48	3053.06	20.8384	26.8974	37.7663	0.659146	34.0251
	8875	185102	7.82481e+06	-3209.48	3032.69	185126	7.8248e+06	-3222.97	3052.8	3042.75	20.1084	23.7816	40.216	0.701902	31.1434
	9000	185148	7.82493e+06	-3207.28	3029.42	185165	7.82492e+06	-3217.5	3044.64	3037.03	15.2161	17.034	41.7737	0.729089	22.8404
	9125	185190	7.82505e+06	-3205.09	3026.17	185204	7.82504e+06	-3214.63	3040.36	3033.27	14.1926	14.3312	44.7215	0.780537	20.1696
	9250	185166	7.82518e+06	-3203.32	3023.54	185178	7.82517e+06	-3211.86	3036.24	3029.89	12.696	12.9395	44.4556	0.775897	18.1278
	9375	185179	7.8253e+06	-3202.67	3022.58	185191	7.8253e+06	-3211.28	3035.37	3028.97	12.7976	12.7981	44.9988	0.785377	18.0989
	9500	185209	7.82542e+06	-3202.96	3023.01	185230	7.82542e+06	-3218.5	3046.13	3034.57	23.1249	21.6234	46.9219	0.818941	31.6596
	9625	185308	7.82554e+06	-3205.06	3026.12	185328	7.82553e+06	-3218.58	3046.25	3036.19	20.1257	20.2812	44.7795	0.78155	28.5723
	9750	185310	7.82566e+06	-3205.09	3026.17	185327	7.82566e+06	-3216.01	3042.42	3034.29	16.249	16.9322	43.8205	0.764811	23.4677
	9875	185366	7.82578e+06	-3201.48	3020.81	185383	7.82578e+06	-3212.82	3037.67	3029.24	16.8563	17.5884	43.7823	0.764146	24.3616
	10000	185384	7.8259e+06	-3195.75	3012.31	185410	7.8259e+06	-3213.66	3038.92	3025.62	26.6021	26.1308	45.512	0.794334	37.2893
	10125	185464	7.82602e+06	-3196.81	3013.88	185478	7.82602e+06	-3205.33	3026.53	3020.21	12.6407	14.2109	41.6532	0.726986	19.0194
	10250	185502	7.82614e+06	-3196.79	3013.86	185517	7.82614e+06	-3205.71	3027.09	3020.47	13.2349	15.2392	40.9736	0.715124	20.184
	10375	185531	7.82626e+06	-3194.21	3010.03	185553	7.82626e+06	-3207.19	3029.29	3019.66	19.2555	21.9756	41.2256	0.719523	29.2182
	10500	185556	7.82639e+06	-3192.9	3008.09	185585	7.82638e+06	-3208.68	3031.5	3019.8	23.4099	28.4602	39.439	0.68834	36.8512
	10625	185575	7.82651e+06	-3192.83	3007.99	185602	7.82651e+06	-3209.64	3032.93	3020.46	24.9414	26.9879	42.7432	0.746009	36.7481
	10750	185582	7.82663e+06	-3193.7	3009.28	185601	7.82663e+06	-3206.96	3028.95	3019.11	19.6687	19.6065	45.0906	0.78698	27.7718
	10875	185616	7.82676e+06	-3194.3	3010.17	185633	7.82675e+06	-3205.43	3026.67	3018.42	16.5068	17.3465	43.5791	0.760599	23.9453
	11000	185634	7.82688e+06	-3193.59	3009.12	185651	7.82688e+06	-3204.31	3025.01	3017.06	15.8943	16.993	43.0865	0.752001	23.2678
	11125	185639	7.827e+06	-3198.54	3016.45	185652	7.827e+06	-3205.19	3026.32	3021.38	9.86869	12.999	37.2053	0.649355	16.3207
	11250	185657	7.82713e+06	-3196.27	3013.08	185676	7.82713e+06	-3208.9	3031.83	3022.46	18.7473	19.7863	43.4554	0.75844	27.2573
	11375	185729	7.82724e+06	-3194.14	3009.93	185758	7.82724e+06	-3210.11	3033.63	3021.78	23.7016	28.8435	39.411	0.687852	37.3325
	11500	185798	7.82736e+06	-3194.87	3011.01	185813	7.82736e+06	-3202.48	3022.29	3016.65	11.2822	15.4612	36.1186	0.630388	19.1399
	11625	185794	7.82749e+06	-3190.43	3004.44	185805	7.82749e+06	-3196.1	3012.83	3008.64	8.39194	10.7813	37.8965	0.661418	13.6624
	11750	185791	7.82762e+06	-3192.18	3007.03	185801	7.82761e+06	-3197.45	3014.83	3010.93	7.80367	9.56075	39.222	0.684553	12.3412
	11875	185821	7.82774e+06	-3197	3014.17	185827	7.82774e+06	-3199.95	3018.54	3016.35	4.37324	6.00953	36.044	0.629087	7.43234
	12000	185924	7.82785e+06	-3201.4	3020.69	185938	7.82785e+06	-3205.87	3027.33	3024.01	6.63718	14.5619	24.5031	0.42766	16.0031
	12125	185870	7.82798e+06	-3207.64	3029.96	185879	7.82798e+06	-3210.84	3034.72	3032.34	4.75969	8.94553	28.0163	0.488977	10.133
	12250	185808	7.82812e+06	-3213.57	3038.78	185808	7.82812e+06	-3213.57	3038.78	3038.78	0	0	0	0	0
	12375	185899	7.82823e+06	-3210.91	3034.82	185910	7.82823e+06	-3217.37	3044.45	3039.63	9.62318	11.528	39.854	0.695583	15.0167
	12500	185996	7.82834e+06	-3206.84	3028.77	186013	7.82834e+06	-3215.23	3041.26	3035.01	12.4862	16.802	36.6175	0.639096	20.9336
	12625	186048	7.82846e+06	-3206.09	3027.65	186060	7.82846e+06	-3212.11	3036.61	3032.13	8.95379	12.3243	35.999	0.6283	15.2335
	12750	186089	7.82858e+06	-3202.1	3021.73	186098	7.82858e+06	-3206.61	3028.43	3025.08	6.69806	8.41223	38.5278	0.672438	10.7531
	12875	186103	7.82871e+06	-3199.31	3017.59	186112	7.82871e+06	-3204.14	3024.76	3021.17	7.16747	8.91578	38.7961	0.67712	11.4396
	13000	186101	7.82884e+06	-3193.41	3008.85	186114	7.82883e+06	-3199.74	3018.23	3013.54	9.37841	13.1715	35.4518	0.618751	16.1692
	13125	186207	7.82895e+06	-3197.08	3014.28	186215	7.82895e+06	-3200.45	3019.28	3016.78	4.99632	8.24968	31.2007	0.544555	9.64472
	13250	186254	7.82907e+06	-3198.04	3015.71	186259	7.82907e+06	-3199.85	3018.39	3017.05	2.68363	4.89075	28.7543	0.501857	5.57865
	13375	186299	7.82919e+06	-3197.84	3015.41	186307	7.82919e+06	-3200.56	3019.44	3017.43	4.03318	8.0574	26.5906	0.464093	9.01045
	13500	186301	7.82931e+06	-3197.02	3014.2	186306	7.82931e+06	-3199.11	3017.29	3015.74	3.09794	4.59801	33.9704	0.592894	5.54427
	13625	186301	7.82944e+06	-3195.79	3012.37	186306	7.82944e+06	-3198.75	3016.76	3014.57	4.38643	4.65018	43.3282	0.756219	6.39257
	13750	186327	7.82956e+06	-3196.12	3012.86	186336	7.82956e+06	-3199.91	3018.48	3015.67	5.6177	9.49005	30.6237	0.534485	11.0281
	13875	186371	7.82968e+06	-3199.06	3017.22	186371	7.82968e+06	-3199.06	3017.22	3017.22	0	0	0	0	0
	14000	186388	7.82981e+06	-3195.46	3011.88	186390	7.82981e+06	-3196.74	3013.78	3012.83	1.89614	1.9151	44.7151	0.780425	2.69499
	14125	186412	7.82993e+06	-3192.17	3007.01	186423	7.82993e+06	-3197.8	3015.35	3011.18	8.33719	10.7317	37.8427	0.66048	13.5896
	14250	186443	7.83005e+06	-3188.55	3001.66	186454	7.83005e+06	-3194.94	3011.11	3006.39	9.45312	10.6895	41.4876	0.724096	14.2698
	14375	186508	7.83017e+06	-3188.78	3002	186515	7.83017e+06	-3191.55	3006.1	3004.05	4.09582	6.83816	30.9201	0.539658	7.97096
	14500	186527	7.83029e+06	-3185.72	2997.48	186535	7.83029e+06	-3189.13	3002.52	3000	5.03785	8.99511	29.2517	0.510538	10.3098
	14625	186529	7.83042e+06	-3187.71	3000.42	186534	7.83042e+06	-3191.33	3005.77	3003.1	5.35158	5.57667	43.82	0.764804	7.72908
	14750	186554	7.83054e+06	-3186.33	2998.38	186565	7.83054e+06	-3192.05	3006.84	3002.61	8.45522	10.4687	38.9266	0.679398	13.4568
	14875	186607	7.83066e+06	-3184.38	2995.5	186621	7.83066e+06	-3190.3	3004.25	2999.88	8.74583	14.5024	31.0926	0.542668	16.9354
	15000	186652	7.83078e+06	-3181.7	2991.55	186661	7.83078e+06	-3186.12	2998.07	2994.81	6.52285	8.55234	37.3327	0.651578	10.7559
	15125	186647	7.83091e+06	-3178.34	2986.6	186659	7.83091e+06	-3183.58	2994.32	2990.46	7.72587	12.0415	32.6844	0.570451	14.3069
	15250	186637	7.83103e+06	-3178.56	2986.92	186646	7.83103e+06	-3183.82	2994.68	2990.8	7.75591	8.65279	41.8714	0.730794	11.62
	15375	186691	7.83115e+06	-3180.57	2989.88	186696	7.83115e+06	-3183.82	2994.68	2992.28	4.79365	4.9317	44.1867	0.771204	6.87756
	15500	186704	7.83128e+06	-3177.73	2985.7	186710	7.83128e+06	-3181.75	2991.62	2988.66	5.92484	5.71939	46.0108	0.803041	8.235
	15625	186741	7.8314e+06	-3176.05	2983.22	186748	7.8314e+06	-3180.35	2989.56	2986.39	6.33447	6.81834	42.8932	0.748627	9.30673
	15750	186814	7.83152e+06	-3175.53	2982.46	186821	7.83151e+06	-3179.64	2988.51	2985.49	6.05342	6.44368	43.2113	0.75418	8.84109
	15875	186803	7.83164e+06	-3171.55	2976.6	186811	7.83164e+06	-3176.41	2983.75	2980.18	7.15	8.02765	41.6905	0.727637	10.7501
	16000	186852	7.83176e+06	-3172.34	2977.77	186852	7.83176e+06	-3172.34	2977.77	2977.77	0	0	0	0	0
	16125	186848	7.83189e+06	-3169.46	2973.53	186848	7.83189e+06	-3169.46	2973.53	2973.53	0	0	0	0	0
	16250	186848	7.83202e+06	-3166.09	2968.58	186848	7.83202e+06	-3166.09	2968.58	2968.58	0	0	0	0	0
	16375	186872	7.83214e+06	-3161.1	2961.27	186875	7.83214e+06	-3163.67	2965.03	2963.15	3.76727	3.77196	44.9643	0.784775	5.33104
	16500	186903	7.83226e+06	-3160.38	2960.21	186914	7.83226e+06	-3167.07	2970.02	2965.12	9.81074	11.1844	41.2566	0.720064	14.8775
	16625	186941	7.83238e+06	-3156.38	2954.36	186951	7.83238e+06	-3161.92	2962.47	2958.41	8.11264	10.0954	38.7854	0.676933	12.9511
	16750	186995	7.8325e+06	-3158.25	2957.09	187001	7.8325e+06	-3162.27	2962.98	2960.04	5.88884	6.37297	42.739	0.745936	8.67717
	16875	186975	7.83263e+06	-3157.27	2955.66	186982	7.83263e+06	-3160.75	2960.75	2958.21	5.0958	6.41523	38.4611	0.671273	8.19283
	17000	187075	7.83274e+06	-3155.01	2952.35	187081	7.83274e+06	-3159	2958.19	2955.27	5.83892	6.14232	43.5494	0.760081	8.47473
	17125	187236	7.83285e+06	-3150.4	2945.61	187237	7.83285e+06	-3150.39	2945.6	2945.61	-0.0146035	0.876926	0	0	0.877048
	17250	187147	7.83298e+06	-3143.94	2936.19	187156	7.83298e+06	-3148.95	2943.5	2939.84	7.30725	9.20723	38.437	0.670853	11.7545
	17375	187166	7.83311e+06	-3140.89	2931.75	187171	7.83311e+06	-3143.94	2936.19	2933.97	4.44288	5.40552	39.4173	0.687962	6.99705
	17500	187154	7.83324e+06	-3135.72	2924.23	187166	7.83323e+06	-3142.51	2934.11	2929.17	9.88056	11.5875	40.454	0.706055	15.2281
	17625	187172	7.83336e+06	-3132.64	2919.75	187181	7.83336e+06	-3138.19	2927.82	2923.78	8.06672	9.20723	41.2225	0.719469	12.2411
	17750	187221	7.83348e+06	-3130.41	2916.51	187233	7.83348e+06	-3136.74	2925.71	2921.11	9.19506	12.3851	36.5913	0.638639	15.4253
	17875	187319	7.83359e+06	-3132.42	2919.43	187327	7.83359e+06	-3136.84	2925.85	2922.64	6.42271	8.31048	37.6985	0.657962	10.5031
	18000	187264	7.83373e+06	-3128.47	2913.7	187272	7.83372e+06	-3132.64	2919.75	2916.73	6.05162	7.28223	39.727	0.693367	9.46853
	18125	187216	7.83386e+06	-3130.29	2916.34	187223	7.83386e+06	-3131.64	2918.3	2917.32	1.95941	6.70667	16.2862	0.284248	6.98704
	18250	187239	7.83398e+06	-3126.84	2911.34	187251	7.83398e+06	-3136.35	2925.14	2918.24	13.8057	12.5351	47.7616	0.833598	18.6475
	18375	187245	7.83411e+06	-3127.13	2911.76	187258	7.8341e+06	-3134.59	2922.58	2917.17	10.8272	12.8589	40.0974	0.699832	16.8101
	18500	187268	7.83423e+06	-3124.98	2908.64	187281	7.83423e+06	-3133.7	2921.29	2914.97	12.6498	13.1417	43.9074	0.766329	18.2407
	18625	187300	7.83435e+06	-3123.05	2905.85	187312	7.83435e+06	-3130.57	2916.75	2911.3	10.9003	12.1122	41.9854	0.732784	16.2948
	18750	187407	7.83446e+06	-3122.43	2904.95	187411	7.83446e+06	-3125.11	2908.83	2906.89	3.88093	3.60081	47.1442	0.822822	5.29409
	18875	187483	7.83458e+06	-3120.5	2902.16	187483	7.83458e+06	-3120.5	2902.16	2902.16	0	0	0	0	0
HC	0	183846	7.81602e+06	-3272.06	3126.68	183852	7.81602e+06	-3273.82	3129.35	3128.02	2.66938	6.13241	23.523	0.410554	6.6882
	125	183846	7.81615e+06	-3268.74	3121.65	183859	7.81614e+06	-3277.16	3134.42	3128.04	12.7706	13.8574	42.6628	0.744605	18.8445
	250	183926	7.81626e+06	-3274.19	3129.91	183941	7.81626e+06	-3282.44	3142.45	3136.18	12.5331	14.1799	41.4723	0.723828	18.9248
	375	184002	7.81638e+06	-3280.95	3140.18	184017	7.81637e+06	-3289.73	3153.55	3146.86	13.3666	15.8134	40.2068	0.701741	20.7058
	500	184051	7.8165e+06	-3283.8	3144.52	184070	7.81649e+06	-3296.03	3163.16	3153.84	18.6446	18.9913	44.4722	0.776186	26.6137
	625	184061	7.81662e+06	-3288.29	3151.35	184082	7.81662e+06	-3302.05	3172.36	3161.86	21.0103	21.4311	44.432	0.775484	30.0121
	750	184132	7.81674e+06	-3293.11	3158.7	184151	7.81674e+06	-3305.11	3177.05	3167.88	18.3447	19.6052	43.0975	0.752194	26.8494
	875	184164	7.81686e+06	-3297.95	3166.09	184183	7.81686e+06	-3308.41	3182.1	3174.1	16.01	18.7283	40.5257	0.707306	24.6388
	1000	184191	7.81698e+06	-3293.55	3159.37	184204	7.81698e+06	-3302.68	3173.33	3166.35	13.9531	13.0003	47.0244	0.820731	19.0708
	1125	184254	7.8171e+06	-3295.01	3161.6	184272	7.8171e+06	-3309	3183.01	3172.31	21.4054	17.7298	50.3655	0.879045	27.7946
	1250	184331	7.81722e+06	-3294.88	3161.4	184350	7.81721e+06	-3308.66	3182.49	3171.95	21.0826	19.6561	47.0055	0.820401	28.8243
	1375	184329	7.81734e+06	-3305.14	3177.09	184347	7.81734e+06	-3315.68	3193.26	3185.18	16.1675	17.8415	42.1821	0.736216	24.0771
	1500	184335	7.81747e+06	-3306.46	3179.12	184349	7.81747e+06	-3317.11	3195.46	3187.29	16.343	13.2323	51.0042	0.890192	21.0282
	1625	184400	7.81759e+06	-3312.61	3188.55	184416	7.81758e+06	-3326.16	3209.39	3198.97	20.8405	16.8417	51.0575	0.891122	26.7949
	1750	184433	7.81771e+06	-3312.31	3188.09	184463	7.8177e+06	-3328.39	3212.83	3200.46	24.7389	29.5393	39.9458	0.697186	38.5303
	1875	184358	7.81784e+06	-3306.03	3178.46	184372	7.81784e+06	-3314.6	3191.6	3185.03	13.1453	14.0993	42.9946	0.750398	19.2766
	2000	184313	7.81797e+06	-3303.06	3173.91	184327	7.81797e+06	-3312.27	3188.03	3180.97	14.1158	14.3312	44.5661	0.777824	20.1156
	2125	184204	7.81812e+06	-3294.25	3160.44	184219	7.81811e+06	-3304.21	3175.67	3168.06	15.2266	14.9154	45.5916	0.795723	21.3148
	2250	184220	7.81824e+06	-3290.59	3154.86	184232	7.81824e+06	-3299.53	3168.51	3161.68	13.6501	12.6977	47.0703	0.821532	18.6429
	2375	184195	7.81837e+06	-3285.66	3147.35	184214	7.81837e+06	-3296.04	3163.18	3155.26	15.8287	18.9913	39.8103	0.69482	24.7228
	2500	184313	7.81848e+06	-3278.76	3136.85	184336	7.81848e+06	-3294.92	3161.47	3149.16	24.613	22.9232	47.0358	0.82093	33.6344
	2625	184376	7.8186e+06	-3279.67	3138.24	184401	7.81859e+06	-3293.63	3159.5	3148.87	21.261	25.3246	40.0148	0.698389	33.0661
	2750	184432	7.81872e+06	-3286.62	3148.81	184443	7.81871e+06	-3294.42	3160.7	3154.76	11.8932	11.5776	45.7705	0.798846	16.5979
	2875	184472	7.81884e+06	-3294.84	3161.34	184492	7.81883e+06	-3303.18	3174.09	3167.72	12.7492	19.7169	32.8871	0.573989	23.4797
	3000	184464	7.81896e+06	-3293.66	3159.54	184482	7.81896e+06	-3308.62	3182.43	3170.98	22.8836	18.6874	50.7641	0.886	29.5445
	3125	184443	7.81909e+06	-3294.04	3160.12	184474	7.81909e+06	-3310.51	3185.32	3172.72	25.202	31.0724	39.0446	0.681456	40.008
	3250	184456	7.81922e+06	-3295.56	3162.44	184499	7.81921e+06	-3311.54	3186.9	3174.67	24.4616	42.8509	29.72	0.518712	49.3414
	3375	184503	7.81934e+06	-3296.21	3163.44	184543	7.81933e+06	-3311.99	3187.6	3175.52	24.1594	40.6233	30.7408	0.536527	47.2645
	3500	184462	7.81947e+06	-3303.47	3174.54	184481	7.81947e+06	-3314.97	3192.17	3183.35	17.6338	19.4737	42.1613	0.735854	26.2712
	3625	184495	7.81959e+06	-3308.22	3181.81	184515	7.81959e+06	-3320.01	3199.92	3190.87	18.105	19.8768	42.3291	0.738781	26.8864
	3750	184509	7.81971e+06	-3314.08	3190.8	184530	7.81971e+06	-3326.33	3209.65	3200.23	18.8457	21.5117	41.2205	0.719433	28.5992
	3875	184498	7.81984e+06	-3313.04	3189.21	184526	7.81984e+06	-3331.9	3218.24	3203.72	29.0343	28.5818	45.4499	0.793251	40.742
	4000	184394	7.81998e+06	-3316.1	3193.91	184405	7.81998e+06	-3323.9	3205.91	3199.91	11.9989	11.3258	46.6531	0.81425	16.5
	4125	184380	7.82011e+06	-3315.87	3193.55	184386	7.82011e+06	-3323.67	3205.55	3199.55	11.9981	6.74633	60.6517	1.05857	13.7647
	4250	184361	7.82024e+06	-3313.7	3190.22	184367	7.82024e+06	-3320.88	3201.26	3195.74	11.0362	6.09144	61.1035	1.06646	12.6057
	4375	184494	7.82035e+06	-3314.06	3190.77	184508	7.82034e+06	-3322.12	3203.16	3196.97	12.3918	14.2407	41.0289	0.716089	18.8774
	4500	184550	7.82047e+06	-3314.51	3191.46	184568	7.82046e+06	-3326.91	3210.54	3201	19.0793	18.2955	46.2014	0.806367	26.4338
	4625	184608	7.82058e+06	-3314.73	3191.8	184624	7.82058e+06	-3329.14	3213.98	3202.89	22.1801	16.2178	53.8261	0.939443	27.4768
	4750	184604	7.82071e+06	-3317.76	3196.46	184622	7.82071e+06	-3333.52	3220.74	3208.6	24.2849	18.4964	52.7056	0.919887	30.5266
	4875	184585	7.82084e+06	-3322.25	3203.36	184605	7.82084e+06	-3335.02	3223.06	3213.21	19.6951	20.4127	43.975	0.767508	28.3651
	5000	184625	7.82096e+06	-3322.08	3203.1	184639	7.82096e+06	-3333.95	3221.41	3212.26	18.3037	14.3114	51.9787	0.907199	23.2345
	5125	184681	7.82108e+06	-3325.34	3208.12	184696	7.82108e+06	-3337.75	3227.28	3217.7	19.1565	15.0171	51.9064	0.905938	24.341
	5250	184696	7.8212e+06	-3328.39	3212.83	184712	7.8212e+06	-3340.6	3231.69	3222.26	18.8643	16.6197	48.6197	0.848573	25.1411
	5375	184711	7.82133e+06	-3330.35	3215.85	184732	7.82132e+06	-3345.73	3239.64	3227.74	23.787	21.472	47.9281	0.836503	32.0448
	5500	184761	7.82145e+06	-3334.75	3222.64	184779	7.82144e+06	-3346.75	3241.22	3231.93	18.5744	18.6787	44.8395	0.782597	26.342
	5625	184771	7.82157e+06	-3331.58	3217.75	184789	7.82157e+06	-3345.44	3239.19	3228.47	21.4392	18.0226	49.9483	0.871763	28.008
	5750	184763	7.8217e+06	-3327.25	3211.07	184779	7.8217e+06	-3339.95	3230.68	3220.88	19.6162	15.5418	51.6103	0.90077	25.0268
	5875	184802	7.82182e+06	-3325.03	3207.65	184820	7.82182e+06	-3339.36	3229.77	3218.71	22.1246	18.6887	49.8122	0.869386	28.9614
	6000	184806	7.82194e+06	-3322.96	3204.46	184818	7.82194e+06	-3331.81	3218.1	3211.28	13.6442	12.0428	48.5675	0.847663	18.1987
	6125	184838	7.82207e+06	-3321.8	3202.67	184849	7.82207e+06	-3329.93	3215.2	3208.94	12.5285	10.4786	50.0915	0.874261	16.333
	6250	184881	7.82219e+06	-3321.46	3202.15	184893	7.82219e+06	-3329.05	3213.84	3208	11.6942	11.4375	45.636	0.796498	16.3576
	6375	184863	7.82232e+06	-3319.85	3199.67	184872	7.82231e+06	-3323.93	3205.95	3202.81	6.27992	9.60042	33.1899	0.579273	11.4719
	6500	184876	7.82244e+06	-3316.9	3195.14	184882	7.82244e+06	-3321.8	3202.67	3198.9	7.53634	6.0617	51.1892	0.893421	9.67164
	6625	184909	7.82256e+06	-3317.24	3195.66	184915	7.82256e+06	-3321.65	3202.44	3199.05	6.7829	6.21303	47.5108	0.82922	9.19833
	6750	184963	7.82268e+06	-3306.44	3179.09	184977	7.82268e+06	-3316.34	3194.28	3186.68	15.1902	13.9268	47.4846	0.828762	20.6082
	6875	184961	7.82281e+06	-3299.15	3167.93	184980	7.8228e+06	-3311.67	3187.1	3177.52	19.1759	19.403	44.6626	0.77951	27.2799
	7000	184971	7.82293e+06	-3298.08	3166.29	184989	7.82293e+06	-3309.47	3183.73	3175.01	17.4366	18.0523	44.006	0.76805	25.0982
	7125	184982	7.82306e+06	-3297.57	3165.51	184991	7.82306e+06	-3301.2	3171.06	3168.29	5.54972	9.46892	30.3745	0.530135	10.9754
	7250	185041	7.82317e+06	-3298.36	3166.72	185048	7.82317e+06	-3301.06	3170.85	3168.78	4.1283	7.03907	30.3909	0.530421	8.16035
	7375	185039	7.8233e+06	-3297.31	3165.12	185049	7.8233e+06	-3301.83	3172.03	3168.57	6.91078	10.852	32.4899	0.567055	12.8656
	7500	185091	7.82342e+06	-3299.41	3168.33	185100	7.82342e+06	-3304.27	3175.76	3172.04	7.43569	8.85499	40.0208	0.698494	11.5629
	7625	185123	7.82354e+06	-3300.58	3170.11	185129	7.82354e+06	-3304.31	3175.82	3172.97	5.70785	5.6573	45.2549	0.789847	8.03645
	7750	185159	7.82366e+06	-3299.28	3168.13	185180	7.82366e+06	-3310.6	3185.46	3176.79	17.3355	21.5315	38.8383	0.677856	27.6428
	7875	185172	7.82379e+06	-3300.57	3170.1	185185	7.82379e+06	-3307	3179.94	3175.02	9.8435	12.5252	38.1636	0.666081	15.9303
	8000	185172	7.82391e+06	-3297.62	3165.59	185180	7.82391e+06	-3302.9	3173.66	3169.63	8.07445	8.09836	44.9153	0.78392	11.4359
	8125	185131	7.82405e+06	-3296.58	3164	185140	7.82404e+06	-3302.45	3172.98	3168.49	8.97469	9.68104	42.8317	0.747554	13.201
	8250	185158	7.82417e+06	-3296.11	3163.28	185168	7.82417e+06	-3301.99	3172.27	3167.78	8.98873	9.60171	43.1115	0.752437	13.1526
	8375	185128	7.8243e+06	-3293.49	3159.28	185138	7.8243e+06	-3298.88	3167.52	3163.4	8.23256	10.0954	39.1966	0.684109	13.0266
	8500	185071	7.82443e+06	-3292.18	3157.28	185077	7.82443e+06	-3296.73	3164.23	3160.76	6.94595	6.74763	45.8297	0.79988	9.68384
	8625	185149	7.82455e+06	-3290.53	3154.77	185154	7.82455e+06	-3293.27	3158.95	3156.86	4.17962	5.15374	39.0416	0.681405	6.63553
	8750	185253	7.82466e+06	-3292.39	3157.6	185263	7.82466e+06	-3295.35	3162.12	3159.86	4.51789	10.7714	22.7549	0.397147	11.6805
	8875	185228	7.82479e+06	-3281.45	3140.94	185242	7.82479e+06	-3289.15	3152.66	3146.8	11.7223	13.5845	40.7914	0.711945	17.943
	9000	185269	7.82491e+06	-3279.45	3137.9	185273	7.82491e+06	-3282.7	3142.84	3140.37	4.9414	3.40852	55.4025	0.966957	6.00295
	9125	185293	7.82503e+06	-3274.33	3130.13	185305	7.82503e+06	-3282.43	3142.43	3136.28	12.3055	12.1432	45.3802	0.792033	17.2882
	9250	185266	7.82516e+06	-3272.19	3126.88	185281	7.82516e+06	-3279.86	3138.52	3132.7	11.6439	14.552	38.6654	0.674839	18.637
	9375	185286	7.82529e+06	-3273.27	3128.52	185292	7.82529e+06	-3279.42	3137.86	3133.19	9.33727	6.11128	56.7951	0.991262	11.1594
	9500	185307	7.82541e+06	-3273.99	3129.61	185319	7.82541e+06	-3281.08	3140.38	3134.99	10.7683	12.586	40.5496	0.707724	16.5639
	9625	185408	7.82552e+06	-3271.91	3126.46	185428	7.82552e+06	-3285.51	3147.12	3136.79	20.6631	20.4028	45.3631	0.791735	29.0386
	9750	185416	7.82565e+06	-3276	3132.66	185431	7.82565e+06	-3283.69	3144.35	3138.51	11.6878	14.9253	38.0639	0.66434	18.957
	9875	185471	7.82577e+06	-3270.88	3124.89	185488	7.82576e+06	-3282.37	3142.34	3133.62	17.4462	17.4272	45.0313	0.785945	24.6592
	10000	185493	7.82589e+06	-3271.2	3125.38	185507	7.82589e+06	-3278.7	3136.76	3131.07	11.3821	14.1191	38.874	0.67848	18.1356
	10125	185582	7.826e+06	-3268.14	3120.74	185595	7.826e+06	-3276.44	3133.33	3127.04	12.5861	13.8462	42.2705	0.73776	18.7116
	10250	185620	7.82612e+06	-3266.64	3118.47	185633	7.82612e+06	-3274.54	3130.45	3124.46	11.9733	13.4741	41.6248	0.72649	18.0253
	10375	185654	7.82625e+06	-3267.08	3119.14	185665	7.82624e+06	-3273.92	3129.5	3124.32	10.3665	11.5888	41.8135	0.729783	15.5488
	10500	185688	7.82637e+06	-3266.59	3118.4	185705	7.82637e+06	-3275.99	3132.65	3125.52	14.2498	16.9633	40.0315	0.698681	22.1542
	10625	185696	7.82649e+06	-3268.92	3121.92	185709	7.82649e+06	-3276.67	3133.68	3127.8	11.7538	12.4545	43.3421	0.756463	17.125
	10750	185691	7.82662e+06	-3268.42	3121.17	185709	7.82662e+06	-3280.54	3139.56	3130.36	18.3909	17.9208	45.7417	0.798343	25.6784
	10875	185734	7.82674e+06	-3269.95	3123.49	185743	7.82674e+06	-3276.59	3133.56	3128.52	10.0718	9.4603	46.7933	0.816697	13.8181
	11000	185750	7.82686e+06	-3267.8	3120.23	185770	7.82686e+06	-3275.91	3132.52	3126.38	12.2963	19.6759	32.003	0.558557	23.2022
	11125	185748	7.82699e+06	-3266.84	3118.77	185756	7.82699e+06	-3272.34	3127.11	3122.94	8.33333	8.65279	43.9225	0.766593	12.0131
	11250	185766	7.82711e+06	-3266.31	3117.97	185779	7.82711e+06	-3270.44	3124.23	3121.1	6.25526	13.1616	25.4202	0.443667	14.5724
	11375	185860	7.82723e+06	-3267.57	3119.88	185869	7.82723e+06	-3272.42	3127.23	3123.55	7.34938	9.18869	38.6538	0.674637	11.7663
	11500	185942	7.82734e+06	-3266.28	3117.93	185952	7.82734e+06	-3271.2	3125.38	3121.65	7.45262	9.9949	36.7097	0.640706	12.4675
	11625	185944	7.82747e+06	-3266.57	3118.37	185953	7.82747e+06	-3270.95	3125	3121.68	6.63469	8.90587	36.6853	0.64028	11.1056
	11750	185938	7.8276e+06	-3271.22	3125.41	185938	7.8276e+06	-3271.22	3125.41	3125.41	0	0	0	0	0
	11875	185971	7.82772e+06	-3274.9	3130.99	185978	7.82772e+06	-3276.78	3133.85	3132.42	2.85388	6.97958	22.2392	0.388147	7.5405
	12000	186089	7.82783e+06	-3275.75	3132.28	186097	7.82783e+06	-3277.58	3135.06	3133.67	2.77868	7.71639	19.804	0.345645	8.20144
	12125	186030	7.82796e+06	-3278.43	3136.35	186032	7.82796e+06	-3280.24	3139.1	3137.73	2.75053	1.44257	62.3244	1.08777	3.10587
	12250	185927	7.8281e+06	-3282.89	3143.13	185927	7.8281e+06	-3282.89	3143.13	3143.13	0	0	0	0	0
	12375	186048	7.82821e+06	-3278.63	3136.66	186048	7.82821e+06	-3278.63	3136.66	3136.66	0	0	0	0	0
	12500	186143	7.82833e+06	-3278.43	3136.35	186145	7.82833e+06	-3281.72	3141.35	3138.85	5.0007	2.33932	64.9299	1.13324	5.52082
	12625	186194	7.82844e+06	-3277.95	3135.62	186207	7.82844e+06	-3281.38	3140.84	3138.23	5.21285	13.5336	21.0656	0.367664	14.5029
	12750	186224	7.82857e+06	-3274.69	3130.67	186233	7.82857e+06	-3279.7	3138.28	3134.48	7.60842	9.34864	39.1405	0.683131	12.0534
	12875	186241	7.82869e+06	-3275.22	3131.48	186249	7.82869e+06	-3279.22	3137.55	3134.51	6.07463	8.1294	36.7686	0.641734	10.1483
	13000	186250	7.82882e+06	-3274.01	3129.64	186254	7.82882e+06	-3275.49	3131.89	3130.76	2.24593	4.80151	25.0681	0.437521	5.30082
	13125	186336	7.82893e+06	-3272.58	3127.47	186336	7.82893e+06	-3272.58	3127.47	3127.47	0	0	0	0	0
	13250	186399	7.82905e+06	-3268.56	3121.38	186410	7.82905e+06	-3274.52	3130.41	3125.9	9.03564	11.265	38.733	0.676019	14.441
	13375	186451	7.82917e+06	-3266.3	3117.96	186463	7.82917e+06	-3272.28	3127.02	3122.49	9.05977	11.8802	37.3289	0.651511	14.9405
	13500	186448	7.82929e+06	-3265.2	3116.29	186458	7.82929e+06	-3269.28	3122.47	3119.38	6.17741	10.0246	31.6423	0.552262	11.7751
	13625	186447	7.82942e+06	-3265.18	3116.26	186447	7.82942e+06	-3265.18	3116.26	3116.26	0	0	0	0	0
	13750	186474	7.82954e+06	-3263.47	3113.68	186474	7.82954e+06	-3263.47	3113.68	3113.68	0	0	0	0	0
	13875	186494	7.82967e+06	-3260.98	3109.91	186504	7.82966e+06	-3265.73	3117.09	3113.5	7.18335	9.84358	36.1201	0.630415	12.1859
	14000	186508	7.82979e+06	-3258.16	3105.65	186516	7.82979e+06	-3262.02	3111.48	3108.57	5.83162	7.75475	36.9434	0.644784	9.70278
	14125	186536	7.82991e+06	-3258.11	3105.58	186541	7.82991e+06	-3260.42	3109.07	3107.32	3.48903	5.56806	32.0719	0.55976	6.57089
	14250	186558	7.83004e+06	-3257.24	3104.26	186565	7.83004e+06	-3262.2	3111.76	3108.01	7.49264	6.94853	47.1577	0.823058	10.2187
	14375	186609	7.83016e+06	-3254.28	3099.8	186614	7.83015e+06	-3257.71	3104.97	3102.38	5.17553	5.31498	44.2384	0.772106	7.41856
	14500	186633	7.83028e+06	-3252.4	3096.96	186639	7.83028e+06	-3256.08	3102.51	3099.74	5.54978	5.92029	43.1499	0.753108	8.11479
	14625	186627	7.83041e+06	-3251.65	3095.83	186630	7.8304e+06	-3254.15	3099.6	3097.72	3.76869	2.92479	52.1858	0.910815	4.77048
	14750	186667	7.83053e+06	-3251.83	3096.1	186679	7.83052e+06	-3254.81	3100.6	3098.35	4.49286	11.4672	21.3953	0.373418	12.316
	14875	186764	7.83064e+06	-3249.17	3092.1	186776	7.83064e+06	-3253.78	3099.04	3095.57	6.94645	11.2948	31.5921	0.551387	13.2599
	15000	186748	7.83077e+06	-3246.2	3087.63	186757	7.83077e+06	-3252.36	3096.9	3092.26	9.27581	9.24818	45.0854	0.786889	13.0985
	15125	186759	7.83089e+06	-3245.26	3086.21	186771	7.83089e+06	-3252.57	3097.22	3091.72	11.0063	12.2635	41.9074	0.731421	16.4782
	15250	186748	7.83102e+06	-3246.6	3088.23	186762	7.83102e+06	-3254.99	3100.87	3094.55	12.6396	13.7867	42.5145	0.742019	18.7038
	15375	186790	7.83114e+06	-3248.15	3090.56	186804	7.83114e+06	-3255.67	3101.89	3096.23	11.3328	13.9579	39.0742	0.681973	17.9793
	15500	186805	7.83126e+06	-3249.33	3092.34	186810	7.83126e+06	-3252.93	3097.76	3095.05	5.42399	5.68834	43.6372	0.761614	7.85982
	15625	186845	7.83139e+06	-3242.34	3081.82	186859	7.83138e+06	-3251.11	3095.02	3088.42	13.1957	13.9169	43.4762	0.758803	19.1783
	15750	186919	7.8315e+06	-3242.79	3082.5	186930	7.8315e+06	-3250.07	3093.45	3087.98	10.9528	11.4064	43.8377	0.765112	15.8136
	15875	186912	7.83163e+06	-3238.32	3075.79	186926	7.83163e+06	-3246.47	3088.03	3081.91	12.2466	13.4246	42.3727	0.739543	18.1713
	16000	186962	7.83175e+06	-3239.67	3077.81	186968	7.83175e+06	-3243.07	3082.92	3080.37	5.1074	5.62755	42.226	0.736982	7.59966
	16125	186966	7.83187e+06	-3237.89	3075.14	186973	7.83187e+06	-3240.43	3078.95	3077.05	3.81295	6.69675	29.656	0.517595	7.70617
	16250	186980	7.832e+06	-3233.37	3068.36	186988	7.832e+06	-3237.7	3074.86	3071.61	6.49281	8.50146	37.37	0.652229	10.6973
	16375	186986	7.83212e+06	-3227.84	3060.08	187004	7.83212e+06	-3235.18	3071.08	3065.58	10.9927	17.7906	31.7116	0.553473	20.9128
	16500	187012	7832246	-3226.08	3057.45	187019	7.83225e+06	-3230.65	3064.29	3060.87	6.83762	7.64438	41.8115	0.729748	10.2562
	16625	187072	7.83236e+06	-3228.29	3060.76	187072	7.83236e+06	-3228.29	3060.76	3060.76	0	0	0	0	0
	16750	187101	7.83249e+06	-3225.35	3056.36	187107	7.83249e+06	-3229.75	3062.94	3059.65	6.58162	6.97958	43.3191	0.756061	9.59334
	16875	187062	7.83262e+06	-3224.76	3055.48	187066	7.83262e+06	-3228.67	3061.32	3058.4	5.84716	3.994	55.6644	0.971527	7.08105
	17000	187171	7.83273e+06	-3222.17	3051.61	187177	7.83273e+06	-3227.72	3059.9	3055.76	8.29517	6.91879	50.1694	0.875621	10.8018
	17125	187336	7.83283e+06	-3217.77	3045.04	187336	7.83283e+06	-3217.77	3045.04	3045.04	0	0	0	0	0
	17250	187268	7.83297e+06	-3210.43	3034.11	187280	7.83297e+06	-3214.34	3039.93	3037.02	5.8214	12.545	24.8932	0.434468	13.8299
	17375	187273	7.83309e+06	-3206.96	3028.95	187279	7.83309e+06	-3211.14	3035.16	3032.06	6.21698	6.78729	42.4889	0.741571	9.20425
	17500	187272	7.83322e+06	-3204.38	3025.11	187275	7.83322e+06	-3207.47	3029.71	3027.41	4.59137	3.37877	53.6508	0.936383	5.70059
	17625	187283	7.83335e+06	-3199.74	3018.23	187290	7.83334e+06	-3204.52	3025.32	3021.78	7.09417	7.63446	42.8991	0.748731	10.4217
	17750	187353	7.83346e+06	-3198.1	3015.8	187353	7.83346e+06	-3198.1	3015.8	3015.8	0	0	0	0	0
	17875	187433	7.83358e+06	-3195	3011.2	187440	7.83358e+06	-3197.49	3014.89	3013.05	3.68876	6.81704	28.4182	0.495991	7.75106
	18000	187376	7.83371e+06	-3192.71	3007.81	187381	7.83371e+06	-3195.86	3012.48	3010.15	4.66366	5.48614	40.3673	0.704541	7.20052
	18125	187342	7.83384e+06	-3194.17	3009.97	187346	7.83384e+06	-3197.68	3015.17	3012.57	5.1993	4.17507	51.2353	0.894225	6.66813
	18250	187344	7.83397e+06	-3194.63	3010.66	187350	7.83397e+06	-3198.04	3015.71	3013.18	5.05182	6.33331	38.5779	0.673311	8.10134
	18375	187347	7.83409e+06	-3194.83	3010.95	187352	7.83409e+06	-3198.32	3016.12	3013.54	5.17072	5.12399	45.2601	0.789937	7.27954
	18500	187366	7.83422e+06	-3191.52	3006.05	187374	7.83422e+06	-3194.21	3010.03	3008.04	3.98087	7.77587	27.1102	0.473163	8.73564
	18625	187420	7.83434e+06	-3196.18	3012.95	187422	7.83434e+06	-3199.36	3017.66	3015.31	4.71318	2.01683	66.8333	1.16646	5.12656
	18750	187510	7.83445e+06	-3192.74	3007.86	187516	7.83445e+06	-3195.26	3011.59	3009.72	3.7306	6.0617	31.6097	0.551694	7.1177
	18875	187584	7.83457e+06	-3192.04	3006.82	187584	7.83457e+06	-3192.04	3006.82	3006.82	0	0	0	0	0
HB	0	183905	7.81601e+06	-3303.92	3175.23	183918	7.81601e+06	-3311.4	3186.69	3180.96	11.4642	13.1913	40.9931	0.715465	17.4768
	125	183909	7.81614e+06	-3307.42	3180.59	183919	7.81614e+06	-3313.65	3190.14	3185.37	9.55666	10.2579	42.9732	0.750023	14.0198
	250	183987	7.81625e+06	-3311.12	3186.26	183997	7.81625e+06	-3315.83	3193.49	3189.88	7.23139	10.7007	34.0504	0.594291	12.915
	375	184065	7.81637e+06	-3316.3	3194.21	184082	7.81637e+06	-3325.69	3208.66	3201.44	14.4492	16.9137	40.5069	0.706979	22.2453
	500	184109	7.81649e+06	-3321.71	3202.53	184120	7.81649e+06	-3328.57	3213.1	3207.82	10.5691	10.661	44.7521	0.781071	15.0121
	625	184120	7.81661e+06	-3326.55	3209.99	184138	7.81661e+06	-3338.47	3228.39	3219.19	18.4054	18.577	44.7342	0.780759	26.1508
	750	184193	7.81673e+06	-3330.97	3216.81	184217	7.81673e+06	-3345.33	3239.02	3227.91	22.2102	23.4479	43.4472	0.758297	32.297
	875	184213	7.81685e+06	-3328.48	3212.96	184239	7.81685e+06	-3345.96	3239.99	3226.48	27.0283	26.4335	45.6375	0.796524	37.8056
	1000	184241	7.81698e+06	-3332	3218.4	184259	7.81697e+06	-3346.07	3240.16	3229.28	21.7674	17.9816	50.4406	0.880354	28.234
	1125	184292	7.8171e+06	-3324.87	3207.4	184324	7.81709e+06	-3350.11	3246.43	3226.91	39.0303	32.0002	50.6523	0.88405	50.4716
	1250	184373	7.81721e+06	-3324.86	3207.38	184405	7.81721e+06	-3349.8	3245.95	3226.67	38.5646	32.3538	50.005	0.872752	50.3388
	1375	184379	7817336	-3336.75	3225.73	184395	7.81733e+06	-3348.09	3243.3	3234.51	17.5615	16.1571	47.3851	0.827026	23.8633
	1500	184376	7.81746e+06	-3339.05	3229.29	184385	7.81746e+06	-3344.11	3237.13	3233.21	7.83414	9.27793	40.1772	0.701225	12.1431
	1625	184433	7.81758e+06	-3339.87	3230.56	184452	7.81758e+06	-3354.82	3253.75	3242.15	23.1859	18.577	51.2977	0.895313	29.7101
	1750	184495	7.8177e+06	-3348.23	3243.51	184509	7.8177e+06	-3356.42	3256.23	3249.87	12.7206	13.6862	42.9058	0.748847	18.6849
	1875	184427	7.81783e+06	-3347.98	3243.12	184436	7.81783e+06	-3353.44	3251.6	3247.36	8.47635	8.98519	43.3308	0.756266	12.3524
	2000	184371	7.81797e+06	-3340.82	3232.03	184388	7.81797e+06	-3351.82	3249.08	3240.56	17.0547	17.1146	44.8996	0.783645	24.1614
	2125	184264	7.81811e+06	-3334.51	3222.27	184281	7.81811e+06	-3346.15	3240.29	3231.28	18.0149	17.4371	45.9338	0.801696	25.0717
	2250	184275	7.81823e+06	-3329.9	3215.15	184295	7.81823e+06	-3344.05	3237.03	3226.09	21.8778	20.12	47.3966	0.827227	29.7229
	2375	184245	7.81836e+06	-3320.49	3200.66	184273	7.81836e+06	-3339.86	3230.54	3215.6	29.888	28.8944	45.9684	0.8023	41.5714
	2500	184374	7.81847e+06	-3321.76	3202.61	184399	7.81847e+06	-3340.15	3230.99	3216.8	28.3824	26.1011	47.3977	0.827246	38.5594
	2625	184468	7.81859e+06	-3330.78	3216.51	184477	7.81858e+06	-3336.03	3224.62	3220.57	8.10857	9.51118	40.4486	0.705961	12.4985
	2750	184498	7.81871e+06	-3331.45	3217.55	184504	7.81871e+06	-3335.51	3223.82	3220.68	6.27077	6.03066	46.1182	0.804915	8.70008
	2875	184553	7.81883e+06	-3342.92	3235.28	184559	7.81883e+06	-3349.09	3244.85	3240.06	9.56524	6.34322	56.4495	0.98523	11.4774
	3000	184521	7.81896e+06	-3340.08	3230.88	184537	7.81895e+06	-3351.68	3248.87	3239.88	17.9826	15.8643	48.5812	0.847901	23.9802
	3125	184519	7.81908e+06	-3335.33	3223.54	184559	7.81908e+06	-3356.15	3255.81	3239.68	32.2743	41.1169	38.1298	0.665491	52.2708
	3250	184547	7.81921e+06	-3338.94	3229.12	184577	7.8192e+06	-3353.18	3251.2	3240.16	22.0764	30.0343	36.3174	0.633857	37.275
	3375	184589	7.81933e+06	-3340	3230.76	184615	7.81932e+06	-3354.01	3252.49	3241.62	21.7259	26.8676	38.9599	0.679979	34.5526
	3500	184552	7.81946e+06	-3348.96	3244.65	184575	7.81945e+06	-3360.1	3261.96	3253.3	17.3138	23.4578	36.4304	0.63583	29.1554
	3625	184573	7.81958e+06	-3354.89	3253.85	184591	7.81958e+06	-3365.66	3270.62	3262.24	16.7672	18.164	42.7102	0.745433	24.7198
	3750	184585	7.8197e+06	-3357.95	3258.61	184613	7.8197e+06	-3373.95	3283.56	3271.09	24.9512	28.108	41.5952	0.725973	37.5849
	3875	184569	7.81983e+06	-3360.03	3261.85	184596	7.81983e+06	-3378.32	3290.4	3276.12	28.5495	27.7036	45.8615	0.800435	39.7814
	4000	184470	7.81997e+06	-3356.65	3256.59	184510	7.81997e+06	-3376.43	3287.44	3272.02	30.8513	39.8468	37.7488	0.65884	50.3942
	4125	184465	7.8201e+06	-3358.65	3259.7	184486	7.8201e+06	-3371.44	3279.64	3269.67	19.9401	21.2797	43.1385	0.752909	29.1622
	4250	184430	7.82023e+06	-3354.22	3252.81	184454	7.82023e+06	-3365.4	3270.22	3261.51	17.4031	23.8821	36.0812	0.629736	29.5503
	4375	184571	7.82034e+06	-3360.46	3262.52	184587	7.82033e+06	-3368.8	3275.52	3269.02	13.0008	16.126	38.8757	0.678509	20.714
	4500	184618	7.82046e+06	-3360.92	3263.24	184634	7.82045e+06	-3371.59	3279.88	3271.56	16.6409	15.744	46.5863	0.813084	22.9084
	4625	184661	7.82058e+06	-3361.94	3264.82	184674	7.82058e+06	-3374.24	3284.02	3274.42	19.1934	13.8376	54.2101	0.946144	23.6614
	4750	184654	7.8207e+06	-3361.03	3263.41	184668	7.8207e+06	-3373.31	3282.56	3272.99	19.157	14.4118	53.0458	0.925823	23.9727
	4875	184643	7.82083e+06	-3365.35	3270.14	184657	7.82083e+06	-3375.85	3286.54	3278.34	16.3967	14.5024	48.5082	0.846628	21.89
	5000	184678	7.82095e+06	-3368.21	3274.6	184693	7.82095e+06	-3379.25	3291.86	3283.23	17.2558	15.1473	48.723	0.850377	22.961
	5125	184736	7.82107e+06	-3366.63	3272.13	184760	7.82107e+06	-3385.54	3301.71	3286.92	29.5774	24.3757	50.5069	0.881512	38.3275
	5250	184752	7.8212e+06	-3369.98	3277.36	184777	7.82119e+06	-3388.63	3306.56	3291.96	29.1983	25.1931	49.2114	0.858902	38.5647
	5375	184772	7.82132e+06	-3374.47	3284.38	184788	7.82132e+06	-3386.33	3302.95	3293.66	18.5739	16.5602	48.2804	0.842651	24.8843
	5500	184820	7.82144e+06	-3377.7	3289.43	184840	7.82144e+06	-3387.41	3304.65	3297.04	15.2164	19.6958	37.6887	0.657792	24.889
	5625	184830	7.82156e+06	-3376.68	3287.83	184842	7.82156e+06	-3385.99	3302.42	3295.13	14.5844	12.1122	50.2907	0.877737	18.9581
	5750	184814	7.82169e+06	-3369.16	3276.08	184832	7.82169e+06	-3383.71	3298.84	3287.46	22.7602	17.8204	51.9404	0.906531	28.9066
	5875	184856	7.82181e+06	-3366.47	3271.89	184883	7.82181e+06	-3387.33	3304.52	3288.2	32.6352	27.2099	50.18	0.875806	42.4904
	6000	184861	7.82194e+06	-3363.75	3267.64	184886	7.82193e+06	-3382.01	3296.18	3281.91	28.5338	24.8198	48.982	0.854898	37.8179
	6125	184891	7.82206e+06	-3363.25	3266.87	184910	7.82206e+06	-3377.77	3289.54	3278.2	22.6737	18.7171	50.4604	0.8807	29.4011
	6250	184943	7.82218e+06	-3362.62	3265.88	184975	7.82217e+06	-3379.93	3292.92	3279.4	27.0365	32.0709	40.1316	0.700429	41.9466
	6375	184927	7.82231e+06	-3359.74	3261.4	184946	7.8223e+06	-3372.42	3281.17	3271.29	19.7746	19.5259	45.3626	0.791726	27.7902
	6500	184927	7.82243e+06	-3357.94	3258.6	184952	7.82243e+06	-3378.28	3290.34	3274.47	31.7395	25.1918	51.5607	0.899905	40.5219
	6625	184954	7.82256e+06	-3353.47	3251.65	184970	7.82255e+06	-3367.17	3272.98	3262.31	21.329	16.8628	51.67	0.901811	27.1897
	6750	185020	7.82267e+06	-3346.83	3241.34	185047	7.82267e+06	-3366.17	3271.42	3256.38	30.0758	27.1987	47.8757	0.835589	40.5503
	6875	185032	7.8228e+06	-3345.36	3239.06	185052	7.82279e+06	-3358.53	3259.52	3249.29	20.4532	20.4127	45.0567	0.786388	28.8966
	7000	185036	7.82292e+06	-3339.44	3229.89	185062	7.82292e+06	-3355.53	3254.85	3242.37	24.955	25.4052	44.4878	0.776458	35.6115
	7125	185054	7.82305e+06	-3339.61	3230.16	185078	7.82304e+06	-3355.91	3255.44	3242.8	25.2828	23.3474	47.279	0.825174	34.414
	7250	185109	7.82317e+06	-3339.96	3230.7	185128	7.82316e+06	-3354.65	3253.48	3242.09	22.7824	19.1513	49.9491	0.871776	29.7626
	7375	185102	7.82329e+06	-3338.87	3229.01	185114	7.82329e+06	-3347.27	3242.02	3235.52	13.011	12.5774	45.9709	0.802344	18.0963
	7500	185156	7.82341e+06	-3340.53	3231.58	185172	7.82341e+06	-3350.95	3247.73	3239.66	16.1527	16.2364	44.8519	0.782814	22.9026
	7625	185187	7.82353e+06	-3342.74	3235	185200	7.82353e+06	-3351.29	3248.26	3241.63	13.2589	13.0598	45.4334	0.792962	18.6107
	7750	185241	7.82365e+06	-3342.51	3234.65	185267	7.82365e+06	-3354.36	3253.03	3243.84	18.3841	27.0586	34.1929	0.596778	32.7131
	7875	185242	7.82378e+06	-3343.76	3236.58	185257	7.82378e+06	-3353.05	3251	3243.79	14.4124	14.6041	44.6214	0.77879	20.5182
	8000	185239	7.82391e+06	-3344.53	3237.78	185259	7.8239e+06	-3354.76	3253.65	3245.71	15.8765	19.9488	38.5149	0.672212	25.4955
	8125	185202	7.82404e+06	-3341.56	3233.18	185218	7.82403e+06	-3350.05	3246.34	3239.76	13.1611	16.5701	38.4591	0.671237	21.1609
	8250	185226	7824159	-3337.94	3227.57	185240	7.82416e+06	-3346.69	3241.12	3234.35	13.5501	14.2916	43.4746	0.758774	19.694
	8375	185214	7.82429e+06	-3340.3	3231.23	185224	7.82429e+06	-3345.05	3238.58	3234.9	7.35657	10.1066	36.0509	0.629206	12.5005
	8500	185137	7.82442e+06	-3334.01	3221.5	185148	7.82442e+06	-3341.05	3232.39	3226.94	10.8866	11.2749	43.996	0.767875	15.6729
	8625	185222	7.82454e+06	-3334.53	3222.3	185234	7.82454e+06	-3342.49	3234.62	3228.46	12.3128	12.5054	44.5555	0.77764	17.5496
	8750	185333	7.82465e+06	-3335	3223.03	185342	7.82465e+06	-3339.77	3230.41	3226.72	7.37594	9.20723	38.6984	0.675414	11.7974
	8875	185306	7.82478e+06	-3325.62	3208.56	185324	7.82478e+06	-3336.1	3224.73	3216.64	16.174	18.4765	41.1983	0.719045	24.5557
	9000	185336	7.8249e+06	-3321.12	3201.63	185349	7.8249e+06	-3328.59	3213.13	3207.38	11.508	12.4558	42.735	0.745866	16.9582
	9125	185360	7.82502e+06	-3319.01	3198.38	185378	7.82502e+06	-3325.75	3208.76	3203.57	10.3757	18.0027	29.9566	0.522841	20.7787
	9250	185331	7.82515e+06	-3314.5	3191.45	185348	7.82515e+06	-3324.72	3207.17	3199.31	15.7199	17.034	42.7025	0.745299	23.1791
	9375	185344	7.82528e+06	-3315.56	3193.08	185364	7.82528e+06	-3328.35	3212.76	3202.92	19.6867	20.161	44.3181	0.773497	28.1785
	9500	185362	7.8254e+06	-3319	3198.36	185379	7.8254e+06	-3325.95	3209.06	3203.71	10.6993	16.9732	32.2258	0.562447	20.064
	9625	185479	7.82551e+06	-3319.82	3199.63	185493	7.82551e+06	-3329.33	3214.28	3206.95	14.6495	14.2605	45.7709	0.798852	20.4443
	9750	185483	7.82564e+06	-3317.61	3196.23	185501	7.82564e+06	-3329.34	3214.29	3205.26	18.0633	18.1739	44.8252	0.782347	25.6237
	9875	185535	7.82576e+06	-3313.84	3190.44	185553	7.82576e+06	-3325.45	3208.29	3199.36	17.8581	17.5884	45.4359	0.793006	25.0652
	10000	185556	7.82588e+06	-3313.54	3189.97	185574	7.82588e+06	-3321.68	3202.49	3196.23	12.513	17.71	35.2432	0.61511	21.6845
	10125	185651	7.82599e+06	-3310.22	3184.88	185667	7.82599e+06	-3319.83	3199.64	3192.26	14.7613	16.0355	42.6309	0.744049	21.7953
	10250	185685	7.82612e+06	-3304.89	3176.71	185704	7.82611e+06	-3316.54	3194.58	3185.65	17.8718	19.8894	41.9416	0.732019	26.7392
	10375	185720	7.82624e+06	-3306.45	3179.1	185738	7.82624e+06	-3317.42	3195.94	3187.52	16.8348	18.577	42.1834	0.736239	25.0702
	10500	185769	7.82636e+06	-3311.83	3187.35	185783	7.82636e+06	-3318.45	3197.52	3192.43	10.1689	13.5039	36.9811	0.645443	16.9045
	10625	185764	7826484	-3311.2	3186.38	185781	7.82648e+06	-3322.2	3203.29	3194.84	16.9049	17.6789	43.7178	0.76302	24.4606
	10750	185751	7.82661e+06	-3310.25	3184.93	185771	7.82661e+06	-3322.74	3204.12	3194.52	19.1936	20.311	43.3798	0.75712	27.9451
	10875	185798	7.82673e+06	-3312.11	3187.78	185812	7.82673e+06	-3320.84	3201.19	3194.49	13.4154	13.5845	44.6413	0.779137	19.0922
	11000	185820	7.82685e+06	-3312.19	3187.9	185834	7.82685e+06	-3320.89	3201.27	3194.59	13.3696	13.7966	44.0995	0.769681	19.2118
	11125	185821	7.82698e+06	-3313.53	3189.96	185831	7.82698e+06	-3319.84	3199.66	3194.81	9.69722	9.9242	44.3373	0.773831	13.8754
	11250	185838	7.8271e+06	-3313.83	3190.42	185850	7.8271e+06	-3320.65	3200.9	3195.66	10.4827	12.5166	39.9464	0.697196	16.3264
	11375	185946	7.82722e+06	-3314.99	3192.2	185965	7.82721e+06	-3325.65	3208.6	3200.4	16.4001	19.253	40.4251	0.705551	25.2912
	11500	186037	7.82733e+06	-3315.51	3193	186050	7.82733e+06	-3322.58	3203.87	3198.44	10.8729	12.7882	40.3721	0.704626	16.7856
	11625	186038	7.82746e+06	-3313.99	3190.67	186054	7.82745e+06	-3322.99	3204.5	3197.58	13.8387	16.0143	40.8317	0.712648	21.1653
	11750	186012	7.82759e+06	-3315.38	3192.8	186022	7.82758e+06	-3320.73	3201.03	3196.91	8.22526	10.0458	39.3099	0.686086	12.9836
	11875	186055	7.82771e+06	-3315.77	3193.4	186071	7.8277e+06	-3324.11	3206.23	3199.81	12.8294	16.5205	37.832	0.660294	20.917
	12000	186179	7.82782e+06	-3318.11	3197	186201	7.82781e+06	-3329.24	3214.14	3205.57	17.1404	22.0364	37.8766	0.661071	27.9176
	12125	186126	7.82795e+06	-3319.99	3199.89	186145	7827947	-3326.89	3210.51	3205.2	10.6254	19.1922	28.9702	0.505625	21.9372
	12250	186056	7.82808e+06	-3323.62	3205.47	186070	7.82808e+06	-3327.81	3211.93	3208.7	6.4566	14.4019	24.1474	0.421452	15.783
	12375	186158	7.8282e+06	-3321.04	3201.5	186168	7.8282e+06	-3324.66	3207.08	3204.29	5.57349	10.0048	29.1213	0.508263	11.4525
	12500	186218	7.82832e+06	-3318.19	3197.12	186231	7.82831e+06	-3325.03	3207.65	3202.38	10.5272	13.716	37.5067	0.654616	17.2902
	12625	186277	7.82843e+06	-3319.47	3199.09	186286	7.82843e+06	-3323.84	3205.81	3202.45	6.72581	9.58058	35.0698	0.612084	11.7057
	12750	186300	7828557	-3316.12	3193.94	186308	7.82856e+06	-3320.49	3200.66	3197.3	6.71908	8.15915	39.4716	0.688909	10.5697
	12875	186314	7.82868e+06	-3314.69	3191.74	186323	7.82868e+06	-3319.46	3199.07	3195.41	7.3314	9.66121	37.193	0.649141	12.128
	13000	186330	7.82881e+06	-3315.34	3192.74	186341	7.8288e+06	-3320.68	3200.95	3196.84	8.20978	11.043	36.6285	0.639289	13.7604
	13125	186408	7.82892e+06	-3313.03	3189.19	186421	7.82892e+06	-3320.98	3201.41	3195.3	12.2187	13.8871	41.3433	0.721576	18.4973
	13250	186475	7.82904e+06	-3309.86	3184.33	186491	7.82904e+06	-3318.55	3197.67	3191	13.3449	16.1062	39.6437	0.691913	20.9164
	13375	186531	7.82916e+06	-3305.47	3177.6	186552	7.82915e+06	-3315.89	3193.58	3185.59	15.9847	21.4707	36.6673	0.639964	26.7676
	13500	186535	7.82928e+06	-3305.05	3176.96	186555	7.82928e+06	-3313.97	3190.63	3183.8	13.6789	19.5259	35.0131	0.611094	23.8406
	13625	186532	7.82941e+06	-3304.04	3175.41	186544	7.82941e+06	-3310.97	3186.03	3180.72	10.6208	11.9807	41.5568	0.725302	16.0106
	13750	186565	7.82953e+06	-3304.17	3175.61	186584	7.82953e+06	-3312.36	3188.16	3181.89	12.5547	18.2334	34.5496	0.603004	22.1377
	13875	186575	7.82966e+06	-3304.11	3175.52	186590	7.82965e+06	-3310	3184.54	3180.03	9.02569	15.9945	29.436	0.513755	18.3654
	14000	186592	7.82978e+06	-3300.28	3169.66	186598	7.82978e+06	-3304.85	3176.65	3173.15	6.99352	6.07032	49.0423	0.855949	9.26057
	14125	186613	7.8299e+06	-3298.45	3166.86	186625	7.8299e+06	-3304.96	3176.82	3171.84	9.95975	12.4049	38.7605	0.676499	15.9084
	14250	186625	7.83003e+06	-3298.18	3166.45	186639	7.83003e+06	-3306.86	3179.73	3173.09	13.2829	14.5222	42.448	0.740857	19.6807
	14375	186680	7.83015e+06	-3297.92	3166.05	186682	7.83015e+06	-3302.09	3172.42	3169.24	6.37649	2.11729	71.6315	1.25021	6.71882
	14500	186698	7.83027e+06	-3296.27	3163.53	186707	7.83027e+06	-3299.04	3167.76	3165.64	4.23271	9.49005	24.0376	0.419535	10.3912
	14625	186691	7.8304e+06	-3293.6	3159.45	186696	7.8304e+06	-3297.28	3165.07	3162.26	5.61949	5.66851	44.7512	0.781055	7.9819
	14750	186746	7.83052e+06	-3292.9	3158.38	186754	7.83051e+06	-3296.11	3163.28	3160.83	4.9004	8.04878	31.3346	0.546893	9.42321
	14875	186860	7.83063e+06	-3292.73	3158.12	186866	7.83063e+06	-3295.84	3162.87	3160.5	4.74743	5.69825	39.7989	0.694623	7.41675
	15000	186812	7.83076e+06	-3289.34	3152.95	186821	7.83076e+06	-3294.86	3161.37	3157.16	8.42076	8.28073	45.4804	0.793782	11.8102
	15125	186829	7.83088e+06	-3287.6	3150.3	186844	7.83088e+06	-3294	3160.06	3155.18	9.75937	14.583	33.7916	0.589775	17.5473
	15250	186818	7.83101e+06	-3289.43	3153.09	186831	7.83101e+06	-3297.62	3165.59	3159.34	12.4992	13.4629	42.8742	0.748295	18.3706
	15375	186854	7831132	-3288.67	3151.93	186863	7.83113e+06	-3294.79	3161.27	3156.6	9.33502	8.74333	46.8746	0.818116	12.7902
	15500	186860	7.83126e+06	-3288.28	3151.34	186870	7.83126e+06	-3295.37	3162.15	3156.75	10.8149	10.0954	46.9708	0.819795	14.7945
	15625	186914	7.83138e+06	-3286.43	3148.52	186924	7.83137e+06	-3292.74	3158.14	3153.33	9.61861	10.0147	43.8441	0.765225	13.8857
	15750	186990	7.83149e+06	-3290.22	3154.3	187008	7.83149e+06	-3299.54	3168.52	3161.41	14.2296	17.8911	38.4968	0.671896	22.8598
	15875	186989	7.83162e+06	-3286.8	3149.08	187006	7.83162e+06	-3295.82	3162.84	3155.96	13.7567	17.6802	37.8859	0.661235	22.4018
	16000	187032	7.83174e+06	-3282.28	3142.2	187058	7.83174e+06	-3291.25	3155.87	3149.03	13.6617	25.9696	27.7474	0.484283	29.3439
	16125	187041	7.83186e+06	-3280.13	3138.93	187063	7.83186e+06	-3292.95	3158.46	3148.7	19.5241	22.3688	41.1154	0.717599	29.691
	16250	187063	7.83199e+06	-3276.35	3133.19	187078	7.83199e+06	-3283.81	3144.53	3138.86	11.339	14.6438	37.7514	0.658886	18.5206
	16375	187069	7.83211e+06	-3276.69	3133.71	187081	7.83211e+06	-3282.85	3143.07	3138.39	9.36216	11.4659	39.2323	0.684733	14.8026
	16500	187088	7.83224e+06	-3272.28	3127.02	187094	7.83224e+06	-3275.38	3131.72	3129.37	4.70301	5.17487	42.2651	0.737665	6.99268
	16625	187148	7.83235e+06	-3270.79	3124.76	187155	7.83235e+06	-3272.18	3126.87	3125.81	2.10727	6.76746	17.2957	0.301867	7.08795
	16750	187173	7.83248e+06	-3270.63	3124.52	187173	7.83248e+06	-3270.63	3124.52	3124.52	0	0	0	0	0
	16875	187117	7.83261e+06	-3267.42	3119.65	187124	7.83261e+06	-3271.97	3126.55	3123.1	6.89415	7.23136	43.6325	0.761531	9.99109
	17000	187224	7.83272e+06	-3265.53	3116.79	187231	7.83272e+06	-3271.01	3125.09	3120.94	8.2997	6.82825	50.5555	0.88236	10.7476
	17125	187349	7.83296e+06	-3254.94	3100.79	187360	7.83296e+06	-3260.94	3109.85	3105.32	9.05877	11.0331	39.3879	0.687449	14.2755
	17250	187335	7.83309e+06	-3244.67	3085.32	187351	7.83308e+06	-3255.61	3101.8	3093.56	16.4779	16.4782	44.9994	0.785388	23.3035
	17375	187333	7.83321e+06	-3241.25	3080.18	187347	7.83321e+06	-3249.67	3092.85	3086.52	12.6642	14.3709	41.3877	0.722352	19.1547
	17500	187349	7.83334e+06	-3239.13	3077	187358	7.83334e+06	-3245.59	3086.71	3081.85	9.707	8.94553	47.3377	0.826199	13.2003
	17625	187419	7.83345e+06	-3235.6	3071.71	187432	7.83345e+06	-3243.49	3083.55	3077.63	11.8455	13.0909	42.1411	0.7355	17.6547
	17750	187511	7.83357e+06	-3235.64	3071.77	187517	7.83357e+06	-3238.73	3076.4	3074.08	4.63578	5.80862	38.5929	0.673573	7.43173
	17875	187458	7.8337e+06	-3237.2	3074.11	187465	7.8337e+06	-3240.93	3079.7	3076.9	5.59916	7.49305	36.7688	0.641737	9.35395
	18000	187423	7.83383e+06	-3237.08	3073.93	187425	7.83383e+06	-3238.56	3076.15	3075.04	2.22081	1.73401	52.0172	0.907871	2.81758
	18125	187429	7.83396e+06	-3237.81	3075.02	187431	7.83396e+06	-3240	3078.31	3076.66	3.28728	2.0677	57.8301	1.00933	3.88351
	18250	187410	7.83408e+06	-3237.74	3074.92	187413	7.83408e+06	-3239.2	3077.11	3076.01	2.19123	2.51048	41.1156	0.717602	3.33227
	18375	187446	7.83421e+06	-3235.56	3071.65	187450	7.83421e+06	-3238.84	3076.57	3074.11	4.92085	4.90196	45.1102	0.787321	6.94579
	18500	187477	7.83433e+06	-3231.94	3066.22	187478	7.83433e+06	-3234.15	3069.53	3067.88	3.31135	1.55293	64.8747	1.13228	3.65741
	18625	187564	7.83444e+06	-3227.09	3058.96	187567	7.83444e+06	-3228.79	3061.5	3060.23	2.5432	3.43956	36.4791	0.63668	4.27767
	18750	187631	7.83456e+06	-3225.51	3056.6	187631	7.83456e+06	-3225.51	3056.6	3056.6	0	0	0	0	0
HA	0	184020	7.816e+06	-3369.52	3276.64	184036	7.81599e+06	-3378.61	3290.85	3283.75	14.2093	16.5093	40.7182	0.710666	21.7821
	125	184021	7.81612e+06	-3377.28	3288.77	184030	7.81612e+06	-3381.87	3295.96	3292.37	7.18664	9.00632	38.5883	0.673493	11.5222
	250	184108	7.81624e+06	-3382	3296.16	184123	7.81623e+06	-3386.96	3303.94	3300.05	7.77714	15.1883	27.1146	0.473239	17.0637
	375	184182	7.81635e+06	-3383.55	3298.59	184201	7.81635e+06	-3395.16	3316.82	3307.71	18.2302	19.9488	42.4225	0.740412	27.024
	500	184214	7.81648e+06	-3389.94	3308.62	184225	7.81647e+06	-3396.64	3319.15	3313.88	10.5325	10.398	45.3683	0.791826	14.8004
	625	184225	7.8166e+06	-3394.6	3315.94	184240	7.8166e+06	-3404.22	3331.09	3323.52	15.1499	14.9564	45.3684	0.791828	21.2888
	750	184301	7.81672e+06	-3398.34	3321.83	184315	7.81671e+06	-3405.89	3333.73	3327.78	11.8994	13.907	40.5517	0.707761	18.303
	875	184324	7.81684e+06	-3403.15	3329.4	184343	7.81684e+06	-3415.32	3348.62	3339.01	19.2207	18.5274	46.0522	0.803763	26.6965
	1000	184330	7.81696e+06	-3401.34	3326.55	184343	7.81696e+06	-3412.46	3344.1	3335.33	17.5505	13.3129	52.8179	0.921846	22.0284
	1125	184381	7.81708e+06	-3395.48	3317.33	184398	7.81708e+06	-3409.01	3338.65	3327.99	21.3252	17.2957	50.9564	0.889357	27.4573
	1250	184467	7.8172e+06	-3398.69	3322.38	184483	7.8172e+06	-3407.75	3336.66	3329.52	14.2839	16.8727	40.2501	0.702497	22.107
	1375	184473	7.81732e+06	-3401.7	3327.12	184482	7.81732e+06	-3409.38	3339.23	3333.18	12.1164	9.07703	53.1612	0.927837	15.1393
	1500	184465	7.81745e+06	-3411.66	3342.84	184486	7.81745e+06	-3428.35	3369.28	3356.06	26.442	20.7352	51.8973	0.905779	33.6025
	1625	184469	7.81758e+06	-3416.78	3350.93	184482	7.81757e+06	-3430.07	3372.01	3361.47	21.0763	13.7061	56.9638	0.994205	25.1409
	1750	184486	7.8177e+06	-3418.1	3353.02	184503	7.8177e+06	-3432.67	3376.14	3364.58	23.1194	17.1754	53.3913	0.931854	28.801
	1875	184523	7.81782e+06	-3409.01	3338.65	184523	7.81782e+06	-3409.01	3338.65	3338.65	0	0	0	0	0
	2000	184473	7.81795e+06	-3406.17	3334.17	184481	7.81795e+06	-3411.8	3343.06	3338.61	8.89111	7.38268	50.2956	0.877825	11.5566
	2125	184361	7.81809e+06	-3399.88	3324.25	184367	7.81809e+06	-3403.81	3330.44	3327.35	6.1935	5.42665	48.7757	0.851296	8.23456
	2250	184370	7.81822e+06	-3396.21	3318.47	184379	7.81822e+06	-3402.34	3328.13	3323.3	9.65336	9.18739	46.4167	0.810125	13.3265
	2375	184349	7.81835e+06	-3391.06	3310.38	184367	7.81835e+06	-3403.36	3329.73	3320.06	19.358	18.345	46.539	0.812259	26.6697
	2500	184458	7.81846e+06	-3380.04	3293.09	184487	7.81846e+06	-3398.47	3322.03	3307.56	28.9382	29.3471	44.5981	0.778383	41.2149
	2625	184537	7.81858e+06	-3376.93	3288.22	184555	7.81857e+06	-3388.94	3307.05	3297.64	18.8228	17.4371	47.1886	0.823596	25.6583
	2750	184570	7.8187e+06	-3380.4	3293.66	184590	7.8187e+06	-3393.96	3314.93	3304.3	21.2785	20.1411	46.573	0.812851	29.2992
	2875	184600	7.81882e+06	-3392.14	3312.07	184612	7.81882e+06	-3404.68	3331.82	3321.95	19.7427	11.2042	60.4245	1.05461	22.7004
	3000	184583	7.81895e+06	-3389.92	3308.59	184608	7.81894e+06	-3409.96	3340.15	3324.37	31.5646	25.0405	51.5747	0.900148	40.2908
	3125	184627	7.81907e+06	-3392.16	3312.11	184658	7.81906e+06	-3408.93	3338.52	3325.31	26.4187	31.6381	39.8629	0.695739	41.2179
	3250	184661	7.81919e+06	-3393.71	3314.54	184702	7.81918e+06	-3412.93	3344.84	3329.69	30.3029	40.5129	36.7958	0.642208	50.5921
	3375	184704	7.81931e+06	-3400.38	3325.04	184735	7.81931e+06	-3417.1	3351.44	3338.24	26.403	32.0709	39.4635	0.688768	41.5411
	3500	184690	7.81944e+06	-3415.18	3348.4	184713	7.81944e+06	-3425.82	3365.26	3356.83	16.8594	22.3899	36.9794	0.645413	28.0276
	3625	184691	7.81956e+06	-3425.45	3364.68	184701	7.81956e+06	-3431.17	3373.76	3369.22	9.08406	9.64137	43.2952	0.755645	13.2467
	3750	184708	7.81969e+06	-3428.12	3368.91	184721	7.81969e+06	-3435.88	3381.25	3375.08	12.337	12.7572	44.0408	0.768656	17.7467
	3875	184673	7.81982e+06	-3429.45	3371.03	184693	7.81982e+06	-3438.51	3385.44	3378.23	14.412	20.4722	35.1447	0.613391	25.0363
	4000	184615	7.81995e+06	-3429.15	3370.55	184632	7.81995e+06	-3437.64	3384.05	3377.3	13.503	17.1047	38.2888	0.668265	21.7922
	4125	184611	7.82008e+06	-3430.64	3372.92	184633	7.82008e+06	-3440.44	3388.51	3380.72	15.5962	21.9954	35.3391	0.616784	26.9637
	4250	184597	7.82021e+06	-3425.92	3365.42	184624	7.8202e+06	-3437.56	3383.93	3374.67	18.5041	27.7148	33.7295	0.588691	33.3243
	4375	184690	7.82032e+06	-3428.96	3370.25	184705	7.82032e+06	-3438	3384.63	3377.44	14.3781	15.5108	42.8298	0.74752	21.1498
	4500	184716	7.82044e+06	-3428.01	3368.74	184731	7.82044e+06	-3437.9	3384.47	3376.6	15.7277	14.5929	47.1433	0.822806	21.4549
	4625	184737	7.82057e+06	-3430.09	3372.04	184748	7.82057e+06	-3440.58	3388.74	3380.39	16.6933	11.7996	54.7455	0.955489	20.4425
	4750	184738	7.82069e+06	-3434.06	3378.35	184748	7.82069e+06	-3443.12	3392.79	3385.57	14.4312	10.2057	54.7321	0.955256	17.6753
	4875	184727	7.82082e+06	-3433.66	3377.72	184748	7.82082e+06	-3446.66	3398.43	3388.08	20.7164	20.3321	45.5364	0.79476	29.027
	5000	184762	7.82094e+06	-3436.61	3382.41	184775	7.82094e+06	-3447.65	3400.02	3391.21	17.603	13.3228	52.8798	0.922927	22.0763
	5125	184823	7.82106e+06	-3439.34	3386.76	184844	7.82106e+06	-3456.06	3413.46	3400.11	26.7025	21.3306	51.3812	0.896772	34.1763
	5250	184850	7.82118e+06	-3443.16	3392.85	184854	7.82118e+06	-3446.62	3398.37	3395.61	5.52128	3.87242	54.9556	0.959157	6.7439
	5375	184870	7.82131e+06	-3445.99	3397.37	184874	7.82131e+06	-3448.54	3401.44	3399.4	4.07194	4.1949	44.1478	0.770525	5.84618
	5500	184915	7.82143e+06	-3446.3	3397.86	184915	7.82143e+06	-3446.3	3397.86	3397.86	0	0	0	0	0
	5625	184912	7.82155e+06	-3440.98	3389.37	184927	7.82155e+06	-3452.42	3407.64	3398.51	18.2648	14.8757	50.839	0.887309	23.5561
	5750	184898	7.82168e+06	-3437.65	3384.07	184917	7.82168e+06	-3453.34	3409.11	3396.59	25.0416	19.212	52.5044	0.916375	31.5624
	5875	184949	7.8218e+06	-3439.1	3386.38	184967	7.8218e+06	-3453.98	3410.13	3398.26	23.756	18.2135	52.5229	0.916697	29.9346
	6000	184956	7.82193e+06	-3434.33	3378.78	184979	7.82192e+06	-3450.88	3405.18	3391.98	26.3922	22.5003	49.5512	0.864832	34.6816
	6125	184982	7.82205e+06	-3432	3375.08	185000	7.82205e+06	-3445.21	3396.12	3385.6	21.0416	17.9618	49.5149	0.864199	27.6654
	6250	185038	7.82217e+06	-3434.2	3378.58	185057	7822164	-3447.24	3399.36	3388.97	20.7835	19.635	46.6277	0.813807	28.5917
	6375	185022	7.82229e+06	-3422.94	3360.69	185039	7.82229e+06	-3434.33	3378.78	3369.74	18.0904	17.1655	46.5028	0.811628	24.9383
	6500	185003	7.82242e+06	-3422.23	3359.57	185019	7.82242e+06	-3433.34	3377.21	3368.39	17.6414	16.5899	46.7594	0.816105	24.2166
	6625	185034	7.82255e+06	-3421.08	3357.75	185049	7.82254e+06	-3431.46	3374.22	3365.98	16.475	15.0568	47.5752	0.830344	22.3189
	6750	185097	7.82266e+06	-3407.29	3335.93	185113	7.82266e+06	-3420.36	3356.6	3346.27	20.6697	16.0863	52.1079	0.909455	26.1918
	6875	185117	7.82279e+06	-3404.52	3331.56	185146	7.82278e+06	-3425.43	3364.64	3348.1	33.0794	29.3992	48.371	0.844234	44.2557
	7000	185133	7.82291e+06	-3402.3	3328.06	185161	7.82291e+06	-3418.51	3353.67	3340.87	25.61	28.2494	42.1945	0.736432	38.1301
	7125	185146	7.82303e+06	-3401.33	3326.54	185172	7.82303e+06	-3415.92	3349.57	3338.05	23.0387	25.9299	41.621	0.726424	34.6863
	7250	185199	7.82315e+06	-3402.37	3328.17	185226	7.82315e+06	-3421.1	3357.78	3342.98	29.6028	28.0373	46.5558	0.812552	40.7727
	7375	185201	7.82328e+06	-3405.76	3333.52	185210	7.82328e+06	-3411.8	3343.06	3338.29	9.53803	9.0559	46.4853	0.811322	13.1523
	7500	185260	7.8234e+06	-3408.03	3337.1	185277	7.8234e+06	-3418.77	3354.09	3345.59	16.9828	16.7511	45.3935	0.792265	23.8541
	7625	185299	7.82352e+06	-3415.71	3349.24	185307	7.82352e+06	-3418.7	3353.97	3351.61	4.73322	7.87633	31.0035	0.541112	9.18912
	7750	185355	7.82364e+06	-3418.73	3354.02	185373	7.82364e+06	-3428.15	3368.96	3361.49	14.939	18.1428	39.4684	0.688854	23.5019
	7875	185353	7.82376e+06	-3415.09	3348.26	185374	7.82376e+06	-3428.5	3369.52	3358.89	21.2566	21.0577	45.2692	0.790097	29.921
	8000	185343	7.82389e+06	-3411.03	3341.84	185367	7.82389e+06	-3425.73	3365.12	3353.48	23.2783	23.9118	44.2309	0.771974	33.3714
	8125	185320	7.82402e+06	-3412.28	3343.82	185338	7.82402e+06	-3423.51	3361.6	3352.71	17.7808	18.5261	43.8241	0.764874	25.6783
	8250	185351	7.82414e+06	-3416.03	3349.75	185363	7.82414e+06	-3422.16	3359.46	3354.6	9.70922	12.4743	37.8949	0.661391	15.8075
	8375	185350	7.82427e+06	-3416.87	3351.08	185357	7.82427e+06	-3421.28	3358.06	3354.57	6.9849	7.22144	44.0461	0.768749	10.0468
	8500	185254	7.82441e+06	-3406.73	3335.05	185270	7.82441e+06	-3415.62	3349.1	3342.07	14.0484	16.6309	40.1884	0.701419	21.7702
	8625	185340	7.82452e+06	-3408.36	3337.62	185349	7.82452e+06	-3412.18	3343.66	3340.64	6.03495	8.60321	35.0487	0.611716	10.5088
	8750	185456	7.82463e+06	-3403.76	3330.37	185469	7.82463e+06	-3411.47	3342.54	3336.45	12.1711	12.7373	43.6977	0.762669	17.6174
	8875	185441	7.82476e+06	-3403.27	3329.59	185449	7.82476e+06	-3407.97	3337.01	3333.3	7.41515	8.27943	41.848	0.730385	11.1146
	9000	185460	7.82488e+06	-3396.15	3318.38	185471	7.82488e+06	-3402.84	3328.92	3323.65	10.5359	11.1434	43.3948	0.757382	15.3356
	9125	185477	7.82501e+06	-3394	3315	185478	7.82501e+06	-3398.44	3321.98	3318.49	6.98576	1.05929	81.3776	1.42031	7.06562
	9250	185441	7.82514e+06	-3388.98	3307.11	185456	7.82514e+06	-3396.45	3318.85	3312.98	11.741	14.6748	38.6626	0.674789	18.7937
	9375	185456	7.82526e+06	-3390.61	3309.67	185468	7.82526e+06	-3399.07	3322.98	3316.32	13.3053	12.586	46.5914	0.813174	18.315
	9500	185470	7.82539e+06	-3391.82	3311.57	185478	7.82539e+06	-3398.23	3321.65	3316.61	10.0818	8.91578	48.5122	0.846697	13.4586
	9625	185589	7.8255e+06	-3393.81	3314.7	185596	7.8255e+06	-3398.54	3322.14	3318.42	7.44194	7.09986	46.3476	0.808918	10.2854
	9750	185598	7.82562e+06	-3392.59	3312.78	185607	7.82562e+06	-3398.61	3322.25	3317.52	9.46997	9.33872	45.3998	0.792376	13.3001
	9875	185647	7.82574e+06	-3388.28	3306.01	185656	7.82574e+06	-3394.3	3315.47	3310.74	9.45804	9.1266	46.0217	0.80323	13.1434
	10000	185673	7.82587e+06	-3383.33	3298.25	185680	7.82586e+06	-3387.54	3304.85	3301.55	6.60301	6.858	43.9148	0.766458	9.52007
	10125	185771	7.82598e+06	-3382.38	3296.76	185781	7.82598e+06	-3388.34	3306.11	3301.43	9.34752	9.95394	43.2004	0.75399	13.6549
	10250	185810	7.8261e+06	-3380.29	3293.48	185828	7.8261e+06	-3390.72	3309.84	3301.66	16.3589	17.416	43.2073	0.75411	23.8941
	10375	185849	7.82622e+06	-3382.94	3297.64	185864	7.82622e+06	-3391.92	3311.73	3304.68	14.0926	15.3297	42.5922	0.743375	20.8231
	10500	185896	7.82634e+06	-3385.76	3302.06	185905	7.82634e+06	-3390.93	3310.17	3306.11	8.1156	9.3288	41.0217	0.715963	12.3649
	10625	185885	7.82647e+06	-3387.54	3304.85	185894	7.82647e+06	-3393.03	3313.47	3309.16	8.62282	8.82395	44.3395	0.77387	12.3375
	10750	185864	7.8266e+06	-3386.27	3302.86	185876	7.8266e+06	-3394.2	3315.31	3309.08	12.455	11.7289	46.7197	0.815413	17.1083
	10875	185910	7.82672e+06	-3385.77	3302.07	185925	7.82672e+06	-3395.88	3317.95	3310.01	15.8817	14.9564	46.7187	0.815395	21.8156
	11000	185934	7.82684e+06	-3385.16	3301.12	185950	7.82684e+06	-3395.22	3316.92	3309.02	15.8002	15.6621	45.2515	0.789787	22.2474
	11125	185931	7.82697e+06	-3384.45	3300	185943	7.82696e+06	-3391.93	3311.74	3305.87	11.7412	11.75	44.9784	0.785021	16.6108
	11250	185944	7.82709e+06	-3381.25	3294.99	185967	7.82709e+06	-3396.04	3318.21	3306.6	23.2186	23.1664	45.0645	0.786524	32.7992
	11375	186070	7.8272e+06	-3390.89	3310.11	186082	7.8272e+06	-3398.07	3321.4	3315.76	11.291	12.4347	42.2404	0.737234	16.7961
	11500	186170	7.82731e+06	-3389.59	3308.07	186183	7.82731e+06	-3396.73	3319.29	3313.68	11.2238	12.8986	41.0285	0.716082	17.0982
	11625	186169	7.82744e+06	-3387.69	3305.09	186183	7.82744e+06	-3395.46	3317.29	3311.19	12.2085	13.907	41.2788	0.720452	18.5054
	11750	186138	7.82757e+06	-3384.67	3300.35	186155	7.82757e+06	-3394.63	3315.99	3308.17	15.6407	18.0933	40.8417	0.712822	23.9165
	11875	186187	7.82769e+06	-3386.97	3303.96	186201	7.82769e+06	-3394.43	3315.67	3309.81	11.7184	14.0682	39.7933	0.694524	18.3094
	12000	186330	7.8278e+06	-3395.54	3317.42	186338	7.8278e+06	-3399.16	3323.12	3320.27	5.69748	8.48163	33.891	0.591509	10.2176
	12125	186302	7.82793e+06	-3392.31	3312.34	186315	7.82792e+06	-3397.35	3320.27	3316.3	7.92656	12.8887	31.5916	0.551378	15.131
	12250	186301	7.82805e+06	-3388.33	3306.09	186321	7.82805e+06	-3396.87	3319.51	3312.8	13.4224	20.1696	33.6428	0.587177	24.2275
	12375	186334	7.82817e+06	-3391.65	3311.3	186341	7.82817e+06	-3394.71	3316.11	3313.71	4.81023	7.55384	32.4887	0.567035	8.95538
	12500	186367	7.8283e+06	-3392.51	3312.66	186367	7.8283e+06	-3392.51	3312.66	3312.66	0	0	0	0	0
	12625	186420	7.82842e+06	-3390.99	3310.27	186425	7.82841e+06	-3393.89	3314.82	3312.55	4.55773	5.43526	39.9815	0.697808	7.09331
	12750	186432	7.82854e+06	-3387.36	3304.57	186440	7.82854e+06	-3391.53	3311.12	3307.84	6.54796	7.78579	40.0643	0.699254	10.1732
	12875	186447	7.82866e+06	-3387.31	3304.49	186453	7.82866e+06	-3390.49	3309.48	3306.99	4.99261	5.87933	40.3373	0.704018	7.71315
	13000	186466	7.82879e+06	-3385.68	3301.93	186469	7.82879e+06	-3388.07	3305.68	3303.81	3.75008	3.59089	46.2423	0.80708	5.19207
	13125	186535	7.8289e+06	-3383.52	3298.54	186543	7.8289e+06	-3387.72	3305.13	3301.84	6.58768	8.07853	39.1957	0.684094	10.424
	13250	186710	7829638	-3371.42	3279.61	186720	7.82964e+06	-3376.53	3287.6	3283.6	7.98765	10.0544	38.4652	0.671344	12.8411
	13375	186724	7.82976e+06	-3369.3	3276.3	186736	7.82976e+06	-3374.07	3283.75	3280.03	7.45116	12.8688	30.0712	0.524842	14.8703
	13500	186743	7.82989e+06	-3366.45	3271.85	186751	7.82988e+06	-3370.69	3278.47	3275.16	6.61719	8.21994	38.8346	0.677792	10.5525
	13625	186741	7.83001e+06	-3368.07	3274.38	186746	7.83001e+06	-3371.13	3279.16	3276.77	4.77706	5.10286	43.1113	0.752434	6.98996
	13750	186779	7.83013e+06	-3362.68	3265.98	186788	7.83013e+06	-3366.25	3271.54	3268.76	5.56481	8.24968	34.0016	0.593439	9.9511
	13875	186804	7.83026e+06	-3361.22	3263.7	186811	7.83026e+06	-3365.58	3270.5	3267.1	6.7941	6.79721	44.9869	0.78517	9.6105
	14000	186796	7.83038e+06	-3363.35	3267.02	186803	7.83038e+06	-3367.48	3273.46	3270.24	6.43952	7.61463	40.2205	0.701979	9.97246
	14125	186861	7.8305e+06	-3361.97	3264.87	186871	7.8305e+06	-3368.32	3274.77	3269.82	9.90017	9.7927	45.3127	0.790855	13.9252
	14250	186982	7.83061e+06	-3359.67	3261.29	186989	7.83061e+06	-3363	3266.48	3263.88	5.18591	7.48313	34.7225	0.606021	9.10445
	14375	186915	7.83075e+06	-3358.2	3259	186921	7830745	-3361.32	3263.86	3261.43	4.85661	6.42515	37.0848	0.647251	8.05414
	14500	186939	7.83087e+06	-3356.56	3256.45	186947	7.83087e+06	-3362.01	3264.93	3260.69	8.48232	8.17898	46.043	0.803602	11.7833
	14625	186927	7.831e+06	-3357.2	3257.45	186935	7.831e+06	-3361.23	3263.72	3260.58	6.27211	7.61463	39.478	0.689022	9.86519
	14750	186964	7.83112e+06	-3362.37	3265.49	186978	7.83112e+06	-3371.38	3279.55	3272.52	14.0545	14.5843	43.9402	0.766901	20.2541
	14875	186975	7.83124e+06	-3368.21	3274.6	186988	7.83124e+06	-3375.17	3285.47	3280.04	10.8722	13.1516	39.5797	0.690797	17.0637
	15000	187033	7.83136e+06	-3367.9	3274.12	187039	7.83136e+06	-3372.79	3281.75	3277.93	7.6356	6.96966	47.6106	0.830962	10.3382
	15125	187111	7.83148e+06	-3364.97	3269.55	187119	7.83148e+06	-3370.17	3277.66	3273.6	8.11303	8.23977	44.5559	0.777648	11.5635
	15250	187111	7.8316e+06	-3361.42	3264.01	187118	7.8316e+06	-3364.46	3268.75	3266.38	4.73653	7.64438	31.7827	0.554714	8.99284
	15375	187155	7.83172e+06	-3357.61	3258.08	187155	7.83172e+06	-3357.61	3258.08	3258.08	0	0	0	0	0
	15500	187165	7.83185e+06	-3351.71	3248.91	187176	7.83185e+06	-3357.89	3258.52	3253.72	9.60574	10.7714	41.7261	0.728257	14.4323
	15625	187187	7.83197e+06	-3345.82	3239.78	187200	7.83197e+06	-3353.31	3251.4	3245.59	11.6239	13.0809	41.6247	0.726488	17.4993
	15750	187186	7.8321e+06	-3344.38	3237.54	187199	7.8321e+06	-3350.71	3247.36	3242.45	9.81777	13.1305	36.7857	0.642032	16.3951
	15875	187198	7.83222e+06	-3336.61	3225.52	187210	7.83222e+06	-3341.75	3233.47	3229.49	7.95232	12.2126	33.0704	0.577187	14.5735
	16000	187264	7.83234e+06	-3336.37	3225.15	187271	7.83234e+06	-3338.96	3229.15	3227.15	4.0053	7.07011	29.5321	0.515432	8.12582
	16125	187272	7.83246e+06	-3332.29	3218.84	187282	7.83246e+06	-3337.82	3227.39	3223.12	8.54522	10.0954	40.2463	0.70243	13.2264
	16250	187218	7.8326e+06	-3331.53	3217.67	187223	7.8326e+06	-3335.05	3223.11	3220.39	5.43642	5.59651	44.1687	0.770889	7.80228
	16375	187444	7.83307e+06	-3313.4	3189.76	187450	7.83307e+06	-3317.28	3195.72	3192.74	5.96039	6.30227	43.403	0.757526	8.67438
	16500	187450	7.8332e+06	-3310.83	3185.82	187464	7.8332e+06	-3318.95	3198.29	3192.05	12.4721	13.8759	41.9502	0.732169	18.6573
	16625	187460	7.83332e+06	-3303.88	3175.16	187465	7.83332e+06	-3310.87	3185.88	3180.52	10.7123	5.12269	64.4426	1.12474	11.8742
	16750	187580	7.83368e+06	-3298.37	3166.74	187580	7.83368e+06	-3298.37	3166.74	3166.74	0	0	0	0	0
	16875	187538	7.83382e+06	-3297.12	3164.83	187545	7.83382e+06	-3300.41	3169.85	3167.34	5.02897	6.40401	38.142	0.665704	8.1426
	17000	187537	7.83394e+06	-3297.87	3165.97	187543	7.83394e+06	-3301.58	3171.64	3168.81	5.67261	6.78729	39.8878	0.696174	8.84567
	17125	187501	7.83407e+06	-3297.87	3165.97	187506	7.83407e+06	-3301.75	3171.9	3168.94	5.93269	5.8595	45.3556	0.791605	8.3385
	17250	187540	7.83419e+06	-3291.46	3156.19	187549	7.83419e+06	-3296.75	3164.26	3160.22	8.07477	9.11799	41.5277	0.724795	12.1795
	17375	187559	7.83432e+06	-3284.67	3145.84	187574	7.83432e+06	-3294.1	3160.21	3153.03	14.3737	15.1982	43.4029	0.757523	20.9186
	17500	187646	7.83443e+06	-3288.16	3151.16	187646	7.83443e+06	-3288.16	3151.16	3151.16	0	0	0	0	0
*Along-strike distance of EF1 with 0 m corresponding to the southern-most limit of Chandon 3D survey
†X and Y data based on Co-ordinate Reference System WGS_1984_UTM_Zone_50S

## Sheet: EF2 fault displacement data
Table S3: EF2 fault displacement data
Horizon	Distance*	Footwall				Hanging wall				Footwall and Hanging wall mid-point depth	Fault throw	Fault heave	Fault dip	Fault dip	Fault displacement
		X†	Y†	Cut-off depth	Cut-off depth	X	Y	Cut-off depth	Cut-off depth
				[TWT]				[TWT]
	(m)			(ms)	(m)			(ms)	(m)	(m)	(m)	(m)	(°)	(radians)	(m)
HK	2875	185212	7.81874e+06	-2981.41	2705.39	185212	7.81874e+06	-2981.41	2705.39	2705.39	0	0	0	0	0
	3000	185219	7.81887e+06	-2991.7	2719.65	185214	7.81887e+06	-2992.82	2721.2	2720.42	1.55416	4.75063	18.1155	0.316174	4.99839
	3125	185249	7.81899e+06	-2988.98	2715.87	185240	7.81899e+06	-2995.02	2724.26	2720.06	8.38066	8.60321	44.2493	0.772295	12.0104
	3250	185282	7.81911e+06	-2988.98	2715.87	185276	7.81911e+06	-2992.89	2721.3	2718.59	5.42332	6.23286	41.0271	0.716058	8.26201
	3375	185319	7.81923e+06	-2985.43	2710.96	185315	7.81923e+06	-2991.27	2719.05	2715	8.09336	3.18779	68.5016	1.19558	8.69853
	3500	185338	7.81935e+06	-2986.8	2712.85	185330	7.81935e+06	-2993.56	2722.23	2717.54	9.37403	7.92591	49.7849	0.86891	12.2757
	3625	185395	7.81947e+06	-2986.76	2712.8	185387	7.81947e+06	-2992.81	2721.19	2716.99	8.38838	8.00782	46.3296	0.808604	11.597
	3750	185426	7.81959e+06	-2989	2715.9	185426	7.81959e+06	-2992.73	2721.08	2718.49	5.17353	0.393192	85.6538	1.49494	5.18845
	3875	185432	7.81972e+06	-2989.75	2716.94	185433	7.81972e+06	-2992	2720.06	2718.5	3.12077	0.595399	79.1986	1.38228	3.17706
	4000	185438	7.81984e+06	-2993.25	2721.8	185439	7.81984e+06	-2994.97	2724.19	2722.99	2.38821	0.715681	73.318	1.27964	2.49314
	4125	185478	7.81997e+06	-2993.09	2721.58	185477	7.81997e+06	-2996.25	2725.96	2723.77	4.38846	0.68593	81.1164	1.41575	4.44175
	4250	185523	7.82009e+06	-2995.73	2725.24	185520	7.82009e+06	-2998.51	2729.11	2727.17	3.86387	3.36886	48.9152	0.853732	5.12627
	4375	185569	7.82021e+06	-3000.14	2731.37	185559	7.82021e+06	-3002.33	2734.42	2732.9	3.04798	9.91428	17.0892	0.298262	10.3722
	4500	185601	7.82033e+06	-3001	2732.57	185598	7.82033e+06	-3003.64	2736.24	2734.41	3.6756	2.98558	50.914	0.888618	4.73537
	4625	185589	7.82046e+06	-3002.42	2734.55	185584	7.82046e+06	-3005.01	2738.15	2736.35	3.60764	4.68984	37.5692	0.655706	5.9169
	4750	185642	7.82057e+06	-3000.64	2732.07	185638	7.82058e+06	-3005.5	2738.84	2735.45	6.76812	3.9332	59.8375	1.04436	7.82799
	4875	185713	7.82069e+06	-2997.45	2727.63	185701	7.82069e+06	-3005.28	2738.53	2733.08	10.898	11.8902	42.5072	0.74189	16.129
	5000	185717	7.82082e+06	-2992.45	2720.69	185712	7.82082e+06	-2996.81	2726.74	2723.71	6.05489	4.77046	51.7665	0.903496	7.70837
	5125	185689	7.82095e+06	-2991.75	2719.72	185689	7.82095e+06	-2991.75	2719.72	2719.72	0	0	0	0	0
	5250	185774	7.82106e+06	-2991.75	2719.72	185774	7.82106e+06	-2991.75	2719.72	2719.72	0	0	0	0	0
	5375	185764	7.82119e+06	-2990.32	2717.73	185758	7.82119e+06	-2994.44	2723.45	2720.59	5.71733	5.89054	44.1451	0.770477	8.20892
	5500	185789	7.82131e+06	-2989.26	2716.26	185781	7.82131e+06	-2994.75	2723.88	2720.07	7.61754	8.00782	43.5692	0.760426	11.0522
	5625	185808	7.82144e+06	-2995.5	2724.92	185795	7.82144e+06	-3003.21	2735.65	2730.28	10.7239	12.5662	40.4773	0.706462	16.52
	5750	185831	7.82156e+06	-2998.1	2728.54	185816	7.82156e+06	-3006.69	2740.49	2734.51	11.9599	14.7951	38.951	0.679823	19.0246
	5875	185815	7.82169e+06	-3004.55	2737.51	185805	7.82169e+06	-3009.41	2744.29	2740.9	6.77685	9.49996	35.5024	0.619633	11.6694
	6000	185868	7.82181e+06	-3002.66	2734.88	185857	7.82181e+06	-3006.63	2740.41	2737.65	5.53156	10.6498	27.4476	0.479051	12.0007
	6125	185801	7.82194e+06	-3001.75	2733.61	185798	7.82194e+06	-3003.82	2736.5	2735.05	2.88244	3.17657	42.2208	0.736893	4.28942
	6250	185814	7.82207e+06	-3000.95	2732.5	185808	7.82207e+06	-3005.23	2738.46	2735.48	5.96044	5.84958	45.5378	0.794785	8.35131
	6375	185809	7.82219e+06	-2995.67	2725.16	185797	7.82219e+06	-2999.62	2730.65	2727.9	5.49098	11.4163	25.6864	0.448313	12.6682
	6500	185827	7.82232e+06	-2991.39	2719.22	185822	7.82232e+06	-2996.26	2725.98	2722.6	6.76134	4.64888	55.4888	0.968463	8.20536
	6625	185791	7.82245e+06	-2987	2713.13	185783	7.82245e+06	-2991.28	2719.06	2716.1	5.93299	8.93561	33.583	0.586134	10.7259
	6750	185830	7.82257e+06	-2982.95	2707.52	185825	7.82257e+06	-2987.33	2713.59	2710.56	6.06355	5.17357	49.5284	0.864434	7.97073
	6875	185829	7.82269e+06	-2978.58	2701.48	185819	7.82269e+06	-2983.99	2708.96	2705.22	7.47987	10.4985	35.4688	0.619048	12.8905
	7000	185905	7.82281e+06	-2979.86	2703.25	185905	7.82281e+06	-2979.86	2703.25	2703.25	0	0	0	0	0
	7125	185881	7.82294e+06	-2970	2689.65	185878	7.82294e+06	-2972.46	2693.04	2691.34	3.38983	3.38869	45.0096	0.785566	4.79313
	7250	185920	7.82306e+06	-2974.25	2695.51	185920	7.82306e+06	-2974.25	2695.51	2695.51	0	0	0	0	0
	7375	185959	7.82318e+06	-2973.25	2694.13	185959	7.82318e+06	-2973.25	2694.13	2694.13	0	0	0	0	0
	7500	186031	7.8233e+06	-2971.75	2692.06	186031	7.8233e+06	-2971.75	2692.06	2692.06	0	0	0	0	0
	7625	186103	7.82341e+06	-2972.25	2692.75	186103	7.82341e+06	-2972.25	2692.75	2692.75	0	0	0	0	0
	7750	186142	7.82353e+06	-2971.5	2691.71	186142	7.82353e+06	-2971.5	2691.71	2691.71	0	0	0	0	0
	7875	186187	7.82366e+06	-2966.9	2685.38	186183	7.82366e+06	-2968.75	2687.93	2686.65	2.54636	4.0647	32.0654	0.559647	4.79643
	8000	186219	7.82378e+06	-2963.5	2680.7	186221	7.82378e+06	-2965.6	2683.59	2682.15	2.8873	1.91638	56.4268	0.984833	3.4654
	8125	186258	7.8239e+06	-2962	2678.64	186256	7.8239e+06	-2967.13	2685.7	2682.17	7.05331	1.98708	74.2662	1.29619	7.32787
	8250	186297	7.82402e+06	-2955.5	2669.72	186289	7.82402e+06	-2967.14	2685.71	2677.72	15.9866	8.71358	61.4072	1.07176	18.2071
	8375	186319	7.82414e+06	-2956.49	2671.08	186310	7.82414e+06	-2963.2	2680.29	2675.69	9.21111	8.51138	47.261	0.82486	12.5415
	8500	186355	7.82426e+06	-2951.87	2664.75	186343	7.82427e+06	-2959.32	2674.96	2669.86	10.2124	11.9212	40.5853	0.708346	15.6974
	8625	186387	7.82439e+06	-2949.03	2660.86	186379	7.82439e+06	-2957.05	2671.85	2666.36	10.9843	7.58359	55.3787	0.966541	13.3479
	8750	186453	7.8245e+06	-2950.5	2662.88	186442	7.8245e+06	-2958.06	2673.23	2668.06	10.3586	10.811	43.7757	0.76403	14.9726
	8875	186443	7.82463e+06	-2952.58	2665.72	186441	7.82463e+06	-2956.81	2671.52	2668.62	5.79669	2.22895	68.9672	1.20371	6.21046
	9000	186498	7.82475e+06	-2951.5	2664.24	186497	7.82475e+06	-2955.11	2669.19	2666.72	4.94475	0.807527	80.7249	1.40892	5.01025
	9125	186520	7.82487e+06	-2952.04	2664.98	186520	7.82487e+06	-2952.04	2664.98	2664.98	0	0	0	0	0
	9250	186529	7.825e+06	-2942.78	2652.33	186529	7.825e+06	-2942.78	2652.33	2652.33	0	0	0	0	0
	9375	186595	7.82511e+06	-2935.61	2642.55	186591	7.82512e+06	-2938.81	2646.91	2644.73	4.35948	3.87372	48.3765	0.84433	5.83187
	9500	186620	7.82524e+06	-2935.75	2642.74	186620	7.82524e+06	-2935.75	2642.74	2642.74	0	0	0	0	0
	9625	186649	7.82536e+06	-2933.86	2640.17	186645	7.82536e+06	-2936.62	2643.93	2642.05	3.75755	4.05479	42.8211	0.747369	5.52815
	9750	186807	7.82547e+06	-2928.26	2632.56	186797	7.82547e+06	-2935.75	2642.74	2637.65	10.186	10.0035	45.5178	0.794435	14.2767
	9875	186812	7.82559e+06	-2931.4	2636.82	186812	7.82559e+06	-2931.4	2636.82	2636.82	0	0	0	0	0
	10000	186842	7.82571e+06	-2929.75	2634.58	186842	7.82571e+06	-2929.75	2634.58	2634.58	0	0	0	0	0
	10125	186865	7.82584e+06	-2927.52	2631.55	186865	7.82584e+06	-2927.52	2631.55	2631.55	0	0	0	0	0
	10250	186874	7.82596e+06	-2922.24	2624.39	186864	7.82596e+06	-2930.4	2635.46	2629.93	11.0758	10.5295	46.4485	0.810679	15.2822
	10375	186892	7.82608e+06	-2917.75	2618.31	186885	7.82609e+06	-2927.78	2631.9	2625.1	13.5976	7.00932	62.7297	1.09484	15.2979
	10500	186964	7.8262e+06	-2919.5	2620.68	186952	7.8262e+06	-2929.09	2633.68	2627.18	13.0079	12.2734	46.664	0.814441	17.8841
	10625	186957	7.82633e+06	-2924.7	2627.72	186950	7.82633e+06	-2929.28	2633.94	2630.83	6.21798	6.71789	42.7869	0.746773	9.15387
	10750	186986	7.82645e+06	-2923.97	2626.73	186982	7.82645e+06	-2927.88	2632.04	2629.39	5.30645	4.5993	49.0833	0.856665	7.02225
	10875	186972	7.82658e+06	-2924.33	2627.22	186966	7.82658e+06	-2928.35	2632.68	2629.95	5.4565	6.65709	39.3398	0.68661	8.60757
	11000	186945	7.82671e+06	-2922.55	2624.81	186941	7.82671e+06	-2925.3	2628.54	2626.67	3.72963	3.42835	47.4101	0.827463	5.06594
	11125	186969	7.82683e+06	-2925.11	2628.28	186962	7.82683e+06	-2929.39	2634.09	2631.19	5.8112	7.11108	39.2558	0.685144	9.18354
	11250	187062	7.82694e+06	-2924.86	2627.94	187057	7.82695e+06	-2927.36	2631.33	2629.64	3.39308	4.85108	34.9708	0.610356	5.91997
	11375	187104	7.82707e+06	-2924.25	2627.11	187105	7.82706e+06	-2925.59	2628.93	2628.02	1.81796	1.00841	60.9831	1.06436	2.07891
	11500	187123	7.82719e+06	-2925.84	2629.27	187119	7.82719e+06	-2926.94	2630.76	2630.02	1.4931	4.07462	20.1248	0.351244	4.33957
	11625	187161	7.82731e+06	-2922.59	2624.86	187154	7.82731e+06	-2925.93	2629.39	2627.13	4.53032	6.37427	35.4022	0.617884	7.82017
	11750	187071	7.82745e+06	-2922.98	2625.39	187069	7.82745e+06	-2926.08	2629.6	2627.49	4.20517	1.48223	70.5836	1.23192	4.45875
	11875	187156	7.82756e+06	-2920.82	2622.46	187150	7.82756e+06	-2925.13	2628.31	2625.38	5.84347	5.68834	45.7707	0.798849	8.15495
	12000	187107	7.82769e+06	-2920.02	2621.38	187095	7.8277e+06	-2929.49	2634.23	2627.8	12.8471	12.3553	46.1178	0.804908	17.8242
	12125	187153	7.82782e+06	-2922.93	2625.32	187145	7.82782e+06	-2929.43	2634.14	2629.73	8.82223	8.4618	46.1946	0.806248	12.2243
	12250	187178	7.82794e+06	-2926.31	2629.91	187178	7.82794e+06	-2926.31	2629.91	2629.91	0	0	0	0	0
	12375	188210	7.83297e+06	-2890.75	2581.93	188210	7.83297e+06	-2890.75	2581.93	2581.93	0	0	0	0	0
	12500	188216	7.8331e+06	-2890	2580.93	188215	7.8331e+06	-2890.59	2581.72	2581.32	0.791053	0.544518	55.4586	0.967935	0.960346
	12625	188196	7.83323e+06	-2885.94	2575.49	188195	7.83323e+06	-2890.38	2581.44	2578.46	5.94865	0.786384	82.4694	1.43936	6.0004
	12750	188298	7.83334e+06	-2885.94	2575.49	188294	7.83334e+06	-2889	2579.59	2577.54	4.09877	3.95304	46.0369	0.803496	5.69442
	12875	188290	7.83347e+06	-2888.07	2578.34	188274	7.83347e+06	-2895.12	2587.8	2583.07	9.45663	15.3297	31.6697	0.55274	18.0119
	13000	188260	7.8336e+06	-2886.65	2576.44	188251	7.8336e+06	-2895.05	2587.7	2582.07	11.2646	9.0559	51.2033	0.893666	14.4534
	13125	188347	7.83371e+06	-2890.56	2581.68	188337	7.83371e+06	-2895.33	2588.08	2584.88	6.40127	9.76166	33.2551	0.580411	11.6733
	13250	188288	7.83384e+06	-2890.2	2581.19	188284	7.83384e+06	-2892.5	2584.28	2582.74	3.08488	4.45789	34.6834	0.60534	5.42119
	13375	188268	7.83397e+06	-2897.27	2590.69	188268	7.83397e+06	-2897.27	2590.69	2590.69	0	0	0	0	0
HJ	2750	185169	7.81862e+06	-2994.77	2723.91	185169	7.81862e+06	-2994.77	2723.91	2723.91	0	0	0	0	0
	2875	185197	7.81874e+06	-2993.28	2721.84	185200	7.81874e+06	-2994.99	2724.21	2723.03	2.37435	3.83146	31.7864	0.554778	4.50751
	3000	185207	7.81887e+06	-2998.83	2729.55	185204	7.81887e+06	-3000.94	2732.49	2731.02	2.93533	2.92479	45.1031	0.787197	4.14374
	3125	185236	7.81899e+06	-2998.95	2729.72	185232	7.81899e+06	-3004.25	2737.09	2733.41	7.37729	3.72109	63.2337	1.10364	8.26262
	3250	185270	7.81911e+06	-2998.26	2728.76	185266	7.81911e+06	-3001.78	2733.65	2731.21	4.89707	4.82996	45.3953	0.792298	6.87821
	3375	185311	7.81923e+06	-2995.93	2725.52	185305	7.81923e+06	-3001.14	2732.76	2729.14	7.24467	6.12119	49.8047	0.869257	9.48442
	3500	185326	7.81936e+06	-2996.51	2726.32	185317	7.81936e+06	-3004.76	2737.8	2732.06	11.4798	9.68233	49.855	0.870135	15.0178
	3625	185381	7.81947e+06	-2997.54	2727.76	185377	7.81947e+06	-3001.35	2733.06	2730.41	5.29952	4.54843	49.3614	0.86152	6.98377
	3750	185422	7.81959e+06	-2998.5	2729.09	185416	7.8196e+06	-3003.33	2735.81	2732.45	6.72155	6.08153	47.8618	0.835346	9.06445
	3875	185423	7.81972e+06	-3000.09	2731.3	185420	7.81972e+06	-3002.18	2734.21	2732.76	2.90871	2.62214	47.966	0.837165	3.91614
	4000	185431	7.81985e+06	-3001.58	2733.38	185426	7.81985e+06	-3005.73	2739.16	2736.27	5.78047	4.85108	49.996	0.872595	7.54632
	4125	185468	7.81997e+06	-3001.28	2732.96	185461	7.81997e+06	-3007.34	2741.4	2737.18	8.44271	7.1309	49.8148	0.869432	11.0512
	4250	185512	7.82009e+06	-3005.23	2738.46	185506	7.82009e+06	-3010.16	2745.34	2741.9	6.87608	6.00091	48.8881	0.853258	9.12641
	4375	185550	7.82021e+06	-3008.61	2743.17	185545	7.82021e+06	-3012.8	2749.02	2746.1	5.84977	5.60642	46.2169	0.806636	8.10258
	4500	185589	7.82033e+06	-3011.38	2747.04	185583	7.82033e+06	-3016.07	2753.59	2750.32	6.55435	6.27382	46.2527	0.807263	9.07305
	4625	185576	7.82046e+06	-3011.93	2747.81	185568	7.82046e+06	-3018.43	2756.9	2752.35	9.0882	8.28935	47.632	0.831336	12.3008
	4750	185628	7.82058e+06	-3010.19	2745.38	185621	7.82058e+06	-3015.14	2752.29	2748.84	6.91529	7.07874	44.3308	0.773719	9.89594
	4875	185700	7.82069e+06	-3006.12	2739.7	185687	7.82069e+06	-3014.52	2751.43	2745.56	11.726	13.303	41.3947	0.722475	17.7332
	5000	185706	7.82082e+06	-3002.04	2734.02	185696	7.82082e+06	-3008.42	2742.91	2738.46	8.89123	9.88324	41.9754	0.732609	13.2941
	5125	185675	7.82095e+06	-3003.99	2736.73	185675	7.82095e+06	-3003.99	2736.73	2736.73	0	0	0	0	0
	5250	185758	7.82106e+06	-3001.3	2732.99	185754	7.82106e+06	-3003.41	2735.92	2734.46	2.93773	4.88213	31.0366	0.541691	5.69785
	5375	185742	7.82119e+06	-3003.71	2736.34	185737	7.82119e+06	-3006.99	2740.91	2738.63	4.57122	5.71939	38.6336	0.674283	7.32171
	5500	185764	7.82132e+06	-3005.18	2738.39	185755	7.82132e+06	-3010.2	2745.39	2741.89	7.0016	8.71358	38.7828	0.676888	11.1781
	5625	185791	7.82144e+06	-3005.79	2739.24	185775	7.82144e+06	-3015.94	2753.41	2746.33	14.1714	16.5489	40.5746	0.70816	21.7875
	5750	185818	7.82156e+06	-3005.98	2739.51	185796	7.82156e+06	-3018.64	2757.19	2748.35	17.6843	21.8044	39.0435	0.681438	28.0743
	5875	185795	7.82169e+06	-3014.92	2751.99	185789	7.82169e+06	-3018.4	2756.85	2754.42	4.86805	6.86791	35.3294	0.616615	8.4182
	6000	185846	7.82181e+06	-3012.69	2748.87	185839	7.82181e+06	-3016.96	2754.84	2751.85	5.96955	6.78729	41.3322	0.721384	9.03896
	6125	185784	7.82194e+06	-3012.07	2748	185781	7.82194e+06	-3013.88	2750.53	2749.27	2.52888	3.16665	38.6107	0.673884	4.05252
	6250	185801	7.82207e+06	-3010.2	2745.39	185794	7.82207e+06	-3015.89	2753.34	2749.37	7.95008	7.77458	45.6394	0.796559	11.1197
	6375	185790	7.82219e+06	-3005.47	2738.79	185787	7.82219e+06	-3009.09	2743.84	2741.32	5.04828	3.69134	53.8254	0.939431	6.25389
	6500	185814	7.82232e+06	-3003.14	2735.55	185807	7822318	-3008.25	2742.67	2739.11	7.12244	6.37297	48.1786	0.840876	9.5574
	6625	185777	7.82245e+06	-2997.5	2727.7	185772	7.82245e+06	-3003.66	2736.27	2731.99	8.57147	5.48614	57.3789	1.00145	10.1768
	6750	185821	7.82257e+06	-2991.04	2718.73	185811	7.82257e+06	-2999.6	2730.62	2724.68	11.8903	10.1053	49.6396	0.866375	15.6043
	6875	185813	7.8227e+06	-2988.87	2715.72	185801	7.8227e+06	-2998.53	2729.13	2722.43	13.4111	12.3441	47.3722	0.8268	18.2273
	7000	185894	7.82281e+06	-2989.51	2716.61	185889	7.82281e+06	-2993.06	2721.53	2719.07	4.92455	4.54843	47.2737	0.825082	6.70369
	7125	185863	7.82294e+06	-2983.81	2708.71	185863	7.82294e+06	-2983.81	2708.71	2708.71	0	0	0	0	0
	7250	185908	7.82306e+06	-2984.17	2709.21	185908	7.82306e+06	-2984.17	2709.21	2709.21	0	0	0	0	0
	7375	185955	7.82318e+06	-2982.93	2707.5	185955	7.82318e+06	-2982.93	2707.5	2707.5	0	0	0	0	0
	7500	186015	7.8233e+06	-2981.64	2705.71	186013	7.8233e+06	-2982.74	2707.23	2706.47	1.52132	1.91638	38.4444	0.670981	2.44682
	7625	186088	7.82342e+06	-2982.33	2706.67	186088	7.82342e+06	-2982.33	2706.67	2706.67	0	0	0	0	0
	7750	186132	7.82354e+06	-2981.53	2705.56	186132	7.82354e+06	-2981.53	2705.56	2705.56	0	0	0	0	0
	7875	186169	7.82366e+06	-2979.53	2702.8	186165	7.82366e+06	-2980.8	2704.55	2703.67	1.75525	3.63055	25.8022	0.450333	4.03259
	8000	186209	7.82378e+06	-2975.88	2697.76	186207	7.82378e+06	-2978.16	2700.9	2699.33	3.14786	2.29965	53.8502	0.939863	3.89839
	8125	186251	7.8239e+06	-2971.73	2692.03	186246	7.8239e+06	-2976.11	2698.07	2695.05	6.04096	5.29385	48.771	0.851215	8.03232
	8250	186289	7.82402e+06	-2967.14	2685.71	186276	7.82402e+06	-2977.9	2700.54	2693.13	14.8334	12.9494	48.8793	0.853105	19.6906
	8375	186306	7.82414e+06	-2966.45	2684.76	186303	7.82414e+06	-2973.25	2694.13	2689.44	9.36594	3.45939	69.7278	1.21698	9.98439
	8500	186338	7.82427e+06	-2963.23	2680.33	186329	7.82427e+06	-2968.43	2687.49	2683.91	7.15257	8.24968	40.9257	0.714288	10.9186
	8625	186376	7.82439e+06	-2959.17	2674.76	186365	7.82439e+06	-2967.8	2686.62	2680.69	11.8612	10.6002	48.2133	0.84148	15.9076
	8750	186439	7.8245e+06	-2960.02	2675.92	186425	7.82451e+06	-2969.87	2689.47	2682.7	13.5446	14.6028	42.847	0.747821	19.9173
	8875	186439	7.82463e+06	-2958.38	2673.67	186426	7.82463e+06	-2967.25	2685.86	2679.77	12.1883	13.5435	41.9853	0.732781	18.2204
	9000	186488	7.82475e+06	-2961.2	2677.54	186479	7.82475e+06	-2967.38	2686.04	2681.79	8.49618	8.89466	43.6874	0.762489	12.3004
	9125	186507	7.82487e+06	-2963.66	2680.92	186507	7.82487e+06	-2963.66	2680.92	2680.92	0	0	0	0	0
	9250	186520	7.825e+06	-2955.07	2669.13	186520	7.825e+06	-2955.07	2669.13	2669.13	0	0	0	0	0
	9375	186586	7.82512e+06	-2945.89	2656.57	186579	7.82512e+06	-2950.34	2662.66	2659.61	6.08471	7.06882	40.7213	0.71072	9.32694
	9500	186599	7.82524e+06	-2945.83	2656.49	186599	7.82524e+06	-2945.83	2656.49	2656.49	0	0	0	0	0
	9625	186636	7.82536e+06	-2944.57	2654.77	186631	7.82536e+06	-2947.75	2659.11	2656.94	4.34532	4.82134	42.0273	0.733515	6.49054
	9750	186794	7.82547e+06	-2937.43	2645.03	186782	7.82547e+06	-2945.69	2656.3	2650.66	11.2694	12.7274	41.5231	0.724715	16.9996
	9875	186801	7.82559e+06	-2941.66	2650.8	186801	7.82559e+06	-2941.66	2650.8	2650.8	0	0	0	0	0
	10000	186832	7.82571e+06	-2938.73	2646.8	186828	7.82571e+06	-2940.81	2649.64	2648.22	2.83611	3.6603	37.7696	0.659204	4.63048
	10125	186850	7.82584e+06	-2934.31	2640.78	186842	7.82584e+06	-2937.77	2645.49	2643.14	4.71182	8.18889	29.9158	0.522129	9.44771
	10250	186853	7.82596e+06	-2932.25	2637.98	186843	7.82596e+06	-2940.5	2649.21	2643.6	11.2361	10.398	47.2185	0.824119	15.3091
	10375	186884	7.82609e+06	-2928.88	2633.4	186860	7.82609e+06	-2943.43	2653.21	2643.31	19.8149	23.3772	40.2852	0.70311	30.6452
	10500	186950	7.8262e+06	-2930.72	2635.9	186930	7.82621e+06	-2943.2	2652.9	2644.4	17.0005	19.7975	40.6534	0.709535	26.0952
	10625	186944	7.82633e+06	-2933.32	2639.43	186934	7.82633e+06	-2940.56	2649.3	2644.37	9.86242	10.63	42.855	0.747961	14.5005
	10750	186972	7826452	-2934.48	2641.01	186966	7.82645e+06	-2938.73	2646.8	2643.91	5.78875	6.23286	42.8843	0.748473	8.50636
	10875	186953	7.82658e+06	-2936.37	2643.59	186947	7.82658e+06	-2940.17	2648.76	2646.18	5.17873	6.23156	39.7282	0.693388	8.10257
	11000	186928	7.82671e+06	-2933.87	2640.18	186925	7.82671e+06	-2935.85	2642.88	2641.53	2.69529	2.75363	44.3865	0.774691	3.85319
	11125	186950	7.82683e+06	-2937.16	2644.66	186947	7.82683e+06	-2939.97	2648.49	2646.58	3.82992	3.42835	48.1667	0.840667	5.14022
	11250	187044	7.82695e+06	-2936.09	2643.2	187039	7.82695e+06	-2939.22	2647.47	2645.34	4.26476	4.85108	41.3198	0.721167	6.45919
	11375	187095	7.82707e+06	-2933.5	2639.68	187081	7.82707e+06	-2941.32	2650.33	2645.01	10.6542	14.3114	36.6661	0.639943	17.8417
	11500	187105	7.82719e+06	-2934.81	2641.46	187092	7.82719e+06	-2942.07	2651.36	2646.41	9.89467	12.8688	37.5562	0.65548	16.233
	11625	187142	7.82731e+06	-2932.78	2638.7	187133	7.82731e+06	-2938.26	2646.16	2642.43	7.46135	9.70216	37.5617	0.655576	12.2394
	11750	187051	7.82745e+06	-2936.28	2643.46	187048	7.82745e+06	-2937.37	2644.95	2644.21	1.48475	2.82434	27.7309	0.483995	3.19083
	11875	187138	7.82756e+06	-2932.68	2638.56	187132	7.82757e+06	-2935.96	2643.03	2640.8	4.46411	5.59651	38.5779	0.673312	7.15885
	12000	187091	7.8277e+06	-2932.6	2638.45	187079	7.8277e+06	-2941.83	2651.03	2644.74	12.5744	12.0216	46.2874	0.807867	17.3964
	12125	187141	7.82782e+06	-2931.87	2637.46	187130	7.82782e+06	-2939.7	2648.12	2642.79	10.662	11.6992	42.3443	0.739048	15.8287
	12250	187168	7.82794e+06	-2933.35	2639.47	187168	7.82794e+06	-2933.35	2639.47	2639.47	0	0	0	0	0
	12375	187701	7.82989e+06	-2922	2624.06	187701	7.82989e+06	-2922	2624.06	2624.06	0	0	0	0	0
	12500	187677	7.83002e+06	-2917.06	2617.37	187669	7.83002e+06	-2922.54	2624.79	2621.08	7.42174	8.20011	42.1476	0.735614	11.06
	12625	187665	7.83014e+06	-2916.32	2616.37	187662	7.83014e+06	-2918.49	2619.31	2617.84	2.93651	3.11708	43.2915	0.755579	4.28244
	12750	187649	7.83027e+06	-2912.83	2611.65	187643	7.83027e+06	-2916.14	2616.13	2613.89	4.47475	6.48464	34.6078	0.60402	7.8787
	12875	187618	7.8304e+06	-2916.76	2616.97	187618	7.8304e+06	-2916.76	2616.97	2616.97	0	0	0	0	0
	13000	188195	7.83297e+06	-2904.27	2600.1	188195	7.83297e+06	-2904.27	2600.1	2600.1	0	0	0	0	0
	13125	188195	7.8331e+06	-2903.69	2599.32	188192	7.8331e+06	-2907.14	2603.97	2601.65	4.64963	2.54152	61.3387	1.07056	5.2989
	13250	188198	7.83323e+06	-2901.94	2596.97	188197	7.83323e+06	-2904.4	2600.28	2598.62	3.31285	1.41152	66.9223	1.16802	3.60102
	13375	188283	7.83334e+06	-2902.62	2597.88	188278	7.83334e+06	-2906.32	2602.87	2600.37	4.98495	4.21603	49.7771	0.868774	6.52876
	13500	188255	7.83347e+06	-2905.87	2602.26	188253	7.83347e+06	-2906.44	2603.03	2602.64	0.768394	1.94612	21.5457	0.376044	2.09233
	13625	188246	7.8336e+06	-2901.07	2595.8	188233	7.8336e+06	-2908.41	2605.69	2600.74	9.88998	12.8093	37.6714	0.657491	16.183
	13750	188331	7.83371e+06	-2901.03	2595.74	188323	7.83371e+06	-2907.7	2604.73	2600.23	8.98607	7.88624	48.7296	0.850491	11.9558
	13875	188267	7.83385e+06	-2903.25	2598.73	188264	7.83385e+06	-2906.13	2602.61	2600.67	3.88047	3.54001	47.6269	0.831247	5.2526
	14000	188254	7.83397e+06	-2908.12	2605.29	188251	7.83397e+06	-2909.18	2606.72	2606.01	1.43016	3.10587	24.7247	0.431527	3.41932
	14125	188163	7.83411e+06	-2914.5	2613.91	188163	7.83411e+06	-2914.5	2613.91	2613.91	0	0	0	0	0
HI	750	184872	7.81664e+06	-3004.26	2737.11	184852	7.81664e+06	-3026.47	2768.16	2752.64	31.0556	20.4524	56.6321	0.988417	37.1853
	875	184902	7.81676e+06	-3009.67	2744.65	184884	7.81677e+06	-3030.03	2773.16	2758.91	28.5107	18.7481	56.6718	0.98911	34.1227
	1000	184942	7.81688e+06	-3007.16	2741.15	184916	7.81689e+06	-3033.01	2777.35	2759.25	36.2014	26.0304	54.2822	0.947403	44.5883
	1125	184930	7.81701e+06	-3005.18	2738.39	184905	7817015	-3030	2773.12	2755.76	34.7304	24.5779	54.7139	0.954937	42.5473
	1250	184952	7.81713e+06	-3001.18	2732.82	184926	7.81714e+06	-3027.73	2769.93	2751.38	37.1129	26.1606	54.8203	0.956795	45.4065
	1375	184957	7.81726e+06	-3001.41	2733.14	184938	7.81726e+06	-3019.9	2758.95	2746.05	25.814	19.9588	52.2896	0.912626	32.6299
	1500	184924	7.81739e+06	-2992.28	2720.45	184886	7.8174e+06	-3028.31	2770.75	2745.6	50.2957	38.888	52.2892	0.912619	63.5762
	1625	184921	7.81752e+06	-2996.58	2726.42	184898	7.81752e+06	-3023.25	2763.65	2745.03	37.225	23.3772	57.8713	1.01004	43.9567
	1750	184927	7.81764e+06	-2996.27	2725.99	184907	7.81765e+06	-3022.74	2762.93	2744.46	36.9409	20.2317	61.2915	1.06974	42.1183
	1875	184952	7.81777e+06	-3005.67	2739.07	184937	7.81777e+06	-3025.64	2767	2753.04	27.9261	15.491	60.9823	1.06434	31.9349
	2000	184940	7.81789e+06	-3007.42	2741.51	184924	7.8179e+06	-3029.86	2772.92	2757.22	31.4109	16.7511	61.9294	1.08087	35.5984
	2125	184938	7.81802e+06	-3011.65	2747.42	184921	7.81802e+06	-3031.5	2775.23	2761.32	27.8123	17.4979	57.8243	1.00922	32.8588
	2250	184982	7.81814e+06	-3007.94	2742.24	184960	7.81814e+06	-3029.8	2772.84	2757.54	30.6014	21.9558	54.3415	0.948438	37.663
	2375	184965	7.81827e+06	-3017.75	2755.94	184952	7.81827e+06	-3027.44	2769.53	2762.73	13.5814	13.2323	45.7461	0.79842	18.9618
	2500	184941	7.8184e+06	-3018.93	2757.6	184929	7.8184e+06	-3030.82	2774.27	2765.93	16.6774	12.1419	53.9436	0.941494	20.6292
	2625	184989	7.81852e+06	-3024.29	2765.11	184984	7.81852e+06	-3028.27	2770.69	2767.9	5.58508	4.50877	51.0865	0.891627	7.17789
	2750	185132	7.81862e+06	-3027.86	2770.11	185127	7.81862e+06	-3033.05	2777.41	2773.76	7.29302	5.73792	51.8055	0.904176	9.27965
	2875	185151	7.81875e+06	-3029.41	2772.29	185141	7.81875e+06	-3036.35	2782.05	2777.17	9.75987	10.4575	43.0237	0.750905	14.3044
	3000	185160	7.81887e+06	-3036.21	2781.85	185153	7.81887e+06	-3041.8	2789.73	2785.79	7.87708	7.04899	48.1755	0.840821	10.5706
	3125	185194	7.81899e+06	-3036.14	2781.76	185189	7.81899e+06	-3040.66	2788.12	2784.94	6.36805	5.07312	51.4574	0.8981	8.14178
	3250	185231	7.81912e+06	-3034.96	2780.09	185228	7.81912e+06	-3038.44	2785	2782.55	4.90011	2.7946	60.3033	1.05249	5.641
	3375	185269	7.81924e+06	-3032.09	2776.06	185262	7.81924e+06	-3038.19	2784.64	2780.35	8.5849	7.14944	50.2127	0.876377	11.1721
	3500	185285	7.81936e+06	-3031.82	2775.68	185275	7.81936e+06	-3038.41	2784.95	2780.32	9.27443	10.0246	42.7738	0.746544	13.6568
	3625	185341	7.81948e+06	-3031.65	2775.44	185326	7.81948e+06	-3044.39	2793.39	2784.41	17.9466	15.2081	49.7218	0.867809	23.5238
	3750	185377	7.8196e+06	-3035.11	2780.31	185367	7.8196e+06	-3042.68	2790.97	2785.64	10.6668	9.52109	48.2482	0.842089	14.298
	3875	185379	7.81973e+06	-3035.01	2780.17	185369	7.81973e+06	-3043	2791.42	2785.79	11.259	10.0458	48.2593	0.842283	15.0892
	4000	185389	7.81985e+06	-3037.88	2784.21	185372	7.81985e+06	-3048.5	2799.19	2791.7	14.9855	17.3155	40.8741	0.713388	22.8996
	4125	185423	7.81997e+06	-3039.92	2787.08	185405	7.81998e+06	-3055.52	2809.13	2798.1	22.0451	18.345	50.2341	0.87675	28.6797
	4250	185465	7.82009e+06	-3044.34	2793.32	185451	7.8201e+06	-3055.78	2809.49	2801.4	16.1787	13.8971	49.3383	0.861115	21.3279
	4375	185500	7.82021e+06	-3046.38	2796.2	185486	7.82022e+06	-3056.92	2811.11	2803.65	14.9136	14.0993	46.6077	0.813458	20.5233
	4500	185539	7.82034e+06	-3052.24	2804.48	185524	7.82034e+06	-3060.12	2815.65	2810.06	11.1662	15.0978	36.4864	0.636808	18.7784
	4625	185527	7.82046e+06	-3051	2802.73	185517	7.82046e+06	-3058.82	2813.8	2808.27	11.0766	9.97378	47.9991	0.837742	14.9053
	4750	185575	7.82058e+06	-3047.49	2797.76	185569	7.82058e+06	-3052.09	2804.27	2801.02	6.50484	6.54543	44.8218	0.782288	9.22798
	4875	185638	7.8207e+06	-3045.47	2794.91	185632	7.8207e+06	-3049.72	2800.92	2797.91	6.00562	6.7265	41.7594	0.72884	9.01739
	5000	185637	7.82083e+06	-3044.51	2793.56	185626	7.82083e+06	-3051.73	2803.76	2798.66	10.2042	11.7798	40.9007	0.713852	15.5849
	5125	185614	7.82096e+06	-3044.29	2793.24	185608	7.82096e+06	-3046.33	2796.13	2794.69	2.88055	5.83967	26.2559	0.458252	6.51147
	5250	185682	7.82107e+06	-3042.92	2791.31	185675	7.82107e+06	-3046.55	2796.44	2793.87	5.12473	6.74633	37.2215	0.649637	8.47207
	5375	185673	7.8212e+06	-3043.91	2792.71	185663	7.8212e+06	-3049.59	2800.73	2796.72	8.02413	9.91428	38.985	0.680416	12.7546
	5500	185693	7.82132e+06	-3046.36	2796.17	185674	7.82133e+06	-3057.17	2811.46	2803.82	15.2962	18.8598	39.0437	0.681441	24.283
	5625	185716	7.82145e+06	-3052.41	2804.72	185702	7.82145e+06	-3060.06	2815.56	2810.14	10.8405	14.0074	37.7367	0.658629	17.7123
	5750	185726	7.82157e+06	-3059.67	2815.01	185718	7.82157e+06	-3064.75	2822.22	2818.62	7.21262	8.0587	41.8289	0.730051	10.815
	5875	185717	7.8217e+06	-3059.29	2814.47	185702	7.8217e+06	-3067.31	2825.86	2820.17	11.3909	14.3709	38.4016	0.670234	18.3378
	6000	185772	7.82182e+06	-3056.22	2810.12	185757	7.82182e+06	-3064.52	2821.89	2816.01	11.7774	14.5123	39.0609	0.681741	18.6899
	6125	185708	7.82195e+06	-3055.89	2809.65	185697	7.82195e+06	-3062.28	2818.71	2814.18	9.06338	11.1646	39.0697	0.681894	14.3803
	6250	185739	7.82207e+06	-3055.89	2809.65	185729	7.82208e+06	-3063.72	2820.76	2815.2	11.1084	10.6907	46.0977	0.804556	15.4172
	6375	185733	7.8222e+06	-3051.62	2803.6	185724	7.8222e+06	-3058.9	2813.92	2808.76	10.3129	9.08565	48.6201	0.84858	13.7443
	6500	185759	7.82232e+06	-3047.06	2797.16	185750	7.82233e+06	-3054.86	2808.19	2802.67	11.0341	9.74313	48.5556	0.847455	14.7201
	6625	185739	7.82245e+06	-3040.28	2787.59	185730	7.82245e+06	-3051.04	2802.78	2795.19	15.1952	9.57067	57.7954	1.00872	17.9581
	6750	185764	7.82258e+06	-3039.47	2786.45	185754	7.82258e+06	-3048.21	2798.78	2792.61	12.3353	10.3174	50.0905	0.874244	16.0813
	6875	185754	7.8227e+06	-3035.44	2780.77	185740	7.82271e+06	-3046.56	2796.45	2788.61	15.6798	14.2208	47.7935	0.834153	21.1681
	7000	185842	7.82282e+06	-3032.75	2776.99	185815	7.82282e+06	-3047.33	2797.54	2787.26	20.5522	26.8961	37.3846	0.652485	33.8495
	7125	185808	7.82295e+06	-3028.2	2770.59	185775	7.82295e+06	-3054.35	2807.47	2789.03	36.8762	32.9479	48.2201	0.8416	49.4512
	7250	185854	7.82307e+06	-3028.5	2771.01	185820	7.82307e+06	-3049.09	2800.03	2785.52	29.0122	34.3296	40.2013	0.701646	44.947
	7375	185892	7.82319e+06	-3029	2771.72	185868	7.82319e+06	-3046.86	2796.87	2784.29	25.1584	24.5581	45.6918	0.797472	35.1574
	7500	185956	7.82331e+06	-3026.23	2767.83	185926	7.82331e+06	-3048.67	2799.43	2783.63	31.605	30.1645	46.3359	0.808715	43.6895
	7625	186036	7.82342e+06	-3024.25	2765.05	185991	7.82343e+06	-3051.59	2803.56	2784.31	38.5122	45.8365	40.0372	0.698782	59.868
	7750	186075	7.82354e+06	-3024.25	2765.05	186022	7.82355e+06	-3055.12	2808.56	2786.8	43.5097	54.2078	38.7522	0.676353	69.5096
	7875	186107	7.82367e+06	-3019.8	2758.81	186058	7.82367e+06	-3052.47	2804.81	2781.81	45.9934	49.1446	43.1029	0.752288	67.3096
	8000	186158	7.82378e+06	-3018.62	2757.16	186121	7.82379e+06	-3052.55	2804.92	2781.04	47.7587	37.5769	51.8041	0.904151	60.7694
	8125	186192	7.82391e+06	-3017.75	2755.94	186168	7.82391e+06	-3040.45	2787.83	2771.89	31.8841	24.114	52.8997	0.923274	39.976
	8250	186231	7.82403e+06	-3019.5	2758.39	186200	7.82403e+06	-3040.98	2788.58	2773.48	30.1817	30.7896	44.4288	0.775428	43.1154
	8375	186237	7.82415e+06	-3015.5	2752.8	186212	7.82416e+06	-3042.1	2790.15	2771.48	37.3583	25.2229	55.9743	0.976936	45.0759
	8500	186276	7.82427e+06	-3012.75	2748.95	186234	7.82428e+06	-3043.37	2791.95	2770.45	42.9937	41.9344	45.7147	0.797871	60.0579
	8625	186314	7.82439e+06	-3007.41	2741.5	186275	7.8244e+06	-3035.19	2780.42	2760.96	38.9197	39.4127	44.6394	0.779105	55.3905
	8750	186369	7.82451e+06	-3007.49	2741.61	186336	7.82452e+06	-3030.39	2773.67	2757.64	32.058	33.9464	43.3612	0.756796	46.6912
	8875	186366	7.82464e+06	-3007.98	2742.29	186335	7.82464e+06	-3028.76	2771.38	2756.84	29.0847	30.7995	43.3598	0.756771	42.3619
	9000	186431	7.82476e+06	-3007.75	2741.97	186398	7.82476e+06	-3024.47	2765.36	2753.67	23.3848	33.9662	34.5463	0.602947	41.2377
	9125	186449	7.82488e+06	-3002.96	2735.3	186429	7.82488e+06	-3017.27	2755.27	2745.28	19.9747	20.6236	44.0843	0.769417	28.711
	9250	186461	7.82501e+06	-2998.89	2729.63	186443	7.82501e+06	-3012.58	2748.72	2739.17	19.0817	18.4865	45.9077	0.801241	26.568
	9375	186522	7.82512e+06	-2992.11	2720.22	186501	7.82513e+06	-3007.82	2742.07	2731.14	21.8556	21.3306	45.6964	0.797553	30.5395
	9500	186539	7.82525e+06	-2991.26	2719.04	186528	7.82525e+06	-2999.17	2730.02	2724.53	10.987	10.7416	45.6471	0.796692	15.3655
	9625	186577	7.82537e+06	-2989.83	2717.05	186569	7.82537e+06	-2996.48	2726.28	2721.67	9.23059	8.53251	47.2505	0.824677	12.5701
	9750	186716	7.82548e+06	-2985.48	2711.03	186704	7.82548e+06	-2992.7	2721.03	2716.03	10.0083	11.9609	39.921	0.696753	15.5958
	9875	186733	7.8256e+06	-2983.78	2708.67	186722	7.8256e+06	-2990.64	2718.18	2713.42	9.50333	11.3555	39.9256	0.696833	14.8075
	10000	186757	7.82572e+06	-2982.38	2706.74	186743	7.82573e+06	-2988.25	2714.86	2710.8	8.12674	14.4627	29.3321	0.511941	16.5896
	10125	186768	7.82585e+06	-2981.26	2705.19	186756	7.82585e+06	-2987.81	2714.25	2709.72	9.06582	11.6285	37.9408	0.662192	14.7448
	10250	186776	7.82597e+06	-2979.53	2702.8	186760	7.82598e+06	-2989.23	2716.22	2709.51	13.425	16.7003	38.7951	0.677103	21.4273
	10375	186802	7.8261e+06	-2979.82	2703.2	186792	7.8261e+06	-2986.48	2712.41	2707.8	9.21383	10.7106	40.7039	0.710418	14.1284
	10500	186865	7.82621e+06	-2981.75	2705.86	186849	7.82622e+06	-2990.45	2717.91	2711.89	12.0479	16.3183	36.4386	0.635974	20.2839
	10625	186872	7.82634e+06	-2983.11	2707.75	186860	7.82634e+06	-2991.26	2719.04	2713.39	11.2903	11.941	43.3955	0.757395	16.4335
	10750	186899	7.82646e+06	-2983.37	2708.11	186887	7.82646e+06	-2990.48	2717.95	2713.03	9.84873	11.5465	40.4628	0.706209	15.1763
	10875	186876	7.82659e+06	-2983.76	2708.64	186866	7.82659e+06	-2989.97	2717.25	2712.95	8.60188	10.1958	40.1533	0.700807	13.3397
	11000	186846	7.82672e+06	-2984.96	2710.31	186839	7.82672e+06	-2989.47	2716.55	2713.43	6.24782	7.22144	40.8656	0.713239	9.54906
	11125	186874	7.82684e+06	-2984.98	2710.33	186868	7.82684e+06	-2989	2715.9	2713.12	5.5686	6.44497	40.8277	0.712578	8.51745
	11250	186972	7.82696e+06	-2982.7	2707.18	186966	7.82696e+06	-2987.25	2713.48	2710.33	6.29855	6.15094	45.6793	0.797254	8.80374
	11375	187006	7.82708e+06	-2982.37	2706.72	186995	7.82708e+06	-2988.62	2715.38	2711.05	8.65335	11.4362	37.1135	0.647753	14.3411
	11500	187021	7.8272e+06	-2982.22	2706.51	187004	7.8272e+06	-2992.17	2720.3	2713.41	13.7839	17.6492	37.9896	0.663044	22.394
	11625	187054	7.82732e+06	-2982.73	2707.22	187042	7.82733e+06	-2989.24	2716.23	2711.73	9.0148	12.0415	36.8202	0.642634	15.0421
	11750	186969	7.82746e+06	-2980.58	2704.25	186954	7.82746e+06	-2988.84	2715.68	2709.96	11.4333	15.2888	36.79	0.642107	19.091
	11875	187056	7.82758e+06	-2980.9	2704.69	187047	7.82758e+06	-2986.13	2711.93	2708.31	7.23636	8.90587	39.0952	0.68234	11.4752
	12000	187031	7.8277e+06	-2982.49	2706.89	187017	7.82771e+06	-2987.22	2713.44	2710.16	6.54746	14.5929	24.1646	0.421751	15.9944
	12125	187069	7.82783e+06	-2980.57	2704.23	187061	7.82783e+06	-2985.87	2711.57	2707.9	7.3325	7.91728	42.8039	0.74707	10.7912
	12250	187103	7.82795e+06	-2979.68	2703	187096	7.82795e+06	-2984.46	2709.61	2706.31	6.61056	7.15073	42.7521	0.746165	9.7382
	12375	187022	7.82808e+06	-2977.81	2700.42	187017	7.82808e+06	-2982.03	2706.25	2703.34	5.83193	4.05349	55.1987	0.963399	7.10226
	12500	187055	7.82821e+06	-2978.41	2701.25	187052	7.82821e+06	-2982.66	2707.12	2704.19	5.87459	3.74222	57.5021	1.0036	6.96527
	12625	187125	7.82832e+06	-2975.86	2697.73	187115	7.82832e+06	-2983.82	2708.73	2703.23	11.0002	10.0854	47.4841	0.828755	14.9238
	12750	187211	7.82844e+06	-2975.7	2697.51	187202	7.82844e+06	-2983.08	2707.7	2702.61	10.1972	9.34864	47.4858	0.828783	13.834
	12875	187251	7.82856e+06	-2976.65	2698.82	187236	7.82856e+06	-2986.81	2712.87	2705.84	14.0493	15.3905	42.3916	0.739872	20.8387
	13000	187238	7.82869e+06	-2981.21	2705.12	187229	7.82869e+06	-2986.78	2712.83	2708.97	7.70803	8.75454	41.3626	0.721914	11.6643
	13125	187248	7.82881e+06	-2977.61	2700.14	187238	7.82881e+06	-2984.25	2709.32	2704.73	9.17938	10.6498	40.7591	0.71138	14.0598
	13250	187274	7.82893e+06	-2975.6	2697.37	187266	7.82893e+06	-2980.21	2703.74	2700.55	6.36663	8.04878	38.3442	0.669232	10.2624
	13375	187343	7.82905e+06	-2972.79	2693.49	187325	7.82905e+06	-2981.85	2706	2699.75	12.5098	18.1131	34.631	0.604425	22.0132
	13500	187488	7.82916e+06	-2970.83	2690.79	187471	7.82916e+06	-2979.62	2702.92	2696.86	12.1286	17.5983	34.5742	0.603433	21.373
	13625	187531	7.82928e+06	-2973.1	2693.92	187527	7.82928e+06	-2975.62	2697.4	2695.66	3.47613	3.96295	41.2558	0.72005	5.27148
	13750	187567	7.8294e+06	-2971.83	2692.17	187567	7.8294e+06	-2971.83	2692.17	2692.17	0	0	0	0	0
	13875	187609	7.82952e+06	-2968.52	2687.61	187602	7.82952e+06	-2971.24	2691.36	2689.48	3.74641	6.61613	29.5209	0.515237	7.60321
	14000	187629	7.82964e+06	-2966.76	2685.19	187619	7.82965e+06	-2970.54	2690.39	2687.79	5.20427	9.3896	28.9978	0.506108	10.7354
	14125	187634	7.82977e+06	-2964.36	2681.89	187625	7.82977e+06	-2969.15	2688.48	2685.18	6.59066	9.04598	36.0761	0.629646	11.1923
	14250	187637	7.82989e+06	-2963.58	2680.81	187627	7.8299e+06	-2967.64	2686.4	2683.61	5.5841	10.7515	27.4463	0.479029	12.1152
	14375	187605	7.83003e+06	-2960.52	2676.61	187595	7.83003e+06	-2966.26	2684.5	2680.56	7.8889	9.80392	38.8225	0.677581	12.5838
	14500	187608	7.83015e+06	-2958.62	2674	187602	7.83015e+06	-2963.08	2680.13	2677.07	6.1245	6.7265	42.3179	0.738588	9.09699
	14625	187586	7.83028e+06	-2960	2675.9	187580	7.83028e+06	-2963.74	2681.03	2678.47	5.13754	5.71809	41.9388	0.731971	7.68706
	14750	187566	7.83041e+06	-2957.64	2672.66	187559	7.83041e+06	-2963	2680.02	2676.34	7.35908	6.98949	46.4755	0.81115	10.1493
	14875	187615	7.83053e+06	-2956.47	2671.05	187609	7830529	-2960.97	2677.23	2674.14	6.17502	6.43376	43.8244	0.76488	8.91763
	15000	187621	7.83065e+06	-2956.22	2670.71	187615	7.83065e+06	-2960.09	2676.02	2673.37	5.30951	5.53701	43.7984	0.764427	7.67134
	15125	187643	7.83078e+06	-2953.99	2667.65	187642	7.83078e+06	-2957.25	2672.12	2669.89	4.46881	1.02825	77.0421	1.34464	4.58558
	15250	187721	7.83089e+06	-2952.17	2665.16	187714	7.83089e+06	-2955.25	2669.38	2667.27	4.21936	6.97828	31.1589	0.543826	8.15472
	15375	187833	7.831e+06	-2949.28	2661.21	187819	7.83101e+06	-2953.19	2666.56	2663.88	5.35195	13.7669	21.2439	0.370776	14.7706
	15500	187883	7.83112e+06	-2945.67	2656.27	187874	7.83112e+06	-2951.03	2663.6	2659.94	7.32958	9.07703	38.9204	0.679289	11.6668
	15625	187904	7.83125e+06	-2944.68	2654.92	187894	7.83125e+06	-2950.31	2662.62	2658.77	7.69658	9.77287	38.222	0.6671	12.4397
	15750	187787	7.83139e+06	-2949.27	2661.19	187782	7.83139e+06	-2952.48	2665.59	2663.39	4.39327	4.80021	42.4655	0.741163	6.50714
	15875	187756	7.83152e+06	-2948.45	2660.07	187750	7.83152e+06	-2952.91	2666.18	2663.12	6.10364	6.44497	43.4419	0.758204	8.87649
	16000	187742	7.83165e+06	-2943.98	2653.96	187734	7.83165e+06	-2950.11	2662.34	2658.15	8.37884	8.21994	45.5485	0.794971	11.7376
	16125	187859	7.83176e+06	-2942.86	2652.43	187852	7.83176e+06	-2947.83	2659.22	2655.83	6.7894	7.40251	42.5263	0.742224	10.0446
	16250	187901	7.83188e+06	-2944.59	2654.8	187897	7.83188e+06	-2946.14	2656.91	2655.86	2.11743	4.46781	25.3577	0.442576	4.94417
	16375	187899	7.832e+06	-2944.53	2654.71	187899	7.832e+06	-2944.53	2654.71	2654.71	0	0	0	0	0
	16500	188074	7.83274e+06	-2941.1	2650.03	188074	7.83274e+06	-2941.1	2650.03	2650.03	0	0	0	0	0
	16625	188140	7.83285e+06	-2936.64	2643.95	188136	7.83286e+06	-2939.53	2647.89	2645.92	3.93832	4.7295	39.7846	0.694372	6.15455
	16750	188155	7.83298e+06	-2932.55	2638.39	188143	7.83298e+06	-2940.92	2649.79	2644.09	11.4009	12.2734	42.8894	0.748561	16.7517
	16875	188161	7.8331e+06	-2928.89	2633.41	188140	7.83311e+06	-2943.11	2652.78	2643.09	19.3645	20.9969	42.684	0.744976	28.5632
	17000	188168	7.83323e+06	-2934.72	2641.34	188158	7.83323e+06	-2942.6	2652.08	2646.71	10.7405	10.6399	45.2696	0.790103	15.1184
	17125	188248	7.83335e+06	-2934.63	2641.22	188242	7.83335e+06	-2938.94	2647.09	2644.15	5.87083	6.10266	43.8908	0.766038	8.46813
	17250	188200	7.83348e+06	-2935.95	2643.01	188195	7.83348e+06	-2940.1	2648.67	2645.84	5.65525	4.85108	49.377	0.861791	7.45083
	17375	188201	7.8336e+06	-2933.33	2639.45	188190	7.8336e+06	-2941.7	2650.85	2645.15	11.4039	10.9723	46.1052	0.804687	15.8253
	17500	188291	7.83372e+06	-2934.95	2641.65	188283	7.83372e+06	-2941.59	2650.7	2646.18	9.04915	7.84658	49.0712	0.856455	11.9773
	17625	188217	7.83385e+06	-2935.66	2642.62	188200	7.83386e+06	-2946.53	2657.45	2650.03	14.828	16.9844	41.1222	0.717718	22.5464
	17750	188218	7.83398e+06	-2936.54	2643.82	188206	7.83398e+06	-2946.93	2657.99	2650.91	14.1763	13.0288	47.4153	0.827554	19.254
	17875	188138	7.83412e+06	-2939.22	2647.47	188132	7.83412e+06	-2945.41	2655.92	2651.69	8.44739	5.67842	56.0906	0.978966	10.1786
	18000	188140	7.83424e+06	-2940.29	2648.93	188135	7.83424e+06	-2942.5	2651.94	2650.44	3.01502	4.16515	35.8995	0.626565	5.14187
	18125	188220	7.83436e+06	-2935.4	2642.26	188211	7.83436e+06	-2941.7	2650.85	2646.56	8.5866	8.71358	44.5795	0.778059	12.2334
	18250	188237	7.83448e+06	-2937.74	2645.45	188232	7.83448e+06	-2941.78	2650.96	2648.21	5.50858	5.58789	44.5905	0.778251	7.84659
	18375	188275	7.8346e+06	-2941.59	2650.7	188275	7.8346e+06	-2941.59	2650.7	2650.7	0	0	0	0	0
HH	750	184838	7.81665e+06	-3042	2790.01	184826	7.81665e+06	-3055.04	2808.45	2799.23	18.4322	12.0117	56.9089	0.993247	22.0006
	875	184873	7.81677e+06	-3041.39	2789.15	184860	7.81677e+06	-3056.27	2810.19	2799.67	21.0352	13.6962	56.9316	0.993643	25.1011
	1000	184913	7.81689e+06	-3035.7	2781.14	184899	7.81689e+06	-3049.91	2801.19	2791.16	20.0487	14.3002	54.5008	0.951218	24.6261
	1125	184909	7.81701e+06	-3030.08	2773.23	184887	7.81702e+06	-3049.05	2799.97	2786.6	26.7362	22.1269	50.3888	0.879451	34.7048
	1250	184926	7.81714e+06	-3027.73	2769.93	184903	7.81714e+06	-3051.56	2803.52	2786.73	33.5868	23.4988	55.0217	0.960309	40.991
	1375	184934	7.81726e+06	-3023.72	2764.31	184908	7.81727e+06	-3047.48	2797.75	2781.03	33.4439	25.6359	52.5286	0.916797	42.139
	1500	184889	7.8174e+06	-3024.93	2766	184855	7.8174e+06	-3056.6	2810.66	2788.33	44.653	34.1783	52.5688	0.917499	56.2321
	1625	184898	7.81752e+06	-3027.11	2769.06	184879	7.81752e+06	-3052.15	2804.35	2786.71	35.292	19.1413	61.5259	1.07383	40.1487
	1750	184902	7.81765e+06	-3029.93	2773.02	184879	7.81765e+06	-3060.07	2815.58	2794.3	42.5545	23.0646	61.5422	1.07411	48.4031
	1875	184926	7.81777e+06	-3040.56	2787.98	184904	7.81777e+06	-3068.61	2827.71	2807.85	39.7272	22.2485	60.7498	1.06028	45.5329
	2000	184913	7.8179e+06	-3040.78	2788.29	184887	7.8179e+06	-3069.7	2829.26	2808.78	40.9681	26.6641	56.9419	0.993823	48.8811
	2125	184921	7.81802e+06	-3043.25	2791.78	184897	7.81802e+06	-3066.06	2824.08	2807.93	32.3066	23.7902	53.6324	0.936063	40.1209
	2250	184960	7.81814e+06	-3042.25	2790.37	184926	7.81815e+06	-3063.56	2820.53	2805.45	30.1649	33.5333	41.973	0.732566	45.1044
	2375	184932	7.81827e+06	-3042.75	2791.07	184925	7.81827e+06	-3059.62	2814.94	2803	23.8666	7.2611	73.0783	1.27546	24.9467
	2500	184910	7.8184e+06	-3048.8	2799.62	184893	7.8184e+06	-3065.84	2823.77	2811.69	24.1552	17.4073	54.2218	0.946348	29.774
	2625	184957	7.81852e+06	-3055.25	2808.74	184948	7.81852e+06	-3062.05	2818.39	2813.57	9.64355	9.88324	44.2967	0.773124	13.8086
	2750	185101	7.81863e+06	-3057.84	2812.41	185096	7.81863e+06	-3061.04	2816.95	2814.68	4.53931	5.53701	39.3453	0.686705	7.15987
	2875	185114	7.81875e+06	-3059.33	2814.53	185104	7.81875e+06	-3064.79	2822.28	2818.4	7.75177	10.3372	36.8658	0.64343	12.9208
	3000	185127	7.81888e+06	-3067.75	2826.49	185127	7.81888e+06	-3067.75	2826.49	2826.49	0	0	0	0	0
	3125	185199	7.81912e+06	-3063.94	2821.07	185188	7.81912e+06	-3074.79	2836.51	2828.79	15.4406	11.8505	52.4941	0.916196	19.464
	3250	185236	7.81924e+06	-3060.49	2816.17	185208	7.81924e+06	-3084.69	2850.65	2833.41	34.4748	28.3796	50.5388	0.882069	44.6533
	3375	185250	7.81937e+06	-3062.7	2819.31	185226	7.81937e+06	-3082.62	2847.69	2833.5	28.3782	23.5695	50.2888	0.877704	36.8896
	3500	185303	7.81948e+06	-3063.24	2820.08	185279	7.81949e+06	-3086.32	2852.98	2836.53	32.9025	24.3149	53.5357	0.934373	40.912
	3625	185340	7.81961e+06	-3064.17	2821.4	185316	7.81961e+06	-3083.85	2849.45	2835.42	28.0486	24.3757	49.0076	0.855344	37.1604
	3750	185341	7.81973e+06	-3065.39	2823.13	185319	7.81973e+06	-3083.43	2848.85	2835.99	25.7145	22.4593	48.8657	0.852867	34.1417
	3875	185355	7.81986e+06	-3067.05	2825.49	185329	7.81986e+06	-3089.5	2857.53	2841.51	32.0405	26.2623	50.6599	0.884181	41.4283
	4000	185387	7.81998e+06	-3070.54	2830.46	185355	7.81998e+06	-3098.14	2869.92	2850.19	39.4675	32.7159	50.3435	0.87866	51.2641
	4125	185431	7.8201e+06	-3072.51	2833.26	185398	7.8201e+06	-3101.7	2875.04	2854.15	41.7782	33.3622	51.3907	0.896938	53.4645
	4250	185460	7.82022e+06	-3076.98	2839.63	185420	7.82023e+06	-3107.17	2882.91	2861.27	43.2785	40.3814	46.9833	0.820013	59.1919
	4375	185496	7.82034e+06	-3081.21	2845.67	185466	7.82035e+06	-3105.43	2880.41	2863.04	34.7341	30.3369	48.8659	0.852871	46.1171
	4500	185488	7.82047e+06	-3082.09	2846.93	185469	7.82047e+06	-3096.49	2867.56	2857.24	20.6245	18.345	48.3476	0.843825	27.6027
	4625	185530	7.82059e+06	-3079.42	2843.12	185507	7.82059e+06	-3096.17	2867.1	2855.11	23.9788	23.9118	45.0801	0.786797	33.8638
	4750	185589	7.82071e+06	-3077.1	2839.81	185572	7.82071e+06	-3087.5	2854.67	2847.24	14.862	16.4696	42.0628	0.734135	22.184
	4875	185586	7.82083e+06	-3076.29	2838.65	185575	7.82084e+06	-3083.22	2848.55	2843.6	9.89516	11.306	41.1929	0.718952	15.0246
	5000	185568	7.82096e+06	-3073.74	2835.01	185556	7.82096e+06	-3078.5	2841.8	2838.41	6.78872	11.8802	29.7449	0.519147	13.6831
	5125	185628	7.82108e+06	-3071.74	2832.17	185622	7.82108e+06	-3074.57	2836.2	2834.18	4.03229	6.50447	31.7959	0.554943	7.65294
	5250	185618	7.82121e+06	-3075.64	2837.72	185612	7.82121e+06	-3079.26	2842.89	2840.31	5.16506	6.31348	39.2866	0.685681	8.15708
	5375	185636	7.82133e+06	-3079.55	2843.3	185627	7.82133e+06	-3084.18	2849.92	2846.61	6.61554	8.07853	39.3142	0.686162	10.4416
	5500	185667	7.82145e+06	-3082.58	2847.63	185650	7.82146e+06	-3092.71	2862.13	2854.88	14.5011	17.3465	39.8944	0.696289	22.6094
	5625	185675	7.82158e+06	-3089.25	2857.17	185665	7.82158e+06	-3095.35	2865.92	2861.55	8.74521	10.5196	39.7376	0.693552	13.6799
	5750	185665	7.82171e+06	-3088.5	2856.1	185649	7.82171e+06	-3097.45	2868.93	2862.52	12.8339	16.0467	38.6522	0.674608	20.5476
	5875	185729	7.82182e+06	-3084.75	2850.73	185702	7.82183e+06	-3096.16	2867.08	2858.91	16.3482	27.3117	30.9038	0.539373	31.8307
	6000	185658	7.82196e+06	-3084.89	2850.93	185643	7.82196e+06	-3093.43	2863.16	2857.05	12.231	14.9167	39.3501	0.686789	19.29
	6125	185700	7.82208e+06	-3084.95	2851.02	185688	7.82208e+06	-3094.12	2864.15	2857.59	13.1348	12.5252	46.3609	0.809151	18.1495
	6250	185696	7.82221e+06	-3081.72	2846.4	185688	7.82221e+06	-3086.83	2853.71	2850.06	7.30705	7.88624	42.8169	0.747295	10.7511
	6375	185722	7.82233e+06	-3076.91	2839.53	185713	7.82233e+06	-3084.59	2850.5	2845.02	10.9696	9.57197	48.8923	0.853332	14.5586
	6500	185713	7.82246e+06	-3070.11	2829.84	185703	7.82246e+06	-3081.6	2846.23	2838.04	16.3857	10.2256	58.0336	1.01288	19.3145
	6625	185732	7.82258e+06	-3067.35	2825.92	185720	7.82258e+06	-3077.36	2840.18	2833.05	14.259	11.8406	50.2939	0.877794	18.5342
	6750	185719	7.82271e+06	-3063.03	2819.78	185694	7822711	-3082.5	2847.52	2833.65	27.7381	24.8793	48.11	0.839678	37.261
	6875	185795	7.82282e+06	-3062.15	2818.53	185753	7.82283e+06	-3088.74	2856.44	2837.49	37.9144	43.0432	41.3751	0.722131	57.3605
	7000	185770	7.82295e+06	-3058.44	2813.26	185731	7.82296e+06	-3089.56	2857.62	2835.44	44.3531	39.2105	48.5216	0.846862	59.2001
	7125	185808	7.82307e+06	-3057.35	2811.72	185772	7.82308e+06	-3084.34	2850.15	2830.93	38.4277	36.4271	46.531	0.812119	52.9492
	7250	185859	7.82319e+06	-3055	2808.39	185824	7.8232e+06	-3081.11	2845.53	2826.96	37.1413	35.2178	46.5227	0.811975	51.1837
	7375	185920	7.82331e+06	-3054.11	2807.13	185887	7.82332e+06	-3077.03	2839.71	2823.42	32.5774	33.2109	44.4483	0.775769	46.5215
	7500	185991	7.82343e+06	-3051.59	2803.56	185953	7.82343e+06	-3080.43	2844.56	2824.06	40.9976	38.8285	46.5565	0.812564	56.4664
	7625	186027	7.82355e+06	-3051.28	2803.12	185966	7.82356e+06	-3092.59	2861.96	2832.54	58.8369	62.1449	43.4338	0.758062	85.579
	7750	186065	7.82367e+06	-3048.22	2798.8	186011	7.82368e+06	-3087.12	2854.12	2826.46	55.3281	53.7141	45.848	0.800198	77.113
	7875	186124	7.82379e+06	-3046.77	2796.75	186081	7.82379e+06	-3082.47	2847.47	2822.11	50.7266	43.1238	49.6314	0.866231	66.5797
	8000	186165	7.82391e+06	-3043.38	2791.96	186126	7.82392e+06	-3074.55	2836.17	2814.06	44.2089	39.2713	48.3849	0.844476	59.1325
	8125	186198	7.82403e+06	-3046.5	2796.37	186157	7.82404e+06	-3077.52	2840.41	2818.39	44.0395	41.37	46.7902	0.816644	60.4232
	8250	186204	7.82416e+06	-3045.75	2795.31	186165	7.82416e+06	-3079.62	2843.4	2819.35	48.0962	39.182	50.8317	0.887181	62.0361
	8375	186238	7.82428e+06	-3040.48	2787.87	186197	7.82428e+06	-3071.73	2832.15	2810.01	44.2812	40.735	47.3886	0.827087	60.1678
	8500	186272	7.8244e+06	-3036.31	2782	186228	7.82441e+06	-3068.5	2827.55	2804.77	45.5585	44.9708	45.3719	0.791889	64.0152
	8625	186324	7.82452e+06	-3038.47	2785.04	186293	7.82452e+06	-3059.32	2814.51	2799.78	29.4753	30.9112	43.6379	0.761625	42.7118
	8750	186324	7.82465e+06	-3036.56	2782.35	186294	7.82465e+06	-3056.73	2810.84	2796.59	28.4932	29.8929	43.6267	0.761429	41.297
	8875	186382	7.82476e+06	-3035.21	2780.45	186352	7.82477e+06	-3056.34	2810.29	2795.37	29.8408	30.4473	44.4237	0.775339	42.6323
	9000	186411	7.82489e+06	-3029.71	2772.71	186383	7.82489e+06	-3049.56	2800.69	2786.7	27.9771	28.6016	44.3676	0.774361	40.0097
	9125	186430	7.82501e+06	-3022.49	2762.58	186405	7.82501e+06	-3041.15	2788.81	2775.7	26.2329	25.203	46.147	0.805417	36.378
	9250	186485	7.82513e+06	-3019.64	2758.59	186464	7.82513e+06	-3035.29	2780.56	2769.57	21.97	21.2599	45.941	0.801822	30.5723
	9375	186505	7.82525e+06	-3016.58	2754.31	186489	7.82525e+06	-3028.58	2771.13	2762.72	16.819	16.2886	45.918	0.80142	23.4136
	9500	186544	7.82537e+06	-3015.98	2753.47	186530	7.82538e+06	-3026.84	2768.68	2761.08	15.2154	13.938	47.5088	0.829185	20.6344
	9625	186671	7.82548e+06	-3012.58	2748.72	186652	7.82549e+06	-3023.99	2764.68	2756.7	15.9696	18.8896	40.2118	0.701828	24.7355
	9750	186691	7.82561e+06	-3009.67	2744.65	186673	7.82561e+06	-3020.49	2759.78	2752.22	15.1279	17.8911	40.2163	0.701907	23.4295
	9875	186707	7.82573e+06	-3011.26	2746.87	186700	7.82573e+06	-3014.08	2750.81	2748.84	3.93962	7.24127	28.5485	0.498265	8.24358
	10000	186722	7.82585e+06	-3007.33	2741.39	186707	7.82586e+06	-3015.54	2752.85	2747.12	11.465	14.583	38.174	0.666261	18.5502
	10125	186727	7.82598e+06	-3008.34	2742.8	186721	7.82598e+06	-3013.5	2750	2746.4	7.20452	6.37427	48.4989	0.846466	9.61959
	10250	186760	7.8261e+06	-3006.26	2739.9	186745	7.8261e+06	-3016.17	2753.73	2746.81	13.8379	15.9152	41.0063	0.715695	21.0899
	10375	186815	7.82622e+06	-3008.21	2742.61	186794	7.82622e+06	-3018.95	2757.62	2750.12	15.0086	20.7564	35.8701	0.626051	25.6141
	10500	186833	7.82634e+06	-3009.76	2744.78	186819	7.82635e+06	-3019.32	2758.14	2751.46	13.3638	14.0173	43.6327	0.761535	19.3669
	10625	186856	7.82647e+06	-3009.91	2744.99	186843	7.82647e+06	-3018.07	2756.39	2750.69	11.4047	13.2422	40.7364	0.710984	17.4764
	10750	186830	7.8266e+06	-3011.81	2747.64	186816	7.8266e+06	-3017.5	2755.59	2751.62	7.95429	14.0682	29.4842	0.514596	16.1612
	10875	186801	7.82673e+06	-3013.25	2749.65	186792	7.82673e+06	-3019.14	2757.89	2753.77	8.23805	9.43917	41.1129	0.717555	12.5285
	11000	186835	7.82685e+06	-3009.5	2744.41	186822	7.82685e+06	-3017.79	2756	2750.21	11.5851	13.2818	41.0966	0.717271	17.6245
	11125	186931	7.82696e+06	-3009.2	2744	186923	7.82696e+06	-3014.61	2751.55	2747.77	7.55603	8.37127	42.0699	0.734258	11.277
	11250	186957	7.82708e+06	-3009.7	2744.69	186942	7.82709e+06	-3017.96	2756.24	2750.47	11.5439	15.1275	37.3474	0.651835	19.029
	11375	186973	7.82721e+06	-3009.81	2744.85	186957	7.82721e+06	-3019.16	2757.92	2751.38	13.07	16.58	38.2488	0.667567	21.1121
	11500	187005	7.82733e+06	-3009.31	2744.15	186996	7.82733e+06	-3014.2	2750.98	2747.56	6.82942	9.03737	37.0779	0.647131	11.3276
	11625	186922	7.82747e+06	-3006.24	2739.87	186903	7.82747e+06	-3014.26	2751.06	2745.47	11.1953	18.7481	30.8431	0.538314	21.8364
	11750	187011	7.82758e+06	-3007.73	2741.95	186999	7.82758e+06	-3014.65	2751.61	2746.78	9.66274	11.7798	39.3614	0.686986	15.2359
	11875	186987	7.82771e+06	-3008.76	2743.38	186968	7.82771e+06	-3014	2750.7	2747.04	7.31733	19.898	20.1906	0.352393	21.2008
	12000	187033	7.82783e+06	-3004.97	2738.1	187020	7.82783e+06	-3014	2750.7	2744.4	12.602	13.494	43.0423	0.75123	18.4634
	12125	187064	7.82795e+06	-3006.32	2739.98	187056	7.82795e+06	-3011.68	2747.46	2743.72	7.47904	8.00782	43.0445	0.751267	10.9572
	12250	186996	7.82809e+06	-3004.76	2737.8	186991	7.82809e+06	-3010.05	2745.18	2741.49	7.37748	5.09295	55.3813	0.966585	8.96467
	12375	187033	7.82821e+06	-3002.49	2734.64	187025	7.82821e+06	-3011.71	2747.5	2741.07	12.857	8.85499	55.4437	0.967675	15.6113
	12500	187089	7.82833e+06	-3004.11	2736.9	187079	7.82833e+06	-3011.79	2747.61	2742.26	10.7125	9.73191	47.7461	0.833326	14.473
	12625	187178	7.82844e+06	-3002.43	2734.56	187168	7.82844e+06	-3010.25	2745.46	2740.01	10.902	9.91299	47.7204	0.832878	14.735
	12750	187211	7.82856e+06	-3003.2	2735.63	187194	7.82857e+06	-3014.69	2751.66	2743.65	16.0322	17.406	42.6473	0.744335	23.6644
	12875	187197	7.82869e+06	-3007.05	2741	187187	7.82869e+06	-3013.39	2749.85	2745.42	8.85003	9.96516	41.6082	0.7262	13.3277
	13000	187208	7.82882e+06	-3003.07	2735.45	187194	7.82882e+06	-3009.34	2744.19	2739.82	8.74074	13.6651	32.6046	0.569057	16.2215
	13125	187228	7.82894e+06	-3002.12	2734.13	187221	7.82894e+06	-3006.33	2739.99	2737.06	5.86515	7.36285	38.5404	0.672656	9.41337
	13250	187287	7.82906e+06	-3001.08	2732.68	187277	7.82906e+06	-3006.27	2739.91	2736.29	7.22912	10.3769	34.8632	0.608478	12.6467
	13375	187440	7.82916e+06	-2993.52	2722.17	187416	7.82917e+06	-3003.5	2736.05	2729.11	13.8774	23.9924	30.0454	0.524391	27.7167
	13500	187484	7.82928e+06	-2995.9	2725.48	187476	7.82929e+06	-2999.16	2730.01	2727.74	4.53163	7.83666	30.0391	0.524281	9.05257
	13625	187528	7.8294e+06	-2994.88	2724.06	187528	7.8294e+06	-2994.88	2724.06	2724.06	0	0	0	0	0
	13750	187559	7.82953e+06	-2991.28	2719.06	187545	7.82953e+06	-2997.99	2728.38	2723.72	9.31843	14.5136	32.7025	0.570765	17.2475
	13875	187583	7.82965e+06	-2990.16	2717.51	187570	7.82965e+06	-2997.08	2727.12	2722.31	9.60684	13.0611	36.3356	0.634176	16.2137
	14000	187593	7.82977e+06	-2986.24	2712.08	187579	7.82978e+06	-2992.47	2720.71	2716.4	8.63672	13.5957	32.4259	0.565938	16.107
	14125	187596	7.8299e+06	-2985.68	2711.3	187585	7.8299e+06	-2992.15	2720.27	2715.79	8.96812	11.0628	39.0301	0.681204	14.2412
	14250	187565	7.83003e+06	-2984.36	2709.48	187554	7.83003e+06	-2990.56	2718.07	2713.77	8.58973	10.6088	38.9963	0.680614	13.6503
	14375	187572	7.83016e+06	-2982.91	2707.47	187565	7.83016e+06	-2987.67	2714.06	2710.76	6.58994	7.18048	42.5444	0.74254	9.74611
	14500	187555	7.83028e+06	-2981.93	2706.11	187546	7.83029e+06	-2988.51	2715.22	2710.67	9.10942	9.21844	44.6592	0.77945	12.96
	14625	187536	7.83041e+06	-2980.95	2704.76	187525	7.83041e+06	-2987.75	2714.17	2709.46	9.41127	10.8209	41.0144	0.715836	14.341
	14750	187583	7.83053e+06	-2979.46	2702.7	187577	7.83053e+06	-2983.69	2708.55	2705.62	5.84896	6.04187	44.0706	0.769177	8.4092
	14875	187589	7.83066e+06	-2978.43	2701.28	187583	7.83066e+06	-2983.02	2707.62	2704.45	6.34496	6.54543	44.109	0.769847	9.11598
	15000	187613	7.83078e+06	-2976.72	2698.91	187609	7.83078e+06	-2981.5	2705.52	2702.22	6.60405	3.69005	60.8055	1.06126	7.56505
	15125	187689	7.8309e+06	-2974.97	2696.5	187681	7.8309e+06	-2979.5	2702.75	2699.63	6.25475	7.56376	39.5886	0.690951	9.8149
	15250	187796	7.83101e+06	-2972.62	2693.26	187785	7.83101e+06	-2979.13	2702.24	2697.75	8.98454	10.4575	40.6674	0.709781	13.787
	15375	187840	7.83113e+06	-2972.69	2693.36	187832	7.83113e+06	-2977.77	2700.36	2696.86	7.00947	8.15915	40.6657	0.70975	10.7566
	15500	187860	7.83125e+06	-2969.75	2689.3	187850	7.83125e+06	-2975.03	2696.58	2692.94	7.27854	9.34002	37.9288	0.661982	11.8412
	15625	187753	7.83139e+06	-2973.1	2693.92	187746	7.83139e+06	-2977.81	2700.42	2697.17	6.49942	6.80842	43.6699	0.762183	9.4126
	15750	187724	7.83152e+06	-2970.71	2690.63	187717	7.83152e+06	-2975.48	2697.2	2693.91	6.57704	6.89896	43.6316	0.761515	9.53169
	15875	187709	7.83165e+06	-2968.13	2687.07	187701	7.83165e+06	-2971.31	2691.45	2689.26	4.37976	7.1309	31.558	0.550791	8.36852
	16000	187822	7.83176e+06	-2966.59	2684.95	187821	7.83176e+06	-2969.25	2688.62	2686.78	3.66137	1.10887	73.1507	1.27672	3.8256
	16125	187869	7.83188e+06	-2965.3	2683.18	187860	7.83188e+06	-2968.75	2687.93	2685.55	4.74735	9.27793	27.098	0.47295	10.422
	16250	187882	7.83201e+06	-2962.51	2679.34	187879	7.83201e+06	-2966.19	2684.4	2681.87	5.05932	3.37877	56.2638	0.981988	6.08381
	16375	187908	7.83213e+06	-2961.95	2678.57	187905	7.83213e+06	-2964	2681.39	2679.98	2.81707	3.9332	35.6113	0.621535	4.83798
	16500	187953	7.83225e+06	-2958.36	2673.65	187943	7.83225e+06	-2962.5	2679.33	2676.49	5.68427	9.64137	30.5224	0.532716	11.1923
	16625	187924	7.83238e+06	-2961.59	2678.08	187924	7.83238e+06	-2961.59	2678.08	2678.08	0	0	0	0	0
	16750	187955	7.8325e+06	-2960	2675.9	187955	7.8325e+06	-2960.53	2676.62	2676.26	0.727656	0.534603	53.6956	0.937165	0.902931
	16875	188009	7.83262e+06	-2958.35	2673.63	188004	7.83262e+06	-2960.93	2677.17	2675.4	3.54144	4.82996	36.2497	0.632677	5.98918
	17000	188047	7.83274e+06	-2959.06	2674.61	188042	7.83274e+06	-2960.77	2676.95	2675.78	2.34745	4.46781	27.718	0.483771	5.04696
	17125	188114	7.83286e+06	-2955.46	2669.67	188107	7.83286e+06	-2960.38	2676.42	2673.04	6.74954	7.02915	43.8375	0.765108	9.74502
	17250	188130	7.83298e+06	-2949.93	2662.1	188106	7.83299e+06	-2965.84	2683.92	2673.01	21.826	23.2867	43.1455	0.753032	31.9162
	17375	188132	7.83311e+06	-2948.48	2660.11	188114	7.83311e+06	-2959.92	2675.79	2667.95	15.6745	17.5785	41.7229	0.728203	23.5519
	17500	188151	7.83323e+06	-2950.88	2663.4	188139	7.83323e+06	-2959.13	2674.7	2669.05	11.3068	12.2635	42.6756	0.74483	16.6804
	17625	188228	7.83335e+06	-2950.75	2663.22	188218	7.83335e+06	-2957.68	2672.71	2667.97	9.49517	10.6597	41.6932	0.727683	14.2754
	17750	188175	7.83348e+06	-2951.66	2664.46	188157	7.83348e+06	-2962.01	2678.66	2671.56	14.1936	18.1937	37.9591	0.662511	23.0753
	17875	188180	7833606	-2949.29	2661.22	188157	7.83361e+06	-2967.06	2685.6	2673.41	24.38	23.3177	46.2759	0.807666	33.7357
	18000	188278	7.83372e+06	-2950	2662.19	188258	7.83372e+06	-2962.78	2679.72	2670.95	17.5234	19.7764	41.5433	0.725068	26.423
	18125	188193	7.83386e+06	-2951.01	2663.57	188170	7.83386e+06	-2966.07	2684.24	2673.91	20.6645	23.5384	41.28	0.720472	31.3222
	18250	188198	7.83398e+06	-2953.22	2666.6	188183	7.83398e+06	-2964.88	2682.6	2674.6	16.0019	14.6127	47.5981	0.830744	21.6701
	18375	188130	7.83412e+06	-2953.25	2666.64	188122	7.83412e+06	-2957.05	2671.85	2669.25	5.20822	8.01774	33.0073	0.576085	9.56084
	18500	188125	7.83424e+06	-2956.48	2671.07	188121	7.83424e+06	-2960.99	2677.26	2674.16	6.18877	4.1242	56.3205	0.982978	7.43706
	18625	188198	7.83436e+06	-2951.59	2664.37	188174	7.83436e+06	-2968.5	2687.58	2675.98	23.2146	23.397	44.7758	0.781485	32.9597
	18750	188213	7.83448e+06	-2954.25	2668.01	188204	7.83449e+06	-2962.41	2679.21	2673.61	11.1959	9.06711	50.9974	0.890072	14.407
	18875	188252	7.83461e+06	-2953.75	2667.33	188242	7.83461e+06	-2960.33	2676.35	2671.84	9.02417	10.3868	40.9845	0.715314	13.7594
	19000	188323	7.83472e+06	-2954.52	2668.38	188323	7.83472e+06	-2954.52	2668.38	2668.38	0	0	0	0	0
HG	750	184821	7.81665e+06	-3060.09	2815.61	184806	7.81665e+06	-3076.86	2839.46	2827.53	23.8585	15.4401	57.0909	0.996425	28.4187
	875	184855	7.81677e+06	-3061.7	2817.89	184834	7.81677e+06	-3080.96	2845.32	2831.6	27.4262	20.533	53.1791	0.928151	34.2608
	1000	184886	7.81689e+06	-3062.6	2819.17	184875	7.81689e+06	-3074.26	2835.76	2827.46	16.5883	11.7487	54.6918	0.954551	20.3274
	1125	184872	7.81702e+06	-3063.83	2820.91	184858	7.81702e+06	-3078.49	2841.79	2831.35	20.8747	14.5136	55.1902	0.96325	25.4243
	1250	184891	7.81714e+06	-3064.42	2821.75	184873	7.81715e+06	-3082.11	2846.96	2834.36	25.2063	17.4371	55.3255	0.965612	30.6498
	1375	184891	7.81727e+06	-3063.73	2820.77	184871	7.81727e+06	-3081.84	2846.57	2833.67	25.8007	19.5444	52.8555	0.922503	32.3676
	1500	184847	7.8174e+06	-3066	2824	184835	7.8174e+06	-3080.92	2845.26	2834.63	21.2607	12.5463	59.4543	1.03767	24.6866
	1625	184865	7.81752e+06	-3070.06	2829.77	184855	7.81753e+06	-3083.02	2848.26	2839.02	18.4861	9.90437	61.8187	1.07894	20.9722
	1750	184871	7.81765e+06	-3070.1	2829.83	184856	7.81765e+06	-3090.72	2859.28	2844.56	29.4489	15.9945	61.4924	1.07325	33.5122
	1875	184913	7.81777e+06	-3057.51	2811.95	184878	7.81778e+06	-3099.33	2871.63	2841.79	59.688	35.1359	59.5164	1.03876	69.2617
	2000	184897	7.8179e+06	-3060.89	2816.74	184869	7.8179e+06	-3096.82	2868.03	2842.38	51.2886	27.7135	61.6157	1.0754	58.2972
	2125	184899	7.81802e+06	-3063.51	2820.46	184874	7.81803e+06	-3096.06	2866.94	2843.7	46.4777	24.8905	61.8294	1.07913	52.723
	2250	184931	7.81815e+06	-3059.17	2814.3	184896	7.81815e+06	-3093.89	2863.82	2839.06	49.5243	34.894	54.8321	0.957001	60.5825
	2375	184922	7.81827e+06	-3062.94	2819.65	184906	7.81828e+06	-3082.66	2847.75	2833.7	28.0946	16.802	59.1184	1.03181	32.7355
	2500	184892	7.8184e+06	-3066.86	2825.22	184875	7.81841e+06	-3083.97	2849.62	2837.42	24.3968	17.4668	54.3993	0.949447	30.0049
	2625	184934	7.81852e+06	-3074.86	2836.61	184920	7.81853e+06	-3087.41	2854.54	2845.58	17.9278	13.8475	52.3173	0.91311	22.653
	2750	185080	7.81863e+06	-3075.2	2837.1	185067	7.81863e+06	-3085.16	2851.32	2844.21	14.2236	12.4657	48.7683	0.851167	18.9131
	2875	185092	7.81876e+06	-3077.1	2839.81	185079	7.81876e+06	-3086.02	2852.55	2846.18	12.744	12.5662	45.4026	0.792425	17.8975
	3000	185099	7.81888e+06	-3084.46	2850.32	185093	7.81888e+06	-3089.51	2857.55	2853.93	7.22754	6.43376	48.3254	0.843437	9.6763
	3125	185141	7.819e+06	-3084.46	2850.32	185135	7.819e+06	-3089.04	2856.87	2853.6	6.55439	5.14382	51.8755	0.905398	8.3318
	3250	185179	7.81912e+06	-3082.49	2847.5	185165	7.81912e+06	-3095.54	2866.19	2856.85	18.6893	14.2506	52.6745	0.919343	23.5025
	3375	185209	7.81924e+06	-3083.55	2849.02	185187	7.81925e+06	-3102.87	2876.72	2862.87	27.706	22.6516	50.7316	0.885433	35.7871
	3500	185225	7.81937e+06	-3083.87	2849.47	185199	7.81937e+06	-3105.62	2880.68	2865.08	31.2061	25.9795	50.2222	0.876542	40.6049
	3625	185278	7.81949e+06	-3084.44	2850.29	185250	7.81949e+06	-3108.09	2884.24	2867.26	33.9487	28.3796	50.1059	0.874513	44.2484
	3750	185314	7.81961e+06	-3085.09	2851.22	185289	7.81961e+06	-3105.03	2879.83	2865.53	28.6121	25.0616	48.7846	0.851451	38.036
	3875	185318	7.81973e+06	-3084.68	2850.63	185293	7.81974e+06	-3105.87	2881.04	2865.84	30.4078	24.7887	50.8128	0.88685	39.2316
	4000	185331	7.81986e+06	-3088.11	2855.54	185304	7.81986e+06	-3110.86	2888.23	2871.89	32.6905	26.7262	50.7322	0.885443	42.2251
	4125	185362	7.81998e+06	-3091.86	2860.91	185336	7.81998e+06	-3113.98	2892.73	2876.82	31.8201	26.8775	49.8132	0.869404	41.6524
	4250	185404	7.8201e+06	-3095.05	2865.49	185373	7.82011e+06	-3120.18	2901.69	2883.59	36.2043	30.5577	49.8345	0.869776	47.3764
	4375	185428	7.82022e+06	-3100.76	2873.69	185401	7.82023e+06	-3121.17	2903.12	2888.41	29.4357	27.2906	47.1657	0.823196	40.1402
	4500	185467	7.82035e+06	-3103.26	2877.28	185441	7.82035e+06	-3122.02	2904.35	2890.82	27.0705	26.2214	45.9129	0.801331	37.6878
	4625	185462	7.82047e+06	-3102.26	2875.85	185444	7.82047e+06	-3116.18	2895.91	2885.88	20.0646	17.7496	48.5032	0.84654	26.7887
	4750	185502	7.82059e+06	-3099.67	2872.12	185482	7.8206e+06	-3113.14	2891.52	2881.82	19.3985	19.2332	45.2452	0.789677	27.317
	4875	185553	7.82071e+06	-3099.75	2872.24	185538	7.82071e+06	-3109.46	2886.21	2879.23	13.9756	15.3707	42.2783	0.737895	20.7744
	5000	185551	7.82084e+06	-3098.05	2869.8	185541	7.82084e+06	-3104.1	2878.49	2874.14	8.69793	9.86341	41.4071	0.72269	13.1507
	5125	185534	7.82097e+06	-3096.19	2867.12	185530	7.82097e+06	-3098.21	2870.02	2868.57	2.9005	3.28824	41.415	0.722829	4.38468
	5250	185586	7.82109e+06	-3095.56	2866.22	185582	7.82109e+06	-3096.99	2868.27	2867.25	2.05272	3.82284	28.2341	0.492778	4.3391
	5375	185583	7.82121e+06	-3095.61	2866.29	185574	7.82121e+06	-3100.96	2873.98	2870.13	7.6847	9.3288	39.4803	0.689062	12.0864
	5500	185595	7.82134e+06	-3104.03	2878.39	185591	7.82134e+06	-3105.37	2880.32	2879.36	1.92872	4.01383	25.6651	0.447941	4.45317
	5625	185624	7.82146e+06	-3107.85	2883.89	185611	7.82146e+06	-3115.38	2894.75	2889.32	10.8622	12.9693	39.9473	0.697211	16.9171
	5750	185637	7.82158e+06	-3114.15	2892.98	185623	7.82159e+06	-3119.18	2900.25	2896.61	7.26756	14.2308	27.0531	0.472166	15.9791
	5875	185622	7.82171e+06	-3113.26	2891.69	185610	7.82171e+06	-3120.86	2902.68	2897.19	10.9822	12.323	41.7072	0.727928	16.5065
	6000	185679	7.82183e+06	-3111.32	2888.9	185667	7.82183e+06	-3116.4	2896.23	2892.56	7.33325	11.678	32.1269	0.560719	13.7896
	6125	185616	7.82196e+06	-3111.84	2889.65	185608	7.82197e+06	-3117.97	2898.5	2894.07	8.85192	8.29927	46.8456	0.81761	12.134
	6250	185675	7.82208e+06	-3108	2884.11	185653	7.82209e+06	-3119.51	2900.72	2892.42	16.6147	21.663	37.4869	0.654269	27.3008
	6375	185667	7.82221e+06	-3105.09	2879.92	185655	7.82221e+06	-3115.1	2894.35	2887.13	14.4326	12.4955	49.1147	0.857213	19.0902
	6500	185693	7.82233e+06	-3101.38	2874.58	185683	7.82233e+06	-3110.25	2887.35	2880.97	12.7715	10.1462	51.5349	0.899453	16.3113
	6625	185692	7.82246e+06	-3094.34	2864.47	185681	7.82246e+06	-3106	2881.23	2872.85	16.7584	10.3782	58.2309	1.01632	19.7117
	6750	185702	7.82258e+06	-3092.29	2861.53	185685	7.82259e+06	-3107.5	2883.39	2872.46	21.8588	17.9717	50.5739	0.882681	28.2982
	6875	185687	7.82271e+06	-3088.39	2855.94	185663	7.82272e+06	-3107.19	2882.94	2869.44	26.9999	24.0334	48.3268	0.843462	36.1469
	7000	185759	7.82283e+06	-3085.42	2851.69	185726	7.82283e+06	-3106.05	2881.3	2866.5	29.6086	32.8586	42.0217	0.733417	44.2307
	7125	185738	7.82296e+06	-3084.21	2849.96	185709	7.82296e+06	-3107.47	2883.35	2866.65	33.3843	29.6808	48.3609	0.844057	44.6706
	7250	185774	7.82308e+06	-3082.62	2847.69	185745	7.82308e+06	-3104.93	2879.69	2863.69	31.9996	29.8321	47.0077	0.82044	43.7485
	7375	185824	7.8232e+06	-3079.92	2843.83	185795	7.8232e+06	-3101.54	2874.81	2859.32	30.9797	29.0556	46.8357	0.817436	42.4732
	7500	185884	7.82332e+06	-3078.94	2842.43	185853	7.82332e+06	-3101.61	2874.91	2858.67	32.4795	31.9084	45.5082	0.794268	45.5309
	7625	185953	7.82343e+06	-3078.56	2841.89	185917	7.82344e+06	-3102.77	2876.58	2859.23	34.6902	35.9037	44.0152	0.768211	49.9248
	7750	185990	7.82355e+06	-3077.57	2840.48	185941	7.82356e+06	-3109.36	2886.07	2863.27	45.5925	49.4684	42.6652	0.744648	67.274
	7875	186030	7.82368e+06	-3073.06	2834.05	185982	7.82368e+06	-3110.06	2887.08	2860.56	53.0321	48.1064	47.7882	0.834062	71.6005
	8000	186095	7.82379e+06	-3071.32	2831.57	186053	7.8238e+06	-3106.16	2881.46	2856.51	49.891	42.1055	49.8373	0.869825	65.2839
	8125	186133	7.82391e+06	-3068.93	2828.17	186096	7.82392e+06	-3098.34	2870.21	2849.19	42.0462	36.9729	48.6735	0.849514	55.99
	8250	186165	7.82404e+06	-3073	2833.96	186127	7.82404e+06	-3102.24	2875.82	2854.89	41.8567	37.7295	47.9686	0.83721	56.3516
	8375	186176	7.82416e+06	-3070.39	2830.24	186141	7.82417e+06	-3098.79	2870.86	2850.55	40.6147	35.8429	48.5713	0.847728	54.1689
	8500	186204	7.82428e+06	-3066.75	2825.06	186163	7.82429e+06	-3098.36	2870.24	2847.65	45.1757	41.1876	47.6439	0.831544	61.1332
	8625	186237	7.8244e+06	-3061.95	2818.24	186198	7.82441e+06	-3089.96	2858.19	2838.22	39.9458	39.7464	45.1434	0.7879	56.351
	8750	186287	7.82452e+06	-3063.54	2820.5	186255	7.82453e+06	-3085.31	2851.53	2836.02	31.0314	32.2719	43.8775	0.765806	44.7708
	8875	186284	7.82465e+06	-3063.49	2820.43	186259	7.82465e+06	-3083.31	2848.67	2834.55	28.2425	25.8691	47.5114	0.829231	38.2995
	9000	186347	7.82477e+06	-3060.38	2816.02	186324	7.82477e+06	-3075.75	2837.88	2826.95	21.8638	22.3998	44.3062	0.773289	31.3014
	9125	186372	7.82489e+06	-3057.02	2811.25	186344	7.8249e+06	-3076.43	2838.85	2825.05	27.5987	27.9666	44.6207	0.778778	39.2915
	9250	186394	7.82501e+06	-3049.58	2800.72	186361	7.82502e+06	-3074.1	2835.53	2818.12	34.8095	32.8772	46.6352	0.813938	47.8812
	9375	186445	7.82513e+06	-3049.6	2800.75	186426	7.82514e+06	-3063.76	2820.82	2810.78	20.0685	19.2431	46.2028	0.806391	27.8036
	9500	186465	7.82526e+06	-3046.35	2796.15	186450	7.82526e+06	-3057.08	2811.34	2803.75	15.1827	14.5731	46.1738	0.805884	21.045
	9625	186508	7.82538e+06	-3044.47	2793.5	186495	7.82538e+06	-3054.53	2807.72	2800.61	14.2245	12.9197	47.752	0.833429	19.216
	9750	186624	7.82549e+06	-3041.47	2789.27	186611	7.82549e+06	-3049.27	2800.28	2794.77	11.0141	12.9184	40.4506	0.705996	16.9763
	9875	186647	7.82561e+06	-3036.46	2782.21	186634	7.82561e+06	-3044.41	2793.41	2787.81	11.2079	13.1715	40.3951	0.705028	17.2946
	10000	186664	7.82574e+06	-3036.37	2782.08	186654	7.82574e+06	-3042.11	2790.17	2786.12	8.08907	9.95394	39.099	0.682407	12.8263
	10125	186675	7.82586e+06	-3034.1	2778.88	186663	7.82586e+06	-3040.77	2788.28	2783.58	9.39413	11.8393	38.431	0.670748	15.1135
	10250	186682	7.82599e+06	-3035.15	2780.36	186674	7.82599e+06	-3039.8	2786.91	2783.64	6.54922	7.99661	39.3175	0.686219	10.3363
	10375	186719	7.82611e+06	-3032.39	2776.48	186705	7.82611e+06	-3040.97	2788.56	2782.52	12.0812	13.7768	41.2484	0.71992	18.3236
	10500	186763	7.82623e+06	-3035.24	2780.49	186744	7.82623e+06	-3045.24	2794.59	2787.54	14.0971	19.3336	36.0976	0.630021	23.9273
	10625	186795	7.82635e+06	-3036.16	2781.78	186780	7.82635e+06	-3046.14	2795.86	2788.82	14.073	14.6339	43.8808	0.765864	20.3027
	10750	186812	7.82647e+06	-3037.08	2783.08	186803	7.82647e+06	-3043.05	2791.49	2787.29	8.41546	9.70216	40.9377	0.714498	12.8434
	10875	186788	7.8266e+06	-3037.97	2784.33	186775	7.8266e+06	-3045.44	2794.87	2789.6	10.5355	12.2424	40.7146	0.710603	16.1516
	11000	186760	7.82673e+06	-3039.57	2786.59	186749	7.82673e+06	-3046.5	2796.37	2791.48	9.77816	11.1051	41.3644	0.721944	14.7965
	11125	186791	7.82685e+06	-3037.04	2783.02	186780	7.82686e+06	-3044.35	2793.33	2788.18	10.3065	11.306	42.3522	0.739185	15.2986
	11250	186892	7.82697e+06	-3034.76	2779.81	186875	7.82697e+06	-3045.62	2795.12	2787.47	15.3092	17.0736	41.8811	0.730964	22.9321
	11375	186910	7.82709e+06	-3035.57	2780.95	186895	7.82709e+06	-3043.51	2792.14	2786.55	11.1905	14.5532	37.558	0.65551	18.3582
	11500	186926	7.82721e+06	-3036.29	2781.97	186914	7.82722e+06	-3043.45	2792.06	2787.01	10.0923	12.6977	38.4782	0.67157	16.2199
	11625	186958	7.82734e+06	-3034.77	2779.83	186951	7.82734e+06	-3038.59	2785.21	2782.52	5.37882	7.0602	37.302	0.651043	8.8757
	11750	186875	7.82747e+06	-3032.89	2777.18	186860	7.82748e+06	-3042.53	2790.76	2783.97	13.5783	14.7033	42.7222	0.745643	20.0139
	11875	186963	7.82759e+06	-3036.3	2781.98	186953	7.82759e+06	-3041.84	2789.79	2785.88	7.80679	9.43056	39.6186	0.691475	12.2426
	12000	186934	7.82772e+06	-3035.97	2781.52	186927	7.82772e+06	-3040.21	2787.49	2784.5	5.97296	7.23136	39.5561	0.690383	9.37917
	12125	186989	7.82784e+06	-3034.35	2779.24	186982	7.82784e+06	-3039.37	2786.31	2782.77	7.06892	7.51288	43.2561	0.754961	10.3157
	12250	187024	7.82796e+06	-3033.35	2777.83	187015	7.82796e+06	-3039.15	2786	2781.91	8.16565	8.66401	43.3039	0.755795	11.9056
	12375	186969	7.82809e+06	-3032.8	2777.06	186965	7.82809e+06	-3037.34	2783.45	2780.25	6.38927	4.35615	55.7142	0.972396	7.73297
	12500	187007	7.82821e+06	-3030.02	2773.15	186999	7.82821e+06	-3036.43	2782.16	2777.66	9.01554	8.01774	48.3525	0.843911	12.065
	12625	187057	7.82833e+06	-3029.7	2772.7	187045	7.82833e+06	-3039.24	2786.12	2779.41	13.4233	12.0924	47.9859	0.837512	18.0668
	12750	187140	7.82845e+06	-3029.76	2772.78	187128	7.82845e+06	-3038.25	2784.73	2778.76	11.9441	12.8477	42.9126	0.748965	17.5421
	12875	187171	7.82857e+06	-3029.98	2773.09	187156	7.82857e+06	-3040	2787.19	2780.14	14.1011	15.1672	42.9139	0.748989	20.7095
	13000	187160	7.8287e+06	-3030.74	2774.16	187146	7.8287e+06	-3040.17	2787.43	2780.8	13.2728	14.8162	41.8548	0.730504	19.8919
	13125	187163	7.82882e+06	-3031.42	2775.12	187152	7.82882e+06	-3037.75	2784.02	2779.57	8.90698	10.852	39.3781	0.687277	14.0392
	13250	187180	7.82895e+06	-3030.04	2773.18	187173	7.82895e+06	-3034.34	2779.22	2776.2	6.04582	7.51288	38.8246	0.677617	9.64341
	13375	187234	7.82907e+06	-3028.21	2770.61	187221	7.82907e+06	-3034.31	2779.18	2774.89	8.57402	12.2139	35.0683	0.612058	14.9229
	13500	187360	7.82917e+06	-3027	2768.91	187355	7.82918e+06	-3029.22	2772.02	2770.47	3.11717	5.728	28.5549	0.498378	6.52125
	13625	187421	7.82929e+06	-3022.19	2762.16	187414	7.82929e+06	-3025.33	2766.56	2764.36	4.40268	7.56376	30.2027	0.527136	8.7518
	13750	187487	7.82941e+06	-3019.55	2758.46	187473	7.82941e+06	-3023.3	2763.72	2761.09	5.25396	14.0286	20.5319	0.358349	14.9801
	13875	187499	7.82953e+06	-3019.49	2758.38	187490	7829536	-3024.33	2765.16	2761.77	6.78219	9.41934	35.7549	0.624041	11.607
	14000	187532	7.82966e+06	-3017.38	2755.43	187524	7.82966e+06	-3020.29	2759.5	2757.46	4.07361	7.85649	27.4068	0.478339	8.84979
	14125	187536	7.82978e+06	-3016.53	2754.24	187530	7.82978e+06	-3018.5	2756.99	2755.62	2.75654	6.67692	22.4331	0.391531	7.22356
	14250	187549	7.82991e+06	-3013.51	2750.01	187542	7.82991e+06	-3017.84	2756.07	2753.04	6.05512	7.40382	39.2776	0.685524	9.56457
	14375	187518	7.83004e+06	-3011.7	2747.49	187508	7.83004e+06	-3016.5	2754.19	2750.84	6.7089	10.2269	33.2652	0.580587	12.231
	14500	187533	7.83016e+06	-3008.88	2743.55	187525	7.83016e+06	-3014.53	2751.44	2747.49	7.89071	8.53251	42.7621	0.74634	11.6218
	14625	187517	7.83029e+06	-3008.96	2743.66	187512	7.83029e+06	-3013.03	2749.34	2746.5	5.68278	5.70817	44.8723	0.783169	8.05464
	14750	187503	7.83042e+06	-3007.15	2741.14	187494	7.83042e+06	-3014.72	2751.71	2746.42	10.5695	9.5905	47.7801	0.833921	14.2721
	14875	187546	7.83054e+06	-3005.26	2738.5	187534	7.83054e+06	-3013.77	2750.38	2744.44	11.8764	12.173	44.2934	0.773066	17.0068
	15000	187552	7.83066e+06	-3004.59	2737.57	187540	7.83066e+06	-3013.01	2749.32	2743.44	11.748	12.0428	44.2901	0.773009	16.8239
	15125	187576	7.83079e+06	-3003.97	2736.7	187567	7.83079e+06	-3010.62	2745.98	2741.34	9.27382	8.98649	45.9015	0.801132	12.9136
	15250	187652	7.8309e+06	-3000.51	2731.89	187642	7.8309e+06	-3007.56	2741.71	2736.8	9.82107	10.1462	44.0671	0.769115	14.1209
	15375	187754	7.83101e+06	-2998.89	2729.63	187748	7.83102e+06	-3002.93	2735.26	2732.44	5.62216	6.47472	40.9686	0.715037	8.575
	15500	187802	7.83113e+06	-2998.24	2728.73	187796	7.83113e+06	-3000.47	2731.83	2730.28	3.10173	6.23286	26.4568	0.461759	6.96198
	15625	187812	7.83126e+06	-2996.62	2726.48	187806	7.83126e+06	-3000.07	2731.27	2728.88	4.79703	6.11128	38.1301	0.665495	7.76912
	15750	187718	7.8314e+06	-2997.67	2727.94	187710	7.8314e+06	-3002.71	2734.95	2731.44	7.01211	7.29085	43.8836	0.765913	10.1156
	15875	187689	7.83153e+06	-2995.47	2724.88	187682	7831528	-2999.37	2730.3	2727.59	5.42107	6.858	38.3255	0.668906	8.74186
	16000	187674	7.83166e+06	-2992.76	2721.12	187670	7.83166e+06	-2995.79	2725.32	2723.22	4.20738	4.27552	44.5397	0.777365	5.99851
	16125	187789	7.83177e+06	-2987.65	2714.03	187781	7.83177e+06	-2992.7	2721.03	2717.53	7.00277	7.97678	41.2797	0.720467	10.6145
	16250	187836	7.83189e+06	-2988.27	2714.89	187827	7.83189e+06	-2993.95	2722.77	2718.83	7.87883	8.34022	43.3705	0.756958	11.4732
	16375	187850	7.83201e+06	-2986.25	2712.09	187845	7.83201e+06	-2989.48	2716.57	2714.33	4.47557	4.73942	43.3599	0.756773	6.51865
	16500	187876	7.83213e+06	-2985.02	2710.39	187871	7.83213e+06	-2988	2714.52	2712.45	4.12731	4.78038	40.8069	0.712214	6.31559
	16625	187918	7.83225e+06	-2984.7	2709.95	187914	7.83225e+06	-2987.78	2714.21	2712.08	4.26543	4.16515	45.6814	0.797292	5.96174
	16750	187887	7.83238e+06	-2984.58	2709.78	187883	7.83238e+06	-2985	2710.36	2710.07	0.581369	4.23586	7.81498	0.136397	4.27557
	16875	187944	7.8325e+06	-2982.02	2706.24	187940	7.8325e+06	-2984.01	2708.99	2707.61	2.75296	3.97417	34.7109	0.605819	4.83454
	17000	187974	7.83262e+06	-2981.44	2705.44	187970	7.83262e+06	-2984.58	2709.78	2707.61	4.34386	4.78038	42.261	0.737593	6.45919
	17125	188015	7.83275e+06	-2982.44	2706.82	188015	7.83275e+06	-2982.44	2706.82	2706.82	0	0	0	0	0
	17250	188080	7.83286e+06	-2979.26	2702.42	188072	7.83286e+06	-2983.02	2707.62	2705.02	5.19833	8.35014	31.9041	0.556831	9.83603
	17375	188091	7.83299e+06	-2976.79	2699.01	188081	7.83299e+06	-2983.28	2707.98	2703.5	8.96935	9.49005	43.3842	0.757198	13.058
	17500	188093	7.83311e+06	-2973.9	2695.02	188077	7.83312e+06	-2984.3	2709.39	2702.21	14.3686	15.9859	41.9501	0.732168	21.4943
	17625	188122	7.83324e+06	-2974.11	2695.31	188117	7.83324e+06	-2983.17	2707.83	2701.57	12.5153	4.94162	68.4537	1.19474	13.4556
	17750	188190	7.83335e+06	-2973.47	2694.43	188173	7.83335e+06	-2983.39	2708.13	2701.28	13.7024	17.4483	38.143	0.665721	22.1855
	17875	188134	7.83349e+06	-2975.61	2697.38	188124	7.83349e+06	-2983.23	2707.91	2702.65	10.5289	10.0048	46.462	0.810915	14.5242
	18000	188147	7.83361e+06	-2974.87	2696.36	188137	7.83361e+06	-2983.88	2708.81	2702.59	12.4493	10.6399	49.481	0.863606	16.3766
	18125	188244	7.83372e+06	-2974.93	2696.44	188235	7.83372e+06	-2982.38	2706.74	2701.59	10.2914	8.80412	49.4535	0.863126	13.5434
	18250	188152	7.83386e+06	-2977.44	2699.91	188139	7.83386e+06	-2986.87	2712.95	2706.43	13.0417	13.2931	44.4531	0.775854	18.6223
	18375	188167	7.83399e+06	-2978	2700.68	188157	7.83399e+06	-2986.1	2711.88	2706.28	11.2019	10.1462	47.831	0.834809	15.1139
	18500	188103	7.83412e+06	-2977.81	2700.42	188097	7.83412e+06	-2982.25	2706.56	2703.49	6.13619	6.33331	44.0943	0.769591	8.81837
	18625	188104	7.83425e+06	-2979.4	2702.62	188098	7.83425e+06	-2986.41	2712.31	2707.46	9.69725	6.42515	56.4726	0.985633	11.6327
	18750	188165	7.83436e+06	-2975.01	2696.55	188149	7.83437e+06	-2987.09	2713.26	2704.91	16.7005	16.7214	44.9642	0.784773	23.6329
	18875	188185	7.83449e+06	-2977.69	2700.25	188175	7.83449e+06	-2985.19	2710.62	2705.44	10.37	9.76296	46.7272	0.815543	14.2426
	19000	188211	7.83461e+06	-2978.87	2701.88	188199	7.83461e+06	-2985.59	2711.18	2706.53	9.294	11.4362	39.1002	0.682428	14.7365
HF	750	184811	7.81665e+06	-3070.88	2830.94	184772	7.81665e+06	-3114.08	2892.88	2861.91	61.9368	39.786	57.2847	0.999807	73.6145
	875	184844	7.81677e+06	-3073.54	2834.73	184801	7.81678e+06	-3116.15	2895.87	2865.3	61.1373	42.9031	54.9407	0.958897	74.689
	1000	184874	7.81689e+06	-3075.28	2837.21	184835	7.8169e+06	-3113.62	2892.21	2864.71	55.0037	38.7776	54.8161	0.956722	67.2986
	1125	184860	7.81702e+06	-3076.13	2838.42	184824	7.81703e+06	-3112.91	2891.19	2864.81	52.7668	36.4185	55.3874	0.966693	64.1143
	1250	184880	7.81714e+06	-3075.64	2837.72	184842	7.81715e+06	-3114.29	2893.18	2865.45	55.4576	38.0818	55.5233	0.969064	67.2738
	1375	184881	7.81727e+06	-3072.71	2833.55	184841	7.81728e+06	-3110.61	2887.87	2860.71	54.3238	40.9048	53.0209	0.92539	68.0021
	1500	184836	7.8174e+06	-3079.22	2842.83	184808	7.81741e+06	-3113.15	2891.54	2867.18	48.704	28.521	59.6468	1.04103	56.4405
	1625	184857	7.81753e+06	-3080.76	2845.03	184827	7.81753e+06	-3120.05	2901.5	2873.27	56.4741	30.0429	61.9881	1.0819	63.968
	1750	184861	7.81765e+06	-3084.12	2849.83	184831	7.81766e+06	-3122.89	2905.61	2877.72	55.782	30.0739	61.6694	1.07633	63.3725
	1875	184884	7.81777e+06	-3092.62	2862	184854	7.81778e+06	-3128.65	2913.96	2887.98	51.9578	29.7515	60.2042	1.05076	59.8729
	2000	184872	7.8179e+06	-3092.7	2862.12	184845	7.81791e+06	-3129.44	2915.11	2888.61	52.989	27.8748	62.2535	1.08653	59.8735
	2125	184874	7.81803e+06	-3096.06	2866.94	184853	7.81803e+06	-3124.04	2907.28	2887.11	40.3416	21.4919	61.9537	1.0813	45.7093
	2250	184896	7.81815e+06	-3093.89	2863.82	184868	7.81815e+06	-3121.97	2904.28	2884.05	40.4584	28.1985	55.1244	0.962103	49.3157
	2375	184894	7.81828e+06	-3096.08	2866.97	184876	7.81828e+06	-3117.47	2897.77	2882.37	30.8079	18.2135	59.4086	1.03687	35.7891
	2500	184855	7.81841e+06	-3103.39	2877.47	184839	7.81841e+06	-3118.92	2899.87	2888.67	22.3991	15.8643	54.6917	0.954549	27.448
	2625	184898	7.81853e+06	-3107.42	2883.27	184886	7.81853e+06	-3118.26	2898.92	2891.09	15.643	11.9609	52.598	0.918009	19.6918
	2750	185037	7.81864e+06	-3109.42	2886.16	185031	7.81864e+06	-3114.37	2893.3	2889.73	7.14111	6.18328	49.1117	0.85716	9.44608
	2875	185045	7.81876e+06	-3114.55	2893.56	185039	7.81876e+06	-3119.11	2900.15	2896.85	6.58883	5.73792	48.9488	0.854318	8.73707
	3000	185057	7.81889e+06	-3118.11	2898.7	185052	7.81889e+06	-3121.78	2904.01	2901.35	5.30811	4.67863	48.6066	0.848346	7.0757
	3125	185100	7.81901e+06	-3119.5	2900.71	185095	7.81901e+06	-3125.06	2908.76	2904.73	8.04768	4.18499	62.5245	1.09126	9.07079
	3250	185141	7.81913e+06	-3117.8	2898.25	185127	7.81913e+06	-3131.14	2917.57	2907.91	19.3221	14.5731	52.9757	0.9246	24.2016
	3375	185168	7.81925e+06	-3118.91	2899.86	185143	7.81925e+06	-3140.21	2930.76	2915.31	30.9014	24.981	51.0476	0.890949	39.736
	3500	185183	7.81937e+06	-3122.75	2905.41	185157	7.81938e+06	-3141.14	2932.11	2918.76	26.6998	26.524	45.1893	0.788702	37.6352
	3625	185234	7.81949e+06	-3121.53	2903.65	185206	7.8195e+06	-3145.1	2937.88	2920.76	34.2354	28.299	50.4228	0.880044	44.4173
	3750	185269	7.81961e+06	-3121.53	2903.65	185244	7.81962e+06	-3141.48	2932.61	2918.13	28.9607	25.0728	49.1155	0.857227	38.3063
	3875	185273	7.81974e+06	-3123.41	2906.37	185251	7.81974e+06	-3142.31	2933.82	2920.09	27.4482	22.1058	51.1533	0.892794	35.243
	4000	185288	7.81986e+06	-3124.86	2908.47	185261	7.81987e+06	-3147.51	2941.4	2924.93	32.9289	26.6456	51.0207	0.89048	42.3592
	4125	185318	7.81999e+06	-3129.16	2914.7	185287	7.81999e+06	-3154.18	2951.14	2932.92	36.4376	30.4076	50.1546	0.875362	47.4586
	4250	185359	7.82011e+06	-3132.35	2919.33	185325	7.82011e+06	-3160.59	2960.52	2939.92	41.1893	34.3607	50.1647	0.875539	53.6397
	4375	185378	7.82023e+06	-3138.93	2928.89	185349	7.82023e+06	-3160.58	2960.5	2944.7	31.6102	28.9453	47.5199	0.829378	42.8606
	4500	185414	7.82035e+06	-3141.3	2932.34	185384	7.82036e+06	-3162.25	2962.95	2947.65	30.6076	29.8222	45.7447	0.798395	42.7339
	4625	185414	7.82048e+06	-3140.23	2930.79	185392	7.82048e+06	-3157.49	2955.98	2943.38	25.1935	22.0053	48.8643	0.852842	33.4506
	4750	185447	7.8206e+06	-3138.53	2928.31	185422	7.8206e+06	-3156.11	2953.96	2941.14	25.6481	25.0914	45.6286	0.79637	35.8804
	4875	185493	7.82072e+06	-3137.91	2927.41	185475	7.82072e+06	-3149.53	2944.34	2935.88	16.9336	18.3959	42.6298	0.744031	25.0031
	5000	185489	7.82085e+06	-3136.25	2925	185480	7.82085e+06	-3141.67	2932.88	2928.94	7.8866	8.84378	41.7256	0.728248	11.8495
	5125	185478	7.82097e+06	-3131.99	2918.81	185472	7.82098e+06	-3134.08	2921.84	2920.33	3.03545	6.42515	25.2876	0.441352	7.10609
	5250	185521	7.82109e+06	-3131.74	2918.44	185521	7.82109e+06	-3131.74	2918.44	2918.44	0	0	0	0	0
	5375	185518	7.82122e+06	-3133.18	2920.54	185511	7.82122e+06	-3137.7	2927.11	2923.82	6.5697	7.87633	39.8317	0.695195	10.2566
	5500	185537	7.82134e+06	-3140.05	2930.52	185530	7.82135e+06	-3144.08	2936.39	2933.46	5.86978	6.56526	41.7988	0.729527	8.80664
	5625	185557	7.82147e+06	-3147.32	2941.12	185546	7.82147e+06	-3153.39	2949.98	2945.55	8.86421	10.4476	40.3128	0.703591	13.7013
	5750	185567	7.82159e+06	-3150.45	2945.69	185561	7.82159e+06	-3154.2	2951.17	2948.43	5.47964	6.71789	39.2034	0.684228	8.66928
	5875	185563	7.82172e+06	-3150.04	2945.09	185550	7.82172e+06	-3158.02	2956.76	2950.92	11.6669	12.9494	42.0176	0.733345	17.43
	6000	185610	7.82184e+06	-3149.2	2943.86	185600	7.82184e+06	-3154.98	2952.31	2948.09	8.44533	10.1152	39.859	0.695671	13.1773
	6125	185566	7.82197e+06	-3149.38	2944.13	185557	7.82197e+06	-3156.24	2954.15	2949.14	10.0256	9.26931	47.2447	0.824575	13.6541
	6250	185617	7.82209e+06	-3146.08	2939.31	185599	7.82209e+06	-3159.37	2958.73	2949.02	19.4223	18.1428	46.9507	0.819444	26.578
	6375	185620	7.82222e+06	-3142.74	2934.44	185606	7.82222e+06	-3154.19	2951.15	2942.8	16.7108	14.2916	49.4621	0.863276	21.9887
	6500	185649	7.82234e+06	-3140.8	2931.62	185637	7.82234e+06	-3151.35	2947	2939.31	15.3857	12.0824	51.8574	0.905083	19.5629
	6625	185655	7.82246e+06	-3136.24	2924.98	185644	7.82247e+06	-3148.57	2942.94	2933.96	17.9608	10.9624	58.6023	1.0228	21.042
	6750	185656	7.82259e+06	-3131.58	2918.21	185634	7.82259e+06	-3150.79	2946.18	2932.2	27.972	22.6814	50.9628	0.889469	36.0122
	6875	185637	7.82272e+06	-3127.37	2912.1	185614	7.82272e+06	-3146.16	2939.43	2925.77	27.3222	24.0235	48.676	0.849556	36.3817
	7000	185699	7.82284e+06	-3123.94	2907.13	185671	7.82284e+06	-3142.49	2934.08	2920.61	26.943	28.33	43.5625	0.760309	39.0962
	7125	185691	7.82296e+06	-3121.68	2903.86	185661	7.82297e+06	-3145.79	2938.89	2921.38	35.0244	30.3667	49.0742	0.856506	46.3556
	7250	185724	7.82309e+06	-3120.51	2902.17	185693	7.82309e+06	-3143.62	2935.72	2918.95	33.5539	31.1828	47.0976	0.822009	45.8065
	7375	185771	7.82321e+06	-3119.92	2901.32	185741	7.82321e+06	-3142.48	2934.06	2917.69	32.7464	30.3059	47.2166	0.824085	44.6181
	7500	185828	7.82332e+06	-3119.68	2900.97	185798	7.82333e+06	-3140.65	2931.4	2916.18	30.4285	29.5096	45.8783	0.800728	42.3876
	7625	185893	7.82344e+06	-3119.26	2900.36	185859	7.82345e+06	-3142.6	2934.24	2917.3	33.8757	34.6025	44.3919	0.774784	48.4242
	7750	185930	7.82356e+06	-3116.4	2896.23	185885	7.82357e+06	-3146.53	2939.97	2918.1	43.7381	45.333	43.9742	0.767495	62.9929
	7875	185976	7.82368e+06	-3114.28	2893.17	185936	7.82369e+06	-3145.77	2938.86	2916.01	45.6915	40.9557	48.1285	0.84	61.3603
	8000	186046	7.8238e+06	-3112.33	2890.35	186004	7.82381e+06	-3146.82	2940.39	2915.37	50.0373	41.6727	50.2114	0.876354	65.1179
	8125	186079	7.82392e+06	-3111.81	2889.6	186046	7.82393e+06	-3138.57	2928.37	2908.99	38.7689	33.6351	49.0557	0.856184	51.3259
	8250	186115	7.82404e+06	-3112.65	2890.81	186086	7.82405e+06	-3136.53	2925.4	2908.11	34.5898	28.7331	50.2842	0.877625	44.9672
	8375	186125	7.82417e+06	-3111.15	2888.65	186092	7.82417e+06	-3137.7	2927.11	2907.88	38.4553	33.5122	48.9292	0.853975	51.0086
	8500	186152	7.82429e+06	-3106.96	2882.61	186112	7.8243e+06	-3137.83	2927.29	2904.95	44.6836	40.2202	48.0093	0.83792	60.1189
	8625	186178	7.82441e+06	-3103.57	2877.73	186135	7.82442e+06	-3134.6	2922.6	2900.16	44.868	44.012	45.5518	0.795029	62.8505
	8750	186225	7.82453e+06	-3105.91	2881.1	186193	7.82454e+06	-3127.28	2911.97	2896.54	30.8756	31.6877	44.2563	0.772419	44.2426
	8875	186233	7.82466e+06	-3103.95	2878.28	186202	7.82466e+06	-3127.75	2912.66	2895.47	34.3783	30.4473	48.4702	0.845964	45.9228
	9000	186290	7.82478e+06	-3099.67	2872.12	186260	7.82478e+06	-3120.91	2902.75	2887.44	30.6262	30.6086	45.0165	0.785686	43.2995
	9125	186318	7.8249e+06	-3095.72	2866.45	186291	7.8249e+06	-3115.67	2895.17	2880.81	28.724	26.9483	46.8269	0.817284	39.3862
	9250	186340	7.82502e+06	-3091.03	2859.72	186313	7.82503e+06	-3112.34	2890.37	2875.05	30.6428	26.8465	48.7781	0.851338	40.7396
	9375	186389	7.82514e+06	-3090.92	2859.57	186373	7.82514e+06	-3102.89	2876.75	2868.16	17.186	16.2476	46.6078	0.813459	23.6504
	9500	186411	7.82526e+06	-3086.91	2853.82	186398	7.82527e+06	-3096.27	2867.24	2860.53	13.4158	12.364	47.3365	0.826177	18.2442
	9625	186457	7.82538e+06	-3084.37	2850.19	186442	7.82539e+06	-3096.1	2867	2858.59	16.8055	15.0469	48.1601	0.840552	22.5573
	9750	186557	7.8255e+06	-3082.17	2847.04	186542	7.8255e+06	-3090.96	2859.62	2853.33	12.5785	14.552	40.8397	0.712788	19.2348
	9875	186578	7.82562e+06	-3079.36	2843.03	186570	7.82562e+06	-3084.83	2850.85	2846.94	7.81635	8.33031	43.1769	0.753578	11.4232
	10000	186593	7.82575e+06	-3077.74	2840.72	186577	7.82575e+06	-3082.75	2847.87	2844.3	7.15477	16.0566	24.0176	0.419186	17.5785
	10125	186599	7.82587e+06	-3077.03	2839.71	186591	7.82587e+06	-3080.52	2844.69	2842.2	4.9817	8.41093	30.6378	0.534731	9.77553
	10250	186615	7.82599e+06	-3073.92	2835.27	186604	7.826e+06	-3080.68	2844.92	2840.09	9.64479	11.6285	39.6727	0.69242	15.1077
	10375	186650	7.82612e+06	-3075.64	2837.72	186641	7.82612e+06	-3081.48	2846.06	2841.89	8.33557	9.37968	41.627	0.726528	12.5483
	10500	186681	7.82624e+06	-3078.2	2841.38	186671	7.82624e+06	-3083.3	2848.66	2845.02	7.28448	9.85349	36.4748	0.636605	12.2538
	10625	186738	7.82636e+06	-3080.75	2845.02	186722	7.82636e+06	-3086.09	2852.65	2848.83	7.63384	16.3183	25.0706	0.437564	18.0156
	10750	186744	7.82648e+06	-3080	2843.95	186730	7.82648e+06	-3088.05	2855.46	2849.7	11.5102	13.9083	39.6104	0.691332	18.0534
	10875	186717	7.82661e+06	-3081.05	2845.44	186705	7.82661e+06	-3088.5	2856.1	2850.77	10.6548	12.2238	41.0768	0.716926	16.2157
	11000	186691	7.82674e+06	-3082.66	2847.75	186680	7.82674e+06	-3088.13	2855.57	2851.66	7.82465	11.1038	35.1717	0.613863	13.5838
	11125	186722	7.82686e+06	-3082.3	2847.23	186713	7.82686e+06	-3088.34	2855.87	2851.55	8.63981	9.3288	42.8041	0.747072	12.7151
	11250	186821	7.82698e+06	-3079.73	2843.56	186809	7.82698e+06	-3087.65	2854.88	2849.22	11.3231	12.617	41.9062	0.731401	16.9529
	11375	186836	7.8271e+06	-3079.84	2843.72	186818	7.8271e+06	-3086.18	2852.78	2848.25	9.0622	18.7184	25.8332	0.450874	20.7967
	11500	186852	7.82722e+06	-3078.81	2842.25	186844	7.82723e+06	-3082.98	2848.2	2845.22	5.95641	7.38268	38.8969	0.678879	9.48593
	11625	186883	7.82735e+06	-3076.01	2838.25	186871	7.82735e+06	-3082.17	2847.04	2842.65	8.79381	11.3965	37.6546	0.657197	14.3948
	11750	186806	7.82748e+06	-3078.79	2842.22	186790	7.82748e+06	-3084	2849.66	2845.94	7.44315	15.218	26.0633	0.45489	16.9408
	11875	186891	7.8276e+06	-3078.42	2841.69	186885	7.8276e+06	-3081.12	2845.54	2843.62	3.85528	6.93862	29.0577	0.507152	7.93773
	12000	186863	7.82773e+06	-3078.09	2841.22	186855	7.82773e+06	-3083.37	2848.76	2844.99	7.54153	8.61313	41.2049	0.719162	11.4482
	12125	186926	7.82784e+06	-3077.34	2840.15	186917	7.82785e+06	-3083.15	2848.45	2844.3	8.29725	8.67392	43.7285	0.763207	12.0034
	12250	186961	7.82797e+06	-3076.21	2838.54	186955	7.82797e+06	-3080.5	2844.66	2841.6	6.12281	6.2626	44.3533	0.774112	8.75837
	12375	186930	7.8281e+06	-3074.1	2835.53	186922	7.8281e+06	-3082.46	2847.46	2841.49	11.9313	8.03757	56.0338	0.977974	14.3861
	12500	186950	7.82822e+06	-3072.93	2833.86	186936	7.82822e+06	-3083.26	2848.6	2841.23	14.742	14.0596	46.3573	0.809088	20.3716
	12625	187001	7.82834e+06	-3073.99	2835.37	186988	7828341	-3084.77	2850.76	2843.07	15.3906	13.6763	48.3752	0.844307	20.5891
	12750	187069	7.82846e+06	-3075.75	2837.88	187056	7.82846e+06	-3085.72	2852.12	2845	14.2404	12.4248	48.8953	0.853383	18.8988
	12875	187098	7.82858e+06	-3078.17	2841.33	187083	7.82858e+06	-3086.76	2853.61	2847.47	12.2761	14.774	39.7242	0.693318	19.2087
	13000	187088	7.82871e+06	-3077.94	2841	187076	7.82871e+06	-3086.17	2852.76	2846.88	11.7601	12.5153	43.2181	0.754299	17.1736
	13125	187090	7.82883e+06	-3077.45	2840.31	187077	7.82883e+06	-3085.72	2852.12	2846.21	11.8155	13.262	41.6987	0.727779	17.7619
	13250	187103	7.82896e+06	-3074.73	2836.43	187092	7.82896e+06	-3079.25	2842.87	2839.65	6.44824	11.002	30.3744	0.530133	12.7524
	13375	187149	7.82908e+06	-3070.61	2830.56	187134	7.82908e+06	-3078.21	2841.39	2835.97	10.8332	15.1982	35.4809	0.619259	18.664
	13500	187259	7.82919e+06	-3070	2829.69	187259	7.82919e+06	-3070	2829.69	2829.69	0	0	0	0	0
	13625	187318	7.82931e+06	-3065.24	2822.92	187309	7.82931e+06	-3069.45	2828.91	2825.91	5.98732	10.0147	30.8732	0.538838	11.668
	13750	187385	7.82942e+06	-3064.49	2821.85	187380	7.82942e+06	-3066.25	2824.35	2823.1	2.50142	5.02224	26.4764	0.462101	5.6107
	13875	187414	7.82955e+06	-3063.56	2820.53	187409	7.82955e+06	-3065.18	2822.83	2821.68	2.3017	5.64738	22.1743	0.387014	6.09842
	14000	187450	7.82967e+06	-3060.79	2816.6	187443	7.82967e+06	-3064.87	2822.39	2819.5	5.79397	7.71508	36.9063	0.644136	9.64845
	14125	187456	7.82979e+06	-3060.03	2815.52	187450	7.82979e+06	-3063.19	2820.01	2817.76	4.48572	5.82846	37.5827	0.655942	7.35476
	14250	187473	7.82992e+06	-3058.61	2813.51	187469	7.82992e+06	-3061	2816.9	2815.2	3.39069	3.47922	44.2617	0.772512	4.85817
	14375	187449	7.83005e+06	-3056.6	2810.66	187441	7.83005e+06	-3061.69	2817.88	2814.27	7.21964	7.66551	43.2843	0.755453	10.5301
	14500	187469	7.83017e+06	-3053.08	2805.67	187464	7.83017e+06	-3057.03	2811.27	2808.47	5.59524	5.53701	45.2997	0.790629	7.8718
	14625	187459	7.8303e+06	-3051.36	2803.24	187449	7.8303e+06	-3058.17	2812.88	2808.06	9.64557	9.5198	45.376	0.791961	13.5523
	14750	187451	7.83042e+06	-3048.87	2799.71	187437	7.83043e+06	-3059.6	2814.91	2807.31	15.1952	13.6155	48.1383	0.840172	20.4029
	14875	187486	7.83055e+06	-3047.54	2797.83	187473	7.83055e+06	-3056.82	2810.97	2804.4	13.133	13.262	44.72	0.780511	18.6643
	15000	187497	7.83067e+06	-3044.91	2794.12	187485	7.83067e+06	-3053.34	2806.04	2800.08	11.9183	11.3965	46.282	0.807773	16.4902
	15125	187520	7.83079e+06	-3046.06	2795.74	187511	7.83079e+06	-3053.31	2806	2800.87	10.2518	9.21714	48.0422	0.838495	13.7861
	15250	187590	7.83091e+06	-3043.88	2792.67	187582	7.83091e+06	-3049.62	2800.78	2796.72	8.10889	8.2609	44.468	0.776112	11.5757
	15375	187687	7.83102e+06	-3041.01	2788.62	187678	7.83102e+06	-3046.34	2796.14	2792.38	7.52215	8.56225	41.3001	0.720823	11.3971
	15500	187732	7.83114e+06	-3039.46	2786.43	187724	7.83114e+06	-3044.5	2793.54	2789.99	7.10895	8.592	39.6041	0.691221	11.1517
	15625	187736	7.83127e+06	-3040.03	2787.24	187727	7.83127e+06	-3045.48	2794.92	2791.08	7.6892	9.65129	38.5444	0.672726	12.3398
	15750	187655	7.83141e+06	-3041.63	2789.49	187649	7.83141e+06	-3043.89	2792.68	2791.09	3.18855	5.43526	30.3977	0.530539	6.30151
	15875	187626	7.83154e+06	-3038.93	2785.69	187621	7.83154e+06	-3042.23	2790.34	2788.01	4.65254	5.89916	38.2621	0.6678	7.51307
	16000	187616	7.83166e+06	-3034.21	2779.04	187610	7.83166e+06	-3038.77	2785.46	2782.25	6.4204	6.42385	44.9846	0.78513	9.08225
	16125	187722	7.83177e+06	-3032.25	2776.28	187716	7.83178e+06	-3034.1	2778.88	2777.58	2.60195	5.3956	25.745	0.449335	5.99021
	16250	187774	7.83189e+06	-3029.29	2772.12	187770	7.83189e+06	-3031.68	2775.48	2773.8	3.35848	3.29815	45.5192	0.794461	4.70714
	16375	187792	7.83202e+06	-3026.96	2768.85	187786	7.83202e+06	-3029.41	2772.29	2770.57	3.4402	5.44648	32.2781	0.563358	6.44198
	16500	187812	7.83214e+06	-3027.4	2769.47	187805	7.83214e+06	-3029.25	2772.07	2770.77	2.59782	7.07011	20.1752	0.352124	7.53228
	16625	187844	7.83226e+06	-3027.25	2769.26	187843	7.83226e+06	-3028.91	2771.59	2770.42	2.33083	1.50336	57.1784	0.997951	2.7736
	16750	187816	7.83239e+06	-3023.27	2763.68	187809	7.83239e+06	-3026.96	2768.85	2766.26	5.17615	6.91879	36.8013	0.642303	8.64073
	16875	187898	7.83251e+06	-3021.59	2761.32	187889	7.83251e+06	-3024.5	2765.4	2763.36	4.07924	9.17748	23.9644	0.418257	10.0432
	17000	187915	7.83263e+06	-3021.01	2760.51	187910	7.83263e+06	-3024.09	2764.83	2762.67	4.31684	4.68984	42.6285	0.744008	6.37415
	17125	187961	7.83275e+06	-3019.55	2758.46	187958	7.83275e+06	-3021.55	2761.26	2759.86	2.80131	3.63055	37.6535	0.657178	4.58565
	17250	188019	7.83287e+06	-3018.09	2756.42	188014	7.83287e+06	-3020.26	2759.46	2757.94	3.03805	4.92179	31.6856	0.553017	5.78392
	17375	188030	7.833e+06	-3018.28	2756.69	188028	7.833e+06	-3019.99	2759.08	2757.88	2.394	2.31948	45.9058	0.801207	3.33336
	17500	188028	7.83312e+06	-3016.71	2754.49	188019	7.83312e+06	-3022.78	2762.99	2758.74	8.49972	9.3288	42.3375	0.738928	12.6203
	17625	188076	7.83324e+06	-3014.49	2751.38	188067	7.83324e+06	-3022.49	2762.58	2756.98	11.1976	9.10677	50.8794	0.888013	14.4333
	17750	188116	7.83336e+06	-3016.13	2753.68	188106	7.83336e+06	-3021.54	2761.25	2757.46	7.57327	9.52109	38.4994	0.671942	12.1658
	17875	188084	7.83349e+06	-3014.26	2751.06	188073	7.83349e+06	-3023.16	2763.52	2757.29	12.4583	11.6582	46.9001	0.818562	17.0623
	18000	188096	7.83362e+06	-3018.73	2757.32	188087	7.83362e+06	-3025.99	2767.49	2762.4	10.1748	8.58339	49.8492	0.870033	13.3117
	18125	188186	7.83373e+06	-3014.83	2751.86	188176	7.83373e+06	-3021.86	2761.7	2756.78	9.83946	10.9934	41.8296	0.730064	14.7536
	18250	188102	7.83387e+06	-3016.73	2754.52	188092	7.83387e+06	-3023.48	2763.97	2759.24	9.45303	9.73191	44.1672	0.770863	13.5672
	18375	188116	7.83399e+06	-3019.9	2758.95	188109	7.83399e+06	-3025.74	2767.14	2763.05	8.18591	7.18048	48.7435	0.850735	10.8889
	18500	188067	7.83413e+06	-3017.66	2755.82	188063	7.83413e+06	-3020	2759.09	2757.46	3.27568	3.1964	45.7018	0.797646	4.5768
	18625	188068	7.83425e+06	-3018.54	2757.05	188069	7.83425e+06	-3020.5	2759.79	2758.42	2.74435	0.796304	73.8193	1.28839	2.85755
	18750	188107	7.83437e+06	-3017.72	2755.9	188100	7.83437e+06	-3022.78	2762.99	2759.45	7.08661	7.00932	45.3141	0.790881	9.96748
	18875	188135	7.83449e+06	-3016.3	2753.92	188125	7.8345e+06	-3024.14	2764.9	2759.41	10.9799	10.2057	47.0929	0.821926	14.9905
	19000	188143	7.83462e+06	-3018.68	2757.25	188131	7.83462e+06	-3025.76	2767.17	2762.21	9.92206	12.0415	39.4882	0.689199	15.6027
HE	750	184753	7.81666e+06	-3134.42	2922.34	184729	7.81666e+06	-3161.57	2961.96	2942.15	39.6185	25.0008	57.7465	1.00787	46.8473
	875	184782	7.81678e+06	-3135.64	2924.11	184750	7.81678e+06	-3167.22	2970.24	2947.18	46.1329	31.7993	55.4216	0.967289	56.0307
	1000	184807	7.8169e+06	-3141.75	2933	184783	7.8169e+06	-3165.88	2968.28	2950.64	35.2762	24.4662	55.2563	0.964404	42.9302
	1125	184795	7.81703e+06	-3142.78	2934.5	184775	7.81703e+06	-3162.79	2963.74	2949.12	29.2436	19.8174	55.8759	0.975218	35.3258
	1250	184816	7.81715e+06	-3140.87	2931.72	184793	7.81716e+06	-3166.05	2968.53	2950.12	36.8071	22.9642	58.0397	1.01298	43.3834
	1375	184804	7.81728e+06	-3144.65	2937.23	184780	7.81728e+06	-3167.13	2970.11	2953.67	32.8855	24.264	53.5788	0.935127	40.868
	1500	184774	7.81741e+06	-3154.05	2950.95	184760	7.81741e+06	-3170.32	2974.8	2962.87	23.8481	13.675	60.1691	1.05015	27.4907
	1625	184805	7.81753e+06	-3149.8	2944.74	184787	7.81753e+06	-3171.31	2976.25	2960.49	31.5126	17.4371	61.0426	1.06539	36.0152
	1750	184805	7.81766e+06	-3156.98	2955.23	184786	7.81766e+06	-3174.45	2980.87	2968.05	25.6354	18.9603	53.5129	0.933976	31.8852
	1875	184840	7.81778e+06	-3146.38	2939.75	184813	7.81778e+06	-3179.75	2988.67	2964.21	48.9263	27.5523	60.6145	1.05792	56.1507
	2000	184832	7.81791e+06	-3146.58	2940.04	184805	7.81791e+06	-3182.13	2992.18	2966.11	52.1436	26.978	62.6439	1.09334	58.7092
	2125	184837	7.81803e+06	-3145.53	2938.51	184811	7.81804e+06	-3179.31	2988.03	2963.27	49.5174	25.9498	62.3431	1.08809	55.9049
	2250	184844	7.81816e+06	-3146.4	2939.78	184811	7.81816e+06	-3179.27	2987.97	2963.87	48.1897	33.0199	55.5808	0.970068	58.4171
	2375	184852	7.81828e+06	-3146.41	2939.79	184824	7.81829e+06	-3178.92	2987.45	2963.62	47.6594	27.6838	59.8491	1.04456	55.1163
	2500	184801	7.81842e+06	-3153.37	2949.95	184779	7.81842e+06	-3178.88	2987.39	2968.67	37.438	22.9642	58.4754	1.02059	43.9199
	2625	184845	7.81854e+06	-3156.96	2955.2	184828	7.81854e+06	-3171.15	2976.02	2965.61	20.8115	17.215	50.4028	0.879695	27.0088
	2750	184972	7.81865e+06	-3161.73	2962.19	184964	7.81865e+06	-3168.23	2971.73	2966.96	9.53586	8.1294	49.5521	0.864848	12.5308
	2875	184990	7.81877e+06	-3163.5	2964.78	184973	7.81877e+06	-3172.54	2978.06	2971.42	13.2748	17.5078	37.1703	0.648743	21.9714
	3000	184994	7.81889e+06	-3167.66	2970.89	184988	7.8189e+06	-3171.88	2977.09	2973.99	6.20027	6.75625	42.5429	0.742513	9.17007
	3125	185046	7.81901e+06	-3169.45	2973.52	185035	7.81902e+06	-3179.61	2988.47	2980.99	14.9499	11.3866	52.7053	0.91988	18.7924
	3250	185083	7.81913e+06	-3171.15	2976.02	185069	7.81914e+06	-3184.57	2995.78	2985.9	19.7674	14.6537	53.4502	0.932881	24.6065
	3375	185105	7.81926e+06	-3173.07	2978.84	185086	7.81926e+06	-3189.01	3002.34	2990.59	23.5026	18.6887	51.5091	0.899004	30.0273
	3500	185117	7.81938e+06	-3169.23	2973.19	185098	7.81939e+06	-3191.11	3005.45	2989.32	32.252	19.4043	58.9669	1.02917	37.6393
	3625	185171	7.8195e+06	-3174.29	2980.63	185154	7.8195e+06	-3189.33	3002.81	2991.72	22.1809	18.0523	50.859	0.887657	28.5986
	3750	185205	7.81962e+06	-3172.4	2977.85	185185	7.81963e+06	-3188.41	3001.45	2989.65	23.6011	20.1299	49.5384	0.864608	31.0198
	3875	185214	7.81975e+06	-3174.13	2980.4	185179	7.81975e+06	-3202.24	3021.94	3001.17	41.5388	35.2984	49.6432	0.866437	54.511
	4000	185225	7.81987e+06	-3178.87	2987.38	185195	7.81988e+06	-3198.12	3015.83	3001.6	28.4489	29.7627	43.7071	0.762834	41.1723
	4125	185258	7.81999e+06	-3178.85	2987.35	185222	7.82e+06	-3208.31	3030.95	3009.15	43.6068	35.8032	50.6124	0.883353	56.4219
	4250	185291	7.82012e+06	-3188.47	3001.54	185252	7.82012e+06	-3221.11	3050.03	3025.78	48.4821	39.7365	50.6616	0.884211	62.6857
	4375	185304	7.82024e+06	-3194.57	3010.57	185267	7.82025e+06	-3222.08	3051.47	3031.02	40.9069	36.7905	48.0327	0.838328	55.0174
	4500	185324	7.82036e+06	-3205.01	3026.05	185291	7.82037e+06	-3228.51	3061.09	3043.57	35.0352	33.4514	46.3248	0.80852	48.4403
	4625	185349	7.82049e+06	-3191.59	3006.16	185306	7.82049e+06	-3225.6	3056.73	3031.44	50.5765	43.3558	49.3958	0.862119	66.6161
	4750	185367	7.82061e+06	-3194.99	3011.19	185340	7.82061e+06	-3213.71	3038.99	3025.09	27.8021	26.715	46.1424	0.805336	38.5571
	4875	185402	7.82073e+06	-3195.81	3012.4	185382	7.82073e+06	-3208.71	3031.55	3021.98	19.1461	20.4127	43.1661	0.75339	27.9867
	5000	185391	7.82086e+06	-3196.96	3014.11	185383	7.82086e+06	-3200.78	3019.77	3016.94	5.66367	7.63446	36.5701	0.638269	9.5059
	5125	185386	7.82099e+06	-3191.32	3005.76	185380	7.82099e+06	-3193.67	3009.23	3007.5	3.47731	6.7265	27.337	0.477121	7.57215
	5250	185418	7.82111e+06	-3185.89	2997.73	185415	7.82111e+06	-3187.91	3000.72	2999.22	2.98381	3.09595	43.9433	0.766955	4.29977
	5375	185422	7.82123e+06	-3189.05	3002.4	185416	7.82123e+06	-3193.2	3008.54	3005.47	6.13816	6.34453	44.0529	0.768868	8.8278
	5500	185442	7.82136e+06	-3198.47	3016.34	185440	7.82136e+06	-3201.03	3020.14	3018.24	3.79659	2.57126	55.8919	0.975498	4.58535
	5625	185469	7.82148e+06	-3202.54	3022.38	185447	7.82148e+06	-3210.95	3034.88	3028.63	12.4994	22.339	29.2284	0.510133	25.5982
	5750	185468	7.82161e+06	-3206.02	3027.55	185456	7.82161e+06	-3212.28	3036.86	3032.21	9.31089	12.999	35.6131	0.621566	15.9896
	5875	185480	7.82173e+06	-3201.82	3021.31	185460	7.82173e+06	-3214.32	3039.9	3030.61	18.5858	20.2614	42.5302	0.742292	27.4947
	6000	185522	7.82185e+06	-3200.33	3019.1	185501	7.82185e+06	-3212.49	3037.17	3028.14	18.071	21.2388	40.3928	0.704987	27.8863
	6125	185503	7.82198e+06	-3201.12	3020.28	185482	7.82198e+06	-3211.84	3036.21	3028.24	15.9314	21.2289	36.8867	0.643794	26.5419
	6250	185546	7.8221e+06	-3198.55	3016.46	185531	7.8221e+06	-3209.57	3032.83	3024.65	16.3649	15.1374	47.2315	0.824344	22.2924
	6375	185556	7.82222e+06	-3194.74	3010.82	185535	7.82223e+06	-3211.46	3035.64	3023.23	24.8222	20.8654	49.9497	0.871787	32.427
	6500	185588	7.82235e+06	-3193.8	3009.43	185576	7.82235e+06	-3204.99	3026.02	3017.72	16.5934	12.808	52.3364	0.913442	20.9616
	6625	185609	7.82247e+06	-3188.57	3001.69	185593	7.82247e+06	-3205.78	3027.19	3014.44	25.5028	15.8742	58.0997	1.01403	30.0397
	6750	185597	7.8226e+06	-3184.75	2996.05	185582	7.8226e+06	-3200.82	3019.83	3007.94	23.781	14.2903	58.9979	1.02971	27.7443
	6875	185573	7.82273e+06	-3179.95	2988.97	185556	7.82273e+06	-3196.69	3013.71	3001.34	24.7381	17.8316	54.2155	0.946238	30.4949
	7000	185615	7.82285e+06	-3179.75	2988.67	185586	7.82285e+06	-3198.87	3016.94	3002.81	28.264	29.2169	44.0503	0.768822	40.6507
	7125	185622	7.82297e+06	-3176.72	2984.21	185597	7.82298e+06	-3197.05	3014.24	2999.23	30.03	25.6061	49.5462	0.864745	39.4648
	7250	185654	7.82309e+06	-3172.72	2978.32	185622	7.8231e+06	-3196.57	3013.53	2995.93	35.2049	32.1912	47.5603	0.830084	47.7039
	7375	185703	7.82321e+06	-3170.83	2975.55	185673	7.82322e+06	-3193.33	3008.73	2992.14	33.1856	30.2352	47.6636	0.831886	44.8938
	7500	185756	7.82333e+06	-3170.91	2975.66	185731	7.82334e+06	-3189.65	3003.29	2989.48	27.6244	25.0517	47.7961	0.8342	37.2921
	7625	185819	7.82345e+06	-3169.75	2973.96	185770	7.82346e+06	-3198.64	3016.6	2995.28	42.6384	49.4373	40.7769	0.711692	65.2847
	7750	185854	7.82357e+06	-3167.7	2970.95	185802	7.82358e+06	-3202.03	3021.63	2996.29	50.6779	51.6464	44.4577	0.775933	72.3574
	7875	185909	7.82369e+06	-3166.82	2969.66	185870	7.8237e+06	-3197.2	3014.46	2992.06	44.807	39.4946	48.6058	0.848332	59.7285
	8000	185978	7.82381e+06	-3168.44	2972.03	185944	7.82381e+06	-3197.48	3014.88	2993.46	42.8433	35.0764	50.6924	0.884749	55.3706
	8125	186013	7.82393e+06	-3164.9	2966.84	185975	7.82393e+06	-3195.56	3012.03	2989.44	45.1949	38.5358	49.5472	0.864762	59.3934
	8250	186050	7.82405e+06	-3167.04	2969.98	186020	7.82406e+06	-3192.03	3006.81	2988.39	36.8289	30.0739	50.7655	0.886024	47.548
	8375	186057	7.82418e+06	-3165.92	2968.33	186018	7.82418e+06	-3197.15	3014.39	2991.36	46.0538	39.4127	49.4432	0.862947	60.6161
	8500	186078	7.8243e+06	-3164.51	2966.27	186037	7.82431e+06	-3196.4	3013.28	2989.77	47.0113	40.4918	49.261	0.859767	62.0455
	8625	186098	7.82442e+06	-3160.52	2960.42	186057	7.82443e+06	-3189.7	3003.36	2981.89	42.9446	41.4097	46.0424	0.803592	59.6573
	8750	186146	7.82454e+06	-3159.14	2958.4	186112	7.82455e+06	-3181.98	2991.96	2975.18	33.5661	34.4512	44.2545	0.772386	48.0996
	8875	186165	7.82467e+06	-3157.41	2955.86	186128	7.82467e+06	-3184.88	2996.24	2976.05	40.3779	37.0932	47.4278	0.827772	54.8295
	9000	186215	7.82479e+06	-3152.2	2948.24	186179	7.82479e+06	-3177.21	2984.93	2966.59	36.6879	36.055	45.4985	0.794098	51.439
	9125	186249	7.82491e+06	-3147.47	2941.34	186217	7.82491e+06	-3171.15	2976.02	2958.68	34.6781	31.9804	47.3175	0.825847	47.1733
	9250	186262	7.82503e+06	-3153.64	2950.35	186245	7.82503e+06	-3166.66	2969.42	2959.88	19.0721	16.3989	49.3099	0.86062	25.153
	9375	186312	7.82515e+06	-3148.06	2942.2	186291	7.82515e+06	-3163.92	2965.4	2953.8	23.2019	21.5414	47.1254	0.822493	31.6601
	9500	186335	7.82527e+06	-3144.73	2937.34	186313	7.82528e+06	-3161.11	2961.28	2949.31	23.9395	21.6221	47.9118	0.836219	32.2586
	9625	186378	7.8254e+06	-3146.32	2939.66	186361	7.8254e+06	-3162.1	2962.73	2951.2	23.072	17.4371	52.9192	0.923614	28.92
	9750	186466	7.82551e+06	-3137.44	2926.73	186429	7.82551e+06	-3160.2	2959.95	2943.34	33.2211	37.6886	41.395	0.722479	50.2401
	9875	186495	7.82563e+06	-3134.12	2921.9	186479	7.82563e+06	-3144.99	2937.72	2929.81	15.8198	16.5701	43.6731	0.762239	22.9093
	10000	186497	7.82576e+06	-3133.46	2920.94	186486	7.82576e+06	-3139.83	2930.2	2925.57	9.26216	11.043	39.9878	0.697919	14.413
	10125	186507	7.82588e+06	-3129.15	2914.69	186495	7.82588e+06	-3136.13	2924.82	2919.75	10.1363	12.395	39.2753	0.685483	16.0119
	10250	186523	7.82601e+06	-3127.75	2912.66	186510	7.82601e+06	-3135.67	2924.15	2918.4	11.4979	13.6341	40.1417	0.700605	17.8351
	10375	186563	7.82613e+06	-3129.6	2915.34	186552	7.82613e+06	-3136.42	2925.24	2920.29	9.90507	11.7302	40.178	0.701238	15.3528
	10500	186582	7.82625e+06	-3129.5	2915.19	186573	7.82625e+06	-3132.55	2919.62	2917.41	4.42691	9.88324	24.1286	0.421123	10.8294
	10625	186635	7.82637e+06	-3134.28	2922.13	186625	7.82637e+06	-3138.54	2928.33	2925.23	6.1937	10.176	31.3272	0.546762	11.9127
	10750	186660	7.82649e+06	-3131.55	2918.17	186637	7.8265e+06	-3145.84	2938.96	2928.56	20.7915	23.206	41.8589	0.730575	31.1578
	10875	186630	7.82662e+06	-3134.7	2922.74	186612	7.82663e+06	-3145.64	2938.67	2930.71	15.9248	17.9518	41.5757	0.725633	23.9973
	11000	186610	7.82675e+06	-3133.86	2921.52	186590	7.82675e+06	-3146.3	2939.63	2930.58	18.1078	19.857	42.3619	0.739355	26.8736
	11125	186641	7.82687e+06	-3135.08	2923.3	186619	7.82688e+06	-3149.43	2944.2	2933.75	20.9023	22.1877	43.2914	0.755577	30.4828
	11250	186743	7.82699e+06	-3129.17	2914.71	186720	7.82699e+06	-3144	2936.28	2925.5	21.5628	23.0138	43.1357	0.752861	31.5371
	11375	186740	7.82711e+06	-3129.22	2914.79	186728	7.82711e+06	-3135.41	2923.78	2919.28	8.98811	11.3258	38.4354	0.670824	14.4589
	11500	186768	7.82724e+06	-3126.42	2910.73	186758	7.82724e+06	-3132.02	2918.85	2914.79	8.12344	10.2566	38.38	0.669857	13.0839
	11625	186791	7.82736e+06	-3125.88	2909.94	186775	7.82736e+06	-3132.31	2919.27	2914.61	9.32708	16.3381	29.7211	0.518731	18.813
	11750	186724	7.82749e+06	-3132.75	2919.91	186717	7.82749e+06	-3137.62	2926.99	2923.45	7.07785	7.43226	43.6008	0.760978	10.2633
	11875	186796	7.82761e+06	-3132.09	2918.95	186796	7.82761e+06	-3132.09	2918.95	2918.95	0	0	0	0	0
	12000	186783	7.82774e+06	-3132.09	2918.95	186776	7.82774e+06	-3136.87	2925.9	2922.43	6.9455	7.08994	44.4104	0.775107	9.92508
	12125	186841	7.82786e+06	-3132.77	2919.94	186840	7.82786e+06	-3135.34	2923.67	2921.81	3.73379	1.15974	72.7448	1.26964	3.90976
	12250	186885	7.82798e+06	-3128.4	2913.6	186878	7.82798e+06	-3133.04	2920.33	2916.97	6.73405	6.75625	44.9057	0.783753	9.5391
	12375	186879	7.8281e+06	-3126.44	2910.76	186865	7.8281e+06	-3136.26	2925.01	2917.88	14.2547	14.3411	44.8267	0.782374	20.2204
	12500	186882	7.82823e+06	-3123.03	2905.82	186864	7.82823e+06	-3136.96	2926.03	2915.92	20.212	18.9404	46.8602	0.817865	27.6996
	12625	186932	7.82835e+06	-3128.78	2914.15	186924	7.82835e+06	-3135.81	2924.36	2919.25	10.2078	8.91449	48.8691	0.852927	13.5524
	12750	186994	7.82847e+06	-3126.93	2911.47	186976	7.82847e+06	-3138.86	2928.79	2920.13	17.326	18.0635	43.8061	0.764561	25.0296
	12875	187017	7.82859e+06	-3129.33	2914.95	186997	7.82859e+06	-3142.44	2934	2924.48	19.0577	20.6136	42.754	0.746198	28.0735
	13000	187001	7.82872e+06	-3135.61	2924.07	186984	7.82872e+06	-3146.22	2939.51	2931.79	15.4481	16.5701	42.993	0.75037	22.6541
	13125	187001	7.82884e+06	-3133.48	2920.97	186978	7.82885e+06	-3147.84	2941.88	2931.42	20.9064	23.0349	42.2267	0.736996	31.1076
	13250	187003	7.82897e+06	-3132.32	2919.29	186989	7.82897e+06	-3140.62	2931.35	2925.32	12.0678	14.5024	39.7646	0.694024	18.8666
	13375	187036	7.82909e+06	-3127.74	2912.64	187022	7.82909e+06	-3134.66	2922.69	2917.66	10.0446	13.8376	35.9755	0.627891	17.0989
	13500	187126	7.82921e+06	-3125.25	2909.03	187116	7.82921e+06	-3129.41	2915.06	2912.05	6.03094	10.0035	31.085	0.542536	11.6809
	13625	187169	7.82933e+06	-3128.94	2914.38	187164	7.82933e+06	-3131.09	2917.5	2915.94	3.11961	4.38719	35.4156	0.618119	5.38325
	13750	187269	7.82944e+06	-3118.53	2899.31	187252	7829441	-3126.23	2910.45	2904.88	11.1455	16.6507	33.7973	0.589873	20.0367
	13875	187315	7.82956e+06	-3114.78	2893.89	187302	7.82956e+06	-3121.62	2903.78	2898.83	9.88755	13.3228	36.581	0.63846	16.591
	14000	187346	7.82968e+06	-3116.33	2896.13	187339	7.82968e+06	-3120.42	2902.04	2899.08	5.91262	7.7263	37.4254	0.653196	9.72907
	14125	187357	7.82981e+06	-3114.42	2893.37	187349	7.82981e+06	-3118.51	2899.28	2896.32	5.90903	7.54263	38.0758	0.664547	9.58165
	14250	187380	7.82993e+06	-3113.13	2891.51	187374	7.82993e+06	-3116.82	2896.84	2894.17	5.3286	6.30227	40.2147	0.701879	8.25304
	14375	187366	7.83006e+06	-3111.68	2889.41	187362	7.83006e+06	-3114.64	2893.69	2891.55	4.27196	4.45789	43.7799	0.764103	6.17434
	14500	187395	7.83018e+06	-3106.47	2881.9	187390	7.83018e+06	-3110.43	2887.61	2884.76	5.70662	5.53701	45.8642	0.800482	7.95135
	14625	187384	7.83031e+06	-3105.18	2880.05	187374	7.83031e+06	-3112.39	2890.44	2885.24	10.3912	10.0656	45.9118	0.801312	14.467
	14750	187384	7.83043e+06	-3102.15	2875.69	187369	7.83043e+06	-3114.02	2892.79	2884.24	17.1035	15.0568	48.6413	0.848952	22.7867
	14875	187410	7.83056e+06	-3101.43	2874.65	187397	7.83056e+06	-3110.06	2887.08	2880.87	12.4257	12.3342	45.2116	0.789091	17.508
	15000	187425	7.83068e+06	-3098.36	2870.24	187411	7.83068e+06	-3108.55	2884.9	2877.57	14.6611	13.7768	46.781	0.816483	20.1183
	15125	187455	7.8308e+06	-3097.83	2869.48	187445	7.8308e+06	-3105.32	2880.25	2874.86	10.7699	9.49996	48.585	0.847968	14.3611
	15250	187517	7.83092e+06	-3095.31	2865.86	187501	7.83092e+06	-3106.53	2881.99	2873.93	16.1299	16.1571	44.9518	0.784557	22.8303
	15375	187608	7.83103e+06	-3090.61	2859.12	187592	7.83104e+06	-3100.29	2873.01	2866.07	13.8917	15.5405	41.7935	0.729434	20.8443
	15500	187645	7.83115e+06	-3091.26	2860.05	187633	7.83116e+06	-3098.23	2870.05	2865.05	10.0003	11.8802	40.0893	0.699691	15.5289
	15625	187647	7.83128e+06	-3090.92	2859.57	187632	7.83128e+06	-3096.02	2866.88	2863.22	7.31431	14.5929	26.6211	0.464626	16.3234
	15750	187584	7.83141e+06	-3090.67	2859.21	187570	7.83142e+06	-3100.43	2873.21	2866.21	14.0069	14.1389	44.7313	0.780708	19.9023
	15875	187558	7.83154e+06	-3088.12	2855.56	187548	7.83155e+06	-3095.34	2865.9	2860.73	10.349	10.0954	45.7108	0.797804	14.4574
	16000	187551	7.83167e+06	-3080.71	2844.96	187533	7.83167e+06	-3094.05	2864.05	2854.51	19.0946	18.8089	45.4318	0.792934	26.8026
	16125	187645	7.83178e+06	-3079.44	2843.15	187625	7.83179e+06	-3092.56	2861.92	2852.53	18.7714	20.7352	42.1542	0.735729	27.9699
	16250	187704	7.8319e+06	-3073.61	2834.83	187688	7.83191e+06	-3084.03	2849.7	2842.27	14.874	16.4584	42.1051	0.734872	22.1836
	16375	187717	7.83203e+06	-3079.36	2843.03	187705	7.83203e+06	-3085	2851.09	2847.06	8.05949	11.3767	35.3146	0.616356	13.9422
	16500	187742	7.83215e+06	-3073.9	2835.24	187732	7.83215e+06	-3080.77	2845.04	2840.14	9.80184	10.398	43.3095	0.755893	14.2897
	16625	187763	7.83227e+06	-3071.94	2832.45	187749	7.83228e+06	-3079.16	2842.75	2837.6	10.2953	13.5138	37.3014	0.651033	16.9887
	16750	187745	7.8324e+06	-3070.35	2830.19	187741	7.8324e+06	-3073.45	2834.6	2832.39	4.41521	4.04487	47.5065	0.829145	5.98791
	16875	187842	7.83252e+06	-3066.55	2824.78	187835	7.83252e+06	-3071.97	2832.49	2828.64	7.71292	6.858	48.3579	0.844004	10.3209
	17000	187852	7.83264e+06	-3062.35	2818.81	187830	7.83264e+06	-3077.32	2840.12	2829.47	21.307	22.8029	43.0576	0.751497	31.2084
	17125	187894	7.83276e+06	-3066.93	2825.32	187878	7.83276e+06	-3078.33	2841.56	2833.44	16.2404	16.2786	44.9326	0.784223	22.9945
	17250	187948	7.83288e+06	-3066.08	2824.11	187930	7.83288e+06	-3072.63	2833.43	2828.77	9.32125	18.4356	26.8217	0.468127	20.6581
	17375	187975	7.833e+06	-3060.67	2816.43	187953	7.83301e+06	-3068.65	2827.77	2822.1	11.339	21.9558	27.3141	0.476721	24.7109
	17500	187967	7.83313e+06	-3056.79	2810.93	187943	7.83313e+06	-3072.29	2832.95	2821.94	22.0236	23.8213	42.7545	0.746206	32.4421
	17625	188022	7.83325e+06	-3062.64	2819.22	188015	7.83325e+06	-3069	2828.27	2823.74	9.04052	7.4633	50.459	0.880676	11.7231
	17750	188023	7.83337e+06	-3070.23	2830.02	188015	7.83338e+06	-3073.82	2835.13	2832.57	5.1133	7.86641	33.0246	0.576388	9.38223
	17875	188016	7.8335e+06	-3066.54	2824.77	188016	7.8335e+06	-3066.54	2824.77	2824.77	0	0	0	0	0
	18000	188044	7.83362e+06	-3063.69	2820.72	188044	7.83362e+06	-3063.69	2820.72	2820.72	0	0	0	0	0
	18125	188108	7.83374e+06	-3066.64	2824.91	188108	7.83374e+06	-3066.64	2824.91	2824.91	0	0	0	0	0
	18250	188041	7.83388e+06	-3065.96	2823.94	188030	7.83388e+06	-3074.34	2835.87	2829.91	11.9286	10.5084	48.6218	0.848611	15.8971
	18375	188061	7.834e+06	-3065.15	2822.79	188050	7.834e+06	-3073.55	2834.74	2828.77	11.9539	10.3075	49.2299	0.859225	15.7842
	18500	188026	7.83413e+06	-3062.73	2819.35	188024	7.83413e+06	-3065.21	2822.88	2821.11	3.52313	1.77496	63.2609	1.10411	3.94499
	18625	188019	7.83426e+06	-3062.75	2819.38	188019	7.83426e+06	-3062.75	2819.38	2819.38	0	0	0	0	0
HD	750	184686	7.81667e+06	-3208.61	3031.4	184672	7.81667e+06	-3223.61	3053.76	3042.58	22.3584	13.8164	58.2859	1.01728	26.283
	875	184715	7.81679e+06	-3209.62	3032.9	184696	7.81679e+06	-3221.38	3050.43	3041.67	17.5257	18.4964	43.4565	0.758459	25.4807
	1000	184743	7.81691e+06	-3213.73	3039.02	184720	7.81691e+06	-3228.41	3060.94	3049.98	21.9149	23.1664	43.4099	0.757646	31.8896
	1125	184725	7.81704e+06	-3213.44	3038.59	184709	7.81704e+06	-3224.44	3055	3046.79	16.4105	16.5291	44.7937	0.781797	23.292
	1250	184743	7.81716e+06	-3215.08	3041.03	184732	7.81716e+06	-3226.69	3058.36	3049.7	17.3309	11.4461	56.5575	0.987115	20.7695
	1375	184728	7.81729e+06	-3216.06	3042.49	184709	7.81729e+06	-3233.25	3068.18	3055.34	25.6903	18.5572	54.1579	0.945233	31.6916
	1500	184717	7.81742e+06	-3222.25	3051.73	184698	7.81742e+06	-3244.45	3084.99	3068.36	33.2665	18.6576	60.714	1.05966	38.1414
	1625	184749	7.81754e+06	-3223.27	3053.25	184727	7.81754e+06	-3251.86	3096.15	3074.7	42.8972	21.8639	62.9929	1.09943	48.1477
	1750	184746	7.81767e+06	-3233.18	3068.08	184726	7.81767e+06	-3258.95	3106.84	3087.46	38.7667	19.9885	62.7239	1.09474	43.6165
	1875	184766	7.81779e+06	-3236.01	3072.32	184755	7.81779e+06	-3250.3	3093.8	3083.06	21.4778	11.7996	61.2162	1.06842	24.5057
	2000	184774	7.81791e+06	-3222.81	3052.56	184761	7.81792e+06	-3240.06	3078.4	3065.48	25.8337	13.0896	63.1294	1.10182	28.9606
	2125	184780	7.81804e+06	-3219.51	3047.64	184759	7.81804e+06	-3247.15	3089.06	3068.35	41.418	21.2289	62.8625	1.09716	46.5415
	2250	184772	7.81817e+06	-3218.41	3046	184755	7.81817e+06	-3235.53	3071.6	3058.8	25.6039	17.1952	56.1153	0.979396	30.8421
	2375	184791	7.81829e+06	-3218.01	3045.4	184780	7.81829e+06	-3227.02	3058.86	3052.13	13.4565	11.9311	48.4384	0.84541	17.9841
	2500	184742	7.81842e+06	-3215.49	3041.64	184739	7.81842e+06	-3218.18	3045.65	3043.65	4.01051	2.73381	55.7193	0.972485	4.85365
	2625	184786	7.81854e+06	-3209.94	3033.38	184780	7.81854e+06	-3214.58	3040.29	3036.83	6.908	5.8595	49.6947	0.867337	9.05837
	2750	184914	7.81865e+06	-3208.9	3031.83	184915	7.81865e+06	-3212.34	3036.95	3034.39	5.11885	0.957549	79.4045	1.38587	5.20764
	2875	184927	7.81878e+06	-3210.93	3034.85	184920	7.81878e+06	-3215.01	3040.93	3037.89	6.07561	7.81554	37.8606	0.660792	9.89927
	3000	184929	7.8189e+06	-3219.16	3047.12	184915	7.8189e+06	-3230.21	3063.63	3055.37	16.5143	14.0993	49.5106	0.864122	21.7143
	3125	184981	7.81902e+06	-3228.08	3060.44	184960	7.81902e+06	-3246.54	3088.14	3074.29	27.6957	20.7154	53.2048	0.928599	34.5858
	3250	185004	7.81915e+06	-3244.58	3085.19	184990	7.81915e+06	-3254.03	3099.42	3092.3	14.23	13.7259	46.0331	0.803429	19.7711
	3375	185019	7.81927e+06	-3246.84	3088.59	185011	7.81927e+06	-3254.28	3099.8	3094.19	11.2076	8.7235	52.1045	0.909394	14.2025
	3500	185038	7.81939e+06	-3244.26	3084.71	185027	7.81939e+06	-3251.09	3094.99	3089.85	10.2797	11.7897	41.0858	0.717082	15.6419
	3625	185104	7.81951e+06	-3238.25	3075.68	185081	7.81951e+06	-3250.39	3093.93	3084.81	18.2529	23.1552	38.2482	0.667557	29.4844
	3750	185125	7.81963e+06	-3236.65	3073.28	185108	7.81964e+06	-3250.22	3093.68	3083.48	20.3974	17.0538	50.1018	0.874441	26.5873
	3875	185136	7.81976e+06	-3241.43	3080.46	185120	7.81976e+06	-3255.17	3101.14	3090.8	20.6837	16.0764	52.1438	0.910081	26.1967
	4000	185141	7.81988e+06	-3250.63	3094.3	185133	7.81988e+06	-3256.16	3102.63	3098.46	8.33761	7.84529	46.7425	0.815811	11.4483
	4125	185166	7.82001e+06	-3255.15	3101.11	185158	7.82001e+06	-3260.91	3109.81	3105.46	8.69665	7.38268	49.6717	0.866935	11.4077
	4250	185219	7.82013e+06	-3248.36	3090.88	185191	7.82013e+06	-3271.28	3125.5	3108.19	34.6243	27.886	51.1525	0.892779	44.4575
	4375	185236	7.82025e+06	-3245.41	3086.44	185196	7.82025e+06	-3275.79	3132.34	3109.39	45.9047	40.6233	48.4928	0.84636	61.2984
	4500	185262	7.82037e+06	-3249.07	3091.95	185216	7.82038e+06	-3281.11	3140.42	3116.19	48.4791	45.6059	46.7492	0.815928	66.5592
	4625	185277	7.8205e+06	-3248.83	3091.58	185246	7.8205e+06	-3273.31	3128.58	3110.08	36.995	31.2126	49.8458	0.869973	48.403
	4750	185282	7.82062e+06	-3254.74	3100.49	185266	7.82062e+06	-3265.79	3117.19	3108.84	16.695	15.7837	46.6073	0.813451	22.975
	4875	185326	7.82074e+06	-3244.45	3084.99	185303	7.82075e+06	-3258.96	3106.86	3095.93	21.8655	22.9741	43.5838	0.76068	31.7161
	5000	185319	7.82087e+06	-3243.43	3083.46	185302	7.82087e+06	-3251.59	3095.74	3089.6	12.2808	16.8331	36.1131	0.630293	20.8367
	5125	185319	7.821e+06	-3235.15	3071.03	185312	7.821e+06	-3240.12	3078.49	3074.76	7.45728	7.08003	46.4865	0.811343	10.2829
	5250	185327	7.82112e+06	-3234.95	3070.73	185319	7.82112e+06	-3239.06	3076.9	3073.81	6.1657	8.98649	34.4543	0.601341	10.8983
	5375	185337	7.82124e+06	-3241.52	3080.59	185332	7.82125e+06	-3242.72	3082.39	3081.49	1.80303	4.57948	21.4905	0.37508	4.92164
	5500	185367	7.82137e+06	-3244.74	3085.43	185352	7.82137e+06	-3253.42	3098.5	3091.96	13.0697	15.7824	39.6287	0.691651	20.4915
	5625	185379	7.82149e+06	-3251.18	3095.12	185357	7.82149e+06	-3264.04	3114.54	3104.83	19.414	22.158	41.2237	0.719489	29.4598
	5750	185378	7.82162e+06	-3262.96	3112.9	185348	7.82162e+06	-3274.02	3129.66	3121.28	16.752	30.3059	28.9322	0.504962	34.6277
	5875	185370	7.82174e+06	-3269.79	3123.24	185359	7.82175e+06	-3276.6	3133.57	3128.41	10.3295	11.0529	43.0622	0.751578	15.1283
	6000	185401	7.82187e+06	-3270.25	3123.94	185386	7.82187e+06	-3278.74	3136.82	3130.38	12.8828	14.8149	41.0096	0.715752	19.6328
	6125	185414	7.82199e+06	-3264.37	3115.04	185390	7.82199e+06	-3280.27	3139.15	3127.09	24.1108	23.5484	45.6762	0.7972	33.7025
	6250	185468	7.82211e+06	-3256.47	3103.1	185444	7.82211e+06	-3274.06	3129.72	3116.41	26.6165	24.0235	47.9313	0.836559	35.8548
	6375	185486	7.82223e+06	-3255.22	3101.21	185463	7.82224e+06	-3270	3123.56	3112.39	22.3465	23.015	44.1556	0.770661	32.0789
	6500	185517	7.82236e+06	-3256.9	3103.75	185505	7.82236e+06	-3267.46	3119.71	3111.73	15.964	12.6468	51.6135	0.900826	20.3664
	6625	185546	7.82248e+06	-3261.56	3110.79	185531	7.82248e+06	-3272.69	3127.64	3119.21	16.851	15.4401	47.5019	0.829064	22.855
	6750	185538	7.82261e+06	-3249.42	3092.47	185525	7.82261e+06	-3259.99	3108.42	3100.44	15.9428	13.0611	50.674	0.884429	20.6098
	6875	185509	7.82274e+06	-3236.99	3073.79	185485	7.82274e+06	-3258.38	3105.98	3089.89	32.1936	24.0222	53.2705	0.929746	40.1683
	7000	185528	7.82286e+06	-3237.34	3074.32	185499	7.82286e+06	-3252.92	3097.75	3086.03	23.4308	28.753	39.1766	0.683761	37.0909
	7125	185542	7.82298e+06	-3241.13	3080	185531	7.82298e+06	-3249.91	3093.21	3086.61	13.2059	11.0529	50.0717	0.873916	17.221
	7250	185555	7.82311e+06	-3246.99	3088.81	185547	7.82311e+06	-3253.11	3098.03	3093.42	9.21774	7.45339	51.0413	0.890838	11.8541
	7375	185618	7.82323e+06	-3234.52	3070.09	185598	7.82323e+06	-3249.43	3092.49	3081.29	22.4016	20.0394	48.1857	0.840999	30.0568
	7500	185665	7.82335e+06	-3236.4	3072.91	185654	7.82335e+06	-3243.94	3084.23	3078.57	11.3222	10.62	46.833	0.81739	15.5235
	7625	185715	7.82346e+06	-3240.33	3078.8	185699	7.82347e+06	-3250.85	3094.63	3086.71	15.8233	15.6112	45.3865	0.792144	22.2281
	7750	185749	7.82359e+06	-3237.85	3075.08	185714	7.82359e+06	-3261.37	3110.5	3092.79	35.4203	35.379	45.0334	0.785981	50.0627
	7875	185820	7.8237e+06	-3235.74	3071.92	185787	7.82371e+06	-3260.94	3109.85	3090.88	37.9356	32.7668	49.1813	0.858375	50.1276
	8000	185901	7.82382e+06	-3232.87	3067.61	185864	7.82382e+06	-3263.1	3113.12	3090.36	45.5027	37.0721	50.8295	0.887143	58.6927
	8125	185928	7.82394e+06	-3233.13	3068	185895	7.82395e+06	-3259.66	3107.92	3087.96	39.914	33.3424	50.1262	0.874866	52.0081
	8250	185969	7.82406e+06	-3234.77	3070.46	185940	7.82407e+06	-3259.24	3107.28	3088.87	36.8216	29.4376	51.3589	0.896382	47.1424
	8375	185973	7.82419e+06	-3232.88	3067.63	185942	7.82419e+06	-3258.7	3106.47	3087.05	38.8387	31.1134	51.302	0.895389	49.7643
	8500	185992	7.82431e+06	-3232.58	3067.18	185956	7.82432e+06	-3256.39	3102.98	3085.08	35.8009	36.1456	44.7255	0.780608	50.8744
	8625	186005	7.82444e+06	-3228.79	3061.5	185967	7.82444e+06	-3254.08	3099.49	3080.5	37.9908	38.5556	44.5773	0.77802	54.1279
	8750	186051	7.82456e+06	-3225.11	3056	186013	7.82456e+06	-3250.09	3093.48	3074.74	37.4811	38.697	44.0855	0.769438	53.8729
	8875	186088	7.82468e+06	-3222.27	3051.76	186055	7.82468e+06	-3243.76	3083.96	3067.86	32.1992	32.6961	44.5613	0.777742	45.8893
	9000	186113	7.8248e+06	-3223.41	3053.46	186087	7.8248e+06	-3241.93	3081.21	3067.33	27.7462	26.6866	46.1153	0.804863	38.4971
	9125	186155	7.82492e+06	-3217.56	3044.73	186125	7.82492e+06	-3239.47	3077.51	3061.12	32.7832	29.5988	47.9222	0.8364	44.1682
	9250	186181	7.82504e+06	-3218.25	3045.76	186158	7.82505e+06	-3236.36	3072.85	3059.3	27.0873	22.8029	49.9083	0.871064	35.4076
	9375	186222	7.82516e+06	-3215.3	3041.36	186200	7.82517e+06	-3225.81	3057.05	3049.2	15.6873	21.8751	35.6454	0.62213	26.9186
	9500	186243	7.82529e+06	-3214.59	3040.3	186230	7.82529e+06	-3224.67	3055.34	3047.82	15.0412	13.3129	48.4881	0.846277	20.0866
	9625	186294	7.82541e+06	-3212.92	3037.81	186286	7.82541e+06	-3219.33	3047.37	3042.59	9.55455	7.83666	50.6413	0.883858	12.3573
	9750	186352	7.82552e+06	-3206.94	3028.92	186340	7.82553e+06	-3214.53	3040.21	3034.57	11.2946	12.5662	41.9496	0.732158	16.8961
	9875	186395	7.82564e+06	-3200.01	3018.63	186380	7.82565e+06	-3210.1	3033.62	3026.12	14.9885	15.3806	44.2603	0.772488	21.476
	10000	186397	7.82577e+06	-3191.53	3006.07	186365	7.82577e+06	-3210.05	3033.54	3019.81	27.4748	32.1317	40.5326	0.707428	42.2766
	10125	186399	7.8259e+06	-3190.74	3004.9	186369	7.8259e+06	-3207.57	3029.85	3017.38	24.955	29.9028	39.8462	0.695448	38.9478
	10250	186402	7.82602e+06	-3198.78	3016.8	186382	7.82602e+06	-3210.52	3034.24	3025.52	17.4373	20.2205	40.7732	0.711627	26.7007
	10375	186436	7.82614e+06	-3203.89	3024.39	186423	7.82615e+06	-3211.53	3035.74	3030.07	11.3584	13.1616	40.7941	0.711992	17.385
	10500	186437	7.82627e+06	-3205.33	3026.53	186422	7.82627e+06	-3213.09	3038.07	3032.3	11.5421	15.0072	37.5641	0.655617	18.9325
	10625	186498	7.82639e+06	-3205.84	3027.28	186484	7.82639e+06	-3213.35	3038.45	3032.87	11.1716	14.3213	37.9568	0.66247	18.1633
	10750	186536	7.82651e+06	-3208.87	3031.79	186530	7.82651e+06	-3212.74	3037.55	3034.67	5.75904	6.29365	42.4603	0.741071	8.53092
	10875	186510	7.82664e+06	-3208.48	3031.21	186499	7.82664e+06	-3215.22	3041.24	3036.22	10.0332	11.0529	42.2314	0.737077	14.9275
	11000	186492	7.82677e+06	-3207.86	3030.29	186478	7.82677e+06	-3216.67	3043.4	3036.84	13.1163	14.1204	42.8887	0.748549	19.2723
	11125	186529	7.82689e+06	-3207.96	3030.43	186520	7.82689e+06	-3214.15	3039.65	3035.04	9.2122	9.56075	43.9363	0.766833	13.2768
	11250	186617	7.827e+06	-3207.86	3030.29	186613	7.827e+06	-3211.91	3036.31	3033.3	6.02519	4.70967	51.9865	0.907336	7.64748
	11375	186603	7.82713e+06	-3207.57	3029.85	186587	7.82713e+06	-3213.35	3038.45	3034.15	8.60044	16.5899	27.4029	0.47827	18.6867
	11500	186626	7.82725e+06	-3204.7	3025.59	186606	7.82726e+06	-3215.64	3041.87	3033.73	16.2769	20.0394	39.085	0.682163	25.8169
	11625	186649	7.82738e+06	-3203.62	3023.99	186627	7.82738e+06	-3215.66	3041.9	3032.94	17.9106	22.2683	38.8099	0.677361	28.5774
	11750	186616	7.82751e+06	-3203.96	3024.49	186604	7.82751e+06	-3212	3036.44	3030.47	11.9541	12.2536	44.2911	0.773026	17.1187
	11875	186681	7.82762e+06	-3203.04	3023.12	186665	7.82763e+06	-3212.57	3037.29	3030.21	14.1687	16.2165	41.1443	0.718103	21.5343
	12000	186679	7.82775e+06	-3203.24	3023.42	186664	7.82775e+06	-3211.4	3035.55	3029.49	12.13	14.9663	39.0244	0.681105	19.2646
	12125	186741	7.82787e+06	-3201.85	3021.36	186727	7.82787e+06	-3211.31	3035.42	3028.39	14.0593	14.129	44.8582	0.782924	19.9322
	12250	186790	7.82799e+06	-3198.08	3015.77	186768	7.82799e+06	-3209.45	3032.65	3024.21	16.8832	22.4904	36.895	0.643939	28.1222
	12375	186778	7.82812e+06	-3196.04	3012.74	186756	7.82812e+06	-3211.37	3035.51	3024.13	22.7629	22.3985	45.4623	0.793466	31.935
	12500	186779	7.82824e+06	-3199.94	3018.52	186763	7.82824e+06	-3211.52	3035.73	3027.13	17.2055	15.7427	47.5419	0.829764	23.3208
	12625	186844	7.82836e+06	-3199.36	3017.66	186828	7.82836e+06	-3211.65	3035.92	3026.79	18.2591	15.5815	49.524	0.864358	24.0037
	12750	186883	7.82848e+06	-3200.78	3019.77	186860	7.82848e+06	-3216.22	3042.73	3031.25	22.9603	23.3884	44.4707	0.776161	32.7749
	12875	186897	7.8286e+06	-3206.09	3027.65	186881	7.82861e+06	-3216.4	3043	3035.33	15.3446	16.2165	43.4176	0.757779	22.3256
	13000	186892	7.82873e+06	-3207.52	3029.78	186877	7.82873e+06	-3214.54	3040.23	3035	10.4474	15.2293	34.4503	0.601272	18.4683
	13125	186888	7.82886e+06	-3204.11	3024.71	186874	7.82886e+06	-3212.38	3037.01	3030.86	12.297	14.7145	39.8858	0.696139	19.1764
	13250	186885	7.82898e+06	-3200.4	3019.21	186871	7.82899e+06	-3208.23	3030.84	3025.02	11.6286	13.675	40.3764	0.704701	17.9508
	13375	186908	7.82911e+06	-3197.1	3014.31	186901	7.82911e+06	-3200.16	3018.85	3016.58	4.53653	7.87633	29.9407	0.522563	9.08937
	13500	186960	7.82923e+06	-3194.83	3010.95	186954	7.82923e+06	-3196.95	3014.09	3012.52	3.14028	5.66721	28.9915	0.505997	6.4791
	13625	187024	7.82934e+06	-3191.09	3005.42	187009	7.82935e+06	-3197.55	3014.98	3010.2	9.56432	15.2491	32.0962	0.560184	18.0003
	13750	187118	7.82946e+06	-3188.82	3002.06	187098	7.82946e+06	-3197.86	3015.44	3008.75	13.3801	20.3718	33.2966	0.581136	24.3728
	13875	187179	7.82958e+06	-3185.31	2996.88	187162	7.82958e+06	-3194.32	3010.2	3003.54	13.321	17.5487	37.2017	0.649292	22.032
	14000	187214	7.8297e+06	-3186.81	2999.09	187202	7.8297e+06	-3193.63	3009.18	3004.13	10.0845	12.8787	38.0621	0.664308	16.3572
	14125	187222	7.82982e+06	-3188.36	3001.38	187215	7.82982e+06	-3192.13	3006.96	3004.17	5.57459	6.92741	38.8242	0.677609	8.89185
	14250	187257	7.82994e+06	-3185.95	2997.82	187252	7.82995e+06	-3187.9	3000.7	2999.26	2.88043	4.58809	32.1208	0.560615	5.41733
	14375	187260	7.83007e+06	-3185.23	2996.76	187254	7.83007e+06	-3186.95	2999.3	2998.03	2.54003	6.70667	20.7433	0.362038	7.17155
	14500	187290	7.83019e+06	-3182.44	2992.64	187285	7.83019e+06	-3185.8	2997.6	2995.12	4.95887	4.70967	46.4764	0.811167	6.83896
	14625	187280	7.83032e+06	-3180.57	2989.88	187273	7.83032e+06	-3185.68	2997.42	2993.65	7.53928	7.1309	46.5945	0.813228	10.3774
	14750	187286	7.83045e+06	-3179.58	2988.42	187281	7.83045e+06	-3185.31	2996.88	2992.65	8.45224	5.37577	57.5429	1.00431	10.0169
	14875	187303	7.83057e+06	-3176.56	2983.97	187294	7.83057e+06	-3182.81	2993.19	2988.58	9.21135	8.93561	45.8705	0.800592	12.8333
	15000	187323	7.83069e+06	-3174.79	2981.37	187318	7.83069e+06	-3177.95	2986.02	2983.7	4.65244	4.9317	43.331	0.756269	6.77989
	15125	187360	7.83081e+06	-3173.45	2979.4	187354	7.83081e+06	-3175.93	2983.05	2981.22	3.64937	5.51718	33.4828	0.584386	6.61492
	15250	187409	7.83093e+06	-3171.26	2976.18	187402	7.83093e+06	-3175.1	2981.83	2979	5.64797	6.09144	42.8366	0.747639	8.30694
	15375	187488	7.83105e+06	-3166.06	2968.54	187483	7.83105e+06	-3170.93	2975.69	2972.12	7.15243	4.48764	57.8947	1.01045	8.4437
	15500	187518	7.83117e+06	-3166.18	2968.72	187509	7.83117e+06	-3171.6	2976.68	2972.7	7.96118	9.23827	40.7535	0.711283	12.1953
	15625	187514	7.8313e+06	-3166.79	2969.61	187507	7.8313e+06	-3170.4	2974.91	2972.26	5.30207	6.40401	39.6223	0.69154	8.31404
	15750	187478	7.83143e+06	-3168.18	2971.65	187471	7.83143e+06	-3169.56	2973.68	2972.67	2.027	6.63596	16.9857	0.296456	6.93864
	15875	187452	7.83156e+06	-3164.71	2966.56	187444	7.83156e+06	-3170.85	2975.57	2971.07	9.01562	8.5933	46.3739	0.809377	12.455
	16000	187437	7.83169e+06	-3162.19	2962.86	187426	7.83169e+06	-3170.2	2974.62	2968.74	11.7556	11.2749	46.1956	0.806266	16.2886
	16125	187522	7.8318e+06	-3160.73	2960.72	187512	7.8318e+06	-3164.72	2966.57	2963.65	5.84941	10.2876	29.622	0.517001	11.8343
	16250	187575	7.83192e+06	-3155.54	2953.13	187569	7.83192e+06	-3159.86	2959.45	2956.29	6.32322	6.858	42.6767	0.744849	9.32819
	16375	187612	7.83204e+06	-3152.95	2949.34	187604	7.83204e+06	-3156.57	2954.63	2951.99	5.29373	7.10977	36.6703	0.640017	8.86411
	16500	187626	7.83217e+06	-3150.82	2946.23	187620	7.83217e+06	-3154.77	2952	2949.11	5.77274	5.99099	43.9371	0.766847	8.31965
	16625	187620	7.83229e+06	-3149.01	2943.59	187612	7.83229e+06	-3152.96	2949.35	2946.47	5.76945	7.3926	37.9698	0.662698	9.37748
	16750	187650	7.83241e+06	-3146.38	2939.75	187644	7.83242e+06	-3148.96	2943.51	2941.63	3.76447	6.42385	30.3709	0.530073	7.44561
	16875	187713	7.83253e+06	-3145.55	2938.54	187709	7832533	-3147.73	2941.72	2940.13	3.1798	3.6616	40.9717	0.71509	4.84958
	17000	187727	7.83266e+06	-3145.18	2938	187726	7.83266e+06	-3147.07	2940.75	2939.38	2.75635	1.24036	65.7722	1.14794	3.02258
	17125	187786	7.83278e+06	-3143.29	2935.24	187783	7.83278e+06	-3145.15	2937.95	2936.6	2.71097	2.76355	44.4497	0.775794	3.87125
	17250	187812	7.8329e+06	-3141.13	2932.1	187812	7.8329e+06	-3141.13	2932.1	2932.1	0	0	0	0	0
	17375	187843	7.83302e+06	-3134.55	2922.53	187835	7.83302e+06	-3139.19	2929.27	2925.9	6.74717	7.96816	40.2568	0.702614	10.4411
	17500	187851	7.83314e+06	-3132.69	2919.82	187840	7.83315e+06	-3139.94	2930.36	2925.09	10.5406	11.1533	43.3821	0.757161	15.3461
	17625	187947	7.83326e+06	-3128.82	2914.21	187941	7.83326e+06	-3134.76	2922.83	2918.52	8.62367	6.75754	51.9176	0.906133	10.9559
	17750	187921	7.83339e+06	-3127.69	2912.57	187913	7.83339e+06	-3132.65	2919.77	2916.17	7.19721	8.73341	39.492	0.689265	11.3169
	17875	187936	7.83351e+06	-3127.75	2912.66	187930	7.83351e+06	-3131.56	2918.18	2915.42	5.5276	6.4648	40.5314	0.707407	8.50577
	18000	187963	7.83363e+06	-3132.66	2919.78	187963	7.83363e+06	-3132.66	2919.78	2919.78	0	0	0	0	0
	18125	188013	7.83375e+06	-3122.74	2905.4	188008	7.83375e+06	-3130.23	2916.25	2910.82	10.8557	5.41543	63.4874	1.10806	12.1315
	18250	187962	7.83389e+06	-3129.6	2915.34	187958	7.83389e+06	-3132.93	2920.17	2917.76	4.83368	4.17637	49.1725	0.858221	6.388
	18375	187965	7.83401e+06	-3143.9	2936.13	187952	7.83401e+06	-3154	2950.87	2943.5	14.7428	12.4148	49.8995	0.87091	19.2738
	18500	187961	7834139	-3139.54	2929.78	187961	7834139	-3139.54	2929.78	2929.78	0	0	0	0	0
	18625	187938	7.83427e+06	-3130.92	2917.25	187938	7.83427e+06	-3130.92	2917.25	2917.25	0	0	0	0	0
	18750	187959	7.83439e+06	-3126.67	2911.09	187958	7.83439e+06	-3129.87	2915.73	2913.41	4.64057	1.69434	69.9421	1.22072	4.94021
	18875	187995	7.83451e+06	-3122.87	2905.59	187995	7.83451e+06	-3122.87	2905.59	2905.59	0	0	0	0	0
HC	750	184643	7.81667e+06	-3254.63	3100.32	184607	7.81668e+06	-3294.65	3161.05	3130.69	60.7292	36.4482	59.0288	1.03025	70.8273
	875	184658	7.8168e+06	-3259.35	3107.45	184623	7.8168e+06	-3295.19	3161.88	3134.66	54.4295	36.0848	56.4571	0.985362	65.3046
	1000	184689	7.81692e+06	-3259.34	3107.43	184647	7.81692e+06	-3297.26	3165.04	3136.24	57.6064	42.3672	53.667	0.936665	71.5085
	1125	184689	7.81704e+06	-3261.72	3111.03	184643	7.81705e+06	-3297.48	3165.38	3138.2	54.3463	46.6143	49.3794	0.861834	71.599
	1250	184692	7.81717e+06	-3268	3120.53	184663	7.81717e+06	-3297.57	3165.51	3143.02	44.9824	29.1362	57.0678	0.996022	53.5942
	1375	184671	7.8173e+06	-3268.9	3121.89	184633	7.8173e+06	-3305.02	3176.91	3149.4	55.0157	38.9798	54.6816	0.954374	67.4252
	1500	184675	7.81742e+06	-3272.76	3127.75	184637	7.81743e+06	-3317.75	3196.44	3162.09	68.6975	37.8188	61.1667	1.06756	78.4194
	1625	184710	7.81754e+06	-3274.17	3129.88	184670	7.81755e+06	-3328.05	3212.3	3171.09	82.4171	41.1988	63.4403	1.10724	92.1408
	1750	184716	7.81767e+06	-3272.67	3127.61	184670	7.81768e+06	-3331.46	3217.56	3172.59	89.9535	45.6059	63.1153	1.10157	100.854
	1875	184733	7.81779e+06	-3276.89	3134.01	184699	7.8178e+06	-3313.22	3189.48	3161.75	55.4708	34.1585	58.3755	1.01885	65.1445
	2000	184732	7.81792e+06	-3278.56	3136.55	184703	7.81792e+06	-3317.72	3196.4	3166.47	59.8473	29.7118	63.5974	1.10998	66.8168
	2125	184737	7.81805e+06	-3278.79	3136.9	184708	7.81805e+06	-3314.22	3191.02	3163.96	54.1202	28.753	62.0192	1.08244	61.284
	2250	184715	7.81817e+06	-3275.77	3132.31	184684	7.81818e+06	-3306.71	3179.5	3155.91	47.1867	31.0837	56.6256	0.988303	56.5047
	2375	184743	7.8183e+06	-3275.51	3131.92	184719	7.8183e+06	-3303.36	3174.37	3153.14	42.451	23.7208	60.8044	1.06124	48.6289
	2500	184684	7.81843e+06	-3272.58	3127.47	184658	7.81843e+06	-3298.12	3166.35	3146.91	38.882	26.0899	56.1383	0.979799	46.824
	2625	184712	7.81855e+06	-3281.65	3141.25	184704	7.81855e+06	-3284.09	3144.96	3143.1	3.71186	7.76466	25.5499	0.44593	8.60627
	2750	184823	7.81866e+06	-3283.86	3144.61	184823	7.81866e+06	-3283.86	3144.61	3144.61	0	0	0	0	0
	2875	184833	7.81879e+06	-3283.56	3144.15	184833	7.81879e+06	-3283.56	3144.15	3144.15	0	0	0	0	0
	3000	184844	7.81891e+06	-3286.65	3148.86	184826	7.81892e+06	-3300.31	3169.7	3159.28	20.847	17.5487	49.9097	0.871089	27.2499
	3125	184910	7.81903e+06	-3291.25	3155.87	184898	7.81903e+06	-3302.66	3173.3	3164.58	17.4314	12.7882	53.7351	0.937855	21.6193
	3250	184945	7.81915e+06	-3298.43	3166.83	184926	7.81916e+06	-3316.3	3194.21	3180.52	27.3861	19.516	54.5254	0.951648	33.6284
	3375	184955	7.81928e+06	-3302.13	3172.49	184937	7.81928e+06	-3317.68	3196.33	3184.41	23.8488	18.2446	52.5836	0.917758	30.0272
	3500	184965	7.8194e+06	-3303.07	3173.92	184943	7.81941e+06	-3321.32	3201.93	3187.93	28.009	21.7945	52.1126	0.909536	35.4895
	3625	185016	7.81952e+06	-3305.31	3177.35	184994	7.81952e+06	-3323.56	3205.38	3191.37	28.0278	21.895	52.0035	0.907632	35.5661
	3750	185035	7.81965e+06	-3309.39	3183.61	185008	7.81965e+06	-3330.46	3216.02	3199.81	32.4118	26.4844	50.747	0.885703	41.8563
	3875	185049	7.81977e+06	-3316.67	3194.78	185027	7.81977e+06	-3335.22	3223.37	3209.08	28.5867	21.704	52.793	0.921411	35.8923
	4000	185060	7.81989e+06	-3320.34	3200.43	185035	7.8199e+06	-3341.72	3233.42	3216.92	32.9978	25.1422	52.6949	0.9197	41.4848
	4125	185080	7.82002e+06	-3326.49	3209.9	185058	7.82002e+06	-3344.26	3237.36	3223.63	27.4617	21.6035	51.8086	0.904231	34.9408
	4250	185126	7.82014e+06	-3325.39	3208.2	185100	7.82014e+06	-3346.76	3241.23	3224.72	33.032	26.0092	51.7832	0.903788	42.0427
	4375	185125	7.82026e+06	-3329.34	3214.29	185098	7.82027e+06	-3349.96	3246.2	3230.24	31.9066	27.5721	49.168	0.858144	42.1693
	4500	185143	7.82039e+06	-3333.01	3219.96	185124	7.82039e+06	-3346.77	3241.25	3230.6	21.2932	19.5755	47.4067	0.827404	28.924
	4625	185170	7.82051e+06	-3333.22	3220.28	185154	7.82051e+06	-3345.83	3239.79	3230.04	19.5115	16.0764	50.5133	0.881623	25.2814
	4750	185173	7.82064e+06	-3331.55	3217.7	185159	7.82064e+06	-3341.76	3233.49	3225.59	15.7845	14.5731	47.2852	0.825282	21.4831
	4875	185194	7.82076e+06	-3328.18	3212.5	185172	7.82076e+06	-3342.31	3234.34	3223.42	21.8356	22.3688	44.3089	0.773337	31.2595
	5000	185181	7.82089e+06	-3326.73	3210.27	185158	7.82089e+06	-3340.83	3232.05	3221.16	21.7797	23.015	43.4203	0.757828	31.6867
	5125	185183	7.82101e+06	-3323.2	3204.83	185164	7.82102e+06	-3335.38	3223.62	3214.22	18.7888	18.99	44.6949	0.780073	26.7141
	5250	185162	7.82114e+06	-3324.61	3207	185136	7.82115e+06	-3338.7	3228.75	3217.87	21.7505	26.2227	39.6742	0.692445	34.0692
	5375	185179	7.82127e+06	-3329.31	3214.24	185171	7.82127e+06	-3334.5	3222.26	3218.25	8.01232	8.78559	42.3643	0.739397	11.8905
	5500	185227	7.82139e+06	-3331.79	3218.07	185220	7.82139e+06	-3335.26	3223.43	3220.75	5.35957	6.96966	37.5598	0.655542	8.79211
	5625	185240	7.82151e+06	-3332.68	3219.45	185231	7.82151e+06	-3337.93	3227.56	3223.5	8.11316	9.02615	41.9508	0.732179	12.1365
	5750	185240	7.82164e+06	-3334.67	3222.52	185228	7.82164e+06	-3341.14	3232.53	3227.52	10.0062	11.6086	40.7602	0.7114	15.326
	5875	185264	7.82176e+06	-3336.02	3224.61	185245	7.82176e+06	-3347.7	3242.69	3233.65	18.085	18.9292	43.6935	0.762595	26.1798
	6000	185288	7.82188e+06	-3335.56	3223.89	185262	7.82189e+06	-3350.48	3247	3235.45	23.1097	26.0601	41.5661	0.725466	34.8309
	6125	185317	7.822e+06	-3334.96	3222.97	185297	7.82201e+06	-3349.86	3246.04	3234.5	23.0746	20.1411	48.8832	0.853173	30.6284
	6250	185367	7.82212e+06	-3331.23	3217.21	185351	7.82213e+06	-3342.45	3234.55	3225.88	17.3469	15.3185	48.5533	0.847415	23.1424
	6375	185392	7.82225e+06	-3326.99	3210.67	185386	7.82225e+06	-3337.54	3226.96	3218.81	16.2888	6.29365	68.8746	1.20209	17.4624
	6500	185438	7.82237e+06	-3326.33	3209.65	185432	7.82237e+06	-3332.1	3218.55	3214.1	8.90059	6.60622	53.4164	0.932292	11.0843
	6625	185473	7.82249e+06	-3324.12	3206.24	185464	7.82249e+06	-3331.57	3217.73	3211.99	11.4874	8.5213	53.4322	0.932567	14.3029
	6750	185449	7.82262e+06	-3321.85	3202.75	185440	7.82262e+06	-3328.91	3213.63	3208.19	10.878	8.71358	51.3044	0.895431	13.9377
	6875	185420	7.82275e+06	-3316.05	3193.83	185406	7.82275e+06	-3323	3204.52	3199.17	10.6899	14.8658	35.7195	0.623423	18.3103
	7000	185415	7.82287e+06	-3311.78	3187.27	185395	7.82288e+06	-3325.05	3207.68	3197.48	20.4039	20.2614	45.2008	0.788903	28.7549
	7125	185460	7.82299e+06	-3306.94	3179.85	185439	7.823e+06	-3323.75	3205.67	3192.76	25.8233	21.1793	50.6427	0.883882	33.3977
	7250	185478	7.82312e+06	-3304.45	3176.04	185454	7.82312e+06	-3322.55	3203.83	3189.93	27.7896	24.4365	48.6736	0.849514	37.0055
	7375	185528	7823237	-3306	3178.41	185500	7.82324e+06	-3323.1	3204.67	3191.54	26.2625	28.3994	42.7613	0.746325	38.6814
	7500	185569	7.82336e+06	-3304.75	3176.5	185545	7.82336e+06	-3323.39	3205.12	3190.81	28.6236	24.6684	49.2445	0.859479	37.7868
	7625	185623	7.82348e+06	-3306.25	3178.79	185585	7.82348e+06	-3328.63	3213.2	3195.99	34.4014	38.3943	41.8604	0.730602	51.5517
	7750	185648	7.8236e+06	-3305.49	3177.63	185612	7.8236e+06	-3329.25	3214.15	3195.89	36.5219	36.6293	44.9159	0.78393	51.7258
	7875	185727	7.82372e+06	-3307.6	3180.86	185696	7.82372e+06	-3331.7	3217.93	3199.4	37.0698	31.3441	49.7841	0.868896	48.545
	8000	185809	7.82383e+06	-3305.76	3178.04	185775	7.82384e+06	-3332.24	3218.77	3198.4	40.7227	34.4413	49.7771	0.868774	53.3343
	8125	185839	7.82395e+06	-3303.82	3175.07	185812	7.82396e+06	-3326.42	3209.79	3192.43	34.7155	27.4419	51.6743	0.901887	44.2518
	8250	185900	7.82407e+06	-3304.5	3176.11	185860	7.82408e+06	-3326.26	3209.54	3192.83	33.4278	40.1805	39.7584	0.693915	52.2675
	8375	185890	7.8242e+06	-3305.17	3177.14	185859	7.8242e+06	-3328.58	3213.12	3195.13	35.9786	31.5264	48.7734	0.851256	47.837
	8500	185877	7.82433e+06	-3305.88	3178.23	185848	7.82433e+06	-3324.02	3206.09	3192.16	27.8631	29.3682	43.4936	0.759106	40.4826
	8625	185899	7.82445e+06	-3302.03	3172.33	185875	7.82445e+06	-3319.49	3199.12	3185.73	26.785	24.7689	47.2395	0.824485	36.482
	8750	185956	7.82457e+06	-3294	3160.06	185914	7.82457e+06	-3317.27	3195.7	3177.88	35.6432	42.4888	39.9928	0.698005	55.4593
	8875	185998	7.82469e+06	-3289.18	3152.71	185966	7.82469e+06	-3313.66	3190.16	3171.43	37.4491	31.3242	50.0893	0.874223	48.8226
	9000	186023	7.82481e+06	-3286.62	3148.81	185994	7.82481e+06	-3307.08	3180.07	3164.44	31.2564	29.4786	46.6767	0.814662	42.9645
	9125	186063	7.82493e+06	-3282.74	3142.9	186038	7.82494e+06	-3304.47	3176.07	3159.49	33.1641	25.2724	52.6911	0.919633	41.696
	9250	186112	7.82505e+06	-3282.5	3142.54	186079	7.82506e+06	-3295	3161.59	3152.06	19.0495	33.3932	29.703	0.518415	38.4446
	9375	186140	7.82517e+06	-3276.1	3132.81	186118	7.82518e+06	-3290	3153.96	3143.39	21.1466	22.6318	43.057	0.751487	30.9738
	9500	186169	7.8253e+06	-3271.06	3125.17	186147	7.8253e+06	-3287.86	3150.7	3137.93	25.5308	22.1976	48.9948	0.85512	33.8313
	9625	186215	7.82542e+06	-3274.85	3130.92	186204	7.82542e+06	-3280.95	3140.18	3135.55	9.26572	10.4291	41.6196	0.726399	13.9506
	9750	186244	7.82554e+06	-3272.95	3128.03	186234	7.82554e+06	-3277.75	3135.32	3131.68	7.28543	9.52109	37.4228	0.653151	11.9887
	9875	186294	7.82566e+06	-3266.96	3118.96	186282	7.82566e+06	-3275.05	3131.22	3125.09	12.2628	12.3342	44.8337	0.782496	17.3928
	10000	186271	7.82579e+06	-3265.19	3116.28	186255	7.82579e+06	-3274.06	3129.72	3123	13.4395	15.3892	41.131	0.717871	20.4316
	10125	186263	7.82591e+06	-3267.63	3119.97	186249	7.82592e+06	-3276.03	3132.71	3126.34	12.7359	14.9068	40.5096	0.707026	19.6065
	10250	186282	7826038	-3269.24	3122.41	186266	7.82604e+06	-3278.67	3136.72	3129.56	14.3068	16.2377	41.3828	0.722267	21.6413
	10375	186326	7.82616e+06	-3264.93	3115.88	186300	7.82616e+06	-3279.01	3137.23	3126.56	21.3487	26.8267	38.5128	0.672176	34.2847
	10500	186320	7.82629e+06	-3270.81	3124.79	186302	7.82629e+06	-3275.88	3132.48	3128.63	7.69057	17.9717	23.1674	0.404347	19.548
	10625	186370	7.8264e+06	-3273.67	3129.13	186367	7.82641e+06	-3275.69	3132.19	3130.66	3.06533	3.26841	43.1636	0.753346	4.48093
	10750	186429	7.82652e+06	-3275.23	3131.49	186421	7.82652e+06	-3280.19	3139.03	3135.26	7.53366	8.04878	43.1066	0.752352	11.0245
	10875	186405	7.82665e+06	-3275.9	3132.51	186387	7.82665e+06	-3283.95	3144.74	3138.63	12.2352	17.2362	35.3693	0.61731	21.1373
	11000	186387	7.82678e+06	-3274.05	3129.7	186374	7.82678e+06	-3282.34	3142.3	3136	12.5934	13.2918	43.4546	0.758425	18.3102
	11125	186428	7.8269e+06	-3274.37	3130.19	186414	7.8269e+06	-3283.19	3143.59	3136.89	13.4009	13.6354	44.5031	0.776726	19.1182
	11250	186522	7.82702e+06	-3272.38	3127.17	186507	7.82702e+06	-3278.42	3136.34	3131.75	9.16764	14.3101	32.6453	0.569768	16.9948
	11375	186479	7.82715e+06	-3272.99	3128.09	186462	7.82715e+06	-3281.99	3141.76	3134.93	13.669	16.4795	39.6742	0.692445	21.4107
	11500	186481	7.82727e+06	-3272.57	3127.46	186448	7827277	-3284.47	3145.54	3136.5	18.0791	33.4329	28.4027	0.495721	38.0081
	11625	186524	7.82739e+06	-3271.4	3125.68	186502	7.8274e+06	-3283.33	3143.8	3134.74	18.1184	22.0674	39.3876	0.687443	28.5525
	11750	186514	7.82752e+06	-3271.56	3125.93	186497	7.82752e+06	-3282.84	3143.06	3134.49	17.1304	17.2051	44.8752	0.783221	24.2789
	11875	186569	7.82764e+06	-3269.5	3122.8	186546	7.82764e+06	-3282.87	3143.1	3132.95	20.2981	22.7732	41.7111	0.727996	30.5062
	12000	186578	7.82776e+06	-3271.62	3126.02	186560	7.82777e+06	-3283.77	3144.47	3135.24	18.4544	18.0014	45.7118	0.797821	25.7801
	12125	186636	7.82788e+06	-3273.12	3128.29	186616	7.82789e+06	-3286.61	3148.79	3138.54	20.5031	20.151	45.4962	0.794058	28.7479
	12250	186676	7.828e+06	-3272.75	3127.73	186648	7.82801e+06	-3288.32	3151.4	3139.56	23.6692	28.2184	39.9895	0.697949	36.8308
	12375	186677	7.82813e+06	-3268.59	3121.42	186652	7.82813e+06	-3286.86	3149.17	3135.3	27.7501	25.1931	47.7651	0.833658	37.4802
	12500	186685	7.82825e+06	-3269.53	3122.85	186668	7.82826e+06	-3282.09	3141.91	3132.38	19.0662	17.0749	48.1536	0.84044	25.5944
	12625	186749	7.82837e+06	-3271.41	3125.7	186732	7.82837e+06	-3283.98	3144.79	3135.24	19.0923	17.3875	47.6756	0.832096	25.8233
	12750	186778	7.82849e+06	-3271.07	3125.18	186756	7.8285e+06	-3285.54	3147.16	3136.17	21.9822	21.9247	45.075	0.786707	31.0469
	12875	186790	7.82862e+06	-3274.71	3130.7	186776	7.82862e+06	-3283.98	3144.79	3137.75	14.087	14.5731	44.0284	0.76844	20.2687
	13000	186786	7.82875e+06	-3278.18	3135.97	186779	7.82875e+06	-3281.88	3141.6	3138.78	5.62382	6.69675	40.023	0.698532	8.74493
	13125	186773	7.82887e+06	-3276.71	3133.74	186767	7.82887e+06	-3279	3137.22	3135.48	3.4784	5.81984	30.8659	0.538711	6.7801
	13250	186761	7.829e+06	-3275.5	3131.9	186761	7.829e+06	-3275.5	3131.9	3131.9	0	0	0	0	0
	13375	186782	7.82912e+06	-3268.58	3121.41	186770	7.82913e+06	-3272.31	3127.06	3124.24	5.65298	12.4855	24.3592	0.425148	13.7057
	13500	186795	7.82925e+06	-3263.5	3113.72	186788	7.82925e+06	-3267.14	3119.23	3116.47	5.508	7.74483	35.4198	0.618193	9.50371
	13625	186866	7.82937e+06	-3258.61	3106.33	186860	7.82937e+06	-3261.14	3110.15	3108.24	3.82203	5.58659	34.3777	0.600005	6.76889
	13750	186959	7.82948e+06	-3257.3	3104.35	186951	7.82948e+06	-3260.04	3108.49	3106.42	4.13776	7.90737	27.6221	0.482096	8.92455
	13875	187041	7.82959e+06	-3256.92	3103.78	187032	7.8296e+06	-3260.26	3108.82	3106.3	5.04371	9.02615	29.196	0.509566	10.3397
	14000	187084	7.82972e+06	-3256.5	3103.15	187078	7.82972e+06	-3259.1	3107.07	3105.11	3.9253	6.07161	32.8827	0.573911	7.22997
	14125	187101	7.82984e+06	-3254.33	3099.87	187099	7.82984e+06	-3256.84	3103.66	3101.77	3.78687	2.14832	60.4333	1.05476	4.35381
	14250	187143	7.82996e+06	-3253.31	3098.33	187134	7.82996e+06	-3255.69	3101.92	3100.13	3.58955	9.31889	21.0662	0.367675	9.98632
	14375	187161	7.83008e+06	-3249.04	3091.9	187153	7.83008e+06	-3254.37	3099.93	3095.92	8.03192	8.03887	44.9752	0.784966	11.3638
	14500	187204	7.8302e+06	-3247.91	3090.2	187195	7.8302e+06	-3250.7	3094.4	3092.3	4.20125	8.77437	25.5855	0.446552	9.72831
	14625	187186	7.83033e+06	-3248.54	3091.15	187181	7.83033e+06	-3251.81	3096.07	3093.61	4.92535	4.55834	47.2162	0.824078	6.71101
	14750	187200	7.83046e+06	-3248.63	3091.28	187191	7.83046e+06	-3252.41	3096.98	3094.13	5.69413	8.61313	33.4686	0.584138	10.3252
	14875	187201	7.83058e+06	-3248.67	3091.34	187200	7.83058e+06	-3251.56	3095.7	3093.52	4.35291	0.656201	81.4272	1.42117	4.40209
	15000	187228	7.8307e+06	-3245.07	3085.93	187220	7.83071e+06	-3251.07	3094.96	3090.44	9.03154	8.09836	48.1182	0.839821	12.1306
	15125	187275	7.83082e+06	-3240.38	3078.88	187266	7.83083e+06	-3247.59	3089.72	3084.3	10.8394	9.14644	49.8418	0.869903	14.1827
	15250	187313	7.83095e+06	-3238.26	3075.7	187305	7.83095e+06	-3241.94	3081.22	3078.46	5.52586	7.85649	35.1206	0.61297	9.60519
	15375	187372	7.83106e+06	-3238.38	3075.88	187365	7.83107e+06	-3241.14	3080.02	3077.95	4.14396	7.14944	30.0975	0.5253	8.26359
	15500	187398	7.83119e+06	-3237.22	3074.14	187393	7.83119e+06	-3240.28	3078.73	3076.43	4.59297	5.22315	41.3268	0.721288	6.95534
	15625	187392	7.83131e+06	-3238.34	3075.82	187383	7.83132e+06	-3241.32	3080.29	3078.05	4.47437	9.35855	25.5527	0.445979	10.3732
	15750	187374	7.83144e+06	-3237.24	3074.17	187368	7.83144e+06	-3241.56	3080.65	3077.41	6.48549	6.2626	46.0016	0.80288	9.01564
	15875	187355	7.83157e+06	-3234.83	3070.55	187344	7.83157e+06	-3242.89	3082.65	3076.6	12.0982	11.2762	47.0141	0.820551	16.5385
	16000	187335	7.8317e+06	-3235.28	3071.23	187325	7.8317e+06	-3242.62	3082.24	3076.73	11.0178	10.3571	46.7706	0.816301	15.1215
	16125	187407	7.83182e+06	-3231.56	3065.65	187388	7.83182e+06	-3243.94	3084.23	3074.94	18.5763	19.5444	43.5452	0.760008	26.9642
	16250	187459	7.83194e+06	-3230.31	3063.78	187446	7.83194e+06	-3237.67	3074.81	3069.29	11.031	12.6071	41.1854	0.718821	16.7518
	16375	187508	7.83206e+06	-3225.54	3056.64	187493	7832057	-3235.95	3072.23	3064.44	15.5868	15.0171	46.0664	0.80401	21.644
	16500	187521	7.83218e+06	-3220.6	3049.26	187507	7.83218e+06	-3229.56	3062.66	3055.96	13.3924	13.6354	44.4849	0.776409	19.1123
	16625	187494	7.83231e+06	-3217.02	3043.92	187477	7.83231e+06	-3226.15	3057.56	3050.74	13.6318	17.0736	38.6043	0.673773	21.848
	16750	187566	7.83243e+06	-3215.15	3041.14	187556	7.83243e+06	-3221.32	3050.34	3045.74	9.2028	9.55084	43.9368	0.766842	13.2631
	16875	187594	7.83255e+06	-3214.47	3040.12	187583	7.83255e+06	-3220.73	3049.46	3044.79	9.33521	10.893	40.5964	0.708541	14.3458
	17000	187624	7.83267e+06	-3213.3	3038.38	187615	7.83267e+06	-3217.46	3044.58	3041.48	6.19934	9.77158	32.3921	0.565349	11.5722
	17125	187694	7.83279e+06	-3208.41	3031.1	187688	7.83279e+06	-3212.51	3037.2	3034.15	6.10066	5.84958	46.2036	0.806405	8.45196
	17250	187706	7.83291e+06	-3203.95	3024.48	187698	7.83291e+06	-3207.14	3029.22	3026.85	4.7394	8.53251	29.0501	0.507019	9.76041
	17375	187732	7.83303e+06	-3199.2	3017.43	187720	7.83304e+06	-3205.71	3027.09	3022.26	9.66269	12.1419	38.5132	0.672182	15.5175
	17500	187750	7.83316e+06	-3198.91	3017	187744	7.83316e+06	-3203.35	3023.58	3020.29	6.58752	6.61613	44.8758	0.783231	9.33641
	17625	187852	7.83327e+06	-3195.18	3011.47	187841	7.83327e+06	-3203.45	3023.73	3017.6	12.2631	10.9934	48.125	0.839939	16.4693
	17750	187809	7.8334e+06	-3192.18	3007.03	187794	7.8334e+06	-3201.05	3020.17	3013.6	13.1418	15.1473	40.9448	0.714622	20.0536
	17875	187851	7.83352e+06	-3193.2	3008.54	187845	7.83352e+06	-3196.64	3013.63	3011.09	5.09402	6.14232	39.67	0.692372	7.9798
	18000	187896	7.83364e+06	-3188.68	3001.85	187888	7.83364e+06	-3195.52	3011.97	3006.91	10.1199	8.08715	51.3706	0.896586	12.9544
	18125	187918	7.83377e+06	-3187.81	3000.57	187908	7.83377e+06	-3194.48	3010.43	3005.5	9.8655	10.4278	43.4129	0.757698	14.355
	18250	187890	7.8339e+06	-3187.12	2999.55	187880	7.8339e+06	-3191.97	3006.72	3003.13	7.16999	10.6399	33.9752	0.59298	12.8303
	18375	187917	7.83402e+06	-3183.61	2994.37	187910	7.83402e+06	-3188.37	3001.4	2997.88	7.02916	6.27382	48.2498	0.842117	9.42178
	18500	187916	7.83414e+06	-3183.82	2994.68	187911	7.83415e+06	-3188.68	3001.85	2998.27	7.17742	4.44798	58.2127	1.016	8.44392
	18625	187871	7.83428e+06	-3182.58	2992.85	187868	7.83428e+06	-3186.31	2998.35	2995.6	5.5055	2.73381	63.5929	1.1099	6.14689
	18750	187889	7.8344e+06	-3186.04	2997.95	187885	7.8344e+06	-3188.26	3001.23	2999.59	3.27949	4.57818	35.6152	0.621603	5.63159
	18875	187914	7.83452e+06	-3187.04	2999.43	187910	7.83452e+06	-3191.4	3005.88	3002.65	6.44495	4.76917	53.4991	0.933735	8.01763
HB	750	184604	7.81668e+06	-3297.81	3165.88	184563	7.81668e+06	-3342.83	3235.14	3200.51	69.2621	41.4493	59.1019	1.03152	80.7173
	875	184619	7.8168e+06	-3298.82	3167.42	184578	7.81681e+06	-3340.32	3231.26	3199.34	63.8323	41.783	56.7923	0.991212	76.2915
	1000	184643	7.81692e+06	-3304.22	3175.69	184607	7.81693e+06	-3340.56	3231.63	3203.66	55.9427	36.8612	56.6187	0.988183	66.9951
	1125	184637	7.81705e+06	-3303.04	3173.88	184601	7.81705e+06	-3339.89	3230.59	3202.23	56.7122	36.4892	57.2424	0.999068	67.4368
	1250	184654	7.81717e+06	-3306.33	3178.92	184621	7.81718e+06	-3340.32	3231.26	3205.09	52.3397	33.5135	57.3682	1.00126	62.1498
	1375	184631	7.8173e+06	-3306.72	3179.51	184590	7.81731e+06	-3345.98	3240.02	3209.77	60.5093	40.957	55.9071	0.975763	73.0675
	1500	184641	7.81743e+06	-3308.96	3182.95	184611	7.81743e+06	-3349.56	3245.58	3214.26	62.6289	30.255	64.2156	1.12077	69.5539
	1625	184678	7.81755e+06	-3311.01	3186.09	184644	7.81755e+06	-3358.46	3259.41	3222.75	73.315	33.7963	65.2515	1.13885	80.7297
	1750	184686	7.81767e+06	-3311.24	3186.44	184651	7.81768e+06	-3357.01	3257.15	3221.8	70.7064	35.5105	63.3331	1.10537	79.1227
	1875	184705	7.8178e+06	-3311.66	3187.09	184659	7.8178e+06	-3367.01	3272.73	3229.91	85.6384	45.7063	61.9106	1.08054	97.0722
	2000	184709	7.81792e+06	-3309.78	3184.2	184672	7.81793e+06	-3358.47	3259.42	3221.81	75.2173	36.9518	63.8366	1.11416	83.8038
	2125	184712	7.81805e+06	-3309.5	3183.78	184673	7.81805e+06	-3360.75	3262.97	3223.37	79.1956	39.3519	63.5775	1.10964	88.4337
	2250	184678	7.81818e+06	-3316.77	3194.94	184645	7.81818e+06	-3346.38	3240.64	3217.79	45.7074	33.2518	53.9644	0.941856	56.523
	2375	184709	7.8183e+06	-3315.21	3192.54	184690	7.8183e+06	-3338.5	3228.44	3210.49	35.901	19.8273	61.0892	1.06621	41.0122
	2500	184639	7.81844e+06	-3317.24	3195.66	184619	7.81844e+06	-3339.57	3230.1	3212.88	34.4371	19.3039	60.727	1.05989	39.4785
	2625	184669	7.81856e+06	-3320.05	3199.98	184655	7.81856e+06	-3330.58	3216.2	3208.09	16.2243	14.0186	49.1713	0.858201	21.4418
	2750	184768	7.81867e+06	-3327.55	3211.53	184768	7.81867e+06	-3327.55	3211.53	3211.53	0	0	0	0	0
	2875	184774	7.8188e+06	-3331.31	3217.33	184763	7.8188e+06	-3340.16	3231.01	3224.17	13.6782	11.074	51.006	0.890223	17.5991
	3000	184790	7.81892e+06	-3330.51	3216.1	184771	7.81892e+06	-3343.75	3236.57	3226.33	20.4717	18.7792	47.4691	0.828492	27.7804
	3125	184864	7.81904e+06	-3332.63	3219.37	184844	7.81904e+06	-3350.72	3247.38	3233.37	28.0086	20.3011	54.0648	0.943609	34.5921
	3250	184897	7.81916e+06	-3343.32	3235.9	184886	7.81916e+06	-3353.17	3251.18	3243.54	15.2804	10.7615	54.8443	0.957214	18.6896
	3375	184909	7.81928e+06	-3341.6	3233.24	184888	7.81929e+06	-3359.75	3261.41	3247.33	28.1766	20.9275	53.3977	0.931966	35.0982
	3500	184919	7.81941e+06	-3341.91	3233.72	184894	7.81941e+06	-3362.7	3266.01	3249.86	32.2906	24.8198	52.4528	0.915474	40.7272
	3625	184967	7.81953e+06	-3345.75	3239.67	184943	7.81953e+06	-3366.27	3271.57	3255.62	31.9062	24.6387	52.3239	0.913224	40.3122
	3750	184975	7.81965e+06	-3357.23	3257.49	184957	7.81966e+06	-3370.9	3278.8	3268.15	21.3059	18.6279	48.8366	0.852359	28.3008
	3875	184998	7.81978e+06	-3360.51	3262.6	184976	7.81978e+06	-3378.98	3291.43	3277.02	28.8353	21.6035	53.1593	0.927805	36.0304
	4000	185004	7.8199e+06	-3367.93	3274.16	184990	7.8199e+06	-3379.84	3292.78	3283.47	18.6165	14.0186	53.0195	0.925364	23.3045
	4125	185028	7.82002e+06	-3369.48	3276.58	185010	7.82003e+06	-3384.29	3299.75	3288.17	23.1699	17.9915	52.1706	0.910548	29.335
	4250	185068	7.82015e+06	-3373.17	3282.35	185050	7.82015e+06	-3388.25	3305.96	3294.15	23.6189	18.345	52.1631	0.910418	29.9064
	4375	185067	7.82027e+06	-3373.42	3282.74	185041	7.82028e+06	-3388.08	3305.7	3294.22	22.9613	25.7376	41.7371	0.72845	34.4913
	4500	185082	7.8204e+06	-3376.07	3286.88	185068	7.8204e+06	-3386	3302.43	3294.66	15.5542	14.1501	47.7063	0.832632	21.0276
	4625	185117	7.82052e+06	-3375.31	3285.69	185106	7.82052e+06	-3384.06	3299.39	3292.54	13.7005	11.1546	50.8482	0.887469	17.6672
	4750	185111	7.82064e+06	-3375.49	3285.97	185103	7.82065e+06	-3381.16	3294.85	3290.41	8.87435	8.08844	47.6527	0.831697	12.0074
	4875	185120	7.82077e+06	-3375.65	3286.22	185106	7.82077e+06	-3384.3	3299.77	3292.99	13.545	13.6962	44.6822	0.779851	19.2627
	5000	185110	7.8209e+06	-3370.37	3277.97	185089	7.8209e+06	-3383.37	3298.31	3288.14	20.3381	21.2289	43.7724	0.763973	29.3991
	5125	185111	7.82102e+06	-3371.96	3280.45	185099	7.82102e+06	-3377.25	3288.73	3284.59	8.27055	11.8406	34.934	0.609714	14.443
	5250	185077	7.82115e+06	-3371.01	3278.97	185050	7.82116e+06	-3385.45	3301.57	3290.27	22.6	26.8366	40.1019	0.69991	35.0851
	5375	185109	7.82127e+06	-3369.97	3277.35	185089	7.82128e+06	-3380.59	3293.95	3285.65	16.6069	19.7466	40.0639	0.699246	25.8016
	5500	185161	7.82139e+06	-3375.31	3285.69	185148	7.8214e+06	-3380.4	3293.66	3289.67	7.96547	12.354	32.8126	0.572687	14.6994
	5625	185171	7.82152e+06	-3376.44	3287.46	185155	7.82152e+06	-3382.37	3296.74	3292.1	9.28424	16.4696	29.4108	0.513315	18.9062
	5750	185170	7.82164e+06	-3373.79	3283.31	185151	7.82165e+06	-3384.45	3300	3291.66	16.6883	19.0905	41.159	0.71836	25.3564
	5875	185201	7.82177e+06	-3375.34	3285.74	185183	7.82177e+06	-3386.64	3303.44	3294.59	17.6999	18.3239	44.0077	0.768079	25.4765
	6000	185210	7.82189e+06	-3380.35	3293.58	185193	7.82189e+06	-3390.41	3309.36	3301.47	15.778	17.5686	41.9263	0.731752	23.6135
	6125	185272	7.82201e+06	-3376.75	3287.94	185246	7.82201e+06	-3387.59	3304.93	3296.44	16.9853	25.435	33.7347	0.588782	30.5849
	6250	185311	7.82213e+06	-3373.25	3282.47	185303	7.82213e+06	-3378.22	3290.24	3286.36	7.77284	7.67542	45.3613	0.791704	10.9238
	6375	185349	7.82225e+06	-3368	3274.27	185336	7.82225e+06	-3372.23	3280.88	3277.57	6.60458	13.0796	26.7916	0.467601	14.6526
	6500	185395	7822372	-3364.68	3269.09	185388	7.82237e+06	-3367.25	3273.1	3271.1	4.00781	6.24277	32.7001	0.570725	7.41854
	6625	185427	7.82249e+06	-3367.13	3272.91	185418	7.82249e+06	-3370.01	3277.41	3275.16	4.49469	8.90457	26.7829	0.46745	9.97465
	6750	185400	7.82262e+06	-3361.55	3264.22	185391	7.82262e+06	-3368.73	3275.41	3269.81	11.1942	8.86491	51.6236	0.901002	14.2792
	6875	185375	7.82275e+06	-3356.61	3256.53	185364	7.82275e+06	-3366.68	3272.21	3264.37	15.6838	11.306	54.2132	0.9462	19.334
	7000	185353	7.82288e+06	-3352.43	3250.03	185335	7.82288e+06	-3364.4	3268.66	3259.34	18.6252	18.2843	45.5292	0.794635	26.1
	7125	185417	7.823e+06	-3350	3246.26	185389	7.823e+06	-3363.73	3267.61	3256.94	21.3539	28.9836	36.3813	0.634973	36.0006
	7250	185422	7.82312e+06	-3346.01	3240.07	185390	7.82313e+06	-3364	3268.03	3254.05	27.964	32.4146	40.7843	0.711821	42.8099
	7375	185471	7.82324e+06	-3344.99	3238.49	185451	7.82325e+06	-3359.83	3261.54	3250.01	23.0499	19.9786	49.0827	0.856656	30.5031
	7500	185509	7.82337e+06	-3347.96	3243.09	185484	7.82337e+06	-3366.4	3271.78	3257.43	28.682	25.435	48.4336	0.845325	38.3353
	7625	185561	7.82348e+06	-3345.27	3238.92	185524	7.82349e+06	-3366.91	3272.57	3255.75	33.6485	36.7509	42.4767	0.741358	49.8282
	7750	185587	7.82361e+06	-3346.42	3240.71	185546	7.82361e+06	-3368	3274.27	3257.49	33.5663	41.8438	38.7359	0.676069	53.6433
	7875	185675	7.82372e+06	-3347.93	3243.05	185646	7.82373e+06	-3370.81	3278.66	3260.85	35.6111	29.7515	50.1227	0.874807	46.4036
	8000	185756	7.82384e+06	-3349.5	3245.48	185712	7.82384e+06	-3374.8	3284.89	3265.19	39.4099	43.9512	41.8818	0.730975	59.0326
	8125	185788	7.82396e+06	-3345.24	3238.88	185762	7.82396e+06	-3372	3280.52	3259.7	41.6408	26.8875	57.1496	0.99745	49.567
	8250	185834	7.82408e+06	-3347.81	3242.86	185801	7.82408e+06	-3375.38	3285.8	3264.33	42.9389	33.1699	52.3143	0.913056	54.2586
	8375	185842	7.8242e+06	-3348.36	3243.71	185792	7.82421e+06	-3372.24	3280.89	3262.3	37.1777	50.5078	36.356	0.634531	62.7154
	8500	185821	7.82433e+06	-3345.52	3239.31	185779	7.82434e+06	-3366.71	3272.26	3255.78	32.949	42.5086	37.7797	0.659381	53.7831
	8625	185840	7.82446e+06	-3343.76	3236.58	185818	7.82446e+06	-3362	3264.92	3250.75	28.3348	22.7309	51.2625	0.894699	36.3257
	8750	185884	7.82458e+06	-3337.41	3226.75	185852	7.82458e+06	-3359.46	3260.96	3243.86	34.2084	32.6961	46.2949	0.807998	47.3207
	8875	185945	7.8247e+06	-3330.88	3216.67	185911	7.8247e+06	-3357.33	3257.65	3237.16	40.9819	33.8459	50.4475	0.880476	53.1513
	9000	185970	7.82482e+06	-3323.43	3205.18	185935	7.82482e+06	-3345.79	3239.73	3222.46	34.5472	36.1456	43.7047	0.762792	50.0001
	9125	186021	7.82494e+06	-3324.16	3206.31	185985	7.82494e+06	-3342.11	3234.03	3220.17	27.7214	36.0141	37.5868	0.656014	45.4476
	9250	186049	7.82506e+06	-3323.55	3205.37	186030	7.82506e+06	-3338.97	3229.17	3217.27	23.8008	19.4129	50.7979	0.88659	30.7139
	9375	186085	7.82518e+06	-3316.77	3194.94	186062	7.82518e+06	-3334.37	3222.06	3208.5	27.1196	23.9118	48.5969	0.848175	36.1559
	9500	186110	7.8253e+06	-3316.16	3194	186090	7.82531e+06	-3329	3213.77	3203.88	19.7673	20.2205	44.3508	0.774067	28.2775
	9625	186165	7.82542e+06	-3313.68	3190.19	186150	7.82542e+06	-3324.28	3206.49	3198.34	16.3013	15.9536	45.6177	0.796179	22.8089
	9750	186179	7.82555e+06	-3312.29	3188.06	186168	7.82555e+06	-3317.5	3196.06	3192.06	8.00245	11.1844	35.5838	0.621054	13.7524
	9875	186228	7.82567e+06	-3310.8	3185.77	186219	7.82567e+06	-3316.54	3194.58	3190.18	8.81329	8.74463	45.2241	0.789309	12.4154
	10000	186197	7.8258e+06	-3307.96	3181.41	186180	7.8258e+06	-3317.69	3196.35	3188.88	14.9358	16.8628	41.5321	0.724872	22.5263
	10125	186195	7.82592e+06	-3306.39	3179.01	186169	7.82593e+06	-3321.19	3201.73	3190.37	22.725	26.2921	40.8378	0.712754	34.7519
	10250	186216	7.82605e+06	-3312.42	3188.26	186192	7.82605e+06	-3321.88	3202.8	3195.53	14.5402	24.1041	31.0994	0.542787	28.15
	10375	186240	7.82617e+06	-3310.43	3185.2	186224	7.82617e+06	-3319.04	3198.43	3191.81	13.2242	16.3976	38.8851	0.678672	21.0656
	10500	186230	7.8263e+06	-3313.18	3189.42	186219	7.8263e+06	-3319.04	3198.43	3193.92	9.00411	11.3357	38.4606	0.671264	14.4766
	10625	186294	7.82641e+06	-3313.88	3190.5	186283	7.82642e+06	-3319.52	3199.16	3194.83	8.66761	10.7416	38.9007	0.678945	13.8025
	10750	186367	7.82653e+06	-3313.91	3190.54	186349	7.82653e+06	-3324.64	3207.05	3198.79	16.5027	17.4272	43.4392	0.758158	24.0009
	10875	186335	7.82666e+06	-3316.16	3194	186315	7826664	-3328.38	3212.81	3203.4	18.8111	20.0691	43.1468	0.753053	27.5069
	11000	186322	7.82679e+06	-3315.36	3192.77	186306	7.82679e+06	-3325.24	3207.97	3200.37	15.2	15.8333	43.831	0.764996	21.9484
	11125	186368	7.82691e+06	-3313.15	3189.38	186349	7.82691e+06	-3325.95	3209.06	3199.22	19.6879	19.7962	44.8429	0.782655	27.9196
	11250	186456	7.82702e+06	-3311.06	3186.17	186447	7.82702e+06	-3316.42	3194.4	3190.28	8.23	8.55234	43.8997	0.766194	11.8691
	11375	186408	7.82716e+06	-3312.18	3187.89	186386	7.82716e+06	-3323.93	3205.95	3196.92	18.0648	21.5117	40.0225	0.698524	28.0908
	11500	186388	7.82728e+06	-3313.46	3189.85	186359	7.82729e+06	-3325.36	3208.15	3199	18.3029	30.0132	31.376	0.547615	35.1537
	11625	186446	7.8274e+06	-3314.11	3190.85	186426	7.82741e+06	-3325.02	3207.63	3199.24	16.781	20.1907	39.7307	0.693432	26.2539
	11750	186460	7.82753e+06	-3312.78	3188.81	186434	7.82753e+06	-3324.32	3206.55	3197.68	17.7446	26.6357	33.6714	0.587677	32.0052
	11875	186496	7.82765e+06	-3312.66	3188.62	186465	7.82765e+06	-3324.29	3206.51	3197.56	17.8826	30.9509	30.0182	0.523916	35.7455
	12000	186522	7.82777e+06	-3315.97	3193.71	186499	7.82777e+06	-3325.73	3208.72	3201.22	15.0179	23.6091	32.4606	0.566545	27.9809
	12125	186572	7.82789e+06	-3316.2	3194.06	186555	7.82789e+06	-3328.63	3213.2	3203.63	19.1352	16.5205	49.1941	0.858599	25.2801
	12250	186613	7.82801e+06	-3316.04	3193.81	186595	7.82801e+06	-3327.64	3211.67	3202.74	17.8544	18.3239	44.2565	0.772421	25.5841
	12375	186612	7.82814e+06	-3315.72	3193.32	186596	7.82814e+06	-3327.78	3211.88	3202.6	18.5619	16.6408	48.1237	0.839918	24.9291
	12500	186625	7.82826e+06	-3313.8	3190.37	186610	7.82826e+06	-3324.73	3207.18	3198.78	16.8102	15.4103	47.4878	0.828818	22.8049
	12625	186689	7.82838e+06	-3315.6	3193.14	186673	7.82838e+06	-3326.62	3210.1	3201.62	16.958	16.2278	46.2605	0.807399	23.4715
	12750	186709	7.8285e+06	-3316.79	3194.97	186693	7.82851e+06	-3327.81	3211.93	3203.45	16.964	16.6917	45.4637	0.79349	23.7989
	12875	186722	7.82863e+06	-3318.76	3198	186710	7.82863e+06	-3326.49	3209.9	3203.95	11.9006	11.5677	45.8128	0.799583	16.5962
	13000	186722	7.82875e+06	-3320.34	3200.43	186715	7.82875e+06	-3323.09	3204.66	3202.54	4.23257	7.30077	30.1027	0.525391	8.43895
	13125	186713	7.82888e+06	-3314.72	3191.79	186704	7.82888e+06	-3320.89	3201.27	3196.53	9.48525	9.3896	45.2904	0.790466	13.3467
	13250	186691	7.82901e+06	-3313.96	3190.62	186686	7.82901e+06	-3316.68	3194.8	3192.71	4.1784	5.75905	35.9622	0.62766	7.11517
	13375	186696	7.82914e+06	-3308.28	3181.9	186680	7.82914e+06	-3316.37	3194.32	3188.11	12.4165	16.5899	36.8126	0.642501	20.7218
	13500	186702	7.82926e+06	-3303.24	3174.18	186672	7.82926e+06	-3315.56	3193.08	3183.63	18.8921	29.6001	32.5479	0.568067	35.1153
	13625	186773	7.82938e+06	-3298.42	3166.81	186749	7.82938e+06	-3308.63	3182.44	3174.63	15.629	24.114	32.9484	0.575059	28.7359
	13750	186833	7.8295e+06	-3300.29	3169.67	186807	7.8295e+06	-3308.67	3182.5	3176.09	12.8314	25.9088	26.347	0.459842	28.9121
	13875	186955	7.82961e+06	-3302.68	3173.33	186945	7.82961e+06	-3306.8	3179.64	3176.48	6.309	10.5084	30.9797	0.540698	12.2568
	14000	187000	7.82973e+06	-3301.31	3171.23	186994	7.82973e+06	-3303.87	3175.15	3173.19	3.91762	5.728	34.3699	0.599868	6.93958
	14125	187021	7.82985e+06	-3298.53	3166.98	187008	7.82985e+06	-3305.24	3177.25	3172.11	10.2663	12.3441	39.7494	0.693758	16.0553
	14250	187070	7.82997e+06	-3297.72	3165.74	187070	7.82997e+06	-3297.72	3165.74	3165.74	0	0	0	0	0
	14375	187098	7.83009e+06	-3291.13	3155.68	187082	7.83009e+06	-3301.83	3172.03	3163.85	16.3444	16.126	45.3853	0.792124	22.9606
	14500	187137	7.83021e+06	-3292.52	3157.8	187126	7.83021e+06	-3300.15	3169.46	3163.63	11.6544	10.6808	47.4959	0.82896	15.8084
	14625	187122	7.83034e+06	-3294.16	3160.31	187115	7.83034e+06	-3299.38	3168.28	3164.29	7.97431	7.29215	47.5585	0.830053	10.8058
	14750	187144	7.83046e+06	-3292.59	3157.91	187138	7.83046e+06	-3296.07	3163.22	3160.57	5.31231	6.35444	39.8956	0.696309	8.28248
	14875	187142	7.83059e+06	-3290.43	3154.62	187134	7.83059e+06	-3296.11	3163.28	3158.95	8.66789	7.58359	48.8171	0.85202	11.5171
	15000	187173	7.83071e+06	-3286.26	3148.26	187162	7.83071e+06	-3294.83	3161.33	3154.79	13.0674	11.5875	48.435	0.845351	17.465
	15125	187223	7.83083e+06	-3282.32	3142.26	187211	7.83083e+06	-3291.51	3156.26	3149.26	13.9974	11.6694	50.1826	0.875852	18.2237
	15250	187249	7.83095e+06	-3283.35	3143.83	187234	7.83096e+06	-3293.49	3159.28	3151.56	15.4514	14.5929	46.6367	0.813965	21.2532
	15375	187302	7.83107e+06	-3282.8	3142.99	187295	7.83107e+06	-3285.61	3147.27	3145.13	4.27645	6.73771	32.4035	0.565547	7.98028
	15500	187322	7.8312e+06	-3282.09	3141.91	187317	7.8312e+06	-3285.33	3146.85	3144.38	4.93012	5.37448	42.5308	0.742303	7.29322
	15625	187301	7.83133e+06	-3285.02	3146.37	187301	7.83133e+06	-3287.85	3150.68	3148.53	4.30979	0.261725	86.5248	1.51014	4.31773
	15750	187309	7.83145e+06	-3282.06	3141.87	187282	7.83145e+06	-3298.25	3166.55	3154.21	24.6834	28.1377	41.2583	0.720093	37.4299
	15875	187294	7.83158e+06	-3285.36	3146.89	187267	7.83158e+06	-3298.03	3166.22	3156.55	19.3257	27.0077	35.5861	0.621094	33.21
	16000	187268	7.83171e+06	-3283.37	3143.86	187250	7.83171e+06	-3296.16	3163.36	3153.61	19.4974	17.8811	47.476	0.828612	26.4553
	16125	187331	7.83183e+06	-3279.72	3138.31	187314	7.83183e+06	-3291.31	3155.96	3147.13	17.6454	17.8204	44.7174	0.780467	25.0784
	16250	187387	7.83194e+06	-3275.34	3131.66	187364	7.83195e+06	-3290.02	3153.99	3142.82	22.3308	23.2966	43.7874	0.764234	32.2706
	16375	187440	7.83206e+06	-3273.02	3128.14	187426	7.83207e+06	-3282.63	3142.74	3135.44	14.597	13.8574	46.4889	0.811384	20.1271
	16500	187452	7.83219e+06	-3266.29	3117.94	187434	7.83219e+06	-3278.32	3136.18	3127.06	18.2423	18.3054	44.9011	0.783672	25.8431
	16625	187407	7.83232e+06	-3263.89	3114.31	187398	7.83232e+06	-3270.44	3124.23	3119.27	9.91693	9.85349	45.1839	0.788607	13.9799
	16750	187510	7.83243e+06	-3258.51	3106.18	187498	7.83243e+06	-3267.79	3120.21	3113.2	14.0331	11.7289	50.1111	0.874603	18.2892
	16875	187513	7.83256e+06	-3261.34	3110.46	187501	7.83256e+06	-3268.19	3120.82	3115.64	10.3636	11.91	41.0285	0.716082	15.7877
	17000	187553	7.83268e+06	-3261.31	3110.41	187549	7832680	-3263.15	3113.19	3111.8	2.78165	3.65038	37.308	0.651147	4.58943
	17125	187628	7.8328e+06	-3255.73	3101.98	187623	7.8328e+06	-3257.46	3104.59	3103.29	2.61087	5.43656	25.6524	0.447718	6.03099
	17250	187630	7.83292e+06	-3249.39	3092.43	187624	7.83292e+06	-3253.33	3098.36	3095.4	5.93667	6.67692	41.6413	0.726778	8.9345
	17375	187647	7.83305e+06	-3249.19	3092.13	187642	7.83305e+06	-3252.13	3096.56	3094.34	4.42895	5.30506	39.857	0.695635	6.91081
	17500	187682	7.83317e+06	-3243.84	3084.08	187668	7.83317e+06	-3250.49	3094.08	3089.08	10.0072	13.4332	36.6847	0.640268	16.7509
	17625	187778	7.83328e+06	-3242.21	3081.63	187770	7.83328e+06	-3245.65	3086.8	3084.21	5.17153	8.01774	32.8225	0.572861	9.54091
	17750	187732	7.83341e+06	-3237.88	3075.13	187722	7.83341e+06	-3241.73	3080.91	3078.02	5.78061	10.1561	29.6474	0.517444	11.686
	17875	187798	7.83353e+06	-3234.51	3070.07	187791	7.83353e+06	-3238.23	3075.65	3072.86	5.57954	6.14232	42.2513	0.737424	8.29816
	18000	187842	7.83365e+06	-3231.89	3066.15	187837	7.83365e+06	-3239.46	3077.5	3071.82	11.3517	4.76055	67.2483	1.1737	12.3095
	18125	187853	7.83377e+06	-3229.71	3062.88	187842	7.83378e+06	-3235.79	3071.99	3067.44	9.10913	11.2663	38.9565	0.67992	14.4881
	18250	187838	7.8339e+06	-3229.57	3062.67	187826	7.8339e+06	-3237.13	3074	3068.34	11.3286	11.2861	45.1075	0.787275	15.991
	18375	187859	7.83403e+06	-3230.04	3063.38	187851	7.83403e+06	-3237.22	3074.14	3068.76	10.7601	8.44068	51.8878	0.905613	13.6757
	18500	187876	7.83415e+06	-3227.35	3059.35	187869	7834151	-3235.12	3070.99	3065.17	11.6357	7.1309	58.4981	1.02098	13.647
	18625	187821	7.83428e+06	-3225.05	3055.91	187816	7834284	-3229.18	3062.09	3059	6.17692	5.04207	50.7761	0.886209	7.97351
	18750	187840	7.83441e+06	-3221.97	3051.31	187835	7.83441e+06	-3224.51	3055.1	3053.21	3.79436	5.64868	33.8902	0.591496	6.80476
	18875	187875	7.83453e+06	-3221.54	3050.67	187875	7.83453e+06	-3221.54	3050.67	3050.67	0	0	0	0	0
HA	750	184541	7.81668e+06	-3366.84	3272.46	184500	7.81669e+06	-3406.2	3334.21	3303.34	61.7523	40.9867	56.4266	0.984831	74.1165
	875	184551	7.81681e+06	-3367.2	3273.02	184509	7.81681e+06	-3408.75	3338.24	3305.63	65.216	41.8438	57.315	1.00034	77.4857
	1000	184581	7.81693e+06	-3365.86	3270.93	184546	7.81694e+06	-3400.85	3325.78	3298.36	54.8452	35.4808	57.1002	0.996586	65.3214
	1125	184572	7.81706e+06	-3369.04	3275.89	184539	7.81706e+06	-3402.73	3328.74	3302.32	52.8467	34.1684	57.115	0.996846	62.9306
	1250	184587	7.81718e+06	-3375.3	3285.68	184555	7.81719e+06	-3407.91	3336.91	3311.29	51.2384	32.2831	57.7868	1.00857	60.5604
	1375	184557	7.81731e+06	-3379.94	3292.94	184530	7.81732e+06	-3407.81	3336.76	3314.85	43.8198	27.4617	57.9247	1.01098	51.7138
	1500	184583	7.81744e+06	-3382.97	3297.68	184545	7.81744e+06	-3428.78	3369.96	3333.82	72.2794	38.506	61.9541	1.0813	81.8964
	1625	184612	7.81756e+06	-3397	3319.72	184586	7.81756e+06	-3428.73	3369.88	3344.8	50.1658	26.6753	61.9985	1.08208	56.8171
	1750	184625	7.81768e+06	-3389.98	3308.68	184592	7.81769e+06	-3434.42	3378.93	3343.8	70.247	33.9873	64.1811	1.12017	78.0371
	1875	184645	7.81781e+06	-3384.66	3300.33	184630	7.81781e+06	-3402.77	3328.8	3314.57	28.4729	14.9564	62.2877	1.08713	32.162
	2000	184656	7.81793e+06	-3381.69	3295.68	184627	7.81793e+06	-3418.14	3353.09	3324.38	57.4112	29.2975	62.9644	1.09894	64.4546
	2125	184652	7.81806e+06	-3387.56	3304.88	184632	7.81806e+06	-3414.44	3347.23	3326.06	42.3512	20.6348	64.0233	1.11742	47.1107
	2250	184608	7.81819e+06	-3383.05	3297.81	184586	7.81819e+06	-3402.95	3329.09	3313.45	31.2806	22.2994	54.5156	0.951477	38.4153
	2375	184660	7.81831e+06	-3376.63	3287.76	184631	7.81831e+06	-3407.46	3336.2	3311.98	48.4478	29.3272	58.8119	1.02646	56.6328
	2500	184589	7.81844e+06	-3376.13	3286.97	184570	7.81845e+06	-3398.15	3321.53	3304.25	34.5537	18.4455	61.9057	1.08046	39.1688
	2625	184605	7.81857e+06	-3379.63	3292.45	184599	7.81857e+06	-3384.86	3300.65	3296.55	8.19512	6.02074	53.6962	0.937176	10.169
	2750	184702	7.81868e+06	-3385.92	3302.31	184692	7.81868e+06	-3387.81	3305.27	3303.79	2.96554	9.75174	16.9147	0.295217	10.1927
	2875	184699	7.81881e+06	-3392.26	3312.26	184690	7.81881e+06	-3399.45	3323.57	3317.92	11.3113	8.9964	51.5032	0.8989	14.4527
	3000	184722	7818930	-3382.65	3297.18	184698	7.81893e+06	-3402.13	3327.8	3312.49	30.6149	24.8594	50.9233	0.888779	39.4368
	3125	184792	7.81905e+06	-3392.64	3312.86	184776	7.81905e+06	-3405.41	3332.97	3322.91	20.1084	16.2972	50.9764	0.889706	25.8833
	3250	184839	7.81917e+06	-3395.4	3317.2	184818	7.81917e+06	-3414.57	3347.44	3332.32	30.2387	21.5018	54.5846	0.952681	37.104
	3375	184840	7.81929e+06	-3404.47	3331.49	184824	7.81929e+06	-3419.55	3355.32	3343.4	23.8359	16.4696	55.3571	0.966164	28.9724
	3500	184838	7.81942e+06	-3410.84	3341.54	184815	7.81942e+06	-3430.21	3372.23	3356.89	30.6926	23.1353	52.9919	0.924883	38.4354
	3625	184887	7.81954e+06	-3413.39	3345.57	184863	7.81954e+06	-3433.44	3377.37	3361.47	31.7967	24.0631	52.8823	0.92297	39.8756
	3750	184901	7.81966e+06	-3421.18	3357.9	184875	7.81967e+06	-3439.7	3387.33	3372.62	29.4302	25.6669	48.9073	0.853594	39.0503
	3875	184919	7.81979e+06	-3428.01	3368.74	184897	7.81979e+06	-3442.95	3392.51	3380.63	23.7758	22.8935	46.0831	0.804302	33.0061
	4000	184931	7.81991e+06	-3430.8	3373.17	184912	7.81991e+06	-3443.13	3392.8	3382.99	19.6306	19.0409	45.8737	0.800647	27.3481
	4125	184946	7.82004e+06	-3437.39	3383.65	184931	7.82004e+06	-3449.97	3403.72	3393.69	20.0675	15.2901	52.6951	0.919702	25.2287
	4250	184989	7.82016e+06	-3438.81	3385.92	184975	7.82016e+06	-3450.56	3404.66	3395.29	18.7489	14.2903	52.6857	0.919538	23.574
	4375	184980	7.82028e+06	-3439.96	3387.75	184970	7.82028e+06	-3448.83	3401.9	3394.82	14.1522	10.8011	52.6488	0.918895	17.8031
	4500	184991	7.82041e+06	-3441.11	3389.58	184980	7.82041e+06	-3448.32	3401.09	3395.33	11.5047	10.6597	47.1834	0.823506	15.684
	4625	185037	7.82053e+06	-3443.75	3393.79	185021	7.82053e+06	-3447.93	3400.46	3397.13	6.67204	15.8035	22.8888	0.399486	17.1542
	4750	185024	7.82066e+06	-3438.83	3385.95	185013	7.82066e+06	-3447.85	3400.34	3393.14	14.3872	11.5082	51.344	0.896122	18.4236
	4875	185020	7.82078e+06	-3441.36	3389.98	185010	7.82078e+06	-3448.24	3400.96	3395.47	10.9784	9.82375	48.1771	0.84085	14.732
	5000	184997	7.82091e+06	-3441.32	3389.92	184981	7.82091e+06	-3451.06	3405.46	3397.69	15.5484	15.4202	45.2371	0.789536	21.8983
	5125	184997	7.82104e+06	-3440.96	3389.34	184976	7.82104e+06	-3453.65	3409.61	3399.47	20.2641	20.7253	44.3553	0.774147	28.9857
	5250	184966	7.82117e+06	-3441.25	3389.8	184958	7.82117e+06	-3444.65	3395.23	3392.52	5.4225	8.81403	31.6003	0.55153	10.3485
	5375	184976	7.82129e+06	-3441.98	3390.97	184972	7.82129e+06	-3443.65	3393.63	3392.3	2.6633	3.92329	34.1704	0.596386	4.74187
	5500	185044	7.82141e+06	-3444.25	3394.59	185044	7.82141e+06	-3444.25	3394.59	3394.59	0	0	0	0	0
	5625	185060	7.82153e+06	-3438.29	3385.09	185050	7.82153e+06	-3445.5	3396.58	3390.84	11.4954	9.89315	49.2841	0.86017	15.1664
	5750	185051	7.82166e+06	-3440.91	3389.26	185031	7.82166e+06	-3452.34	3407.51	3398.39	18.2485	20.4722	41.7131	0.728031	27.4248
	5875	185091	7.82178e+06	-3443.47	3393.34	185070	7.82178e+06	-3456.82	3414.68	3404.01	21.3355	21.6432	44.5898	0.778238	30.3913
	6000	185104	7.82191e+06	-3445.58	3396.71	185088	7.82191e+06	-3451.15	3405.61	3401.16	8.8972	15.7328	29.489	0.51468	18.0743
	6125	185171	7.82202e+06	-3443.83	3393.92	185166	7.82202e+06	-3447.44	3399.68	3396.8	5.76188	5.46502	46.5147	0.811834	7.94139
	6250	185225	7.82214e+06	-3436.29	3381.9	185220	7.82214e+06	-3440.29	3388.27	3385.09	6.37084	5.40552	49.6862	0.867187	8.35507
	6375	185250	7.82226e+06	-3428.25	3369.12	185255	7.82226e+06	-3432.91	3376.53	3372.82	7.40551	5.25419	54.6444	0.953725	9.0801
	6500	185322	7.82238e+06	-3428	3368.72	185319	7.82238e+06	-3430.38	3372.5	3370.61	3.78069	3.6603	45.927	0.801577	5.26227
	6625	185343	7.8225e+06	-3425.36	3364.53	185335	7.82251e+06	-3430.87	3373.28	3368.91	8.75006	7.58359	49.0849	0.856693	11.579
	6750	185327	7.82263e+06	-3421.17	3357.89	185302	7.82264e+06	-3442.13	3391.21	3374.55	33.3192	25.879	52.1635	0.910425	42.1888
	6875	185306	7.82276e+06	-3418.5	3353.66	185300	7.82276e+06	-3423.34	3361.33	3357.49	7.67007	6.58509	49.3525	0.861363	10.1091
	7000	185279	7.82289e+06	-3409.16	3338.89	185257	7.82289e+06	-3421.86	3358.98	3348.93	20.0944	22.571	41.6779	0.727417	30.2198
	7125	185319	7.82301e+06	-3408.7	3338.16	185302	7.82301e+06	-3421.16	3357.87	3348.02	19.7114	17.5276	48.3561	0.843972	26.3772
	7250	185343	7.82314e+06	-3408.55	3337.92	185324	7.82314e+06	-3422.75	3360.39	3349.16	22.4687	19.1823	49.5115	0.864138	29.5432
	7375	185388	7.82326e+06	-3407.01	3335.49	185372	7.82326e+06	-3418.97	3354.4	3344.95	18.9097	16.2773	49.2784	0.86007	24.9505
	7500	185421	7.82338e+06	-3411.25	3342.19	185403	7.82338e+06	-3424	3362.37	3352.28	20.1859	17.9419	48.3682	0.844185	27.0071
	7625	185464	7.8235e+06	-3411.35	3342.35	185440	7.8235e+06	-3425.5	3364.75	3353.55	22.4076	23.216	43.985	0.767683	32.2658
	7750	185493	7.82362e+06	-3410.33	3340.74	185479	7.82362e+06	-3423.04	3360.85	3350.79	20.1171	13.5647	56.0088	0.977538	24.2631
	7875	185598	7.82373e+06	-3410.81	3341.49	185561	7.82374e+06	-3436.63	3382.44	3361.97	40.9508	37.1031	47.8222	0.834654	55.2595
	8000	185638	7.82385e+06	-3412.97	3344.91	185602	7.82386e+06	-3431.21	3373.82	3359.37	28.9152	35.9434	38.8155	0.677458	46.1304
	8125	185713	7.82397e+06	-3407.14	3335.7	185676	7.82397e+06	-3435.37	3380.44	3358.07	44.7411	37.7989	49.8077	0.869308	58.5707
	8250	185758	7.82409e+06	-3410.95	3341.71	185720	7.82409e+06	-3441.85	3390.76	3366.24	49.0459	38.8384	51.625	0.901027	62.5613
	8375	185729	7.82422e+06	-3408.52	3337.88	185674	7.82423e+06	-3436.9	3382.87	3360.38	44.9979	55.5896	38.989	0.680486	71.5193
	8500	185713	7.82435e+06	-3405	3332.32	185680	7.82435e+06	-3429.67	3371.38	3351.85	39.0545	33.382	49.4777	0.863548	51.3772
	8625	185749	7.82447e+06	-3408.47	3337.8	185719	7.82447e+06	-3426.25	3365.94	3351.87	28.1473	31.1134	42.1346	0.735388	41.9561
	8750	185787	7.82459e+06	-3403.86	3330.52	185758	7.82459e+06	-3424	3362.37	3346.45	31.8516	29.7911	46.9145	0.818812	43.6124
	8875	185856	7.82471e+06	-3401.08	3326.14	185830	7.82471e+06	-3425.75	3365.15	3345.65	39.01	26.2921	56.0207	0.977746	47.0431
	9000	185861	7.82483e+06	-3400.22	3324.79	185835	7.82484e+06	-3418.5	3353.66	3339.22	28.8716	25.6669	48.3628	0.844091	38.6311
	9125	185912	7.82495e+06	-3398.56	3322.17	185896	7.82495e+06	-3410.47	3340.96	3331.56	18.7842	16.0851	49.4264	0.862653	24.7301
	9250	185958	7.82507e+06	-3396.68	3319.21	185942	7.82507e+06	-3409.81	3339.91	3329.56	20.7007	16.5304	51.3912	0.896945	26.491
	9375	185984	7.82519e+06	-3392.15	3312.09	185969	7.8252e+06	-3403.68	3330.24	3321.16	18.1499	14.552	51.2786	0.894981	23.2633
	9500	186013	7.82532e+06	-3390.33	3309.23	186001	7.82532e+06	-3399.58	3323.78	3316.5	14.5483	12.2238	49.9621	0.872004	19.002
	9625	186072	7.82544e+06	-3387.15	3304.24	186062	7.82544e+06	-3394.92	3316.44	3310.34	12.2066	9.96386	50.7762	0.886212	15.7569
	9750	186069	7.82556e+06	-3385	3300.87	186053	7.82556e+06	-3389.3	3307.61	3304.24	6.74756	16.1273	22.7041	0.396261	17.482
	9875	186124	7.82568e+06	-3382.23	3296.52	186110	7.82568e+06	-3389.18	3307.42	3301.97	10.9013	14.1501	37.6108	0.656432	17.8624
	10000	186072	7.82581e+06	-3380.52	3293.84	186066	7.82581e+06	-3384.24	3299.67	3296.76	5.82926	6.14232	43.5021	0.759254	8.46808
	10125	186063	7.82594e+06	-3382.01	3296.18	186053	7.82594e+06	-3390.75	3309.89	3303.03	13.7117	10.2156	53.3128	0.930483	17.0988
	10250	186080	7.82606e+06	-3386.46	3303.16	186062	7.82607e+06	-3396.72	3319.28	3311.22	16.1209	18.2135	41.5123	0.724525	24.3232
	10375	186098	7.82619e+06	-3385.25	3301.26	186081	7.82619e+06	-3394.49	3315.77	3308.51	14.511	16.3692	41.5564	0.725295	21.875
	10500	186092	7.82631e+06	-3385.31	3301.35	186070	7.82632e+06	-3392	3311.85	3306.6	10.5026	21.9049	25.616	0.447083	24.2926
	10625	186156	7.82643e+06	-3387.19	3304.3	186141	7.82643e+06	-3395.09	3316.71	3310.51	12.4112	15.0469	39.5169	0.6897	19.505
	10750	186246	7.82655e+06	-3388.89	3306.97	186230	7.82655e+06	-3399	3322.87	3314.92	15.8962	16.5899	43.7767	0.764047	22.9764
	10875	186216	7.82668e+06	-3389.45	3307.85	186200	7.82668e+06	-3399.49	3323.64	3315.74	15.7885	16.3269	44.0396	0.768636	22.7123
	11000	186198	7.82681e+06	-3392.25	3312.25	186186	7.82681e+06	-3400.05	3324.52	3318.38	12.272	12.7882	43.82	0.764804	17.724
	11125	186259	7.82692e+06	-3384.44	3299.99	186248	7.82692e+06	-3391.84	3311.6	3305.79	11.6154	11.4375	45.4423	0.793118	16.3014
	11250	186336	7.82704e+06	-3385.81	3302.14	186329	7.82704e+06	-3391.04	3310.35	3306.24	8.20998	6.43506	51.9103	0.906006	10.4314
	11375	186284	7.82717e+06	-3388.14	3305.79	186274	7.82717e+06	-3392.41	3312.5	3309.14	6.70662	9.97507	33.9144	0.591918	12.02
	11500	186212	7.82731e+06	-3391.17	3310.55	186203	7.82731e+06	-3395.47	3317.31	3313.93	6.75975	9.81253	34.5626	0.60323	11.9155
	11625	186308	7.82742e+06	-3387.86	3305.35	186296	7.82742e+06	-3393.44	3314.12	3309.73	8.76511	12.7585	34.4892	0.601951	15.4792
	11750	186403	7.82779e+06	-3390.44	3309.4	186390	7.82779e+06	-3398.16	3321.54	3315.47	12.1396	13.5336	41.892	0.731153	18.1804
	11875	186465	7.82791e+06	-3388.63	3306.56	186449	7.82791e+06	-3399.75	3324.05	3315.3	17.4855	16.4795	46.6964	0.815007	24.0274
	12000	186504	7.82803e+06	-3391.29	3310.74	186493	7.82803e+06	-3399.32	3323.37	3317.05	12.6308	11.5875	47.4667	0.82845	17.1408
	12125	186509	7.82815e+06	-3391.51	3311.08	186499	7.82815e+06	-3398.35	3321.84	3316.46	10.7578	9.42926	48.7653	0.851114	14.3053
	12250	186520	7.82828e+06	-3392.75	3313.03	186514	7.82828e+06	-3396.08	3318.27	3315.65	5.23656	5.73792	42.3843	0.739746	7.76822
	12375	186579	7.82839e+06	-3390.76	3309.91	186573	7.8284e+06	-3394.95	3316.49	3313.2	6.58593	6.17207	46.858	0.817827	9.02601
	12500	186602	7.82852e+06	-3392.55	3312.72	186593	7.82852e+06	-3394.48	3315.75	3314.24	3.0342	8.76446	19.0955	0.33328	9.27481
	12625	186613	7.82864e+06	-3388.36	3306.14	186608	7.82864e+06	-3391.13	3310.49	3308.31	4.34999	4.75063	42.4792	0.741403	6.44134
	12750	186623	7.82877e+06	-3386.83	3303.74	186619	7.82877e+06	-3388.58	3306.48	3305.11	2.74655	3.58098	37.4876	0.654281	4.51297
	12875	186608	7.82889e+06	-3383.98	3299.27	186600	7.8289e+06	-3387.21	3304.33	3301.8	5.0662	8.3911	31.1219	0.543179	9.80188
	13000	186590	7.82902e+06	-3379.38	3292.06	186590	7.82902e+06	-3379.38	3292.06	3292.06	0	0	0	0	0
	13125	186809	7.82963e+06	-3374.7	3284.74	186809	7.82963e+06	-3374.7	3284.74	3284.74	0	0	0	0	0
	13250	186871	7.82974e+06	-3368.69	3275.35	186861	7.82974e+06	-3373.77	3283.28	3279.32	7.93435	9.88324	38.7578	0.676451	12.6741
	13375	186894	7.82987e+06	-3367.64	3273.71	186885	7.82987e+06	-3373.05	3282.16	3277.93	8.44757	9.97378	40.2639	0.702737	13.0705
	13500	186953	7.82998e+06	-3363.11	3266.65	186931	7.82999e+06	-3370.33	3277.91	3272.28	11.2618	21.4919	27.6547	0.482665	24.2637
	13625	186990	7.83011e+06	-3363.49	3267.24	186986	7.83011e+06	-3366.03	3271.2	3269.22	3.95962	4.15395	43.628	0.761451	5.73881
	13750	187042	7.83023e+06	-3361.16	3263.61	187032	7.83023e+06	-3367.67	3273.76	3268.68	10.1474	9.1266	48.0318	0.838313	13.6479
	13875	187032	7.83035e+06	-3359.66	3261.27	187021	7.83035e+06	-3367.58	3273.62	3267.45	12.3424	11.074	48.1004	0.839511	16.5822
	14000	187057	7.83048e+06	-3358.28	3259.13	187043	7.83048e+06	-3368.78	3275.49	3267.31	16.3626	14.6735	48.1151	0.839766	21.9783
	14125	187054	7.8306e+06	-3359.47	3260.98	187049	7.8306e+06	-3363.48	3267.22	3264.1	6.24515	5.08303	50.8573	0.887627	8.05228
	14250	187081	7.83072e+06	-3355.09	3254.17	187074	7.83073e+06	-3363.19	3266.77	3260.47	12.6062	7.5228	59.1732	1.03277	14.6802
	14375	187133	7.83084e+06	-3353.68	3251.97	187122	7.83084e+06	-3362.05	3265	3258.48	13.0215	10.6399	50.7477	0.885715	16.8157
	14500	187150	7.83097e+06	-3354.46	3253.19	187140	7.83097e+06	-3362.34	3265.45	3259.32	12.2611	10.0954	50.5332	0.881971	15.8824
	14625	187191	7.83109e+06	-3354.41	3253.11	187177	7.83109e+06	-3364.41	3268.67	3260.89	15.5645	14.392	47.2413	0.824517	21.1986
	14750	187208	7.83121e+06	-3352.38	3249.95	187172	7.83122e+06	-3371.17	3279.22	3264.59	29.266	36.9419	38.3869	0.669978	47.1296
	14875	187190	7.83134e+06	-3352.66	3250.39	187159	7.83134e+06	-3371.17	3279.22	3264.81	28.8311	31.5463	42.4252	0.740459	42.7364
	15000	187184	7.83147e+06	-3354.06	3252.56	187156	7.83147e+06	-3369.62	3276.8	3264.68	24.2357	27.5423	41.3459	0.721622	36.6872
	15125	187193	7.83159e+06	-3351.4	3248.43	187177	7.83159e+06	-3363.12	3266.66	3257.55	18.23	16.3778	48.0635	0.838866	24.5064
	15250	187172	7.83172e+06	-3352.95	3250.84	187165	7.83172e+06	-3357.66	3258.16	3254.5	7.32197	6.3941	48.8701	0.852944	9.72089
	15375	187233	7.83184e+06	-3349.31	3245.19	187221	7.83184e+06	-3357.49	3257.9	3251.54	12.7091	12.0117	46.6159	0.813601	17.4872
	15500	187272	7.83196e+06	-3348.31	3243.64	187261	7.83196e+06	-3355.31	3254.51	3249.07	10.8707	11.1038	44.3922	0.77479	15.5391
	15625	187335	7.83208e+06	-3343.82	3236.68	187326	7.83208e+06	-3348.67	3244.2	3240.44	7.51941	9.19861	39.2643	0.685291	11.8809
	15750	187350	7.8322e+06	-3335.67	3224.06	187342	7.8322e+06	-3340.78	3231.97	3228.02	7.90367	7.35294	47.0673	0.82148	10.7951
	15875	187307	7.83233e+06	-3330.61	3216.25	187300	7.83233e+06	-3335.52	3223.83	3220.04	7.58268	7.24127	46.3193	0.808425	10.4849
	16000	187423	7.83244e+06	-3327.65	3211.68	187414	7.83245e+06	-3334.82	3222.75	3217.22	11.0668	9.0572	50.7028	0.884931	14.3006
	16125	187397	7.83257e+06	-3328.36	3212.78	187388	7.83257e+06	-3331.42	3217.5	3215.14	4.72119	9.09686	27.4289	0.478725	10.249
	16250	187448	7.83269e+06	-3323.79	3205.74	187441	7.83269e+06	-3325.93	3209.03	3207.38	3.2968	6.80712	25.8417	0.451022	7.56345
	16375	187526	7.83281e+06	-3320.08	3200.03	187526	7.83281e+06	-3320.08	3200.03	3200.03	0	0	0	0	0
	16500	187525	7.83294e+06	-3312.05	3187.69	187514	7.83294e+06	-3318.44	3197.5	3192.6	9.81594	10.8222	42.2085	0.736677	14.6107
	16625	187547	7.83306e+06	-3312.43	3188.27	187531	7.83306e+06	-3314.61	3191.62	3189.94	3.34706	16.2575	11.6334	0.203041	16.5985
	16750	187577	7.83318e+06	-3310.27	3184.96	187559	7.83318e+06	-3320.72	3201.01	3192.98	16.0539	18.0126	41.7092	0.727963	24.1284
	16875	187666	7.8333e+06	-3307.69	3181	187660	7.8333e+06	-3311.66	3187.09	3184.04	6.08831	6.82825	41.7213	0.728175	9.14836
	17000	187611	7.83343e+06	-3307.11	3180.11	187611	7.83343e+06	-3307.11	3180.11	3180.11	0	0	0	0	0
	17125	187766	7.83366e+06	-3300.02	3169.26	187766	7.83366e+06	-3300.02	3169.26	3169.26	0	0	0	0	0
	17250	187748	7.83379e+06	-3297.83	3165.91	187745	7.83379e+06	-3299.64	3168.68	3167.29	2.76668	3.11578	41.6036	0.726121	4.16684
	17375	187757	7.83391e+06	-3294.66	3161.07	187749	7.83391e+06	-3300.96	3170.7	3165.88	9.62719	7.89616	50.6416	0.883863	12.4512
	17500	187783	7.83404e+06	-3292.9	3158.38	187778	7.83404e+06	-3296.89	3164.47	3161.43	6.09187	4.90066	51.1847	0.893342	7.8184
	17625	187817	7.83416e+06	-3290.15	3154.19	187808	7.83416e+06	-3297.23	3164.99	3159.59	10.8057	8.70367	51.1496	0.89273	13.8751
	17750	187746	7.83429e+06	-3287.07	3149.49	187743	7.83429e+06	-3289.65	3153.43	3151.46	3.93135	3.10717	51.6787	0.901963	5.01099
	17875	187762	7.83442e+06	-3283.97	3144.78	187762	7.83442e+06	-3283.97	3144.78	3144.78	0	0	0	0	0
*Along-strike distance of EF2 based on relative distance along of EF1, with 0 m corresponding to the southern-most limit of the Chandon 3D survey
†X and Y data based on Co-ordinate Reference System WGS_1984_UTM_Zone_50S

## Sheet: Maximum displacement data
Table S3: Maximum displacement-length plot data
Distance	EF1 maximum displacement	EF2 maximum displacement	Cumulative maximum displacement
(m)	(m)	(m)	(m)
0	39.707	N/A*	39.707
125	25.4306	N/A	25.4306
250	27.274	N/A	27.274
375	27.024	N/A	27.024
500	27.1889	N/A	27.1889
625	39.9868	N/A	39.9868
750	43.1486	80.7173	123.866
875	40.4958	77.4857	117.982
1000	32.3647	71.5085	103.873
1125	50.4716	71.599	122.071
1250	50.3388	67.2738	117.613
1375	46.858	73.0675	119.925
1500	33.6025	81.8964	115.499
1625	29.7101	92.1408	121.851
1750	38.5303	100.854	139.384
1875	41.4469	97.0722	138.519
2000	24.1614	83.8038	107.965
2125	27.0031	88.4337	115.437
2250	43.5664	60.5825	104.149
2375	44.8632	56.6328	101.496
2500	41.2149	46.824	88.0389
2625	33.0661	27.0088	60.0749
2750	29.8296	18.9131	48.7427
2875	45.3769	21.9714	67.3483
3000	59.8756	39.4368	99.3125
3125	69.8966	34.5921	104.489
3250	75.779	44.6533	120.432
3375	61.4947	39.736	101.231
3500	29.1554	40.912	70.0674
3625	34.6252	44.4173	79.0425
3750	37.5849	41.8563	79.4412
3875	40.742	54.511	95.253
4000	50.3942	51.2641	101.658
4125	29.1622	56.4219	85.5841
4250	33.3243	62.6857	96.0101
4375	27.2792	61.2984	88.5776
4500	30.9335	66.5592	97.4927
4625	27.4768	66.6161	94.093
4750	30.5266	38.5571	69.0837
4875	29.027	31.7161	60.7431
5000	29.8279	31.6867	61.5146
5125	38.3275	28.9857	67.3132
5250	38.5647	35.0851	73.6498
5375	45.9416	25.8016	71.7431
5500	35.7997	24.283	60.0827
5625	34.0707	29.4598	63.5305
5750	31.5624	34.6277	66.1901
5875	46.416	31.8307	78.2467
6000	43.4837	34.8309	78.3146
6125	29.4011	33.7025	63.1036
6250	41.9466	35.8548	77.8014
6375	52.9537	32.427	85.3807
6500	50.3849	20.9616	71.3464
6625	30.6424	30.0397	60.6821
6750	40.5503	42.1888	82.7391
6875	44.2557	57.3605	101.616
7000	39.2293	59.2001	98.4294
7125	34.6863	52.9492	87.6356
7250	40.7727	51.1837	91.9564
7375	31.9428	46.5215	78.4643
7500	33.8629	56.4664	90.3293
7625	26.2196	85.579	111.799
7750	32.7131	77.113	109.826
7875	29.921	71.6005	101.522
8000	53.7579	65.2839	119.042
8125	39.3907	60.4232	99.8138
8250	44.6586	62.5613	107.22
8375	54.2119	71.5193	125.731
8500	32.9524	64.0152	96.9676
8625	25.1329	62.8505	87.9834
8750	34.0251	55.4593	89.4844
8875	31.1434	54.8295	85.9729
9000	23.9999	51.439	75.4388
9125	31.6165	47.1733	78.7898
9250	23.328	47.8812	71.2092
9375	28.1785	36.1559	64.3344
9500	49.1097	33.8313	82.941
9625	55.3153	28.92	84.2353
9750	25.9258	50.2401	76.166
9875	53.6345	22.9093	76.5438
10000	48.2705	42.2766	90.5471
10125	39.3277	38.9478	78.2754
10250	40.8972	28.15	69.0472
10375	38.6529	34.2847	72.9376
10500	36.8512	26.0952	62.9464
10625	40.836	20.3027	61.1387
10750	39.4041	31.1578	70.5618
10875	33.6547	27.5069	61.1615
11000	38.5402	26.8736	65.4138
11125	20.431	30.4828	50.9138
11250	32.7992	31.5371	64.3363
11375	40.8934	28.0908	68.9841
11500	25.5164	38.0081	63.5245
11625	21.1653	28.5774	49.7427
11750	23.9165	32.0052	55.9216
11875	20.917	35.7455	56.6625
12000	31.2225	27.9809	59.2033
12125	21.9372	28.7479	50.6851
12250	24.2275	36.8308	61.0583
12375	30.8104	37.4802	68.2905
12500	28.1172	27.6996	55.8168
12625	24.4042	25.8233	50.2274
12750	24.5768	32.7749	57.3516
12875	14.6889	28.0735	42.7624
13000	16.1692	22.6541	38.8233
13125	19.5717	31.1076	50.6793
13250	23.2464	18.8666	42.1131
13375	26.7676	27.7167	54.4843
13500	27.3006	35.1153	62.4159
13625	21.6469	28.7359	50.3827
13750	22.1377	28.9121	51.0498
13875	18.3654	22.032	40.3974
14000	11.9329	21.9783	33.9112
14125	26.8033	16.0553	42.8586
14250	19.6807	14.6802	34.3609
14375	29.532	22.9606	52.4926
14500	21.2853	15.8824	37.1677
14625	22.4694	21.1986	43.668
14750	24.8561	47.1296	71.9858
14875	20.0531	42.7364	62.7895
15000	15.8751	36.6872	52.5623
15125	17.5473	24.5064	42.0537
15250	23.3075	22.8303	46.1379
15375	23.8452	20.8443	44.6895
15500	14.7945	15.5391	30.3337
15625	42.7701	16.3234	59.0935
15750	22.8598	37.4299	60.2897
15875	23.5954	33.21	56.8054
16000	29.3439	26.8026	56.1465
16125	29.691	27.9699	57.6608
16250	18.5206	32.2706	50.7912
16375	20.9128	21.644	42.5568
16500	18.6573	25.8431	44.5005
16625	12.9511	21.848	34.7991
16750	28.3496	24.1284	52.478
16875	20.17	28.5632	48.7332
17000	16.2402	31.2084	47.4485
17125		22.9945	22.9945
17250	23.3035	31.9162	55.2197
17375	21.1545	24.7109	45.8654
17500	17.552	32.4421	49.9942
17625	17.6547	22.5464	40.2011
17750	15.4253	23.0753	38.5006
17875	16.3514	33.7357	50.0872
18000	20.3846	26.423	46.8076
18125	11.7959	31.3222	43.1181
18250	18.6475	21.6701	40.3176
18375	17.0022	19.2738	36.276
18500	19.7559	13.647	33.4029
18625	16.2948	32.9597	49.2545
18750	14.8121	23.6329	38.445
18875	4.85312	14.9905	19.8436
19000	0	15.6027	15.6027
*N/A = fault section does not exist or not resolved by survey

## Sheet: Total extension data
Table S3: Total extension-length plot data
Distance	EF1 maximum heave	Dip at EF1 maximum heave site	EF2 maximum heave	Dip at EF2 maximum heave site	Total extension	Average fault dip at EF1 and EF2 maximum heave sites
(m)	(m)	(°)	(m)	(°)	(m)	(m)
0	30.6086	44	N/A*	N/A	30.6086	44
125	19.8682	46.27	N/A	N/A	19.8682	46.27
250	23.438	46.88	N/A	N/A	23.438	46.88
375	21.9545	48.01	N/A	N/A	21.9545	48.01
500	21.5414	47.08	N/A	N/A	21.5414	47.08
625	29.5294	51.17	N/A	N/A	29.5294	51.17
750	32.061	46.67	41.4493	59.1019	73.5104	52.886
875	30.3158	53.38	42.9031	54.9407	73.2189	54.1604
1000	21.1892	60.37	42.3672	53.667	63.5564	57.0185
1125	32.0002	56.84	46.6143	49.3794	78.6145	53.1097
1250	32.3538	54.6	38.0818	55.5233	70.4355	55.0616
1375	35.6916	53.28	40.957	55.9071	76.6486	54.5935
1500	20.7352	53.06	38.888	52.2892	59.6232	52.6746
1625	18.577	70.65	41.1988	63.4403	59.7758	67.0452
1750	29.5393	67.08	45.6059	63.1153	75.1452	65.0976
1875	30.8306	47.35	45.7063	61.9106	76.5369	54.6303
2000	17.1146	54.43	36.9518	63.8366	54.0664	59.1333
2125	21.4509	49.8	39.3519	63.5775	60.8028	56.6887
2250	30.3356	52.1	34.894	54.8321	65.2296	53.466
2375	30.0231	48	29.3272	58.8119	59.3503	53.406
2500	29.3471	53.35	26.0899	56.1383	55.4369	54.7442
2625	25.3246	43.93	17.215	50.4028	42.5397	47.1664
2750	22.9741	47.1	12.4657	48.7683	35.4398	47.9341
2875	33.5023	50.36	17.5078	37.1703	51.0101	43.7651
3000	39.1919	57.32	24.8594	50.9233	64.0514	54.1216
3125	54.7734	59.47	20.7154	53.2048	75.4888	56.3374
3250	55.7805	55.72	28.3796	50.5388	84.1601	53.1294
3375	44.5069	55.87	24.981	51.0476	69.4879	53.4588
3500	23.4578	41.24	26.524	45.1893	49.9818	43.2146
3625	24.0433	50.76	28.3796	50.1059	52.4229	50.4329
3750	28.108	46.24	26.4844	50.747	54.5924	48.4935
3875	28.5818	55.42	35.2984	49.6432	63.8802	52.5316
4000	39.8468	40.11	32.7159	50.3435	72.5627	45.2268
4125	21.9954	32.13	35.8032	50.6124	57.7987	41.3712
4250	27.7148	31.62	40.3814	46.9833	68.0962	39.3017
4375	18.5671	53.98	40.6233	48.4928	59.1904	51.2364
4500	22.4097	50.37	45.6059	46.7492	68.0156	48.5596
4625	16.2178	55	43.3558	49.3958	59.5736	52.1979
4750	18.4964	55.36	26.715	46.1424	45.2114	50.7512
4875	25.0927	35.91	22.9741	43.5838	48.0668	39.7469
5000	20.6844	53.35	23.015	43.4203	43.6994	48.3852
5125	25.2837	53.84	20.7253	44.3553	46.009	49.0977
5250	25.1931	52.14	26.8366	40.1019	52.0297	46.1209
5375	31.4954	47.56	19.7466	40.0639	51.242	43.8119
5500	25.6868	49.53	18.8598	39.0437	44.5466	44.2868
5625	24.0023	52.14	22.339	29.2284	46.3414	40.6842
5750	19.212	49.52	30.3059	28.9322	49.5179	39.2261
5875	30.2861	52.94	27.3117	30.9038	57.5978	41.9219
6000	29.0755	48.2	26.0601	41.5661	55.1356	44.8831
6125	19.8372	43.11	25.435	33.7347	45.2722	38.4224
6250	32.0709	51.16	24.0235	47.9313	56.0944	49.5457
6375	37.7282	49.24	23.015	44.1556	60.7433	46.6978
6500	35.7114	48.75	12.808	52.3364	48.5194	50.5432
6625	19.9687	37.33	15.8742	58.0997	35.8429	47.7149
6750	27.1987	52.27	25.879	52.1635	53.0778	52.2168
6875	34.481	36.6	43.0432	41.3751	77.5242	38.9875
7000	29.2169	46.31	39.2105	48.5216	68.4273	47.4158
7125	25.9299	44.65	36.4271	46.531	62.357	45.5905
7250	28.0373	45.8	35.2178	46.5227	63.2551	46.1614
7375	22.6007	49.56	33.2109	44.4483	55.8116	47.0042
7500	25.889	47.74	38.8285	46.5565	64.7175	47.1483
7625	18.7594	48.39	62.1449	43.4338	80.9043	45.9119
7750	27.0586	43.58	54.2078	38.7522	81.2664	41.1661
7875	21.0577	46	49.1446	43.1029	70.2023	44.5515
8000	40.4422	51.65	43.9512	41.8818	84.3934	46.7659
8125	29.2268	48.68	41.37	46.7902	70.5968	47.7351
8250	33.1005	47.45	40.1805	39.7584	73.281	43.6042
8375	42.4181	48.24	55.5896	38.989	98.0076	43.6145
8500	25.5354	37.11	44.9708	45.3719	70.5062	41.241
8625	18.9292	42.71	44.012	45.5518	62.9412	44.1309
8750	26.8974	45.37	42.4888	39.9928	69.3862	42.6814
8875	23.7816	43.22	37.0932	47.4278	60.8748	45.3239
9000	18.8189	40.99	36.1456	43.7047	54.9644	42.3474
9125	22.6913	48.78	36.0141	37.5868	58.7053	43.1834
9250	17.1556	42.98	33.3932	29.703	50.5488	36.3415
9375	20.161	51.26	23.9118	48.5969	44.0728	49.9284
9500	35.0565	51.03	22.1976	48.9948	57.2542	50.0124
9625	40.8044	53.97	18.8896	40.2118	59.6939	47.0909
9750	18.9193	49.57	37.6886	41.395	56.6079	45.4825
9875	39.11	49.43	16.5701	43.6731	55.6801	46.5515
10000	34.2094	54.75	32.1317	40.5326	66.3411	47.6413
10125	29.6708	48.81	29.9028	39.8462	59.5736	44.3281
10250	31.163	46.36	24.1041	31.0994	55.2671	38.7297
10375	29.3583	44.56	26.8267	38.5128	56.1849	41.5364
10500	30.0951	44.81	21.9049	25.616	52	35.213
10625	34.9349	30.5	16.3183	25.0706	51.2532	27.7853
10750	28.1377	50.19	23.206	41.8589	51.3438	46.0244
10875	24.6176	49.05	20.0691	43.1468	44.6867	46.0984
11000	29.4686	49.45	19.857	42.3619	49.3257	45.906
11125	15.409	40.41	22.1877	43.2914	37.5967	41.8507
11250	23.1664	44.07	23.0138	43.1357	46.1801	43.6029
11375	34.4909	30.05	21.5117	40.0225	56.0026	35.0362
11500	20.765	41.42	33.4329	28.4027	54.1979	34.9114
11625	16.0143	43.77	22.2683	38.8099	38.2827	41.29
11750	18.8301	45.39	26.6357	33.6714	45.4658	39.5307
11875	16.5205	46.48	30.9509	30.0182	47.4714	38.2491
12000	25.9795	41.52	23.6091	32.4606	49.5886	36.9903
12125	19.1922	50.1	20.151	45.4962	39.3433	47.7981
12250	20.1696	31.57	28.2184	39.9895	48.3879	35.7798
12375	24.2752	36.52	25.1931	47.7651	49.4684	42.1425
12500	21.5117	37.76	18.9404	46.8602	40.4521	42.3101
12625	20.1709	34.32	17.3875	47.6756	37.5584	40.9978
12750	20.3209	32.47	23.3884	44.4707	43.7093	38.4704
12875	11.7699	34.66	20.6136	42.754	32.3835	38.707
13000	13.1715	46.53	16.5701	42.993	29.7415	44.7615
13125	14.1898	38.15	23.0349	42.2267	37.2247	40.1884
13250	18.2334	37.56	14.5024	39.7646	32.7357	38.6623
13375	21.4707	39.12	23.9924	30.0454	45.4632	34.5827
13500	20.8456	37.1	29.6001	32.5479	50.4457	34.8239
13625	17.7496	40.67	24.114	32.9484	41.8636	36.8092
13750	19.2927	31.72	25.9088	26.347	45.2015	29.0335
[truncated: 43 more rows]

## Sheet: Heave at horizon HK
Table S3: Cumulative heave-length plot data (at horizon HK)
[truncated: 123 more rows]

[truncated: 4 more sheets: Displacement-depth plot data,  Graben halfwidth & fault depth, Dike height & tip depth, Apparent dike thickness]
